# Supplementary material for: Solvent-dependent oxidations of 5- and 6-azaindoles to trioxopyrrolopyridines and functionalised azaindoles
Source: Royal Society of Chemistry journal article supplement (doi:10.1039/b719776d), 2008-01-01

# Solvent-dependent oxidations of 5- and 6-azaindoles to trioxopyrrolopyridines and functionalized azaindoles†

Zahia Mahiout,<sup>a</sup> Thierry Lomberget,<sup>a</sup> Sylvie Goncalves<sup>a</sup> and Roland Barret<sup>\*a</sup>

<sup>a</sup> Laboratoire de Chimie Thérapeutique, Université de Lyon, Lyon, F-69003, France, Université Lyon 1, ISPB, INSERM U863, IFR 62, 8 avenue Rockefeller, F-69373 Lyon cedex 08, France. Fax: +33 478 777 549; Tel: +33 478 777 542; E-mail: barret@sante.univ-lyon1.fr

## Electronic Supplementary Information

### General

Unless otherwise indicated, all reactions were carried out under a positive pressure of argon and with oven-dried glassware. Melting points were measured on a Barnstead Electrothermal 9200 melting point apparatus and are uncorrected. Infrared spectra (IR) were recorded on a Perkin-Elmer FT-IR SPECTRUM ONE spectrometer (film or 1% in KBr). Proton nuclear magnetic resonance (<sup>1</sup>H NMR) spectra were recorded on Bruker ALS300 and DRX 300 Fourier transform spectrometers, using an internal deuterium lock, operating at 300 MHz. Chemical shifts are reported in parts per million (ppm) relative to internal standard (tetramethylsilane,  $\delta_{\text{H}} = 0.00$ ; CDCl<sub>3</sub>,  $\delta_{\text{H}} = 7.26$ ; acetone-d<sub>6</sub>,  $\delta_{\text{H}} = 2.05$  and DMSO-d<sub>6</sub>,  $\delta_{\text{H}} = 2.50$ ).<sup>1</sup> Data are presented as follows: chemical shift ( $\delta$ , ppm), integration, multiplicity (s = singlet, d = doublet, t = triplet, q = quadruplet, m = multiplet, br = broad), coupling constant (reported in Hz), assignment. Atom numbering refers to pyridine and indole nomenclatures. Carbon magnetic resonance (<sup>13</sup>C NMR) spectra were recorded on Bruker AC200 and DRX 300 Fourier transform spectrometers, using an internal deuterium lock, operating at 50 MHz and 75 MHz respectively. Chemical shifts are reported in parts per million (ppm) relative to internal standard (tetramethylsilane,  $\delta_{\text{C}} = 0.00$ ; CDCl<sub>3</sub>,  $\delta_{\text{C}} = 77.16$ ; acetone-d<sub>6</sub>,  $\delta_{\text{C}} = 29.84$  and DMSO-d<sub>6</sub>,  $\delta_{\text{C}} = 39.52$ ). Carbon multiplicities (indicated in parentheses) were determined by DEPT experiments. Electron-Spray low-resolution mass spectra were recorded on a Thermo ALCQ Advantage spectrometer. Gas chromatography coupled with low-resolution mass spectroscopy (GC-MS) were recorded on a Thermo Focus GC (fused silica column, diameter 0.25 mm, length 15 m, coated with TR5M5, thickness 0.25  $\mu\text{m}$ , initial temperature for 2 min: 70°C, heating rate 15°C/min)-DSQ spectrometer operating at 70 eV. High-resolution mass spectra were recorded on a Thermoquest Finnigan MAT 95 XL spectrometer (for chemical ionisations, isobutane was used). Elemental analyses (Anal.) were performed by the Service Central d'Analyses du CNRS, Solaize, France.

Product purification by flash column chromatography was performed using Merck Kieselgel 60 Å (40-63  $\mu\text{m}$ ). Analytical thin layer chromatography (TLC) was carried out using Merck commercial aluminium sheets coated (0.2 mm layer thickness) with Kieselgel 60 F254, with visualization by ultraviolet and anisaldehyde stain solution. *N,N*-dimethylformamide (HPLC grade) was used as received without purification. THF (anhydrous analytical grade, stored over molecular sieves) was purchased from Carlo Erba Chemicals. Dichloromethane was distilled over calcium hydride prior to use. Diisopropylamine was distilled over sodium hydride prior to use. Methanol and isopropanol were distilled over sodium prior to use. Petroleum ether (PE) refers to the 40-60°C boiling point fraction. MeLi and *n*-BuLi solutions were titrated using *N*-benzylbenzamide.<sup>2</sup> All other chemical reagents were used as received.

5-hydroxy-2-methoxy-pyridine **7** and 2-methoxy-5-methoxymethoxy-pyridine **8b** were prepared according to known procedures.<sup>3</sup> Methyl- and *tert*-butyl azidoacetate were prepared from methyl- and *tert*-butyl bromoacetate and sodium azide according to a literature procedure.<sup>4</sup>

<sup>1</sup> H. E. Gottlieb, V. Kotlyar and A. Nudelman, *J. Org. Chem.* 1997, **62**, 7512.

<sup>2</sup> A. F. Burchat, J. M. Chong and N. Nielsen *J. Organomet. Chem.* 1997, **542**, 281.

<sup>3</sup> H. Van de Poël, G. Guillaumet and M.-C. Viaud-Massuard *Heterocycles* 2002, **57**, 55.

<sup>4</sup> A. T. Moore and H. N. Rydon *Org. Synth.* 1965, **45**, 47.

**General experimental procedure for the methylation of pyridinols: preparation of 2,5-dimethoxy-pyridine 8a**

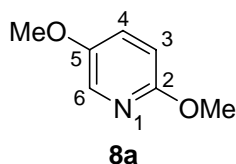

To a solution of 5-hydroxy-2-methoxy-pyridine **7** (1.877 g, 15 mmol) in DMF (45 mL) at room temperature was added  $K_2CO_3$  (3.110 g, 22.5 mmol). The mixture was stirred at 50°C for 10 min, then methyl iodide (935  $\mu$ L, 15 mmol) was added. The reaction mixture was then stirred for 3h30 at 50°C. After addition of water (50 mL) and EtOAc (100 mL) and decantation, the aqueous phase was extracted with EtOAc (2 $\times$ 100 mL) and the organic phase was dried over  $Na_2SO_4$ . After filtration and removal of the solvents under reduced pressure, the residue was purified by flash chromatography (PE/EtOAc 70:30) to afford **8a** (1.790 g, 86%) as a yellow liquid.

$\nu_{max}$  (film)/ $cm^{-1}$  3583, 2947, 2838, 1738, 1611, 1576, 1493, 1464, 1382, 1253, 1185, 1039, 828 and 742;  $\delta_H$  (300 MHz;  $CDCl_3$ ) 3.81 (3H, s,  $OCH_3$ ), 3.89 (3H, s,  $OCH_3$ ), 6.69 (1H, d,  $J$  = 9.0, ArH3), 7.21 (1H, dd,  $J$  = 9.0 and  $J$  = 3.0, ArH4) and 7.80 (1H, d,  $J$  = 3.0, ArH6);  $\delta_C$  (75 MHz;  $CDCl_3$ ) 53.43 ( $CH_3$ ), 56.18 ( $CH_3$ ), 111.02 (CH), 126.73 (CH), 131.01 (CH), 151.05 (C) and 158.73 (C); GC-MS (retention time: 3.97 min)  $m/z$  (EI) 139 ( $M^{+}$ , 96%), 138 (100), 96 (48) and 54 (44).

**2-Methoxy-5-triisopropylsilyloxy-pyridine 8c**

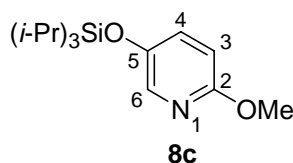

To a solution of 5-hydroxy-2-methoxy-pyridine **7** (2.503 g, 20 mmol) and imidazole (2.859 g, 42 mmol) in DMF (60 mL) at room temperature was added triisopropylsilylchloride (5.2 mL, 24 mmol). The reaction mixture was stirred for 20h, after which water (50 mL) and EtOAc (100 mL) were added. After decantation, the aqueous phase was extracted with EtOAc (2 $\times$ 100 mL) and the organic phase was dried over  $Na_2SO_4$ . After filtration and removal of the solvents under reduced pressure, the residue was purified by flash chromatography (PE/EtOAc 90:10) to afford **8c** (6.336 g, quantitative) as a pale yellow liquid.

$\nu_{max}$  (film)/ $cm^{-1}$  2945, 2893, 2867, 2727, 1743, 1724, 1607, 1584, 1573, 1488, 1464, 1432, 1378, 1256, 1195, 1115, 1060, 1031, 997, 912, 883, 818 and 688;  $\delta_H$  (300 MHz;  $CDCl_3$ ) 1.08 (18H, d,  $J$  = 6.8,  $(CH(CH_3)_2)_3$ ), 1.16-1.28 (3H, m,  $(CH(CH_3)_2)_3$ ), 3.87 (3H, s,  $OCH_3$ ), 6.61 (1H, d,  $J$  = 8.9, ArH3), 7.1 (1H, dd,  $J$  = 8.9 and  $J$  = 3.0, ArH4) and 7.79 (1H, d,  $J$  = 3.0, ArH6);  $\delta_C$  (75 MHz;  $CDCl_3$ ) 12.55 (CH), 17.76 ( $CH_3$ ), 53.41 ( $CH_3$ ), 110.76 (CH), 131.07 (CH), 136.79 (CH), 147.40 (C) and 158.59 (C); GC-MS (retention time: 9.83 min)  $m/z$  (EI) 281 ( $M^{+}$ , 22%), 238 (62), 210 (50), 182 (100) and 168 (58).

**Typical experimental procedure for the formylation of 5-substituted 2-methoxypyridines 8: preparation of 5a and 6a**

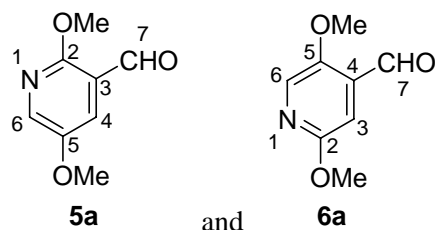

To a solution of 2,5-dimethoxy-pyridine **8a** (417 mg, 3.0 mmol) in anhydrous THF (10 mL) was added diisopropylamine (10  $\mu$ L, 0.06 mmol). The mixture was then cooled to  $-40^{\circ}\text{C}$  and MeLi 1.6 M solution in Et<sub>2</sub>O (3.4 mL, 5.4 mmol) was slowly added. The resulting mixture was stirred at  $0^{\circ}\text{C}$  for 3 hours, then cooled to  $-40^{\circ}\text{C}$  and *N*-formylpiperidine (600  $\mu$ L, 5.4 mmol) was added. The mixture was stirred at  $-40^{\circ}\text{C}$  for 2h then quenched by careful addition of a solution of 37% aqueous HCl (3 mL) in THF (7 mL). The temperature was raised to  $20^{\circ}\text{C}$ , then water (30 mL) and EtOAc (150 mL) were added. The pH of the resulting mixture was then adjusted to 8-9 with solid K<sub>2</sub>CO<sub>3</sub>. After decantation, the aqueous phase was extracted with EtOAc (2 $\times$ 20 mL). After drying of the combined organic phases with Na<sub>2</sub>SO<sub>4</sub> and filtration, the solvents were removed under reduced pressure. The resulting crude product was purified by flash chromatography (PE/EtOAc 96:4 to 80:20).

The less polar fraction was 2,5-dimethoxy-pyridine-3-carbaldehyde **5a** (77 mg, 15% yield, colorless solid).

Mp  $64-66^{\circ}\text{C}$ ; Anal. found C, 57.4; H, 5.5; N, 8.35. C<sub>8</sub>H<sub>9</sub>NO<sub>3</sub> requires C, 57.5; H, 5.4; N, 8.4;  $\nu_{\text{max}}$  (KBr)/cm<sup>-1</sup> 3461, 3055, 2953, 2875, 1679, 1611, 1577, 1488, 1445, 1432, 1411, 1382, 1305, 1290, 1258, 1211, 1172, 1044, 1012, 955, 904, 800, 752 and 737;  $\delta_{\text{H}}$  (300 MHz; CDCl<sub>3</sub>) 3.84 (3H, s, OCH<sub>3</sub>), 4.03 (3H, s, OCH<sub>3</sub>), 7.66 (1H, d,  $J = 3.3$ , ArH), 8.10 (1H, d,  $J = 3.3$ , ArH) and 10.35 (1H, s, CHO);  $\delta_{\text{C}}$  (75 MHz; CDCl<sub>3</sub>) 53.87 (CH<sub>3</sub>), 56.24 (CH<sub>3</sub>), 117.90 (C), 121.01 (CH), 140.52 (CH), 151.35 (C), 159.39 (C) and 189.13 (CH).

The more polar fraction was 2,5-dimethoxy-pyridine-4-carbaldehyde **6a** (279 mg, 56% yield, yellow solid).

Mp  $98-100^{\circ}\text{C}$ ;  $\nu_{\text{max}}$  (KBr)/cm<sup>-1</sup> 3362, 2976, 2914, 1697, 1616, 1563, 1485, 1456, 1446, 1436, 1396, 1381, 1314, 1277, 1242, 1220, 1190, 1040, 1011, 930, 883, 873 and 742;  $\delta_{\text{H}}$  (300 MHz; CDCl<sub>3</sub>) 3.91 (3H, s, OCH<sub>3</sub>), 3.97 (3H, s, OCH<sub>3</sub>), 7.08 (1H, s, ArH), 8.01 (1H, s, ArH) and 10.43 (1H, s, CHO);  $\delta_{\text{C}}$  (75 MHz; CDCl<sub>3</sub>) 53.93 (CH<sub>3</sub>), 56.72 (CH<sub>3</sub>), 107.83 (CH), 131.51 (CH), 133.28 (C), 151.00 (C), 159.12 (C) and 189.15 (CH);  $m/z$  (EI) 167 ( $\text{M}^{+}$ , 100%), 166 (75) and 44 (88); HRMS (EI) found ( $\text{M}^{+}$ ) 167.0580, C<sub>8</sub>H<sub>9</sub>NO<sub>3</sub> requires 167.0582.

**2-Methoxy-5-methoxymethoxy-pyridine-4-carbaldehyde 6b**

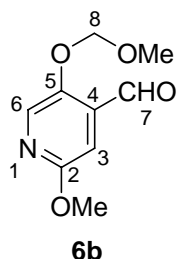

Compound **6b** was prepared according to the same procedure as for compounds **5a/6a**, scale: 2-methoxy-5-methoxymethoxypyridine (1.523 g, 9.0 mmol), THF (30 mL), diisopropylamine (30  $\mu$ L, 0.18 mmol), MeLi 1.6 M in Et<sub>2</sub>O (10.2 mL, 16.2 mmol), *N*-formylpiperidine (1.8 mL, 16.2 mmol). The crude product was purified by flash chromatography (PE/EtOAc 90:10 to 80:20) to afford **6b** (1.083 g, 61%) as a yellow solid.

Mp  $39-40^{\circ}\text{C}$ ;  $\nu_{\text{max}}$  (KBr)/cm<sup>-1</sup> 3369, 2973, 2930, 1739, 1699, 1609, 1486, 1380, 1235, 1195, 1155,

1083, 1032, 986 and 930;  $\delta_{\text{H}}$  (300 MHz;  $\text{CDCl}_3$ ) 3.53 (3H, s,  $\text{OCH}_3$ ), 3.91 (3H, s,  $\text{OCH}_3$ ), 5.25 (2H, s,  $\text{CH}_2\text{OCH}_3$ ), 7.07 (1H, s, ArH), 8.23 (1H, s, ArH), 10.43 (1H, s, CHO);  $\delta_{\text{C}}$  (75 MHz;  $\text{CDCl}_3$ ) 54.10 ( $\text{CH}_3$ ), 56.66 ( $\text{CH}_3$ ), 96.25 ( $\text{CH}_2$ ), 107.64 (CH), 134.28 (C), 136.03 (CH), 148.98 (C), 159.88 (C) and 189.22 (CH);  $m/z$  (CI) 199 (10%), 198 ( $\text{MH}^+$ , 100) and 89 (15); HRMS (CI) found ( $\text{MH}^+$ ) 198.0766,  $\text{C}_9\text{H}_{12}\text{NO}_4$  requires 198.0766.

## 2-Methoxy-5-triisopropylsilyloxy-pyridine-3-carbaldehyde **5c**

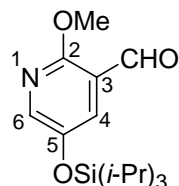

**5c**

Compound **5c** was prepared according to the same procedure as for compounds **5a/6a**, scale: 2-methoxy-5-triisopropylsilyloxypyridine (2.815 g, 10.0 mmol), THF (35 mL), diisopropylamine (30  $\mu\text{L}$ , 0.2 mmol), MeLi 1.5 M in  $\text{Et}_2\text{O}$  (12.0 mL, 18.0 mmol), *N*-formylpiperidine (2.0 mL, 18.0 mmol). The crude product was purified by flash chromatography (PE/EtOAc 98:2 to 96:4) to afford **5c** (1.965 g, 64%) as a yellow oil.

$\nu_{\text{max}}$  (film)/ $\text{cm}^{-1}$  2943, 2893, 2868, 2748, 1742, 1691, 1602, 1569, 1474, 1430, 1383, 1286, 1244, 1211, 1048, 1018, 1003, 910, 882, 844, 801, 755, 690, 665 and 587;  $\delta_{\text{H}}$  (300 MHz;  $\text{CDCl}_3$ ) 1.10 (18H, d,  $J = 6.8$ , ( $\text{CH}(\text{CH}_3)_2$ )<sub>3</sub>), 1.18-1.30 (3H, m, ( $\text{CH}(\text{CH}_3)_2$ )<sub>3</sub>), 4.02 (3H, s,  $\text{OCH}_3$ ), 7.61 (1H, d,  $J = 3.1$ , ArH), 8.04 (1H, d,  $J = 3.1$ , ArH) and 10.32 (1H, s, CHO);  $\delta_{\text{C}}$  (50 MHz;  $\text{CDCl}_3$ ) 12.53 (CH), 17.84 ( $\text{CH}_3$ ), 53.85 ( $\text{CH}_3$ ), 118.29 (C), 127.56 (CH), 144.19 (CH), 147.87 (C), 159.26 (C) and 189.27 (CH);  $m/z$  (CI) 311 (23%) and 310 ( $\text{MH}^+$ , 100); HRMS (CI) found ( $\text{MH}^+$ ) 310.1838,  $\text{C}_{16}\text{H}_{28}\text{NO}_3\text{Si}$  requires 310.1838.

## Typical experimental procedure for the acidic deprotection of **6b**: 5-hydroxy-2-methoxy-pyridine-4-carbaldehyde **9**

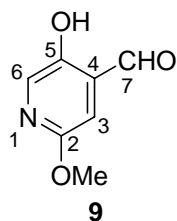

**9**

To a solution of 2-methoxy-5-methoxymethoxy-pyridine-4-carbaldehyde **6b** (986 mg, 5 mmol) in THF (10 mL) was added 3N aqueous HCl (15 mL) and the resulting mixture was stirred at 50°C for 3 hours. After this time, the mixture was cooled to room temperature and water (100 mL) was added followed by neutralisation (pH=7-8) with solid  $\text{K}_2\text{CO}_3$ . The aqueous phase was extracted with EtOAc (3 $\times$ 100 mL). After drying of the organic phase over  $\text{Na}_2\text{SO}_4$ , filtration and removal of the solvents under reduced pressure, the residue was purified by flash chromatography (PE/EtOAc 70:30) to afford **9** (725 mg, 95%) as a yellow powder.

Mp 136-137°C;  $\nu_{\text{max}}$  (KBr)/ $\text{cm}^{-1}$  3436, 2925, 2616, 1691, 1677, 1472, 1449, 1424, 1394, 1324, 1298, 1229, 1119, 1048, 921, 854, 830 and 733;  $\delta_{\text{H}}$  (300 MHz;  $\text{CDCl}_3$ ) 3.93 (3H, s,  $\text{OCH}_3$ ), 6.93 (1H, d,  $J = 0.5$ , ArH3), 8.08 (1H, s, ArH5), 9.46 (1H, s, ArOH) and 9.97 (1H, d,  $J = 0.5$ , CHO);  $\delta_{\text{C}}$  (75 MHz;  $\text{CDCl}_3$ ) 54.16 ( $\text{CH}_3$ ), 111.62 (CH), 127.71 (C), 137.34 (CH), 148.96 (C), 158.35 (C) and 196.58 (CH);  $m/z$  ( $\text{ESI}^+$ ) 186 ( $\text{M}+\text{CH}_3\text{OH}+\text{H}^+$ , 100%), 168 (46) and 154 ( $\text{MH}^+$ , 49); HRMS (EI) found ( $\text{M}^+$ ) 153.0421,  $\text{C}_7\text{H}_7\text{NO}_3$  requires 153.0426.

**Typical experimental procedure for the fluoride-promoted deprotection of **5c**: preparation of 5-hydroxy-2-methoxy-pyridine-3-carbaldehyde **10****

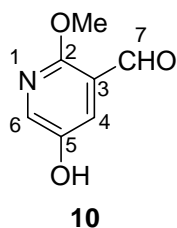

A tetra *n*-butyl-ammonium fluoride 1M solution in THF (15 mL, 15 mmol) was added to a stirred solution of 2-methoxy-5-triisopropylsilanyloxy-pyridine-3-carbaldehyde **5c** (3.095 g, 10 mmol) in anhydrous THF (15 mL) at 0°C. The temperature was allowed to rise to room temperature and the resulting mixture for stirred for 2 hours. After addition of water (15 mL) and EtOAc (50mL) and decantation, the aqueous phase was extracted with EtOAc (2×50 mL). The combined organic phases were washed with water (2×50 mL) and dried over Na<sub>2</sub>SO<sub>4</sub>. After filtration and removal of the solvents under reduced pressure, the residue was purified by flash chromatography (PE/EtOAc 50:50) to afford **10** (1.408 g, 92%) as a white solid.

Mp 104-105°C; Anal. found C, 54.6; H, 4.6; N, 9.05. C<sub>7</sub>H<sub>7</sub>NO<sub>3</sub> requires C, 54.9; H, 4.6; N, 9.15;  $\nu_{\max}$  (KBr)/cm<sup>-1</sup> 3466, 3084, 3007, 2962, 2888, 1674, 1312, 1588, 1483, 1460, 1426, 1390, 1323, 1307, 1283, 1226, 1207, 1170, 1132, 1049, 995, 897, 751 and 743;  $\delta_{\text{H}}$  (300 MHz; CDCl<sub>3</sub>) 4.03 (3H, s, OCH<sub>3</sub>), 5.09 (1H, br s, ArOH), 7.64 (1H, d, *J* = 3.2, ArH), 8.07 (1H, d, *J* = 3.2, ArH) and 10.33 (1H, s, CHO);  $\delta_{\text{C}}$  (50 MHz; CDCl<sub>3</sub>) 54.10 (CH<sub>3</sub>), 118.17 (C), 124.31 (CH), 140.93 (CH), 148.15 (C), 159.29 (C) and 190.22 (CH); *m/z* (ESI<sup>+</sup>) 200 (66%), 186 (M+CH<sub>3</sub>OH+H<sup>+</sup>, 100) and 154 (MH<sup>+</sup>, 59); *m/z* (ESI<sup>-</sup>) 152 (M-H<sup>-</sup>, 100%) and 137 (44).

**Condensation reaction between 3-formyl pyridine **5a** and methyl azidoacetate:**

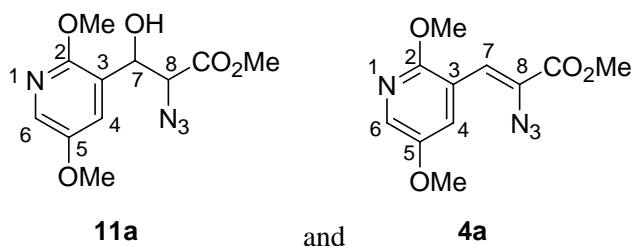

Sodium metal (226 mg, 9.84 mmol) was added to anhydrous methanol (6 mL) at 0°C and the resulting mixture stirred until the metal completely dissolved. To this preformed sodium methoxide solution at 0°C was slowly added (over a 5 min period) a solution in methanol (6 mL) of aldehyde **5a** (401 mg, 2.4 mmol) and methyl azidoacetate (1.055 g, 3.8 mmol). The mixture was stirred at 0°C for 3 hours, then poured onto crushed ice (40 g, in an open beaker) and left for one hour in a refrigerator at 4°C. The product was recovered by filtration on a sintered glass funnel (n°4) and dried under vacuum to give a pale yellow solid (315 mg). This product consisted of a 28:72 mixture (determined by <sup>1</sup>H NMR) of azidoacrylate **4a** and azidoalcohol **11a**, respectively. The crude product was purified by flash chromatography (EP/AcOEt 70:30, the solid was adsorbed onto silica).

*The less polar fraction* was 2-Azido-3-(2,5-dimethoxy-pyridin-3-yl)-acrylic acid methyl ester **4a** (87 mg, pale yellow powder, 14% yield).

Mp 123-124°C;  $\nu_{\max}$  (KBr)/cm<sup>-1</sup> 3088, 2986, 2941, 2853, 2120, 1702, 1611, 1571, 1470, 1440, 1400, 1382, 1347, 1303, 1279, 1261, 1214, 1182, 1146, 1082, 1019 and 962.  $\delta_{\text{H}}$  (300 MHz; DMSO-*d*<sub>6</sub>) 3.81 (3H, s, OCH<sub>3</sub>), 3.86 (3H, s, OCH<sub>3</sub>), 3.87 (3H, s, OCH<sub>3</sub>), 7.03 (1H, s, CH), 7.89 (1H, d, *J* = 3.0, ArH) and 8.13 (1H, d, *J* = 3.0, ArH);  $\delta_{\text{C}}$  (75 MHz; DMSO-*d*<sub>6</sub>) 53.26 (CH<sub>3</sub>), 53.76 (CH<sub>3</sub>), 56.21 (CH<sub>3</sub>), 115.70 (C), 116.01 (CH), 125.33 (CH), 127.33 (C), 132.66 (CH), 150.40 (C), 155.22 (C) and 162.97 (C); *m/z* (CI) 265 (MH<sup>+</sup>, 31%), 238 (14) and 237 (MH<sup>+</sup>-N<sub>2</sub>, 100); HRMS (CI) found (MH<sup>+</sup>) 265.0938, C<sub>11</sub>H<sub>13</sub>N<sub>4</sub>O<sub>4</sub> requires 265.0937.

The more polar fraction was 2-Azido-3-(2,5-dimethoxy-pyridin-3-yl)-3-hydroxy-propionic acid methyl ester **11a** (205 mg, white powder, 20% yield).

Mp 145-146°C;  $\nu_{\max}$  (KBr)/cm<sup>-1</sup> 3413, 3153, 2965, 2935, 2130, 2098, 1742, 1589, 1484, 1435, 1405, 1351, 1274, 1295, 1214, 1250, 1205, 1068, 1043, 1014, 1008, 947 and 817;  $\delta_{\text{H}}$  (300 MHz; DMSO-d<sub>6</sub>) 3.78 (3H, s, OCH<sub>3</sub>), 3.79 (3H, s, OCH<sub>3</sub>), 3.84 (3H, s, OCH<sub>3</sub>), 4.17 (1H, d,  $J$  = 2.3, CHN<sub>3</sub>), 5.31 (1H, dd,  $J$  = 5.0 and  $J$  = 2.3, CHOH), 6.23 (1H, d,  $J$  = 5.0, disappears after D<sub>2</sub>O addition, OH), 7.46 (1H, d,  $J$  = 3.0, ArH), 7.80 (1H, d,  $J$  = 3.0, ArH);  $\delta_{\text{C}}$  (75 MHz; DMSO-d<sub>6</sub>) 52.70 (CH<sub>3</sub>), 53.39 (CH<sub>3</sub>), 56.04 (CH<sub>3</sub>), 63.95 (CH), 68.53 (CH), 124.08 (CH), 124.30 (C), 129.58 (CH), 151.08 (C), 153.56 (C) and 169.09 (C);  $m/z$  (CI) 283 (MH<sup>+</sup>, 32%), 265 (MH<sup>+</sup>-H<sub>2</sub>O, 25), 168 (100) and 88 (37); HRMS (CI) found (MH<sup>+</sup>) 283.1044, C<sub>11</sub>H<sub>15</sub>N<sub>4</sub>O<sub>5</sub> requires 283.1042.

**Typical experimental procedure for the preparation of azidoacrylates: 2-Azido-3-(2,5-dimethoxy-pyridin-3-yl)-acrylic acid methyl ester 4a**

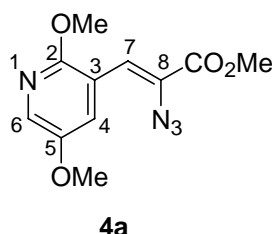

Sodium metal (189 mg, 8.2 mmol) was added to anhydrous methanol (4 mL) at 0°C and the resulting mixture was stirred until the metal completely dissolved. To this preformed sodium methoxide solution at 30°C was quickly added (in 30 seconds) a solution of aldehyde **5a** (335 mg, 2.0 mmol) and methyl azidoacetate (1.055 g, 7.6 mmol) in methanol (6 mL). The mixture was stirred at 30°C for 2 hours, then poured onto crushed ice (40 g, in an open beaker) and left for one hour in a refrigerator at 4°C. The product was recovered by filtration on a sintered glass funnel (n°4) and dried under vacuum to afford **4a** (315 mg, 57%) as an off-white powder.

**2-Azido-3-(2,5-dimethoxy-pyridin-4-yl)-acrylic acid methyl ester 4b**

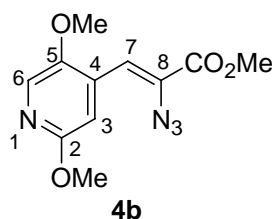

Compound **4b** was prepared according to the same procedure as for compound **4a**, scale: sodium metal (189 mg, 8.2 mmol), anhydrous methanol (4 mL), methanol (6 mL), aldehyde (335 mg, 2 mmol), methyl azidoacetate (875 mg, 7.6 mmol). (268 mg, 51%, yellow powder).

Mp 117-118°C (decomposed);  $\nu_{\max}$  (KBr)/cm<sup>-1</sup> 3439, 3108, 2946, 2925, 2851, 2127, 1716, 1602, 1548, 1487, 1463, 1435, 1384, 1322, 1281, 1254, 1214, 1189, 1082, 1044, 1014, 888 and 739;  $\delta_{\text{H}}$  (300 MHz; acetone-d<sub>6</sub>) 3.84 (3H, s, OCH<sub>3</sub>), 3.92 (3H, s, OCH<sub>3</sub>), 3.93 (3H, s, OCH<sub>3</sub>), 7.12 (1H, s, CH), 7.50 (1H, s, ArH), 7.89 (1H, s, ArH);  $\delta_{\text{C}}$  (75 MHz; acetone-d<sub>6</sub>) 53.58 (CH<sub>3</sub>), 53.62 (CH<sub>3</sub>), 57.15 (CH<sub>3</sub>), 111.07 (CH), 116.05 (CH), 130.32 (CH), 130.53 (C), 133.25 (C), 149.30 (C), 159.41 (C) and 164.00 (C);  $m/z$  (EI) 264 (M<sup>+</sup>•, 53%), 204 (49), 177 (58), 64 (54) and 59 (100); HRMS (EI) found (M<sup>+</sup>•) 264.0856, C<sub>11</sub>H<sub>12</sub>N<sub>4</sub>O<sub>4</sub> requires 264.0859.

#### 4,7-Dimethoxy-1H-pyrrolo[3,2-c]pyridine-2-carboxylic acid methyl ester **2a**

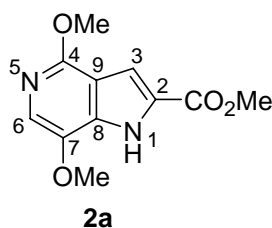

The reaction was carried out in a 100 mL round-bottom flask, open to the atmosphere *via* a condenser and an addition funnel.

To hot xylene (13 mL) at 140°C was slowly added with vigorous stirring a suspension of acrylate **4a** (423 mg, 1.6 mmol) in xylene (27 mL). Once the addition was complete, the mixture was stirred for 1 hour at 140°C, then slowly cooled down to room temperature overnight without stirring. After the complete crystallisation of the solid, the supernatant was removed and the solid dried under high vacuum to give 5-azaindole **2a** (310 mg, 82%) as pale pink crystals.

Mp 192-193°C; Anal. found C, 55.8; H, 5.3; N, 11.65. C<sub>11</sub>H<sub>12</sub>N<sub>2</sub>O<sub>4</sub> requires C, 55.95; H, 5.1; N, 11.85;  $\nu_{\max}$  (KBr)/cm<sup>-1</sup> 3437, 3300, 2948, 2924, 1702, 1619, 1593, 1537, 1499, 1465, 1446, 1429, 1360, 1307, 1258, 1208, 1157, 1098, 1087, 984, 853 and 754;  $\delta_{\text{H}}$  (300 MHz; DMSO-d<sub>6</sub>) 3.84 (3H, s, OCH<sub>3</sub>), 3.90 (3H, s, OCH<sub>3</sub>), 3.92 (3H, s, OCH<sub>3</sub>), 7.10 (1H, s, ArH), 7.47 (1H, s, ArH) and 12.57 (1H, br s, NH);  $\delta_{\text{C}}$  (75 MHz; DMSO-d<sub>6</sub>) 51.89 (CH<sub>3</sub>), 52.79 (CH<sub>3</sub>), 56.37 (CH<sub>3</sub>), 106.53 (CH), 112.95 (C), 120.41 (CH), 127.46 (C), 134.17 (C), 140.04 (C), 152.78 (C) and 160.91 (C);  $m/z$  (CI) 238 (12%) and 237 (MH<sup>+</sup>, 100); HRMS (CI) found (MH<sup>+</sup>) 237.0874, C<sub>11</sub>H<sub>13</sub>N<sub>2</sub>O<sub>4</sub> requires 237.0875.

#### 4,7-Dimethoxy-1H-pyrrolo[2,3-c]pyridine-2-carboxylic acid methyl ester **2c**

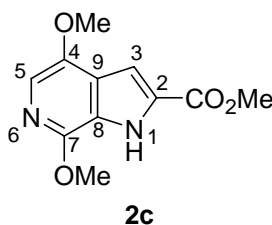

The reaction was carried out in a 50 mL round-bottom flask, open to the atmosphere *via* a condenser and an addition funnel.

To hot xylene (8 mL) at 140°C was slowly added with vigorous stirring a solution of acrylate **4b** (264 mg, 1.0 mmol) in xylene (16 mL). Once the addition was complete, the mixture was stirred for 1 hour at 140°C, then cooled down to room temperature over 4 hours and held in a freezer at -20°C overnight. The supernatant was removed and the solid dried under high vacuum to give 6-azaindole **2c** (73 mg, 31%) as a pale yellow powder. The supernatant was purified by flash chromatography (PE/EtOAc 50:50) to afford **2c** (61 mg, 26%) as a pale yellow powder; global yield = 57%.

Mp 169-170°C;  $\nu_{\max}$  (KBr)/cm<sup>-1</sup> 3306, 2994, 2939, 1713, 1511, 1470, 1448, 1340, 1320, 1288, 1234, 1202, 1097, 992, 827 and 747;  $\delta_{\text{H}}$  (300 MHz; DMSO-d<sub>6</sub>) 3.86 (3H, s, OCH<sub>3</sub>), 3.88 (3H, s, OCH<sub>3</sub>), 3.96 (3H, s, OCH<sub>3</sub>), 7.07 (1H, s, ArH), 7.27 (1H, s, ArH) and 12.62 (1H, br s, NH);  $\delta_{\text{C}}$  (75 MHz; DMSO-d<sub>6</sub>) 52.03 (CH<sub>3</sub>), 52.81 (CH<sub>3</sub>), 55.86 (CH<sub>3</sub>), 104.90 (CH), 114.66 (CH), 123.03 (C), 124.81 (C), 128.96 (C), 145.67 (C), 146.37 (C) and 160.98 (C);  $m/z$  (EI) 236 (M<sup>+</sup>•, 100%), 221 (M<sup>+</sup>•-CH<sub>3</sub>•, 7), 204 (M<sup>+</sup>•-CH<sub>3</sub>OH, 53), 189 (M<sup>+</sup>•-CH<sub>3</sub>OH-CH<sub>3</sub>•, 54); HRMS (EI) found (M<sup>+</sup>•) 236.0798, C<sub>11</sub>H<sub>12</sub>N<sub>2</sub>O<sub>4</sub> requires 236.0797.

### 1-Benzyl-4,7-dimethoxy-1*H*-pyrrolo[3,2-*c*]pyridine-2-carboxylic acid methyl ester **2b**

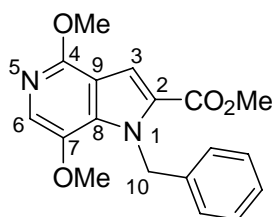

**2b**

To a solution of 5-azaindole **2a** (100 mg, 0.42 mmol) in DMF (3 mL) at room temperature, was added in one portion sodium hydride (60% dispersion in mineral oil, 20 mg, 0.50 mmol). The mixture was heated to 50°C and stirred for 3h30. Benzyl bromide (50  $\mu$ L, 0.42 mmol) was then added and the resulting mixture stirred for an additional two hours at 50°C. After cooling down to room temperature, water (10 mL) was added and the aqueous phase extracted with EtOAc (3 $\times$ 20 mL). The organic phases were dried over Na<sub>2</sub>SO<sub>4</sub>, filtered and the solvents removed under reduced pressure. The resulting crude product was purified by flash chromatography (PE/EtOAc 70:30) to afford compound **2b** (101 mg, 74%) as a white powder.

Mp 121-122°C;  $\nu_{\text{max}}$  (KBr)/cm<sup>-1</sup> 3435, 3028, 3008, 2940, 1712, 1657, 1606, 1520, 1483, 1452, 1437, 1400, 1362, 1312, 1269, 1234, 1203, 1101, 1066, 1011, 985, 857, 749 and 727;  $\delta_{\text{H}}$  (300 MHz; DMSO-*d*<sub>6</sub>) 3.79 (3H, s, OCH<sub>3</sub>), 3.82 (3H, s, OCH<sub>3</sub>), 3.94 (3H, s, OCH<sub>3</sub>), 6.04 (2H, s, CH<sub>2</sub>Ph), 6.93 (2H, d, *J* = 7.0, CH<sub>2</sub>*o*-ArH), 7.17-7.29 (3H, m, CH<sub>2</sub>ArH), 7.30 (1H, s, ArH) and 7.54 (1H, s, ArH);  $\delta_{\text{C}}$  (75 MHz; DMSO-*d*<sub>6</sub>) 49.31 (CH<sub>2</sub>), 51.97 (CH<sub>3</sub>), 52.96 (CH<sub>3</sub>), 56.64 (CH<sub>3</sub>), 109.44 (CH), 111.93 (C), 121.96 (CH), 125.93 (CH), 126.98 (CH), 127.02 (C), 128.49 (CH), 134.47 (C), 139.19 (C), 140.48 (C), 153.08 (C) and 160.85 (C); *m/z* (ESI<sup>+</sup>) 328 (19%), 327 (MH<sup>+</sup>, 100); HRMS (ESI<sup>+</sup>) found (MH<sup>+</sup>) 327.1347, C<sub>18</sub>H<sub>19</sub>N<sub>2</sub>O<sub>4</sub> requires 327.1345.

### Experimental procedure for the oxidation of 4,7-dimethoxy 5-azaindole **2a**: 4,6,7-Trioxo-4,5,6,7-tetrahydro-1*H*-pyrrolo[3,2-*c*]pyridine-2-carboxylic acid methyl ester **12a**

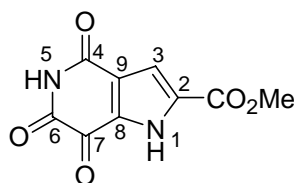

**12a**

To a solution of 5-azaindole **2a** (47 mg, 0.2 mmol) in a 1:1 acetonitrile/water mixture (16 mL) at room temperature was added in one portion [Bis(trifluoroacetoxy)iodo]benzene (PIFA) (86 mg, 0.2 mmol). After stirring for one hour, a further portion of PIFA (86 mg, 0.2 mmol) was added. This procedure was repeated twice more, after 2h and 3h reaction time, so that a total of four equivalents (344 mg, 0.8 mmol) of PIFA were used. One hour after the last PIFA addition, the mixture was filtered on a sintered glass funnel filled with a one cm thick pad of silica gel, washing with EtOAc. After evaporation of the filtrate under reduced pressure, the residue was purified by flash chromatography (petroleum ether / EtOAc 50:50) to afford a pink solid. This solid was then washed with dichloromethane to give the trioxo compound **12a** (43 mg, 97%) as a pale yellow solid.

Mp 269-270°C;  $\nu_{\text{max}}$  (KBr)/cm<sup>-1</sup> 3210, 3137, 2924, 2853, 1690, 1554, 1455, 1432, 1287, 1229, 1138, 1096, 974, 927 and 799;  $\delta_{\text{H}}$  (300 MHz; DMSO-*d*<sub>6</sub>) 3.85 (3H, s, OCH<sub>3</sub>), 7.16 (1H, s, H3), 11.54 (1H, s, H5) and 14.00 (1H, br s, H1);  $\delta_{\text{C}}$  (75 MHz; DMSO-*d*<sub>6</sub>) 52.38 (CH<sub>3</sub>), 113.25 (CH), 123.89 (C), 130.32 (C), 132.77 (C), 158.70 (C), 159.95 (C), 160.69 (C) and 166.45 (C); *m/z* (ESI<sup>+</sup>) 463 (48%), 445 (54), 427.1 (2M+H<sup>+</sup>, 29), 222.9 (MH<sup>+</sup>, 100), 209 (24); HRMS (ESI<sup>+</sup>) found (M+Na<sup>+</sup>) 245.0174, C<sub>9</sub>H<sub>6</sub>N<sub>2</sub>O<sub>5</sub>Na requires 245.0174.

The monocystal for the X-ray diffraction analysis was obtained as follows: a solution of



compound **12a** (1 mg) in acetone (0.7 mL) was allowed to stand for three days at room temperature (20°C) in a test tube (without capping). A colorless needle (0.06 × 0.07 × 0.21 mm) was then analyzed on a Nonius Kappa CCD diffractometer at 293K. The crystal structure data of compound **12a** has been deposited at the Cambridge Crystallographic Data Centre (CCDC 641655).

#### Crystal data

|                         |                                    |
|-------------------------|------------------------------------|
| $C_9H_6N_2O_5$          | $V = 458.78 (1) \text{ \AA}^3$     |
| $M_r = 222.16$          | $Z = 2$                            |
| Triclinic, $P-1$        | $D_x = 1.608 \text{ Mg m}^{-3}$    |
| $a = 5.35 \text{ \AA}$  | Mo $K\alpha$ radiation             |
| $b = 8.79 \text{ \AA}$  | Cell parameters from 0 reflections |
| $c = 10.58 \text{ \AA}$ | $\theta = 0-0^\circ$               |
| $\alpha = 111.47^\circ$ | $\mu = 0.14 \text{ mm}^{-1}$       |
| $\beta = 94.77^\circ$   | $T = 293 \text{ K}$                |
| $\gamma = 94.31^\circ$  | Needle, colorless                  |

#### Data collection

|                                                  |                                          |
|--------------------------------------------------|------------------------------------------|
| Nonius KappaCCD diffractometer                   | 1005 reflections with $I > 2.0\sigma(I)$ |
| $\phi$ & $\omega$ scans                          | $R_{\text{int}} = 0.042$                 |
| Absorption correction: none                      | $\theta_{\text{max}} = 27.7^\circ$       |
| $T_{\text{min}} = 0.991, T_{\text{max}} = 0.992$ | $h = -7 \rightarrow 6$                   |
| 3192 measured reflections                        | $k = -11 \rightarrow 11$                 |
| 2078 independent reflections                     | $l = -13 \rightarrow 13$                 |

#### Refinement

|                                 |                                                                                                                                                                                                                                                                                                                                                                                               |
|---------------------------------|-----------------------------------------------------------------------------------------------------------------------------------------------------------------------------------------------------------------------------------------------------------------------------------------------------------------------------------------------------------------------------------------------|
| Refinement on $F$               | H atoms constrained to parent site                                                                                                                                                                                                                                                                                                                                                            |
| $R[F^2 > 2\sigma(F^2)] = 0.047$ | Calculated weights Method, part 1, Chebychev polynomial, (Watkin, 1994, Prince, 1982) $[\text{weight}] = 1.0/[A_0 * T_0(x) + A_1 * T_1(x) \dots + A_{n-1} * T_{n-1}(x)]$ where $A_i$ are the Chebychev coefficients listed below and $x = F/F_{\text{max}}$ Method = Robust Weighting (Prince, 1982) $W = [\text{weight}] * [1 - (\Delta F / 6 * \sigma F)^2]^2$ $A_i$ are: 0.603 0.477 0.354 |
| $wR(F^2) = 0.057$               | $(\Delta/\sigma)_{\text{max}} < 0.0001$                                                                                                                                                                                                                                                                                                                                                       |
| $S = 1.06$                      | $\Delta\rho_{\text{max}} = 0.20 \text{ e \AA}^{-1}$                                                                                                                                                                                                                                                                                                                                           |
| 1005 reflections                | $\Delta\rho_{\text{min}} = -0.20 \text{ e \AA}^{-1}$                                                                                                                                                                                                                                                                                                                                          |
| 145 parameters                  | Extinction correction: None                                                                                                                                                                                                                                                                                                                                                                   |

*Geometric parameters (Å, °) for CRYSTALS cif*

|         |           |        |           |
|---------|-----------|--------|-----------|
| O1—C10  | 1.203 (4) | O7—C9  | 1.305 (4) |
| C13—N4  | 1.354 (4) | O7—C12 | 1.450 (4) |
| C13—C7  | 1.385 (4) | N4—C11 | 1.374 (4) |
| C13—C10 | 1.439 (4) | C5—C7  | 1.401 (4) |
| N3—C6   | 1.397 (4) | C5—C11 | 1.379 (4) |
| N3—C8   | 1.362 (4) | C6—C7  | 1.457 (4) |
| O4—C8   | 1.213 (3) | C8—C10 | 1.556 (4) |
| O2—C6   | 1.210 (3) | C9—C11 | 1.476 (5) |
| O5—C9   | 1.216 (4) |        |           |

|            |           |            |           |
|------------|-----------|------------|-----------|
| N4—C13—C7  | 108.7 (3) | N3—C8—O4   | 123.0 (3) |
| N4—C13—C10 | 127.4 (3) | N3—C8—C10  | 117.5 (3) |
| C7—C13—C10 | 123.9 (3) | O4—C8—C10  | 119.6 (3) |
| C6—N3—C8   | 127.8 (3) | O7—C9—O5   | 125.1 (3) |
| C9—O7—C12  | 116.1 (3) | O7—C9—C11  | 112.2 (3) |
| C13—N4—C11 | 107.9 (3) | O5—C9—C11  | 122.6 (3) |
| C7—C5—C11  | 106.2 (3) | C8—C10—C13 | 114.1 (3) |
| N3—C6—O2   | 119.7 (3) | C8—C10—O1  | 118.9 (3) |
| N3—C6—C7   | 115.1 (3) | C13—C10—O1 | 127.0 (3) |
| O2—C6—C7   | 125.1 (3) | C9—C11—C5  | 131.4 (3) |
| C6—C7—C5   | 130.7 (3) | C9—C11—N4  | 119.1 (3) |
| C6—C7—C13  | 121.5 (3) | C5—C11—N4  | 109.4 (3) |
| C5—C7—C13  | 107.8 (3) |            |           |

*Hydrogen-bond parameters (Å, °) for CRYSTALS cif*

|                          | <i>D</i> —H | H... <i>A</i> | <i>D</i> ... <i>A</i> | <i>D</i> —H... <i>A</i> |
|--------------------------|-------------|---------------|-----------------------|-------------------------|
| N4—H1...O5 <sup>i</sup>  | 0.85        | 2.00          | 2.843 (2)             | 170                     |
| N3—H2...O4 <sup>ii</sup> | 0.88        | 2.05          | 2.924 (2)             | 174                     |

Symmetry codes: (i) 1-x, 1-y, 1-z; (ii) -1-x, 1-y, 2-z.

**Experimental procedure for the oxidation of 7-hydroxy 4-methoxy 5-azaindole 3a: Preparation of compound 12a.**

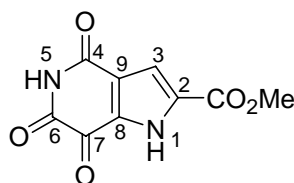

**12a**

To a solution of 5-azaindole **3a** (22 mg, 0.1 mmol) in a 1:1 acetonitrile/water mixture (8 mL) at room temperature was added in one portion [Bis(trifluoroacetoxy)iodo]benzene (PIFA) (44 mg, 0.1 mmol). After stirring for one hour, the resulting mixture was filtered off on a sintered glass funnel filled with a one cm thick pad of silica gel, washing with EtOAc. After evaporation of the filtrate under reduced pressure, the residue was purified by flash chromatography (PE/EtOAc 50:50) to afford the trioxo compound **12a** (19 mg, 95%) as an orange solid.

**Typical experimental procedure for the oxidation of *N*-benzyl 4,7-dimethoxy 5-azaindole **2b**: Preparation of 1-Benzyl-4,6,7-trioxo-4,5,6,7-tetrahydro-1*H*-pyrrolo[3,2-*c*]pyridine-2-carboxylic acid methyl ester **12b****

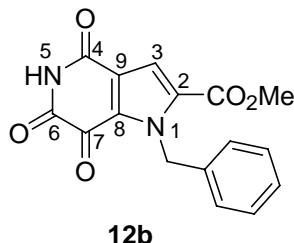

To a solution of *N*-benzyl 5-azaindole **2b** (68 mg, 0.21 mmol) in a 1:1 acetonitrile/water mixture (23 mL) at room temperature was added in one portion [Bis(trifluoroacetoxy)iodo]benzene (PIFA) (359 mg, 0.84 mmol). After stirring for four hours, the resulting mixture was filtered off on a sintered glass funnel filled with a one cm thick pad of silica gel, washing with EtOAc. After evaporation of the filtrate under reduced pressure, the residue was purified by flash chromatography (PE/EtOAc 70:30) to afford compound **12b** (53 mg, 81%) as a pale brown solid. Mp 208-209°C;  $\nu_{\max}$  (KBr)/cm<sup>-1</sup> 3205, 3120, 2924, 2853, 1728, 1710, 1674, 1526, 1489, 1454, 1425, 1382, 1255, 1186, 1119, 1078, 945, 737 and 707;  $\delta_{\text{H}}$  (300 MHz; DMSO-*d*<sub>6</sub>) 3.79 (3H, s, OCH<sub>3</sub>), 5.99 (2H, s, CH<sub>2</sub>Ph), 7.13 (2H, d, *J* = 6.4, CH<sub>2o</sub>-Ar*H*), 7.25-7.30 (3H, m, CH<sub>2</sub>Ar*H*), 7.32 (1H, s, H3) and 11.70 (1H, s, H5);  $\delta_{\text{C}}$  (75 MHz; DMSO-*d*<sub>6</sub>) 49.73 (CH<sub>2</sub>), 52.50 (CH<sub>3</sub>), 115.27 (CH), 123.45 (C), 126.66 (CH), 127.43 (CH), 128.47 (CH), 129.52 (C), 132.00 (C), 136.79 (C), 158.52 (C), 159.74 (C), 160.26 (C) and 167.13 (C); *m/z* (ESI<sup>+</sup>) 648 (32%), 647 (2M+Na<sup>+</sup>, 100), 335 (M+Na<sup>+</sup>, 11), 313 (MH<sup>+</sup>, 8); HRMS (ESI<sup>+</sup>) found (M+Na<sup>+</sup>) 335.0647, C<sub>16</sub>H<sub>12</sub>N<sub>2</sub>O<sub>5</sub>Na requires 335.0644.

**Preparation of compound **12c** from 4,7-dimethoxy 6-azaindole **2c**: 4,5,7-Trioxo-4,5,6,7-tetrahydro-1*H*-pyrrolo[2,3-*c*]pyridine-2-carboxylic acid methyl ester **12c****

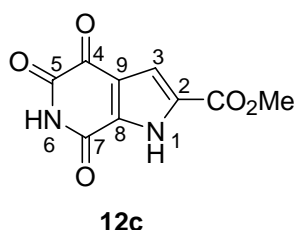

Compound **12c** was prepared according to the same procedure as for compound **12b**, scale: 6-azaindole **2c** (50 mg, 0.21 mmol), [Bis(trifluoroacetoxy)iodo]benzene (PIFA) (365 mg, 0.85 mmol), 1:1 acetonitrile/water mixture (16 mL). The crude product was purified by flash chromatography (PE/EtOAc 50:50) to afford **12c** (27 mg, 57%) as a yellow powder. Mp 261-262°C;  $\nu_{\max}$  (KBr)/cm<sup>-1</sup> 3436, 3203, 3124, 2925, 2854, 1691, 1561, 1503, 1483, 1425, 1395, 1331, 1276, 1234, 1140, 1101, 990, 932, 809 and 774;  $\delta_{\text{H}}$  (300 MHz; DMSO-*d*<sub>6</sub>) 3.84 (3H, s, OCH<sub>3</sub>), 7.18 (1H, s, H3), 11.73 (1H, br s, H6) and 14.06 (1H, very br s, H1);  $\delta_{\text{C}}$  (75 MHz; DMSO-*d*<sub>6</sub>) 52.21 (CH<sub>3</sub>), 112.51 (CH), 124.31 (C), 129.69 (C), 132.73 (C), 157.28 (C), 159.22 (C), 160.20 (C) and 171.10 (C); *m/z* (ESI<sup>+</sup>) 468 (22%), 467 (2M+Na<sup>+</sup>, 100), 245 (M+Na<sup>+</sup>, 15); *m/z* (ESI<sup>-</sup>) for C<sub>9</sub>H<sub>5</sub>N<sub>2</sub>O<sub>5</sub> 221 (M-H<sup>-</sup>, 100%); HRMS (ESI<sup>+</sup>) found (M+Na<sup>+</sup>) 245.0177, C<sub>9</sub>H<sub>6</sub>N<sub>2</sub>O<sub>5</sub>Na requires 245.0174.

### Preparation of compound 12c from 4-hydroxy 7-methoxy 6-azaindole 3c.

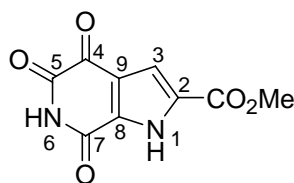

**12c**

Compound **12c** was also prepared according to the same procedure as for compound **12a** (from 7-hydroxy 4-methoxy 5-azaindole **3a**), scale: 6-azaindole **3c** (30 mg, 0.134 mmol), [Bis(trifluoroacetoxy)iodo]benzene PIFA (59 mg, 0.137 mmol), 1:1 acetonitrile/water mixture (8 mL). The crude product was purified by flash chromatography (PE/EtOAc 40:60) to afford **12c** (29.5 mg, 99%) as an orange powder.

### Typical experimental procedure for the BBr<sub>3</sub> monodemethylation of 4,7-dimethoxy azaindole 2a: preparation of 7-hydroxy-4-methoxy 5-azaindole 7-Hydroxy-4-methoxy-1H-pyrrolo[3,2-c]pyridine-2-carboxylic acid methyl ester 3a

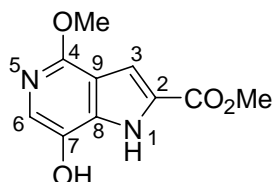

**3a**

To a cooled (-78°C) solution of dimethoxy 5-azaindole **2a** (25 mg, 0.10 mmol) in dichloromethane (2 mL) was added dropwise a 1M solution of BBr<sub>3</sub> in dichloromethane (535 µL, 0.53 mmol). The mixture was then stirred at room temperature for 16 hours. Methanol (2 mL) was added dropwise and the solvent was removed *in vacuo*. Water (4 mL) was added to the residue and the pH of this solution was carefully adjusted to pH=7 (controlled with a calibrated pH meter) with 0.5 M sodium hydroxide solution. The aqueous phase was extracted with EtOAc (3×10 mL) and, after drying over Na<sub>2</sub>SO<sub>4</sub>, the solvent was removed under reduced pressure. The resulting crude product was purified by flash chromatography (PE/Et<sub>2</sub>O 20:80) to afford compound **3a** (13.5 mg, 57%) as a yellow solid.

Mp 183-184°C (decomposed);  $\nu_{\max}$  (KBr)/cm<sup>-1</sup> 3315, 2924, 2854, 1711, 1628, 1601, 1541, 1497, 1442, 1389, 1327, 1278, 1208, 1161, 1093, 1071, 989, 936, 829, 749 and 708;  $\delta_{\text{H}}$  (300 MHz; DMSO-d<sub>6</sub>) 3.86 (3H, s, OCH<sub>3</sub>), 3.88 (3H, s, OCH<sub>3</sub>), 7.09 (1H, s, ArH), 7.34 (1H, s, ArH), 9.28 (1H, br s, ArOH) and 12.07 (1H, br s, NH);  $\delta_{\text{C}}$  (50 MHz; DMSO-d<sub>6</sub>) 51.90 (CH<sub>3</sub>), 52.62 (CH<sub>3</sub>), 106.34 (CH), 113.10 (C), 122.95 (CH), 126.84 (C), 133.98 (C), 136.70 (C), 151.77 (C) and 161.02 (C);  $m/z$  (CI) 223 (MH<sup>+</sup>, 100%), 85 (10), 79 (20); HRMS (CI) found (MH<sup>+</sup>) 223.0720, C<sub>10</sub>H<sub>11</sub>N<sub>2</sub>O<sub>4</sub> requires 223.0719.

### Preparation of 4-hydroxy-7-methoxy 6-azaindole 3c from monodemethylation of 4,7-dimethoxy azaindole 2c. 4-Hydroxy-7-methoxy-1H-pyrrolo[2,3-c]pyridine-2-carboxylic acid methyl ester 3c

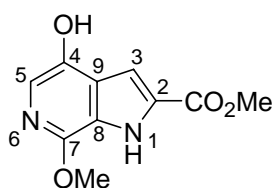

**3c**

Compound **3c** was prepared according to the same procedure as for compound **3a**, scale: 6-azaindole **2c** (25 mg, 0.10 mmol), dichloromethane (2 mL), 1M solution BBr<sub>3</sub> in CH<sub>2</sub>Cl<sub>2</sub> (266  $\mu$ L, 0.26 mmol). The crude product was purified by flash chromatography (PE/Et<sub>2</sub>O 30:70) to afford **3c** (13 mg, 55%) as a yellow powder.

Mp 203-204°C (decomposed);  $\nu_{\max}$  (KBr)/cm<sup>-1</sup> 3325, 2924, 2852, 1709, 1512, 1449, 1413, 1333, 1262, 1199, 1090, 1063, 820, 776 and 747;  $\delta_{\text{H}}$  (300 MHz; DMSO-d<sub>6</sub>) 3.86 (3H, s, OCH<sub>3</sub>), 3.92 (3H, s, OCH<sub>3</sub>), 7.16 (1H, s, ArH), 7.17 (1H, s, ArH), 9.41 (1H, s, ArOH) and 12.42 (1H, br s, NH);  $\delta_{\text{C}}$  (75 MHz; DMSO-d<sub>6</sub>) 51.98 (CH<sub>3</sub>), 52.65 (CH<sub>3</sub>), 105.52 (CH), 117.58 (CH), 123.21 (C), 124.88 (C), 128.48 (C), 143.11 (C), 145.19 (C) and 161.13 (C);  $m/z$  (ESI<sup>+</sup>) 223 (MH<sup>+</sup>, 100%), 209 (24), 191 (23);  $m/z$  (ESI<sup>-</sup>) 425 (100%), 237 (27), 221 (M-H<sup>-</sup>, 30); HRMS (ESI<sup>+</sup>) found (MH<sup>+</sup>) 223.0717, C<sub>10</sub>H<sub>11</sub>N<sub>2</sub>O<sub>4</sub> requires 223.0719.

## 2-Azido-3-(2-methoxy-5-triisopropylsilanyloxy-pyridin-3-yl)-acrylic acid methyl ester **13**

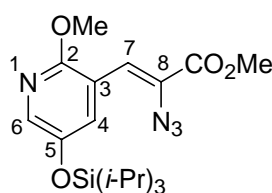

**13**

Sodium metal (540 mg, 23.5 mmol) was dissolved in anhydrous methanol (17 mL) at 0°C under argon. To this preformed sodium methoxide solution at 0°C was quickly added a solution of aldehyde **5c** (1.77 g, 5.7 mmol) and methyl azidoacetate (2.50 g, 21.7 mmol) in methanol (17 mL). The mixture was stirred at 25°C for two hours, then poured onto crushed ice (120 g) and held for one hour at 4°C. After addition of dichloromethane (100 mL) and decantation, the aqueous phase was extracted with dichloromethane (3×150 mL). The organic phases were washed with water (2×150 mL) and dried over Na<sub>2</sub>SO<sub>4</sub>. After filtration and removal of the solvent under reduced pressure, the residue was purified by flash chromatography (PE/EtOAc 70:30) to afford acrylate **13** (457 mg, 20%) as an orange solid.

Mp 61-63°C (decomposed);  $\nu_{\max}$  (KBr)/cm<sup>-1</sup> 3409, 3093, 2946, 2892, 2867, 2123, 1716, 1612, 1589, 1564, 1468, 1437, 1425, 1403, 1379, 1290, 1277, 1260, 1227, 1141, 1086, 1026, 1009, 901, 883, 864, 834, 748, 740 and 692;  $\delta_{\text{H}}$  (300 MHz; CDCl<sub>3</sub>) 1.12 (18H, br d,  $J$  = 6.8, (CH(CH<sub>3</sub>)<sub>2</sub>)<sub>3</sub>), 1.26 (3H, m, (CH(CH<sub>3</sub>)<sub>2</sub>)<sub>3</sub>), 3.91 (3H, s, OCH<sub>3</sub>), 3.94 (3H, s, OCH<sub>3</sub>), 7.18 (1H, s, CH), 7.77 (1H, d,  $J$  = 3.0, ArH) and 8.15 (1H, d,  $J$  = 3.0, ArH);  $\delta_{\text{C}}$  (50 MHz; CDCl<sub>3</sub>) 12.57 (CH), 17.87 (CH<sub>3</sub>), 52.99 (CH<sub>3</sub>), 53.79 (CH<sub>3</sub>), 116.23 (C), 117.98 (CH), 126.66 (C), 130.30 (CH), 138.23 (CH), 147.08 (C), 156.00 (C) and 163.80 (C);  $m/z$  (ESI) 407 (MH<sup>+</sup>, 12%), 380 (23), 379 (MH<sup>+</sup>-N<sub>2</sub>, 100).

## 4-Methoxy-7-triisopropylsilanyloxy-1H-pyrrolo[3,2-c]pyridine-2-carboxylic acid methyl ester **14**

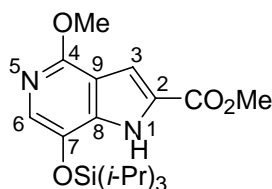

**14**

A solution of azidoacrylate **13** (369 mg, 0.9 mmol) in dry xylene (32 mL) was added dropwise onto hot (140°C) xylene (18 mL). After addition, the mixture was heated at 140°C for one hour and then cooled down to room temperature. The xylene solution was then chromatographed over silica gel (eluent PE/EtOAc 90:10) to give 5-azaindole **14** (266 mg, 77%) as a pale yellow solid.

Mp 134-135°C;  $\nu_{\max}$  (KBr)/cm<sup>-1</sup> 3423, 3114, 2969, 2943, 2866, 1723, 1606, 1546, 1497, 1460,

1432, 1382, 1352, 1309, 1296, 1275, 1239, 1215, 1189, 1178, 1083, 1011, 885, 850 and 833;  $\delta_{\text{H}}$  (300 MHz;  $\text{CDCl}_3$ ) 1.13 (18H, d,  $J = 7.2$ ,  $(\text{CH}(\text{CH}_3)_2)_3$ ), 1.33 (3H, m,  $(\text{CH}(\text{CH}_3)_2)_3$ ), 3.95 (3H, s,  $\text{OCH}_3$ ), 4.03 (3H, s,  $\text{OCH}_3$ ), 7.27 (1H, d,  $J = 2.3$ , H3), 7.50 (1H, s, H6) and 8.91 (1H, br s, NH);  $\delta_{\text{C}}$  (50 MHz;  $\text{CDCl}_3$ ) 12.81 (CH), 17.98 ( $\text{CH}_3$ ), 52.20 ( $\text{CH}_3$ ), 53.25 ( $\text{CH}_3$ ), 107.98 (CH), 114.12 (C), 126.46 (C), 126.81 (CH), 135.60 (C), 135.88 (C), 153.70 (C) and 161.80 (C);  $m/z$  ( $\text{ESI}^+$ ) 380 (24%), 379 ( $\text{MH}^+$ , 100), 365 (13);  $m/z$  ( $\text{ESI}^-$ ) 378 (31%), 377 ( $\text{M-H}^-$ , 100); HRMS ( $\text{ESI}^+$ ) found ( $\text{MH}^+$ ) 379.2052,  $\text{C}_{19}\text{H}_{31}\text{N}_2\text{O}_4\text{Si}$  requires 379.2053.

### Fluoride promoted deprotection of the TIPS-protected 5-azaindole 14: preparation of 7-hydroxy-4-methoxy 5-azaindole 3a.

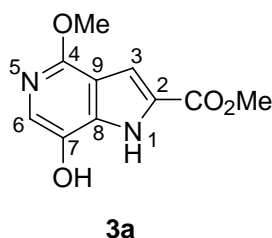

A tetra *n*-butyl-ammonium fluoride 1M solution in THF (1.15 mL, 1.15 mmol) was added to a stirred solution of 5-azaindole **7** (290 mg, 0.76 mmol) in anhydrous THF (1.2 mL) at 0°C under argon. The temperature was allowed to raise to room temperature and the resulting mixture for stirred for 35 minutes. After addition of water (1.5 mL) and EtOAc (10mL), the aqueous phase was extracted with EtOAc (2×10 mL). The organic phases was washed with water (2×10 mL) and dried over  $\text{Na}_2\text{SO}_4$ . After filtration and removal of the solvents under reduced pressure, the residue was purified by flash chromatography (PE/EtOAc 40:60) to afford **3a** as an orange solid (157 mg, 92%).

Spectral data of the product were similar to those of compound **3a** which was obtained after  $\text{BBr}_3$ -mediated demethylation of 4,7-dimethoxy 5-azaindole **2a**.

### 2-Azido-3-(2-methoxy-5-methoxymethoxy-pyridin-4-yl)-acrylic acid methyl ester 15a

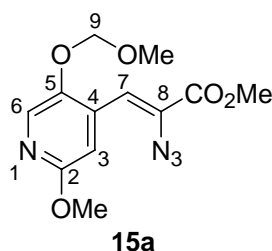

Sodium metal (95 mg, 4.1 mmol) was dissolved in anhydrous methanol (3 mL) at 0°C under argon. To this preformed sodium methoxide solution at 0°C was quickly added a solution of aldehyde **6b** (199 mg, 1.0 mmol) and methyl azidoacetate (440 mg, 3.8 mmol) in methanol (3 mL). The mixture was stirred at 30°C for one hour, then poured onto crushed ice (20 g) and held for one hour at 4°C. The product **15a** was recovered by filtration on a sintered glass funnel as a pale yellow solid (60.6 mg, 21%).

Mp 78-79°C (decomposed);  $\nu_{\text{max}}$  (KBr)/ $\text{cm}^{-1}$  3418, 3105, 2956, 2856, 2129, 1716, 1618, 1606, 1546, 1482, 1434, 1381, 1319, 1275, 1260, 1219, 1202, 1155, 1084, 1039, 989 and 962;  $\delta_{\text{H}}$  (300 MHz;  $\text{CDCl}_3$ ) 3.51 (3H, s,  $\text{OCH}_3$ ), 3.91 (3H, s,  $\text{OCH}_3$ ), 3.93 (3H, s,  $\text{OCH}_3$ ), 5.15 (2H, s,  $\text{CH}_2\text{OCH}_3$ ), 7.15 (1H, s, CH), 7.55 (1H, s, ArH), 8.04 (1H, s, ArH);  $\delta_{\text{C}}$  (50 MHz;  $\text{CDCl}_3$ ) 53.4 ( $\text{CH}_3$ ), 53.67 ( $\text{CH}_3$ ), 56.38 ( $\text{CH}_3$ ), 96.42 ( $\text{CH}_2$ ), 110.61 (CH), 116.04 (CH), 129.49 (C), 133.76 (CH), 134.05 (C), 146.50 (C), 159.50 (C) and 163.46 (C);  $m/z$  ( $\text{ESI}$ ) 295 ( $\text{MH}^+$ , 7%), 267 ( $\text{MH}^+ - \text{N}_2$ , 69), 223 (41), 191 (100), 177 (36).

### 7-Methoxy-4-methoxymethoxy-1*H*-pyrrolo[2,3-*c*]pyridine-2-carboxylic acid methyl ester **16a**

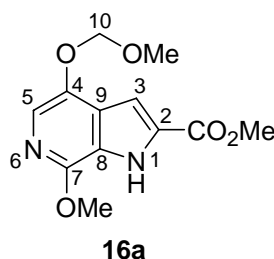

Compound **16a** was prepared according to the same procedure as for compound **2a**, scale: azidoacrylate **15a** (36.6 mg, 0.12 mmol), xylene (11 mL). The crude product was purified by flash chromatography (PE/EtOAc 70:30) to afford **16a** (yellow powder, 10.1 mg, 31%).

Mp 119-120°C;  $\nu_{\text{max}}$  (KBr)/cm<sup>-1</sup> 3322, 3299, 1716, 1706, 1510, 1443, 1333, 1314, 1299, 1274, 1227, 1206, 1163, 1149, 1092, 1055, 979, 917, 779 and 750;  $\delta_{\text{H}}$  (300 MHz; CDCl<sub>3</sub>) 3.55 (3H, s, OCH<sub>3</sub>), 3.96 (3H, s, OCH<sub>3</sub>), 4.07 (3H, s, OCH<sub>3</sub>), 5.26 (2H, s, CH<sub>2</sub>OCH<sub>3</sub>), 7.25 (1H, d,  $J$  = 2.3, H3), 7.54 (1H, s, H5) and 9.21 (1H, br s, NH);  $\delta_{\text{C}}$  (50 MHz; CDCl<sub>3</sub>) 52.32 (CH<sub>3</sub>), 53.32 (CH<sub>3</sub>), 56.27 (CH<sub>3</sub>), 96.06 (CH<sub>2</sub>), 105.83 (CH), 120.93 (CH), 123.06 (C), 126.54 (C), 128.46 (C), 143.72 (C), 147.40 (C) and 161.69 (C);  $m/z$  (ESI<sup>+</sup>) 268 (13%), 267 (MH<sup>+</sup>, 100), 223 (15); HRMS (CI) found (MH<sup>+</sup>) 267.0987, C<sub>12</sub>H<sub>15</sub>N<sub>2</sub>O<sub>5</sub> requires 267.0981.

### Acidic deprotection of the MOM-protected 6-azaindole **16a**: preparation of 4-hydroxy-7-methoxy 6-azaindole **3c**

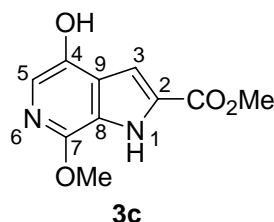

To a solution of 6-azaindole **16a** (80 mg, 0.30 mmol) in THF (1 mL) was added 3N aqueous HCl (1.1 mL) and the resulting mixture was stirred at 50°C for 3 hours. After this time, the mixture was cooled to room temperature and water (10 mL) was added followed by neutralisation (pH=7-8) with solid K<sub>2</sub>CO<sub>3</sub>. The aqueous phase was then extracted with EtOAc (3×10 mL). After drying of the organic phase over Na<sub>2</sub>SO<sub>4</sub>, filtration and removal of the solvents under reduced pressure, the residue was purified by flash chromatography (PE/EtOAc 40:60) to afford **3c** (52 mg, 77%) as an orange solid.

Spectral data of the product were similar to those of compound **3c** which was obtained after BBr<sub>3</sub>-mediated demethylation of 4,7-dimethoxy 5-azaindole **2c**.

## 2-Azido-3-(2-methoxy-5-methoxymethoxy-pyridin-4-yl)-acrylic acid *tert*-butyl ester **15b**

### Formation of the azidoalcohol **11b**:

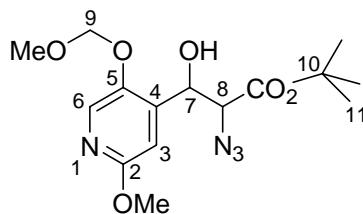

**11b**

Sodium hydride (60% dispersion in oil, 60 mg, 1.52 mmol) was added portionwise to cold (-30°C) isopropanol (4.5 mL). To the resulting sodium isopropoxide solution was then added solid aldehyde **6b** (150 mg, 0.76 mmol) until completely dissolved. A solution of *tert*-butyl azidoacetate (477 mg, 3.04 mmol) in isopropanol (0.8 mL) was then added dropwise to the reaction mixture. After stirring for four hours at -30°C, water (15 mL) was added. The mixture was allowed to warm to room temperature, then the aqueous phase was extracted with EtOAc (3×15 mL) and the combined organic phases dried over Na<sub>2</sub>SO<sub>4</sub>. After filtration and removal of the solvent under reduced pressure, the residue was purified by flash chromatography (PE/EtOAc 70:30) to afford azidoalcohol **11b** (170 mg, 63%) as a yellow oil.

This compound **11b** was obtained as a 1:1 mixture of two diastereomers: dia1 and dia2.

$\delta_{\text{H}}$  (300 MHz; DMSO-*d*<sub>6</sub>) 1.20 (9H, s, *t*-Bu dia1), 1.48 (9H, s, *t*-Bu dia2), 3.39 (3H, s, OCH<sub>3</sub> dia 1), 3.42 (3H, s, OCH<sub>3</sub> dia 2), 3.80 (3H, s, OCH<sub>3</sub> dia 1), 3.81 (3H, s, OCH<sub>3</sub> dia 2), 3.93-3.97 (2H, m, CHN<sub>3</sub> for both dia), 5.14-5.24 (5H, m, CH<sub>2</sub>OCH<sub>3</sub> for both dia + CHOH for dia1), 5.39 (dd, *J* = 5.3-2.6, 1H, CHOH for dia2), 6.24 (1H, d, *J* = 5.3, disappears after D<sub>2</sub>O addition, OH for dia1), 6.37 (1H, d, *J* = 5.3, disappears after D<sub>2</sub>O addition, OH for dia2), 6.83 (1H, s, ArH for dia1), 6.90 (1H, s, ArH for dia2), 7.88 (1H, s, ArH for dia1) and 7.90 (1H, s, ArH for dia2);  $\delta_{\text{C}}$  (75 MHz; DMSO-*d*<sub>6</sub>) 27.32 (CH<sub>3</sub>), 27.69 (CH<sub>3</sub>), 53.16 (CH<sub>3</sub>), 53.19 (CH<sub>3</sub>), 55.88 (CH<sub>3</sub>), 56.04 (CH<sub>3</sub>), 63.26 (CH), 64.13 (CH), 68.85 (CH), 69.40 (CH), 82.03 (C), 82.37 (C), 95.08 (CH<sub>2</sub>), 95.58 (CH<sub>2</sub>), 108.40 (CH), 108.50 (CH), 131.79 (CH), 132.41 (CH), 143.25 (C), 143.92 (C), 144.83 (C), 145.26 (C), 158.71 (C), 158.77 (C), 166.62 (C) and 167.37 (C). (It was impossible to assign with certitude signals for both diastereomers); *m/z* (ESI<sup>+</sup>) 731 (2M+Na<sup>+</sup>, 14%), 377 (M+Na<sup>+</sup>, 54), 355 (MH<sup>+</sup>, 100), 299 (MH<sup>+</sup>-isobutene (CH<sub>3</sub>)<sub>2</sub>C=CH<sub>2</sub>, 36).

### Formation and *in situ* elimination of the mesylate of compound **11b**: formation of azidoacrylate **15b**:

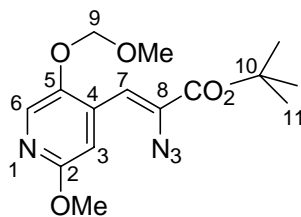

**15b**

To a solution of **11b** (649 mg, 1.83 mmol) in dichloromethane (50 mL) at 45°C was added quickly methanesulfonyl chloride (710  $\mu$ l, 9.19 mmol) and then triethylamine (2.6 ml, 18.30 mmol). The reaction mixture was stirred at 45°C for one hour then cooled to room temperature. After addition of a saturated aqueous solution of NaHCO<sub>3</sub> (50 mL) and decantation, the aqueous phase was extracted with CH<sub>2</sub>Cl<sub>2</sub> (3×100 mL). The organic phases were washed with brine (2×100 mL) and dried over Na<sub>2</sub>SO<sub>4</sub>. After filtration and removal of the solvent under reduced pressure, the residue was purified by flash chromatography (PE/EtOAc 80:20) to afford azidoacrylate **15b** (527 mg, 85%) as a yellow solid.

Mp 63-64°C;  $\nu_{\text{max}}$  (KBr)/cm<sup>-1</sup> 3435, 2924, 2116, 1712, 1605, 1484, 1384, 1277, 1217, 1200, 1153, 1078, 1037, 995 and 886;  $\delta_{\text{H}}$  (300 MHz; DMSO-*d*<sub>6</sub>) 1.54 (9H, s, *t*-Bu), 3.43 (3H, s, OCH<sub>3</sub>), 3.81 (3H, s, OCH<sub>3</sub>), 5.20 (2H, s, CH<sub>2</sub>OCH<sub>3</sub>), 6.99 (1H, s, CH), 7.44 (1H, s, ArH) and 8.02 (1H, s,



ArH);  $\delta_c$  (75 MHz; DMSO- $d_6$ ) 27.55 (CH<sub>3</sub>), 53.28 (CH<sub>3</sub>), 56.10 (CH<sub>3</sub>), 83.84 (C), 96.45 (CH<sub>2</sub>), 109.50 (CH), 114.10 (CH), 130.91 (C), 133.79 (C), 134.59 (CH), 145.85 (C), 158.70 (C) and 161.03 (C);  $m/z$  (ESI<sup>+</sup>): 359 (MNa<sup>+</sup>, 12%), 337 (MH<sup>+</sup>, 26), 309 (MH<sup>+</sup>-N<sub>2</sub>, 26), 253 (MH<sup>+</sup>-N<sub>2</sub>-isobutene (CH<sub>3</sub>)<sub>2</sub>C=CH<sub>2</sub>, 100), 177 (43).

#### 7-Methoxy-4-methoxymethoxy-1*H*-pyrrolo[2,3-*c*]pyridine-2-carboxylic acid tert-butyl ester **16b**

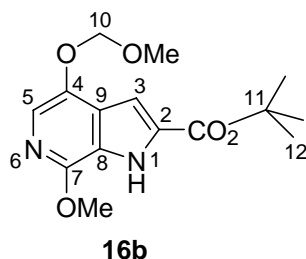

Compound **16b** was prepared according to the same procedure as for compound **2a**, scale: azidoacrylate **15b** (72 mg, 0.21 mmol), xylene (7.2 mL), reaction time 2 hours. The crude product was purified by flash chromatography (PE/EtOAc 70:30) to afford **16b** (47 mg, 72%) as a yellow powder.

Mp 93-94°C;  $\nu_{\max}$  (KBr)/cm<sup>-1</sup> 3307, 2979, 2936, 1713, 1620, 1587, 1506, 1445, 1408, 1370, 1336, 1300, 1278, 1227, 1208, 1154, 1093, 1059, 973 and 923;  $\delta_H$  (300 MHz; DMSO- $d_6$ ) 1.56 (9H, s, *t*-Bu), 3.43 (3H, s, OCH<sub>3</sub>), 3.97 (3H, s, OCH<sub>3</sub>), 5.24 (2H, s, CH<sub>2</sub>OCH<sub>3</sub>), 7.03 (s, 1H, ArH), 7.40 (1H, s, ArH) and 12.44 (1H, br s, NH);  $\delta_c$  (75 MHz; DMSO- $d_6$ ) 27.88 (CH<sub>3</sub>), 52.89 (CH<sub>3</sub>), 55.78 (CH<sub>3</sub>), 81.55 (C), 95.37 (CH<sub>2</sub>), 104.48 (CH), 119.66 (CH), 122.83 (C), 125.74 (C), 130.98 (C), 142.92 (C), 147.04 (C) and 159.84 (C);  $m/z$  (ESI<sup>+</sup>) 308 (MH<sup>+</sup>, 46%), 252 (100), 222 (48); HRMS (EI) found (M<sup>+</sup>) 308.1370, C<sub>15</sub>H<sub>20</sub>N<sub>2</sub>O<sub>5</sub> requires 308.1372.

#### Acidic deprotection and *in situ* transesterification of the MOM-protected 6-azaindole **16b**: preparation of 4-hydroxy-7-methoxy 6-azaindole **3c**.

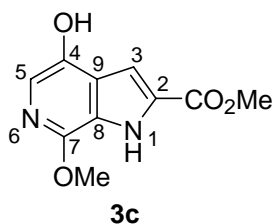

To a solution of 6-azaindole **16b** (48 mg, 0.16 mmol) in methanol (4 mL) was added 3N aqueous HCl (1 mL) and the resulting mixture stirred at 25°C for 4h30: after this time, TLC analysis showed the complete consumption of the starting material. The reaction was then heated to 50°C for 20 hours. A new product was formed whose R<sub>f</sub> matched that of compound **3c**. After this time, the mixture was evaporated to dryness. Water (4 mL) was then added to the residue and the pH of this solution was carefully adjusted to pH=7 (controlled with a calibrated pH meter) with 0.5M sodium hydroxide solution. The aqueous phase was then extracted with EtOAc (4×15 mL) and, after drying over Na<sub>2</sub>SO<sub>4</sub>, the solvent was removed under reduced pressure. The resulting crude product was purified by flash chromatography (cyclohexane/EtOAc 60:40) to afford compound **3c** (17 mg, 49%) as a light brown solid.

Spectral data of the product were similar to those of compound **3c** which was obtained after BBr<sub>3</sub>-mediated demethylation of 4,7-dimethoxy 5-azaindole **2c**.

**Typical experimental procedure for the oxidation of 7-hydroxy-4-methoxy 5-azaindole **3a**: Preparation of 7-Hydroxy-4,6-dimethoxy-1*H*-pyrrolo[3,2-*c*]pyridine-2-carboxylic acid methyl ester **17a****

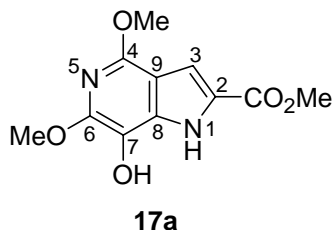

To a solution of **3a** (26 mg, 0.11 mmol) in a 1:1 acetonitrile/methanol mixture (18 mL) at room temperature was added in one portion [Bis(trifluoroacetoxy)iodo]benzene (PIFA) (50 mg, 0.11 mmol). After stirring at room temperature for four hours, the resulting mixture was filtered off on a sintered glass funnel filled with a one cm thick pad of silica gel, washing with EtOAc. After evaporation of the filtrate under reduced pressure, the residue was purified by flash chromatography (cyclohexane/EtOAc 70:30) to afford **17a** (25 mg, 85%) as a yellow powder.

Mp 199-200°C;  $\nu_{\max}$  (KBr)/cm<sup>-1</sup> 3501, 3373, 2951, 2853, 1702, 1675, 1653, 1612, 1537, 1497, 1470, 1446, 1416, 1377, 1329, 1310, 2289, 2211, 1228, 1042, 977 and 748;  $\delta_{\text{H}}$  (300 MHz; DMSO-d<sub>6</sub>) 3.83 (3H, s, OCH<sub>3</sub>), 3.90 (3H, s, OCH<sub>3</sub>), 3.93 (3H, s, OCH<sub>3</sub>), 7.02 (1H, d, *J* = 2.0, H3), 8.41 (1H, s, ArOH) and 11.63 (1H, s, NH);  $\delta_{\text{C}}$  (75 MHz; DMSO-d<sub>6</sub>) 51.80 (CH<sub>3</sub>), 52.83 (CH<sub>3</sub>), 53.63 (CH<sub>3</sub>), 106.42 (CH), 108.64 (C), 119.49 (C), 126.73 (C), 136.46 (C), 145.53 (C), 148.19 (C) and 161.07 (C); *m/z* (CI) 254 (13%), 253 (MH<sup>+</sup>, 100); HRMS (CI) found (MH<sup>+</sup>) 253.0820, C<sub>11</sub>H<sub>13</sub>N<sub>2</sub>O<sub>5</sub> requires 253.0824.

**Oxidation of 4-hydroxy-7-methoxy 6-azaindole **3c**: Preparation of 4-Hydroxy-5,7-dimethoxy-1*H*-pyrrolo[2,3-*c*]pyridine-2-carboxylic acid methyl ester **17c****

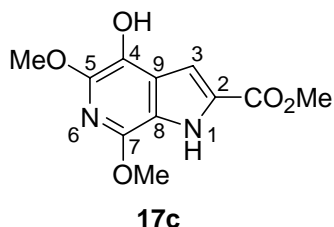

Compound **17c** was prepared according to the same procedure as for compound **17a**, scale: azaindole **3c** (50 mg, 0.22 mmol), PIFA (97 mg, 0.22 mmol), 1:1 acetonitrile/methanol mixture (18 mL). The crude product was purified by flash chromatography (cyclohexane/EtOAc 60:40) to afford **17c** (30 mg, 53%) as a yellow powder.

Mp 176-177°C;  $\nu_{\max}$  (KBr)/cm<sup>-1</sup> 3435, 3323, 2951, 1715, 1644, 1598, 1526, 1507, 1451, 1416, 1354, 1328, 1291, 1250, 1210, 1184, 1125, 1095, 1039, 1000, 977, 907 and 770;  $\delta_{\text{H}}$  (300 MHz; DMSO-d<sub>6</sub>) 3.85 (3H, s, OCH<sub>3</sub>), 3.86 (3H, s, OCH<sub>3</sub>), 3.96 (3H, s, OCH<sub>3</sub>), 7.08 (1H, d, *J* = 2.0, H3), 8.63 (1H, s, ArOH) and 12.10 (1H, s, NH); <sup>13</sup>C NMR (75 MHz, DMSO-d<sub>6</sub>): 51.98 (CH<sub>3</sub>), 52.86 (CH<sub>3</sub>), 53.96 (CH<sub>3</sub>), 104.72 (CH), 119.11 (C), 125.78 (C), 127.81 (C), 129.86 (C), 140.43 (C), 140.89 (C) and 161.19 (C); *m/z* (ESI<sup>+</sup>) 293 (21%), 253 (MH<sup>+</sup>, 100), 238 (27), 223 (28), 209 (25); HRMS (ESI<sup>+</sup>) found (MH<sup>+</sup>) 253.0822, C<sub>11</sub>H<sub>13</sub>N<sub>2</sub>O<sub>5</sub> requires 253.0824.

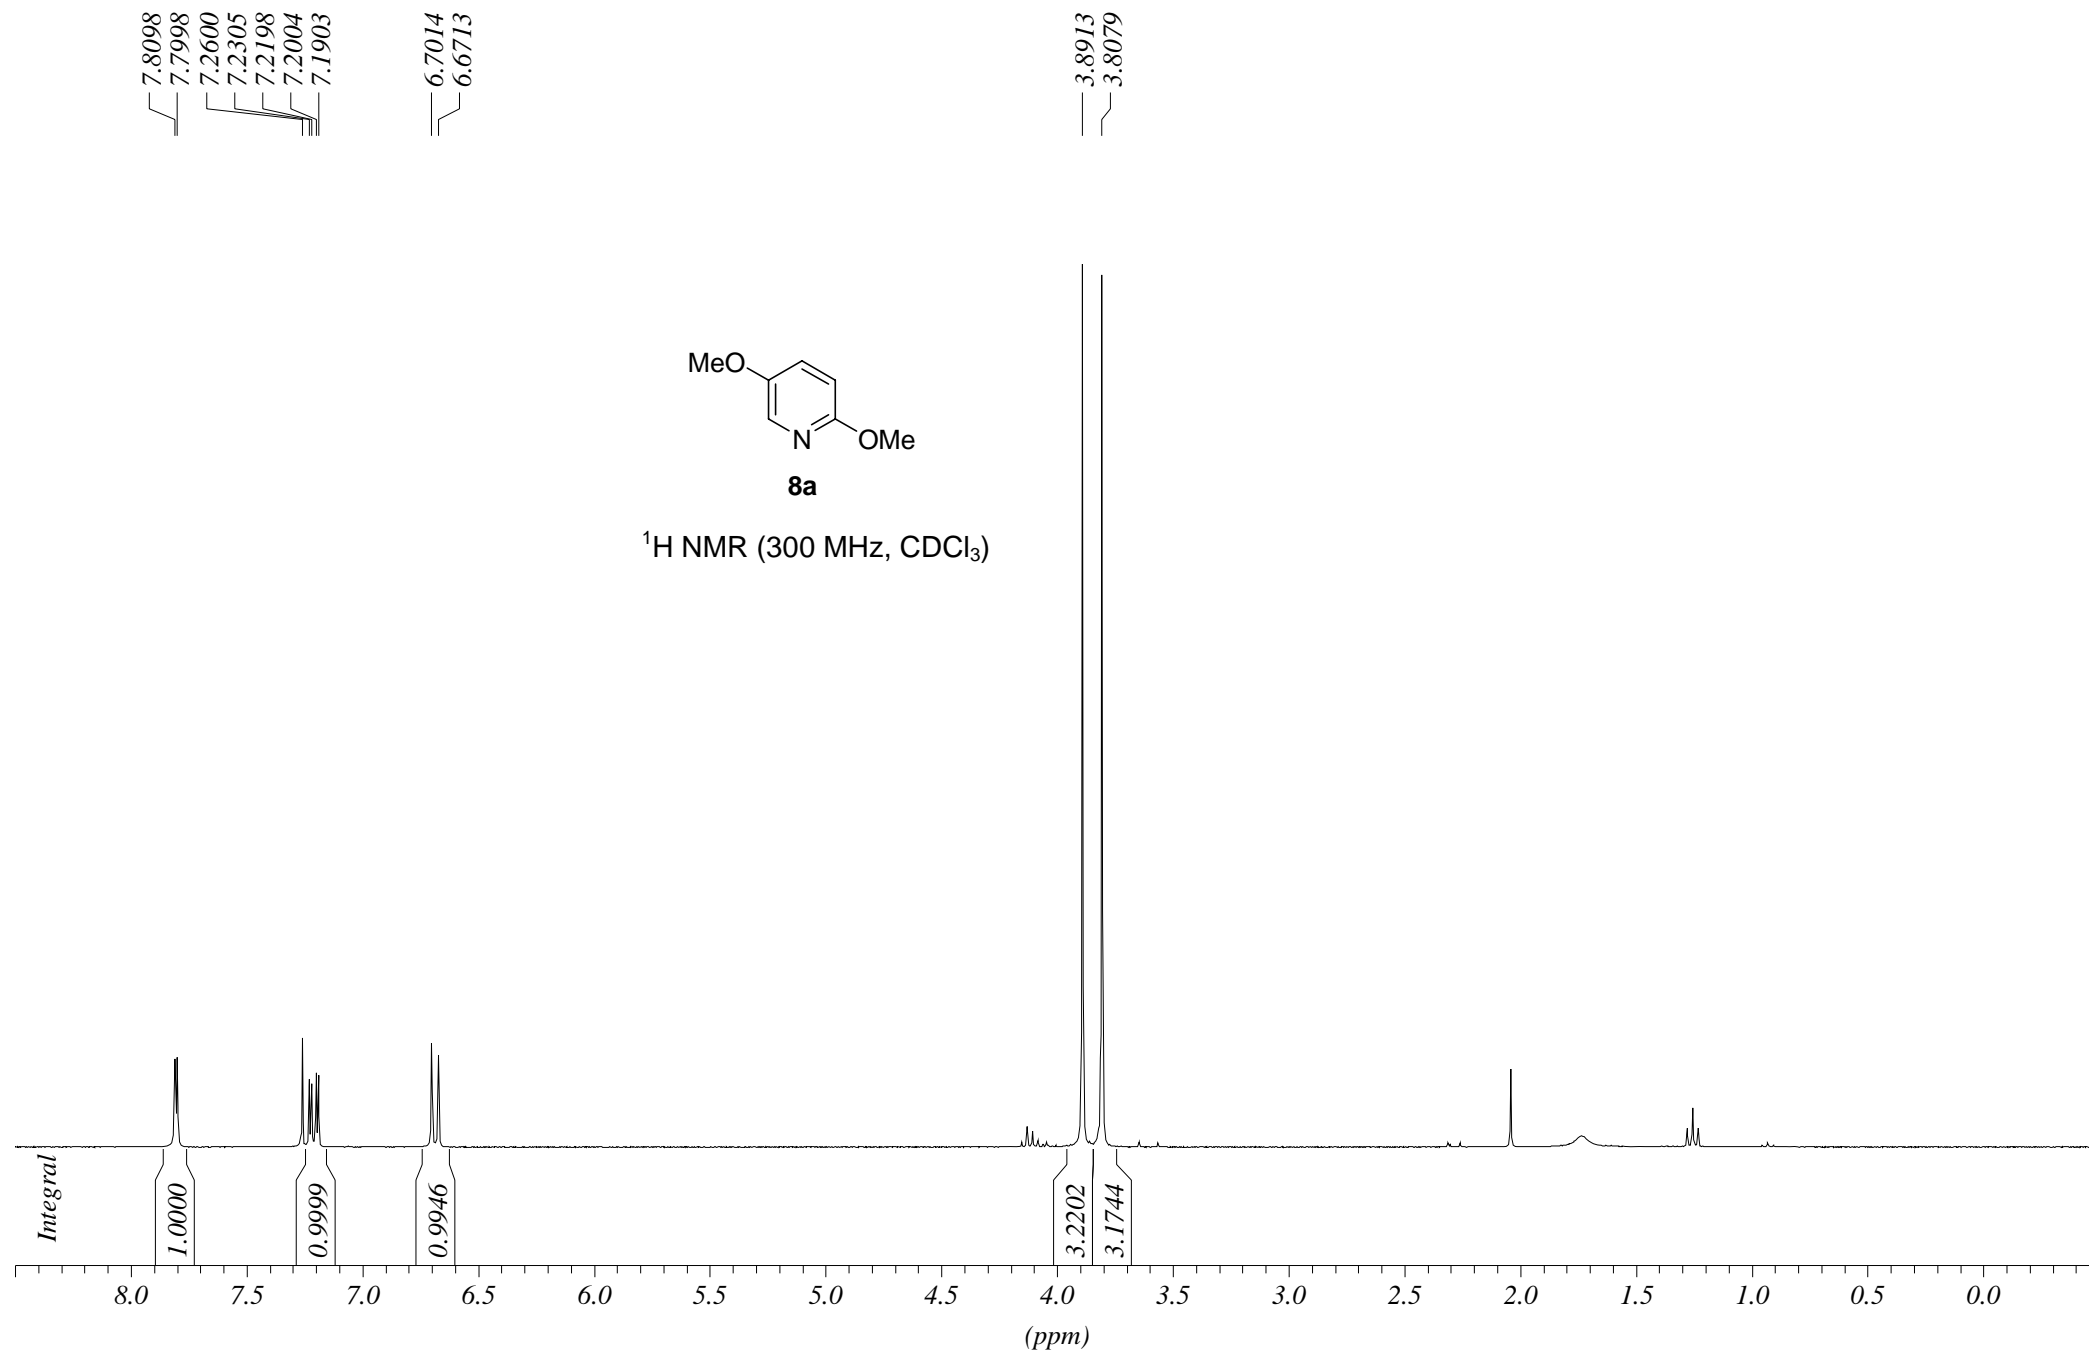

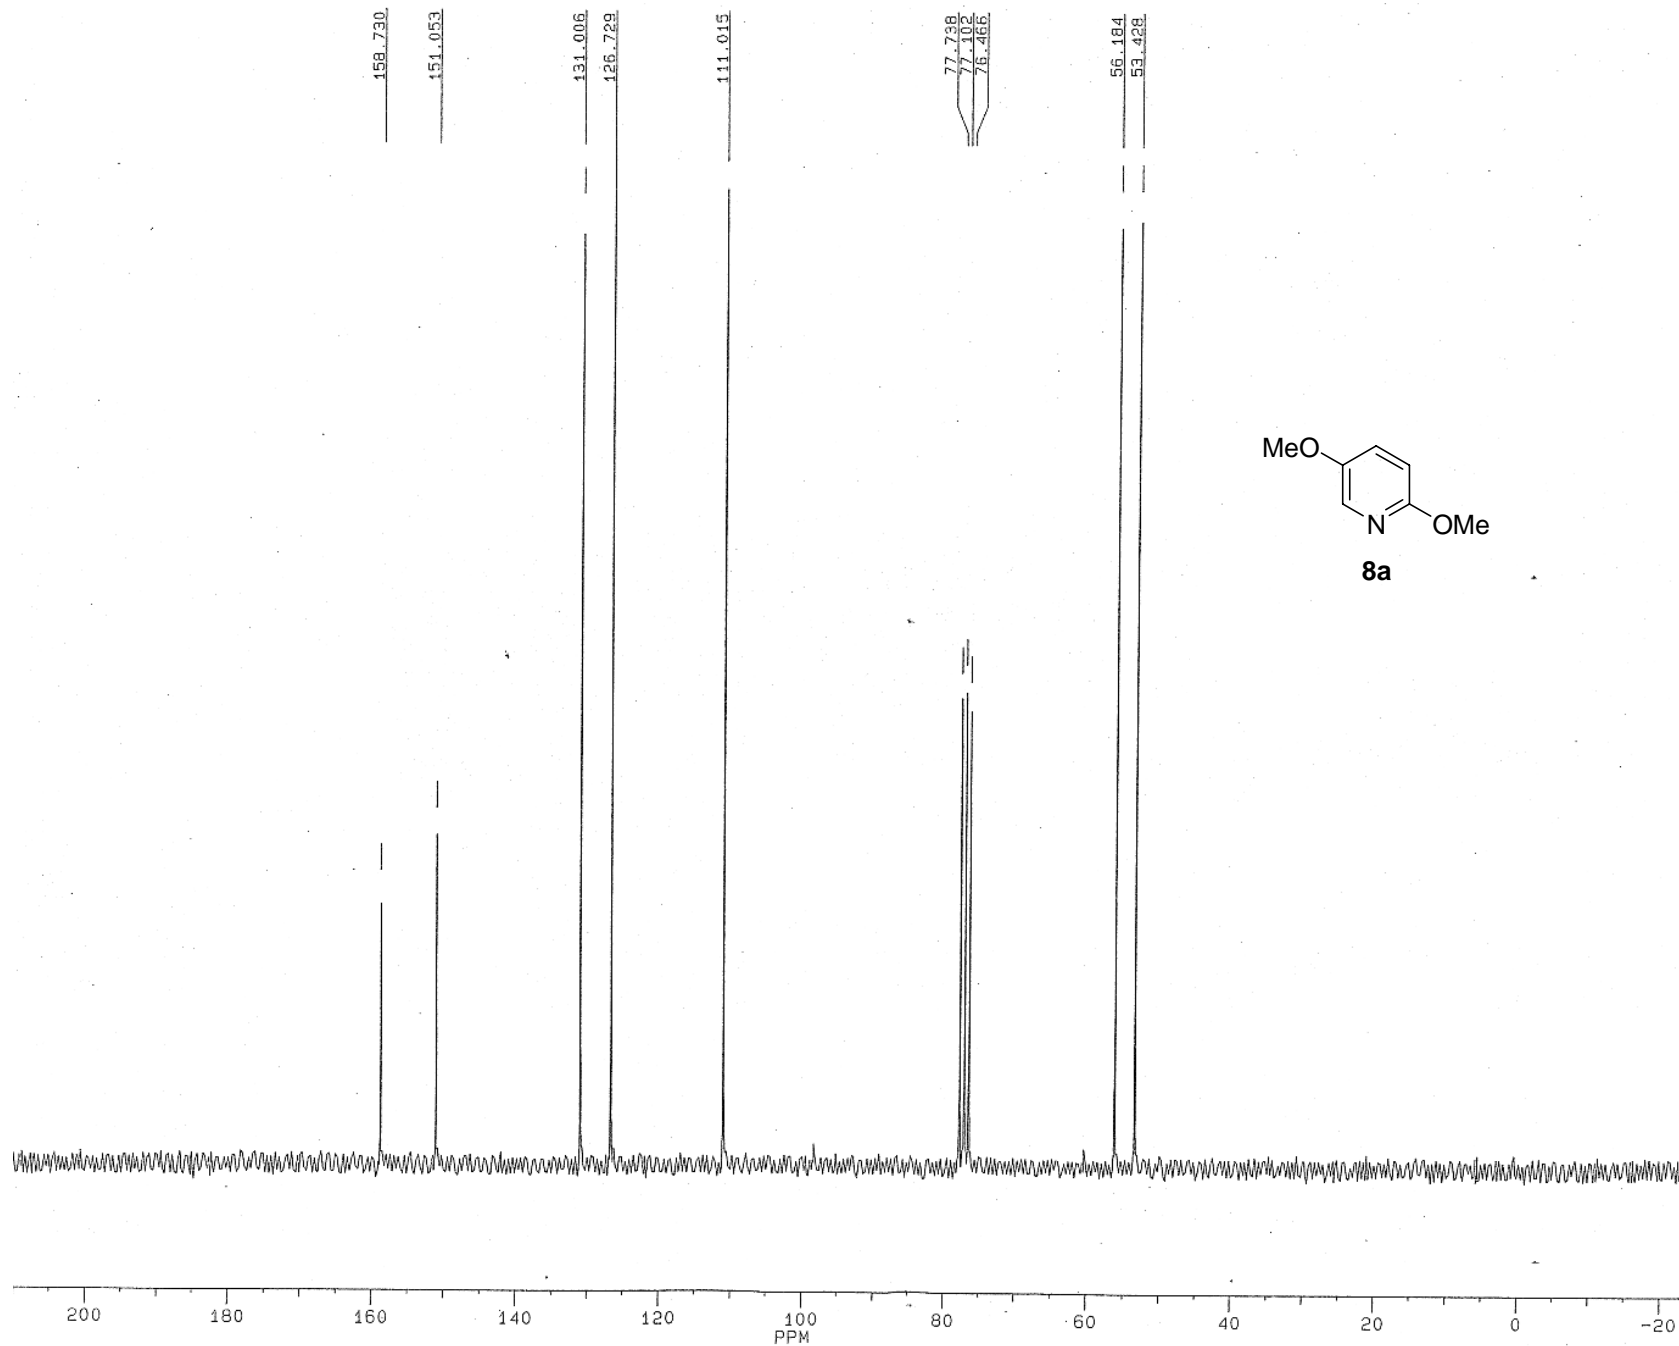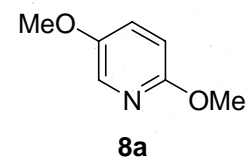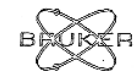

AV061F.113  
 AU PR06:  
 X02.AU  
 DATE 7-4-4  
 TIME 4:04

SF 50.323  
 SY 50.0  
 O1 8396.387  
 SI 65536  
 TD 65536  
 SW 12500.000  
 HZ/PT .381

PW 0.0  
 RD 0.0  
 AQ 2.621  
 RG 400  
 NS 800  
 TE 297

FW 15700  
 O2 3154.531  
 DP 15H D0

LB 1.000  
 GB 0.0  
 CX 35.00  
 CY 20.00  
 F1 225.342P  
 F2 -23.044P  
 HZ/CM 357.132  
 PPM/CM 7.097  
 SR 3314.07

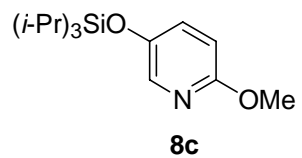

<sup>1</sup>H NMR (300 MHz, CDCl<sub>3</sub>)

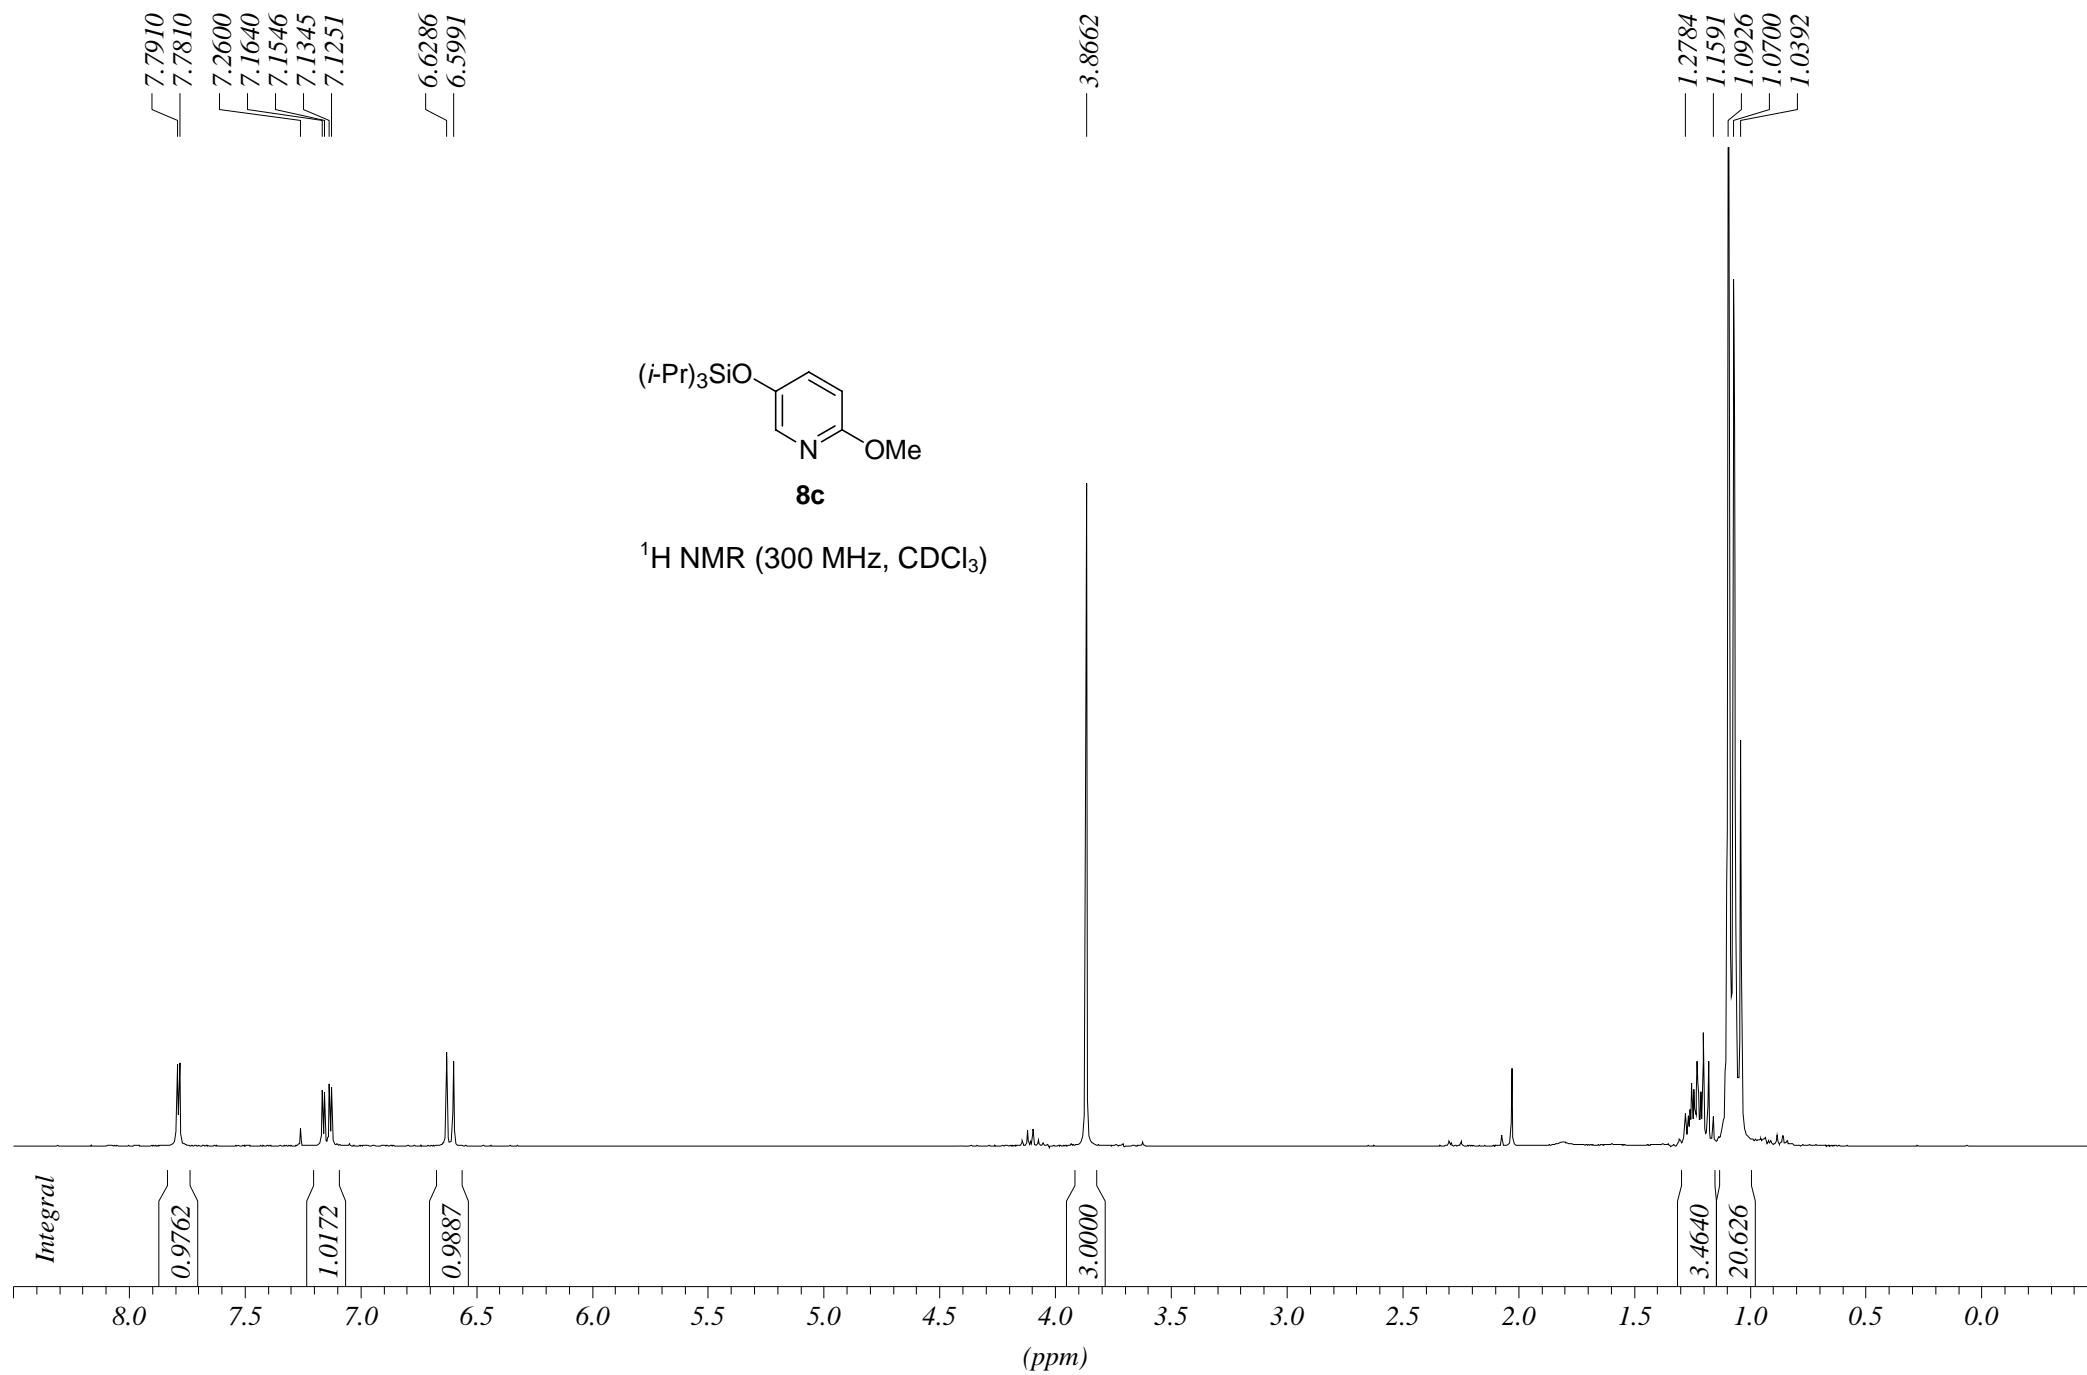

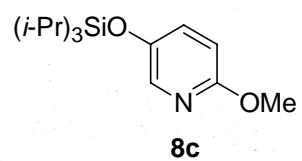

<sup>13</sup>C NMR (50 MHz, CDCl<sub>3</sub>)

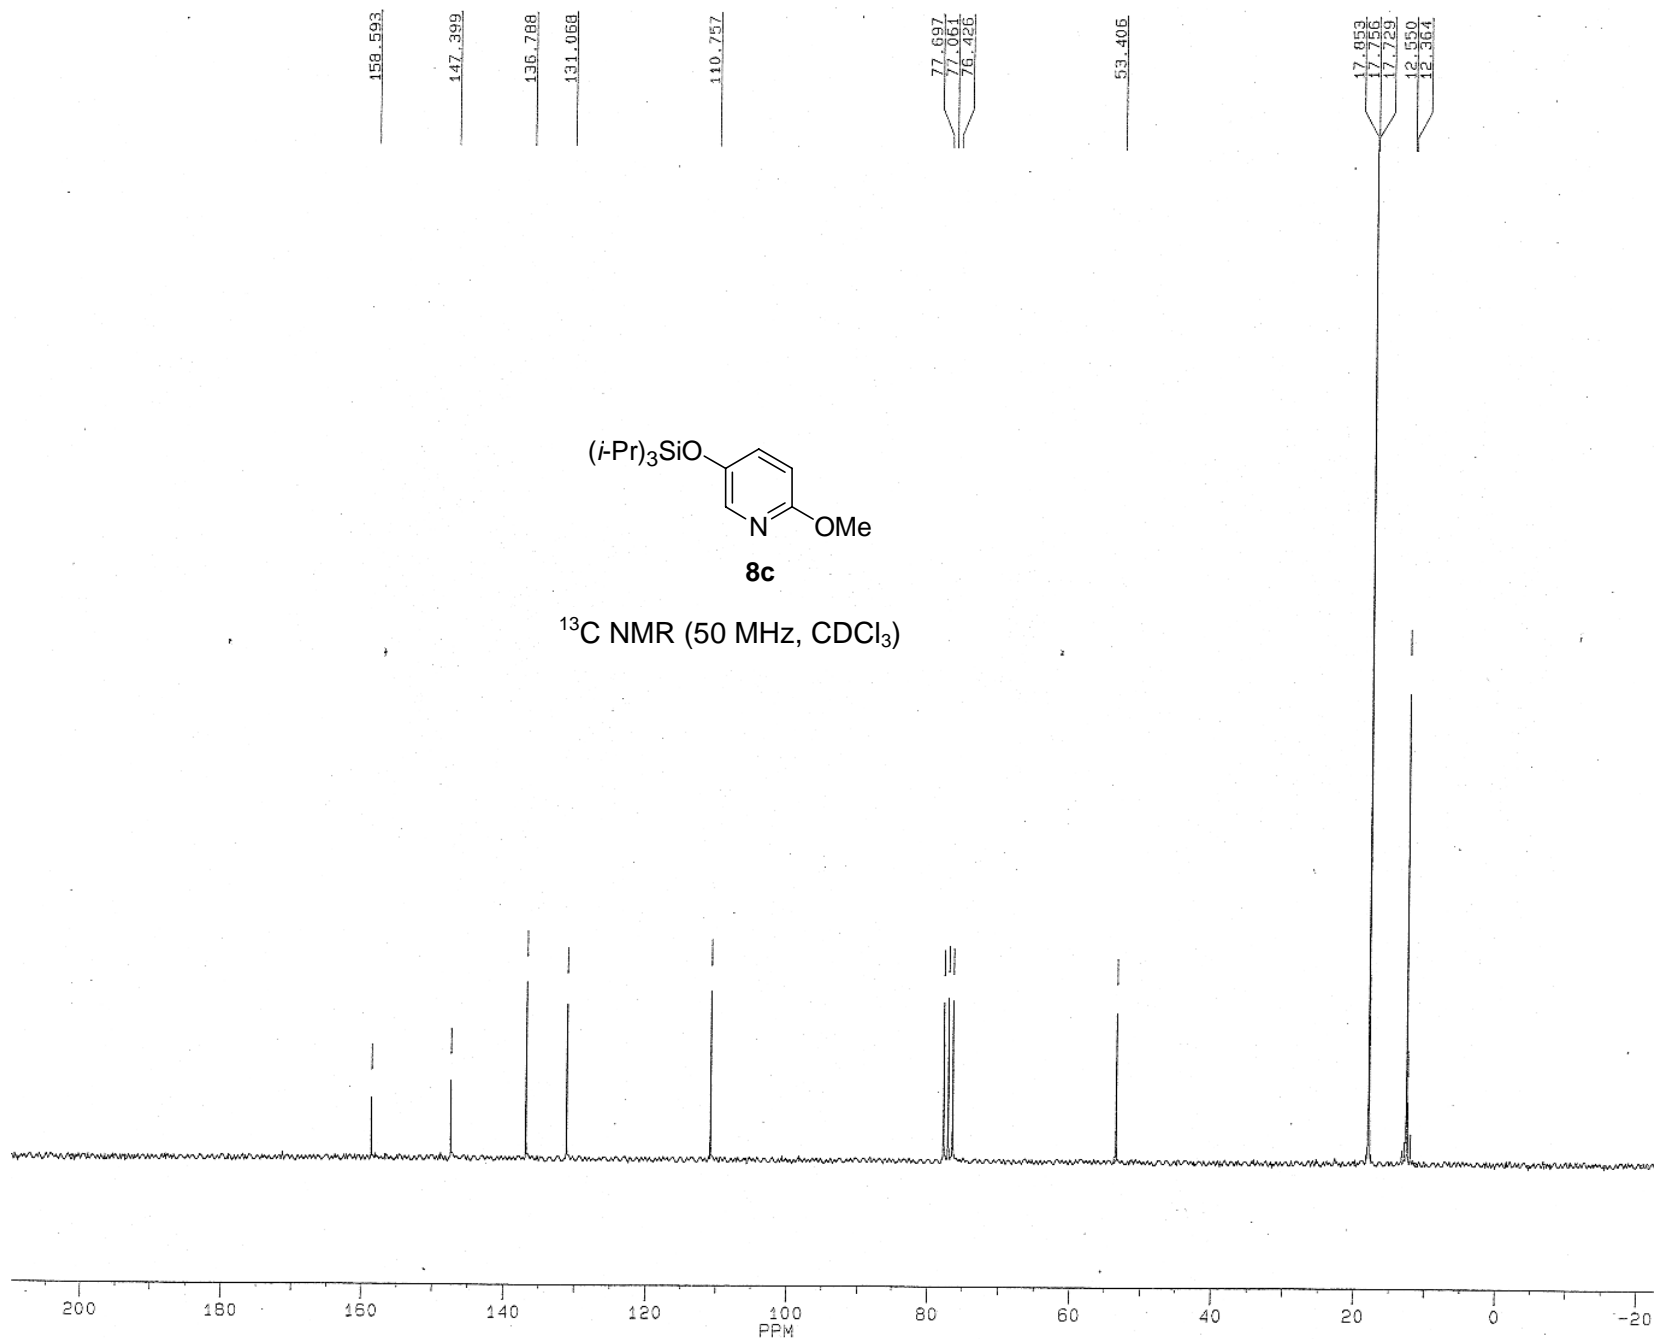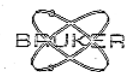

AV060F.114  
 AU PROG:  
 X02.AU  
 DATE 7-4-4  
 TIME 5:12

SF 50.323  
 SY 50.0  
 Q1 8396.387  
 SI 65536  
 TD 65536  
 SW 12500.000  
 HZ/PT .381

PW 0.0  
 RD 0.0  
 AQ 2.621  
 RG 400  
 NS 800  
 TE 297

FW 15700  
 Q2 3154.531  
 DP 15H D0

LB 1.000  
 GB 0.0  
 CX 35.00  
 CY 20.00  
 F1 225.221P  
 F2 -22.923P  
 HZ/CM 356.783  
 PPM/CM 7.090  
 SR 3314.07

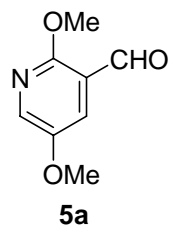

<sup>1</sup>H NMR (300 MHz, CDCl<sub>3</sub>)

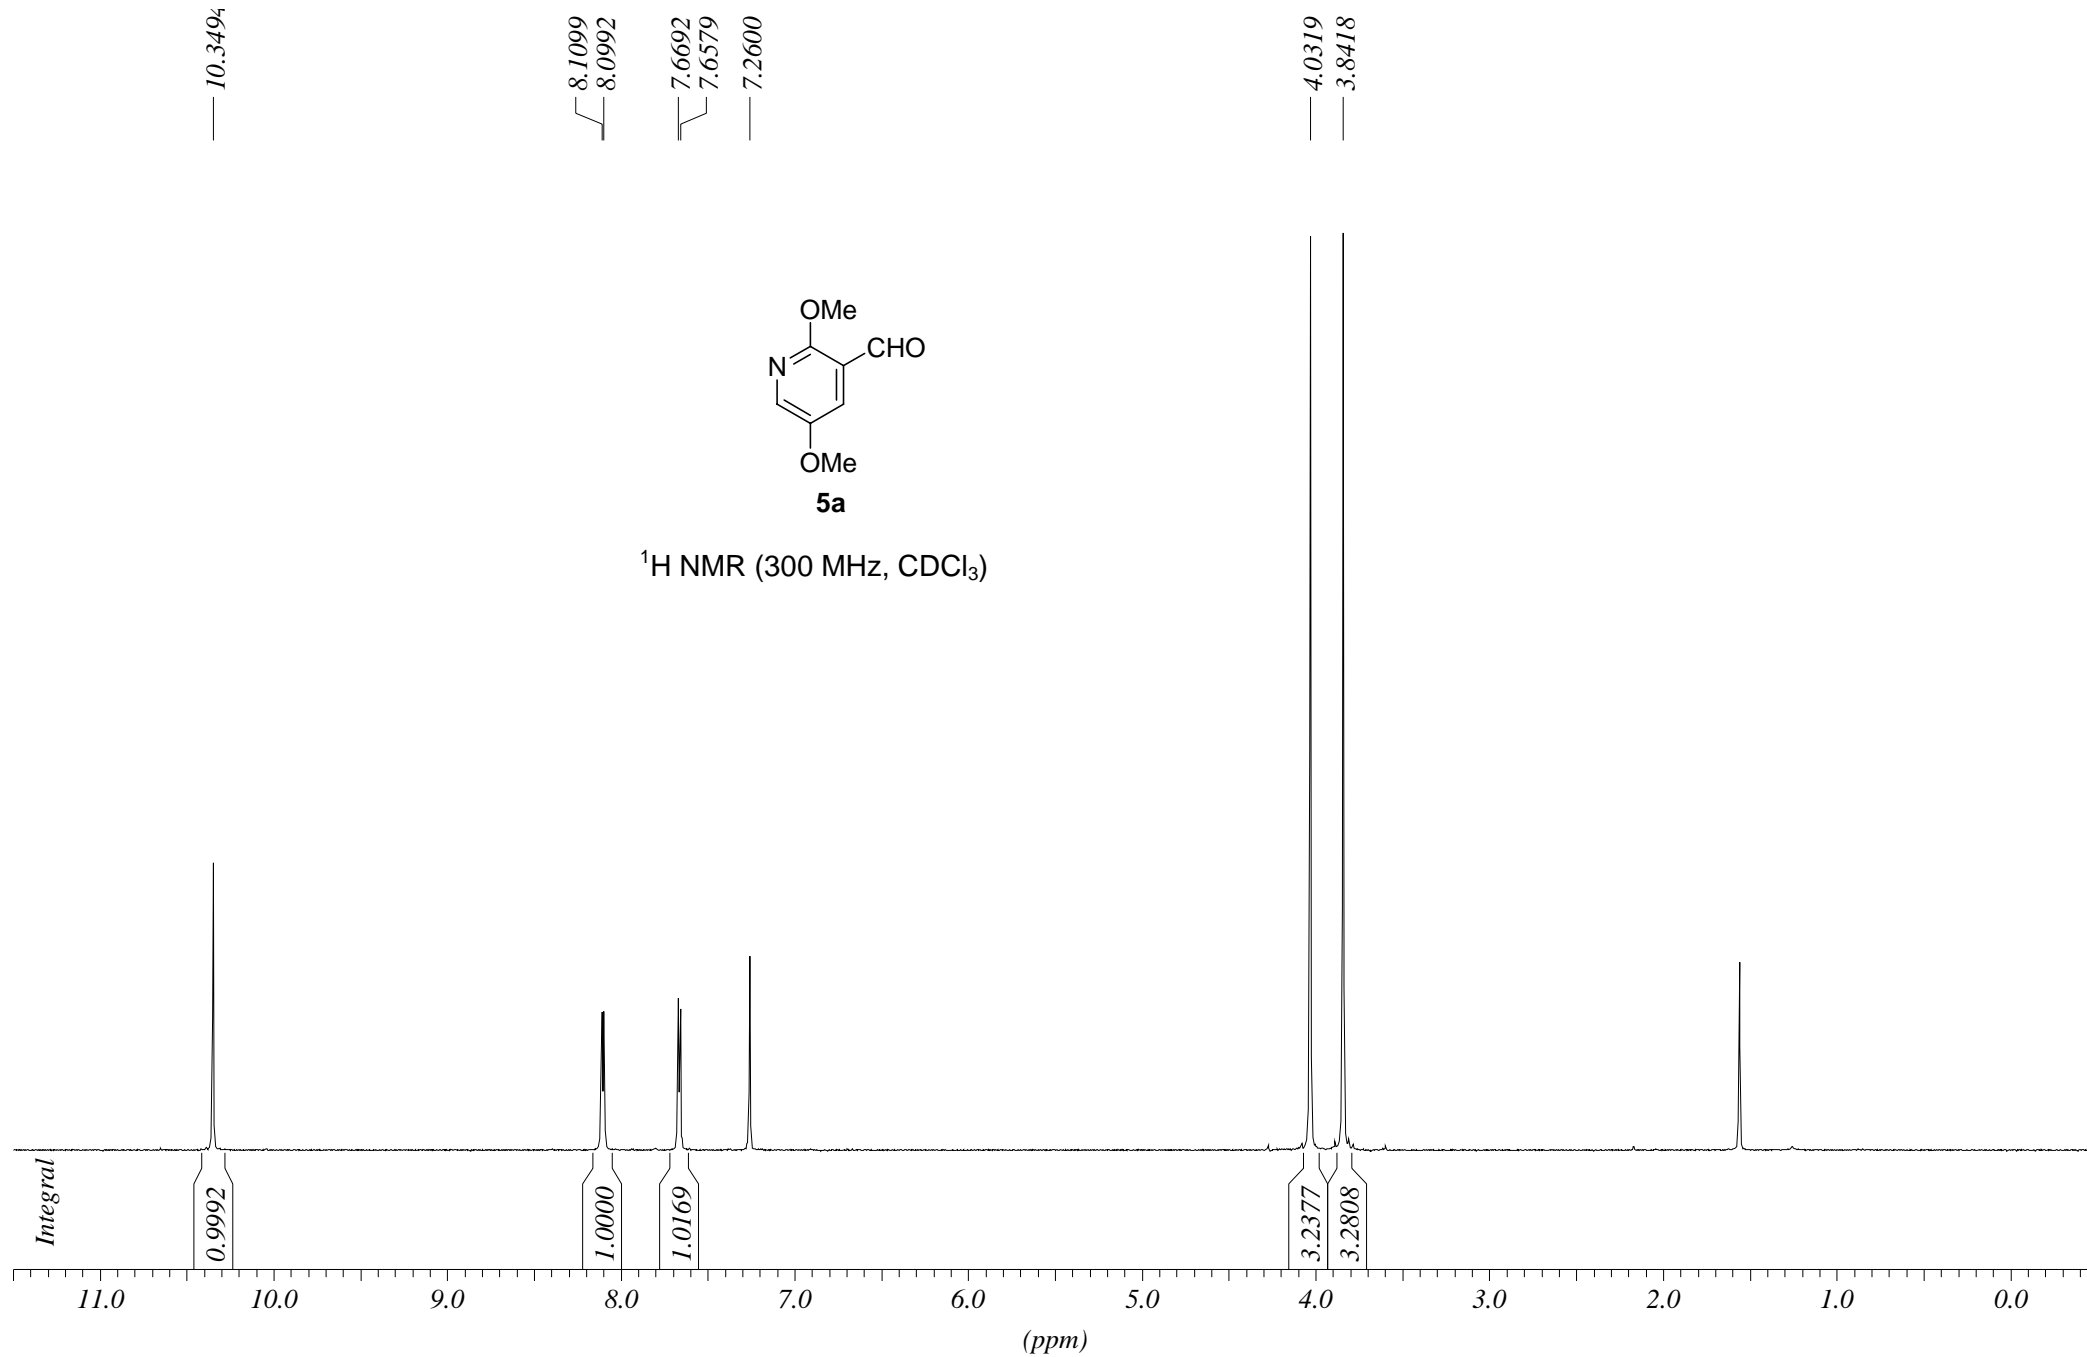

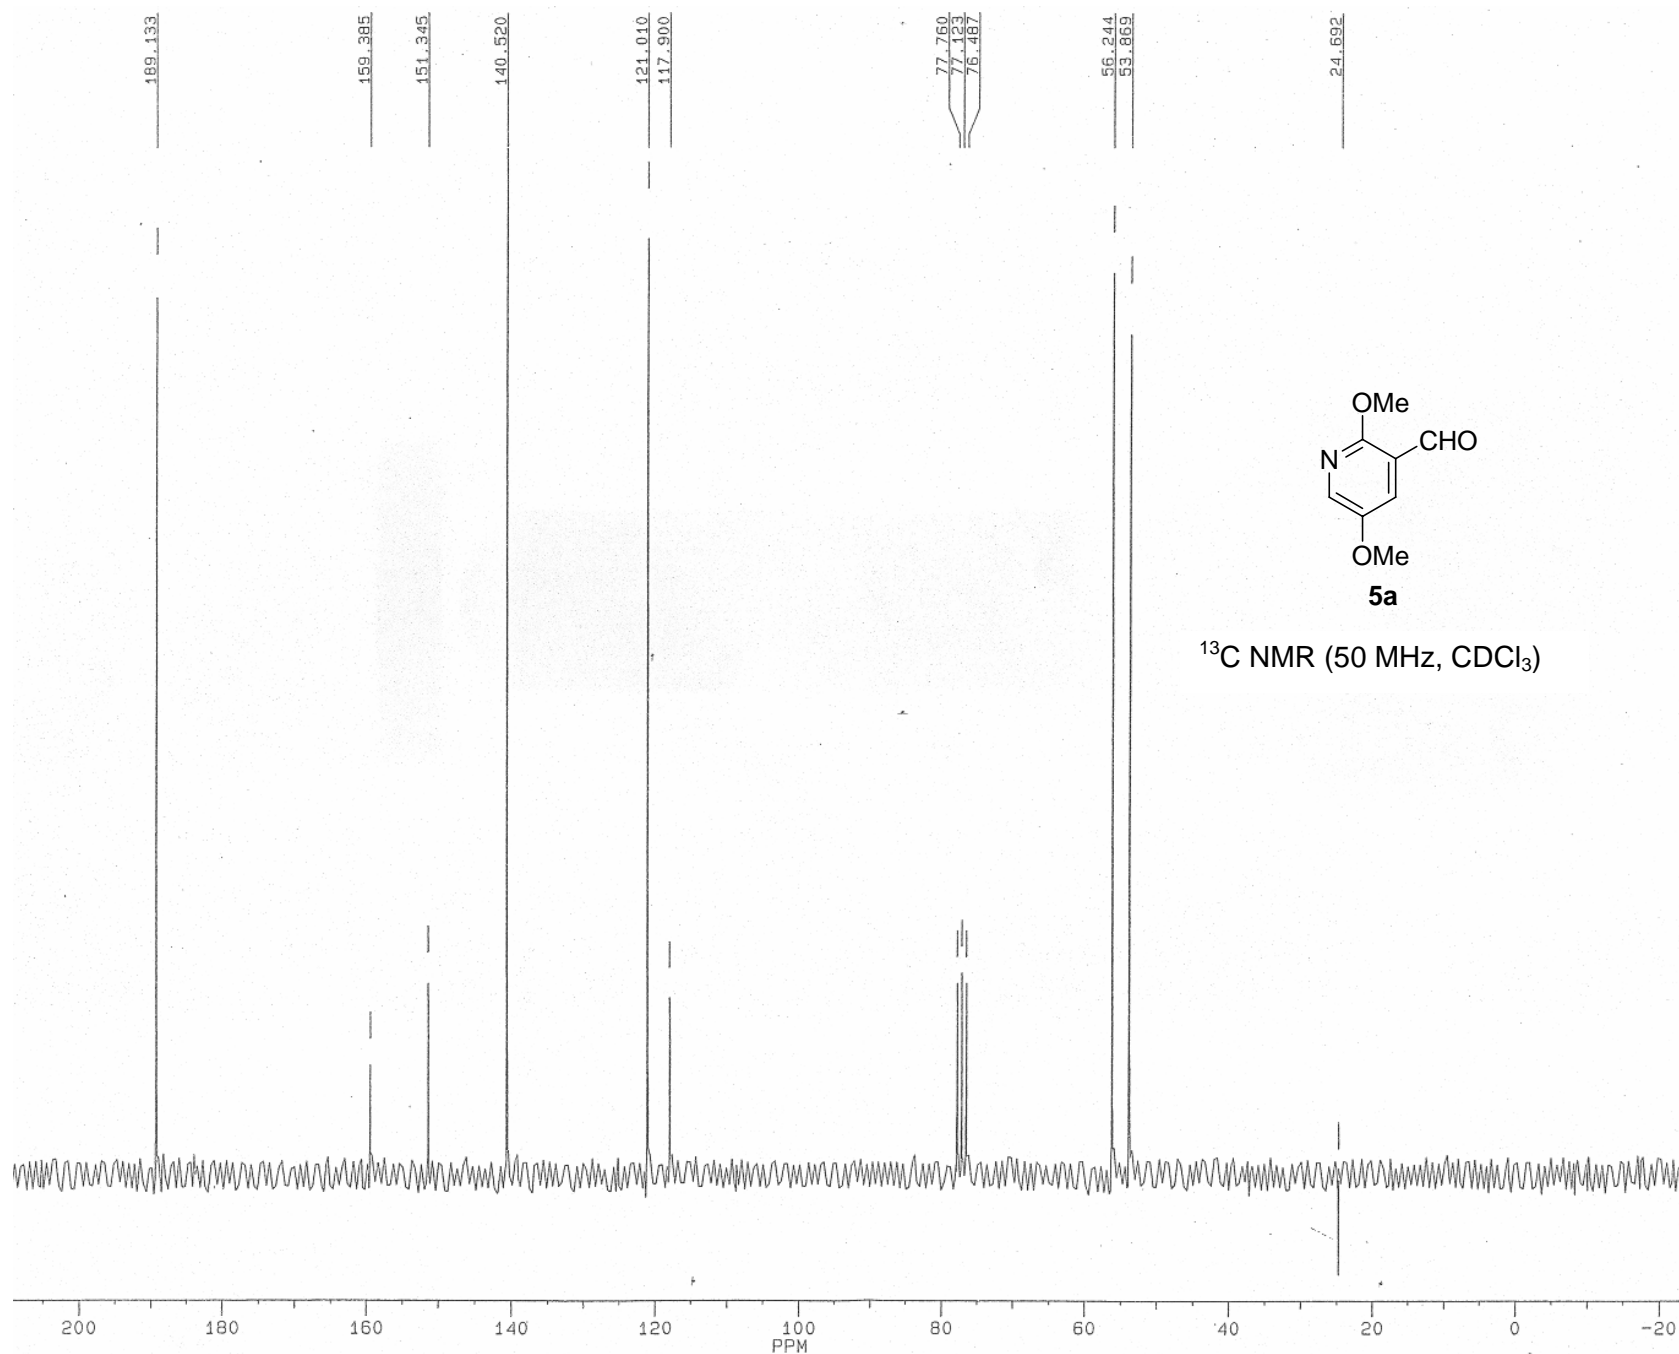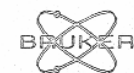

SR318C.ME06  
DATE 2-6-4  
TIME 13: 37

SF 50.323  
SY 50.0  
O1 8396.387  
SI 65536  
TD 65536  
SW 12500.000  
HZ/PT .381

PW 6.0  
RD 2.000  
AQ 2.621  
RG 400  
NS 128  
TE 297

FW 15700  
O2 3154.531  
DP 15H CPD

LB 1.000  
GB 0.0  
CX 35.00  
CY 20.00  
F1 225.342P  
F2 -23.044P  
HZ/CM 357.132  
PPM/CM 7.097  
SR 3314.07



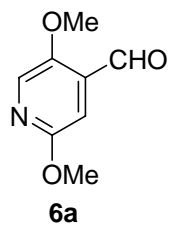

$^1\text{H}$  NMR (300 MHz,  $\text{CDCl}_3$ )

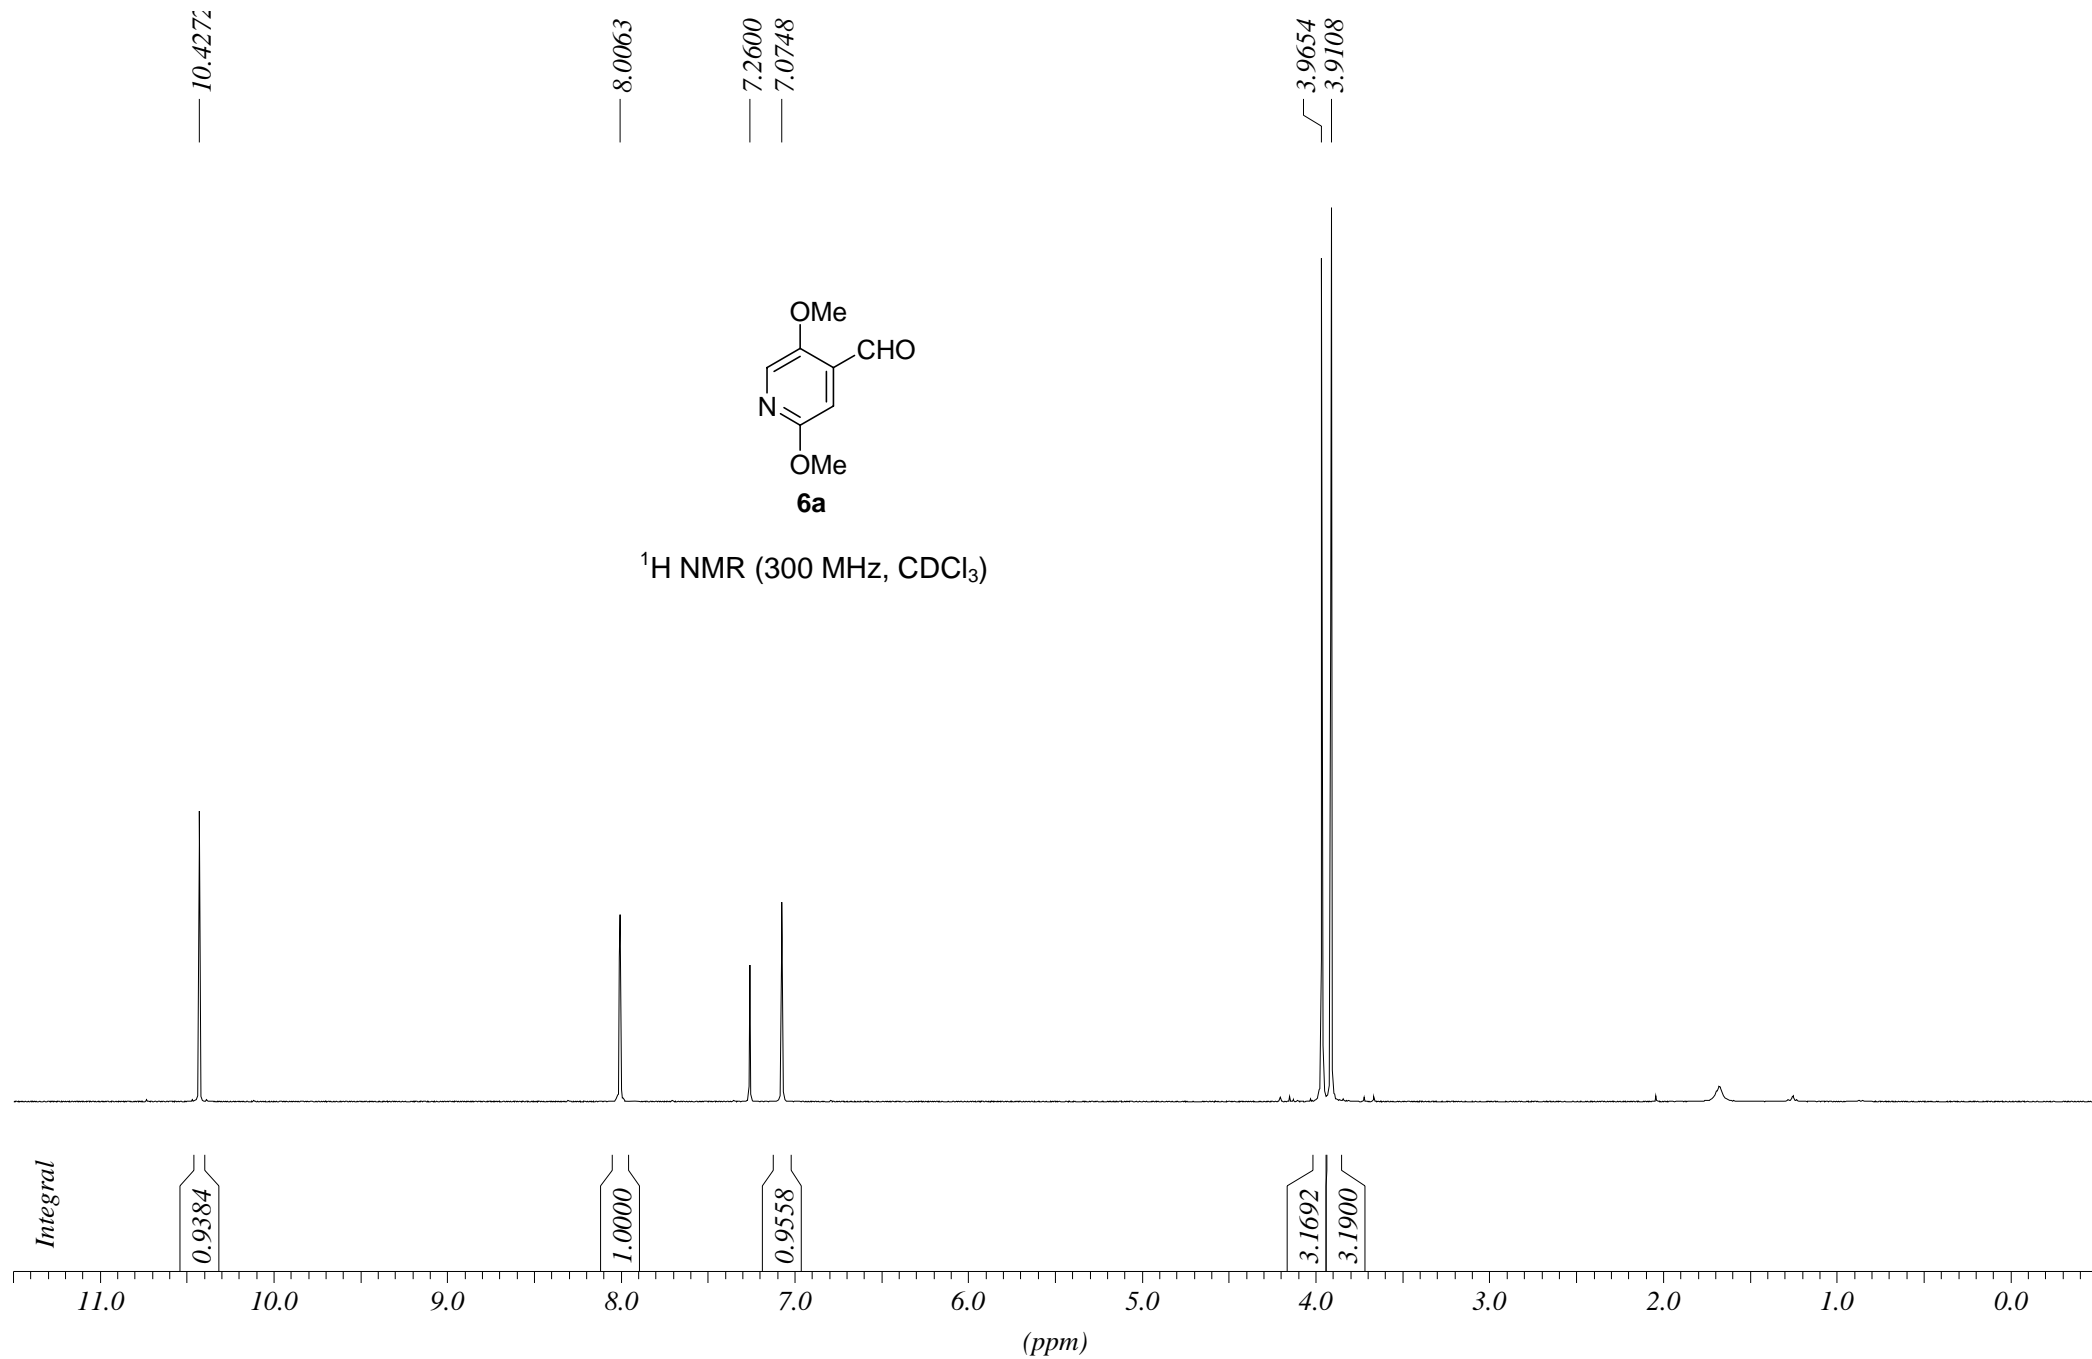

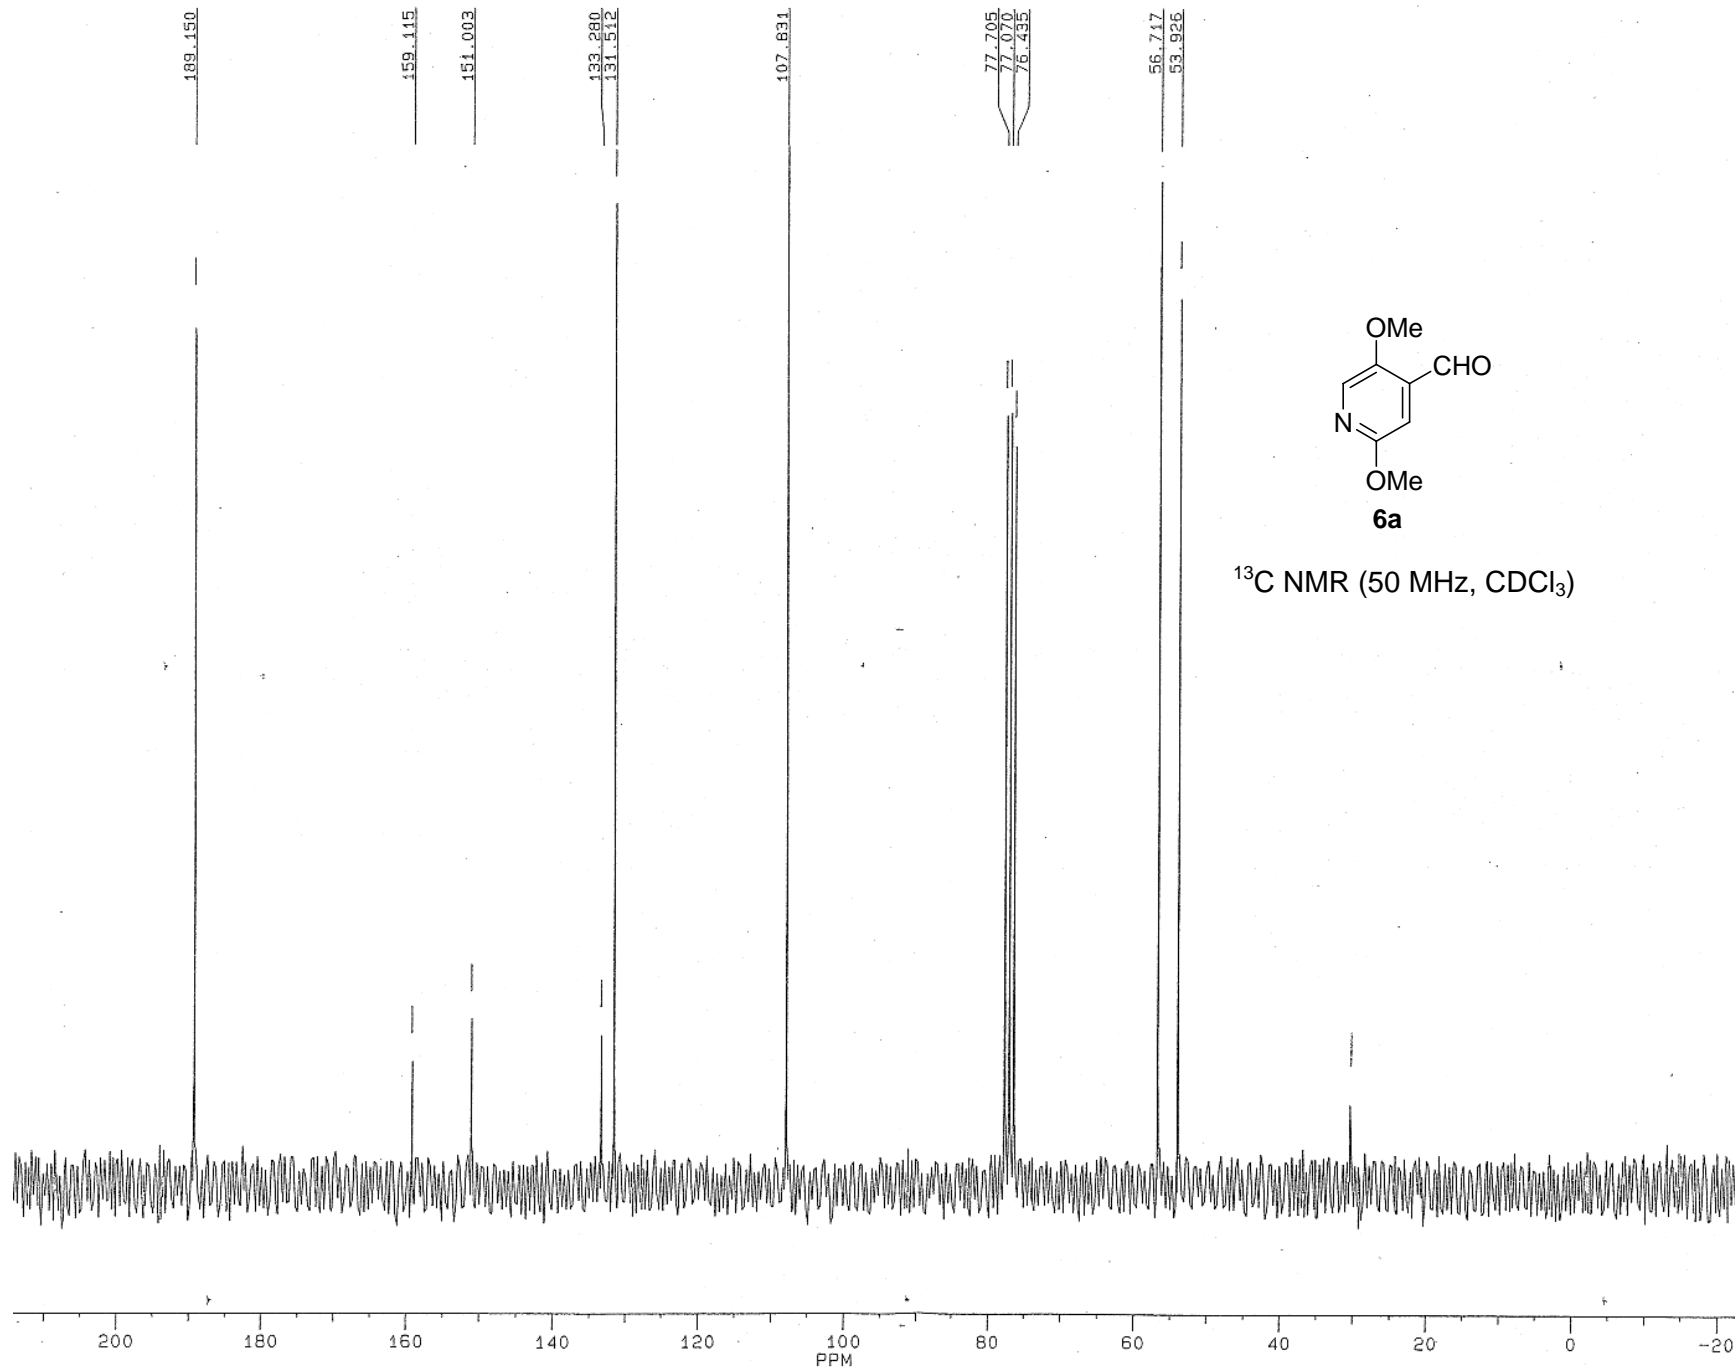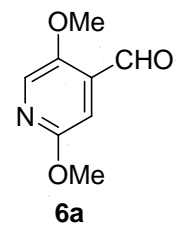

$^{13}\text{C}$  NMR (50 MHz,  $\text{CDCl}_3$ )

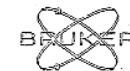

SR336F2C.07ME  
DATE 7-7-4  
TIME 15:12

SF 50.323  
SY 50.0  
Q1 8396.387  
SI 65536  
TD 65536  
SW 12500.000  
HZ/PT .381

PW 6.0  
RD 2.000  
AQ 2.621  
RG 400  
NS 560  
TE 297

FW 15700  
Q2 3154.531  
DP 15H CPD

LB 1.000  
GB 0.0  
CX 35.00  
CY 20.00  
F1 225.342P  
F2 -23.044P  
HZ/CM 357.132  
PPM/CM 7.097  
SR 3314.07

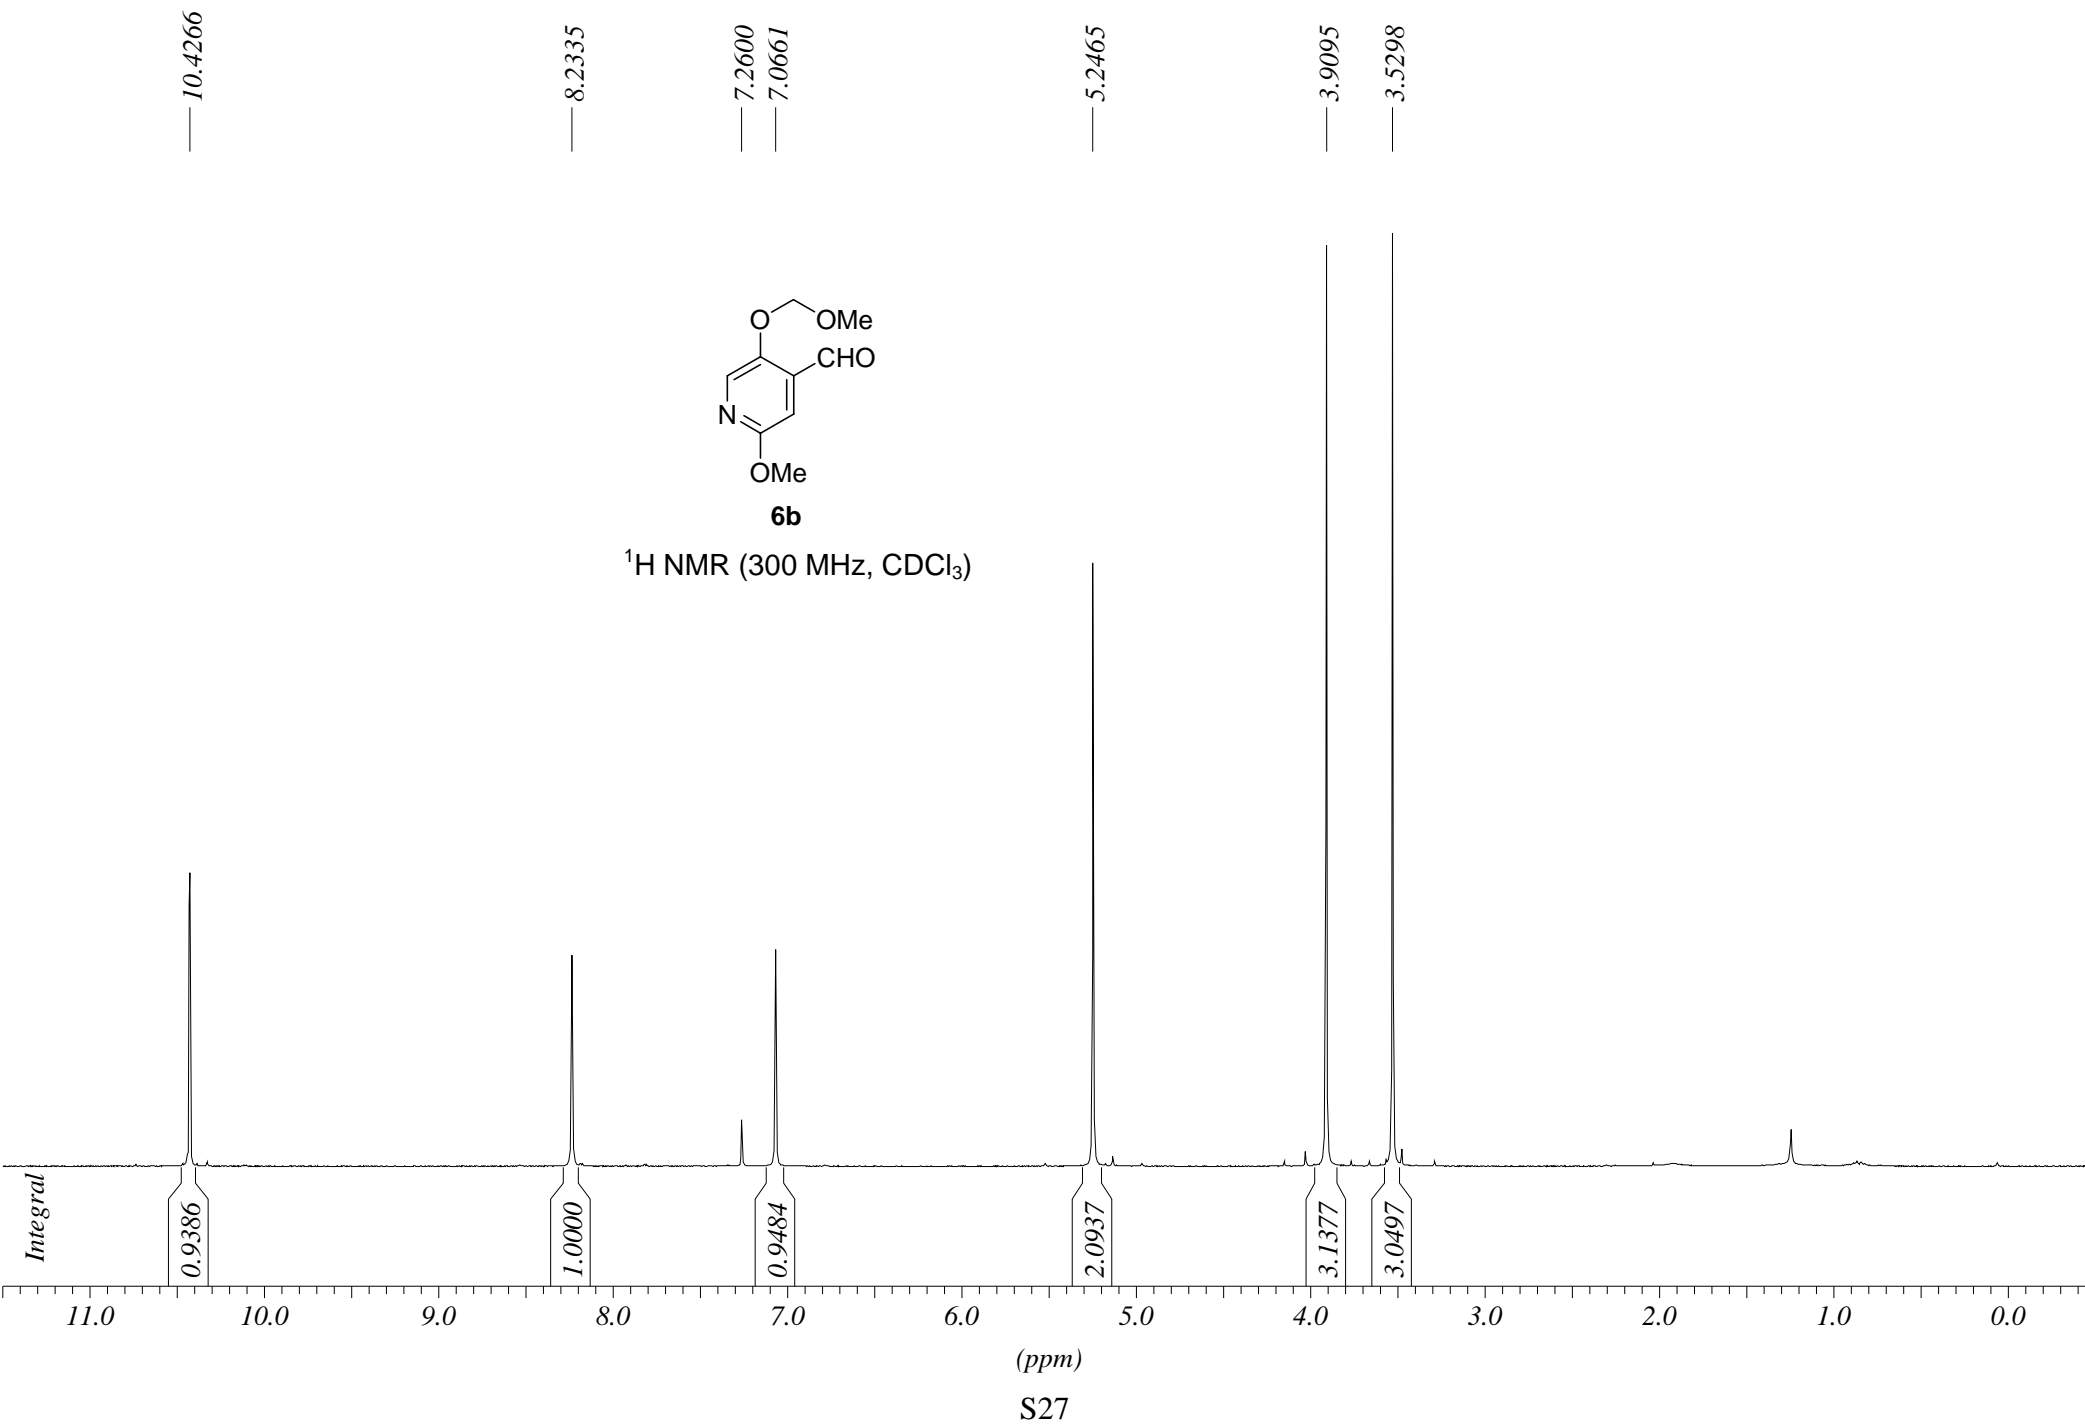

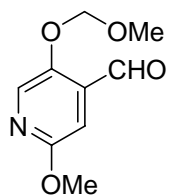

**6b**

$^{13}\text{C}$  NMR (75 MHz,  $\text{CDCl}_3$ )

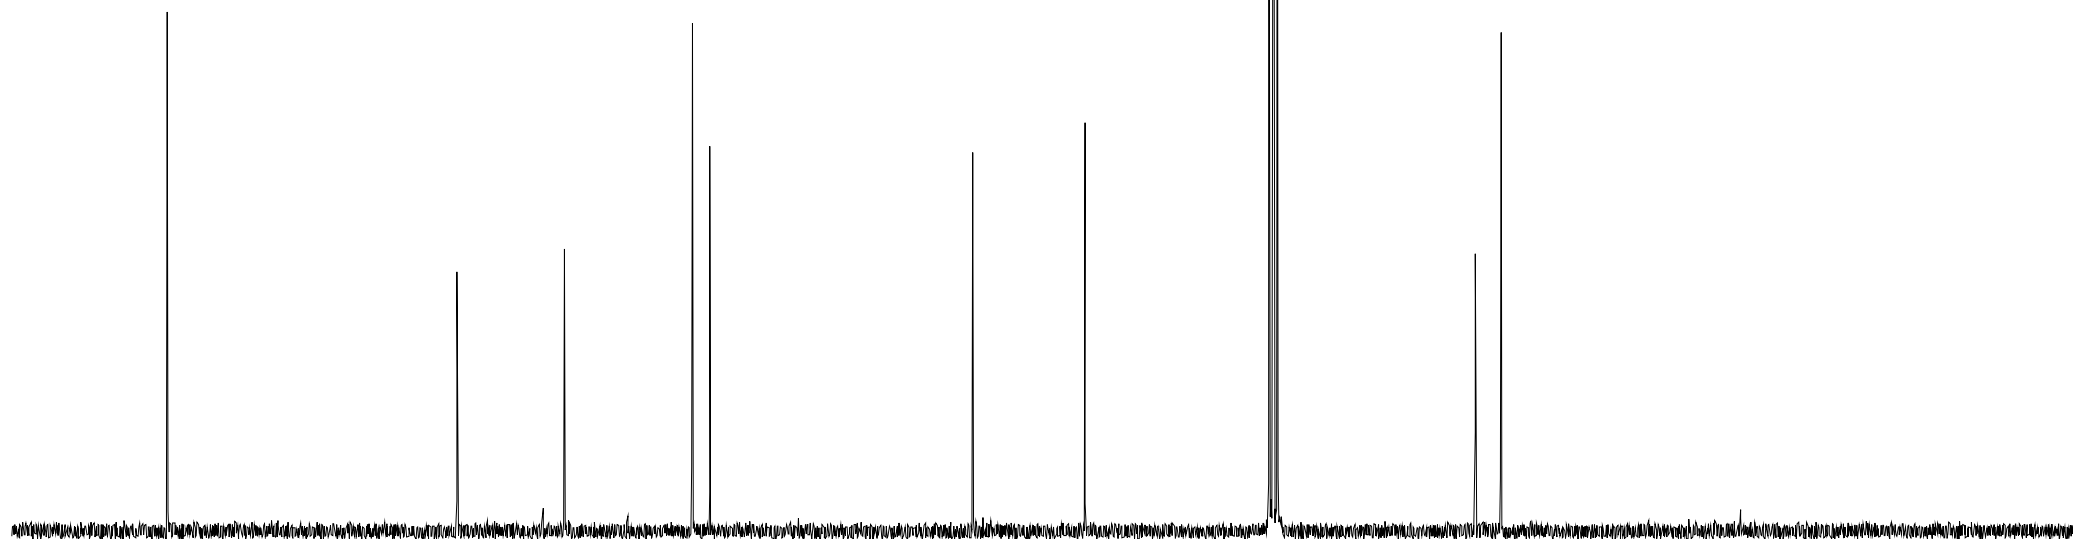

(ppm)

S28

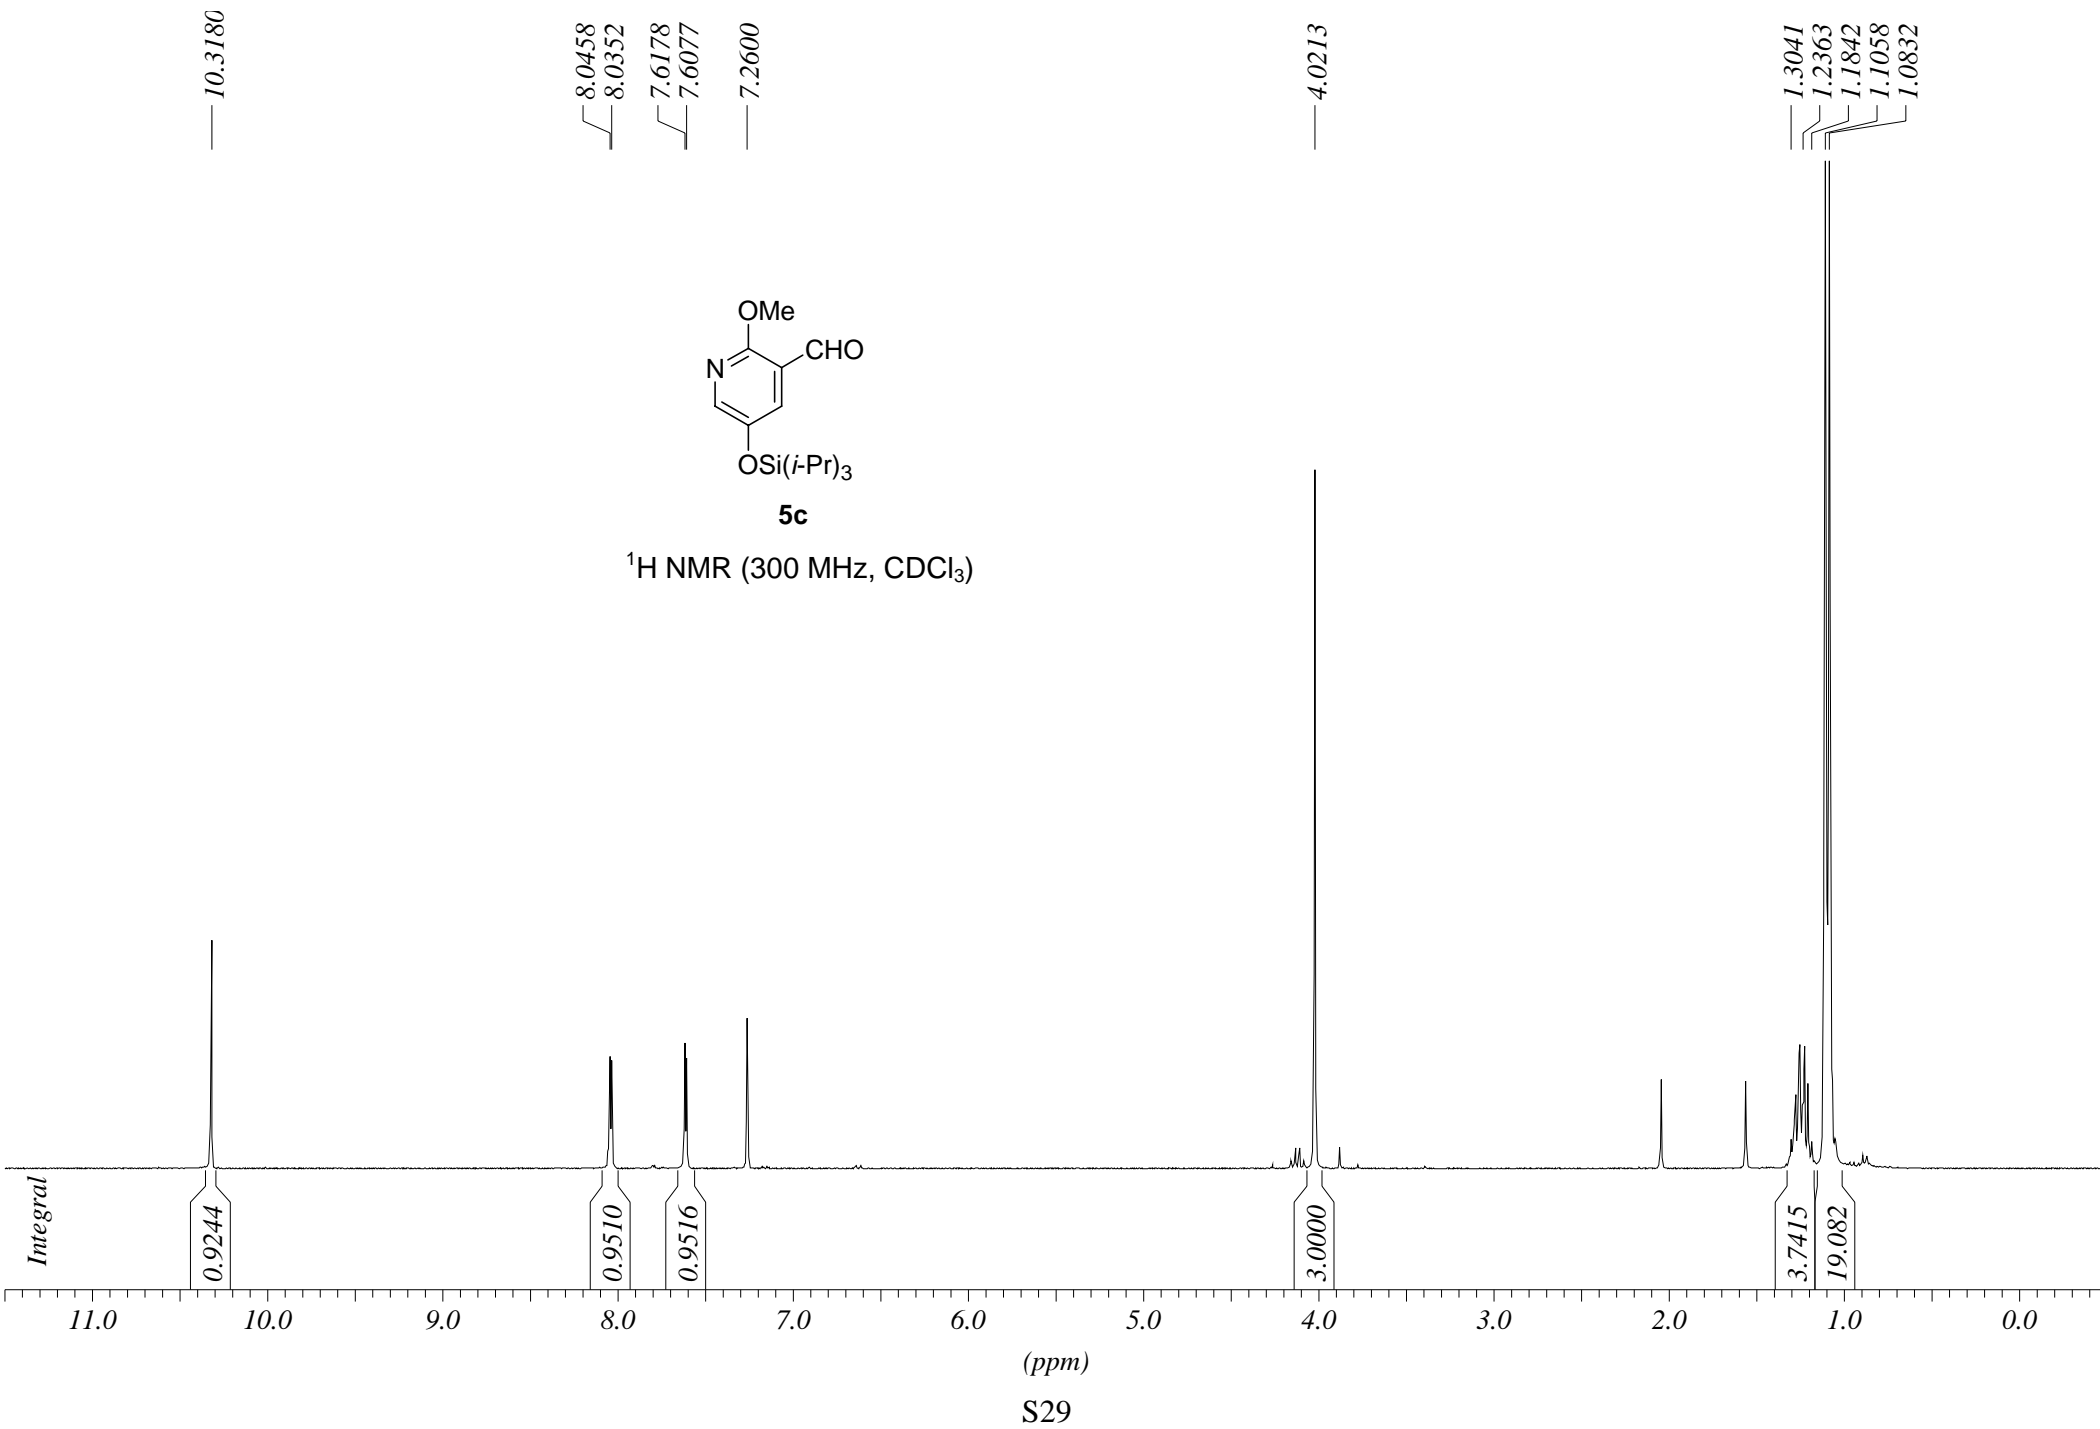

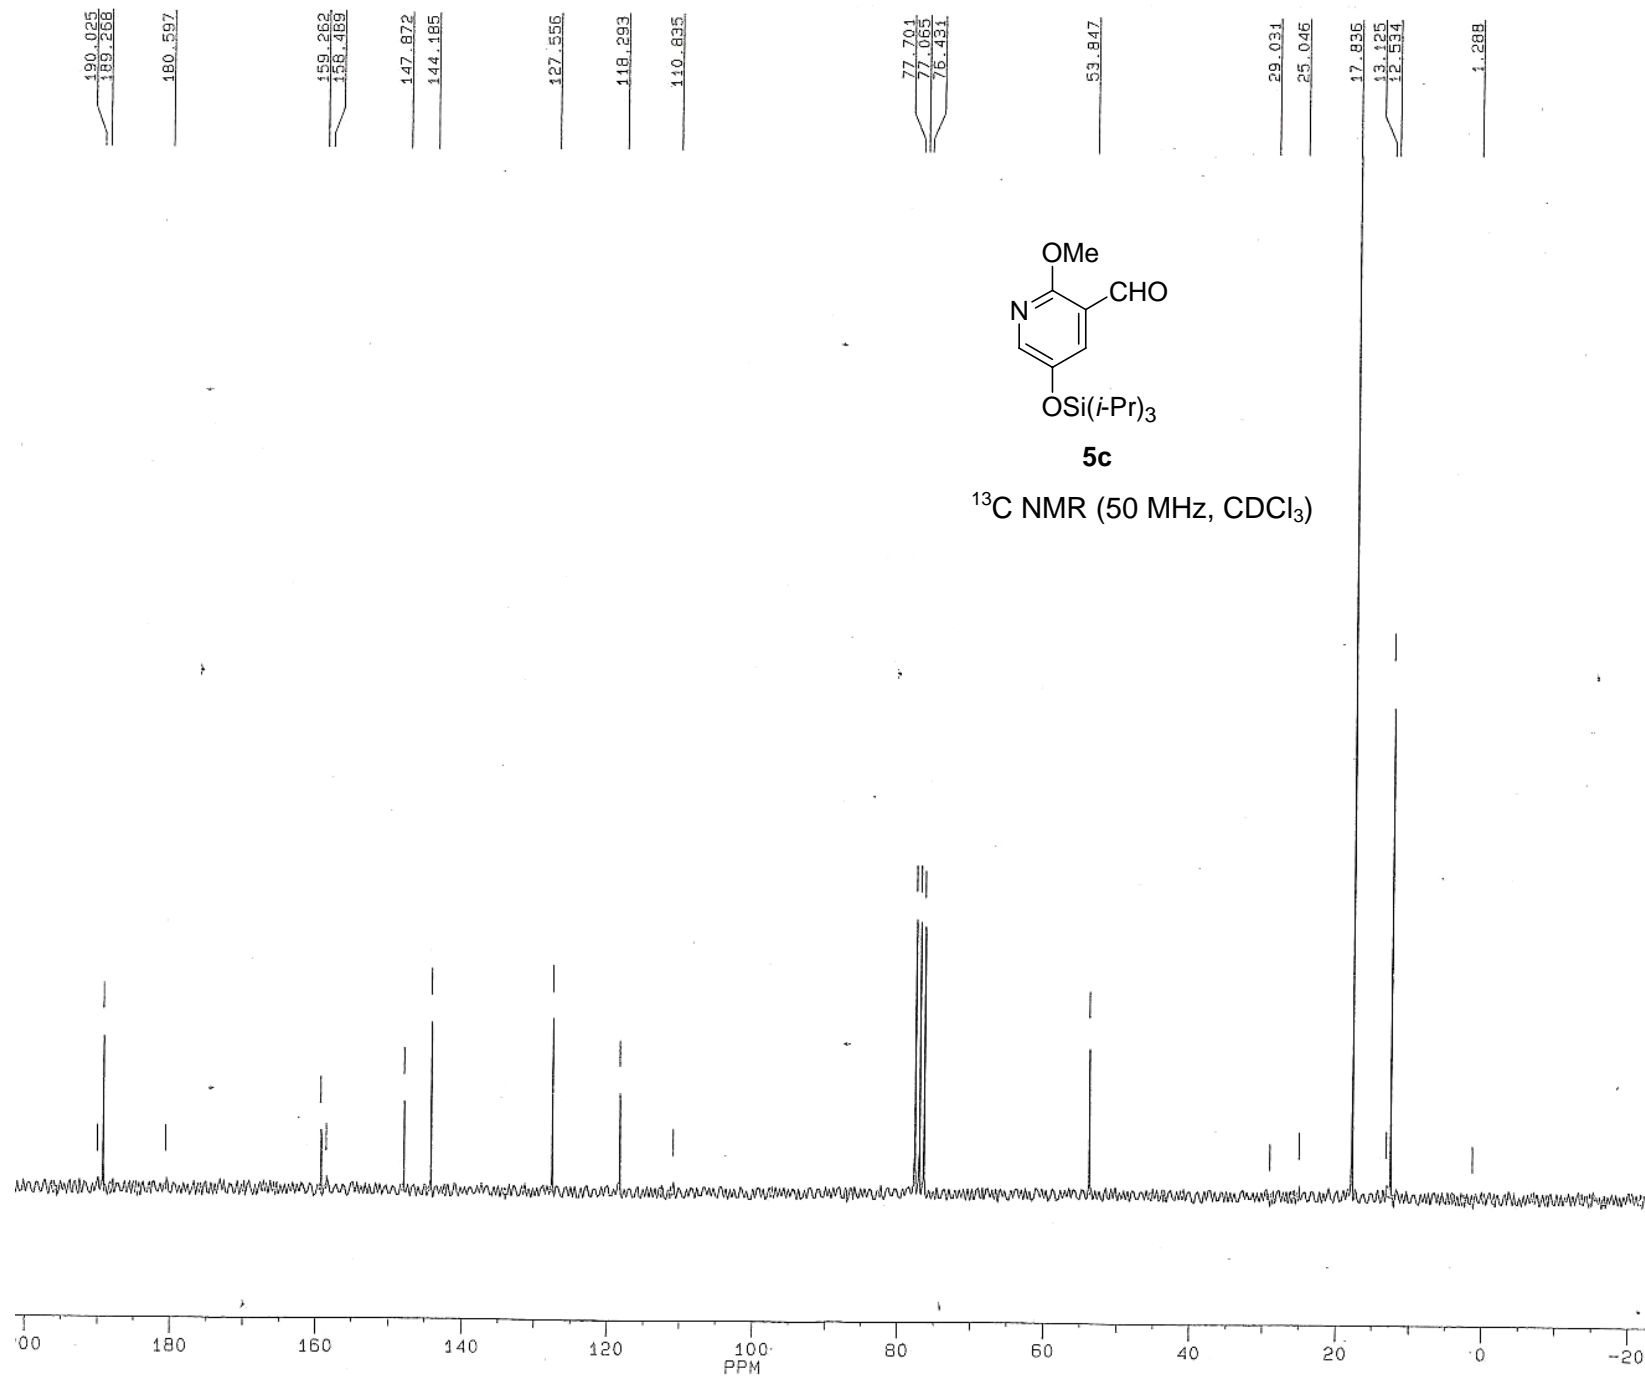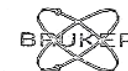

AV210F.110  
 AU PROG:  
 X02.AU  
 DATE 21-4-4  
 TIME 14:30

SF 50.323  
 SY 50.0  
 O1 8396.387  
 SI 65536  
 TD 65536  
 SW 12500.000  
 HZ/PT .381

PW 0.0  
 RD 0.0  
 AQ 2.621  
 RG 640  
 NS 512  
 TE 297

FW 15700  
 O2 3154.531  
 DP 15H D0

LB 1.000  
 GB 0.0  
 CX 35.00  
 CY 20.00  
 F1 225.4631  
 F2 -23.1661  
 HZ/CM 357.481  
 PPM/CM 7.104  
 SR 3314.07

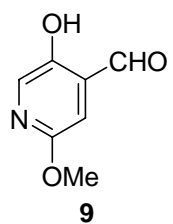

<sup>1</sup>H NMR (300 MHz, CDCl<sub>3</sub>)

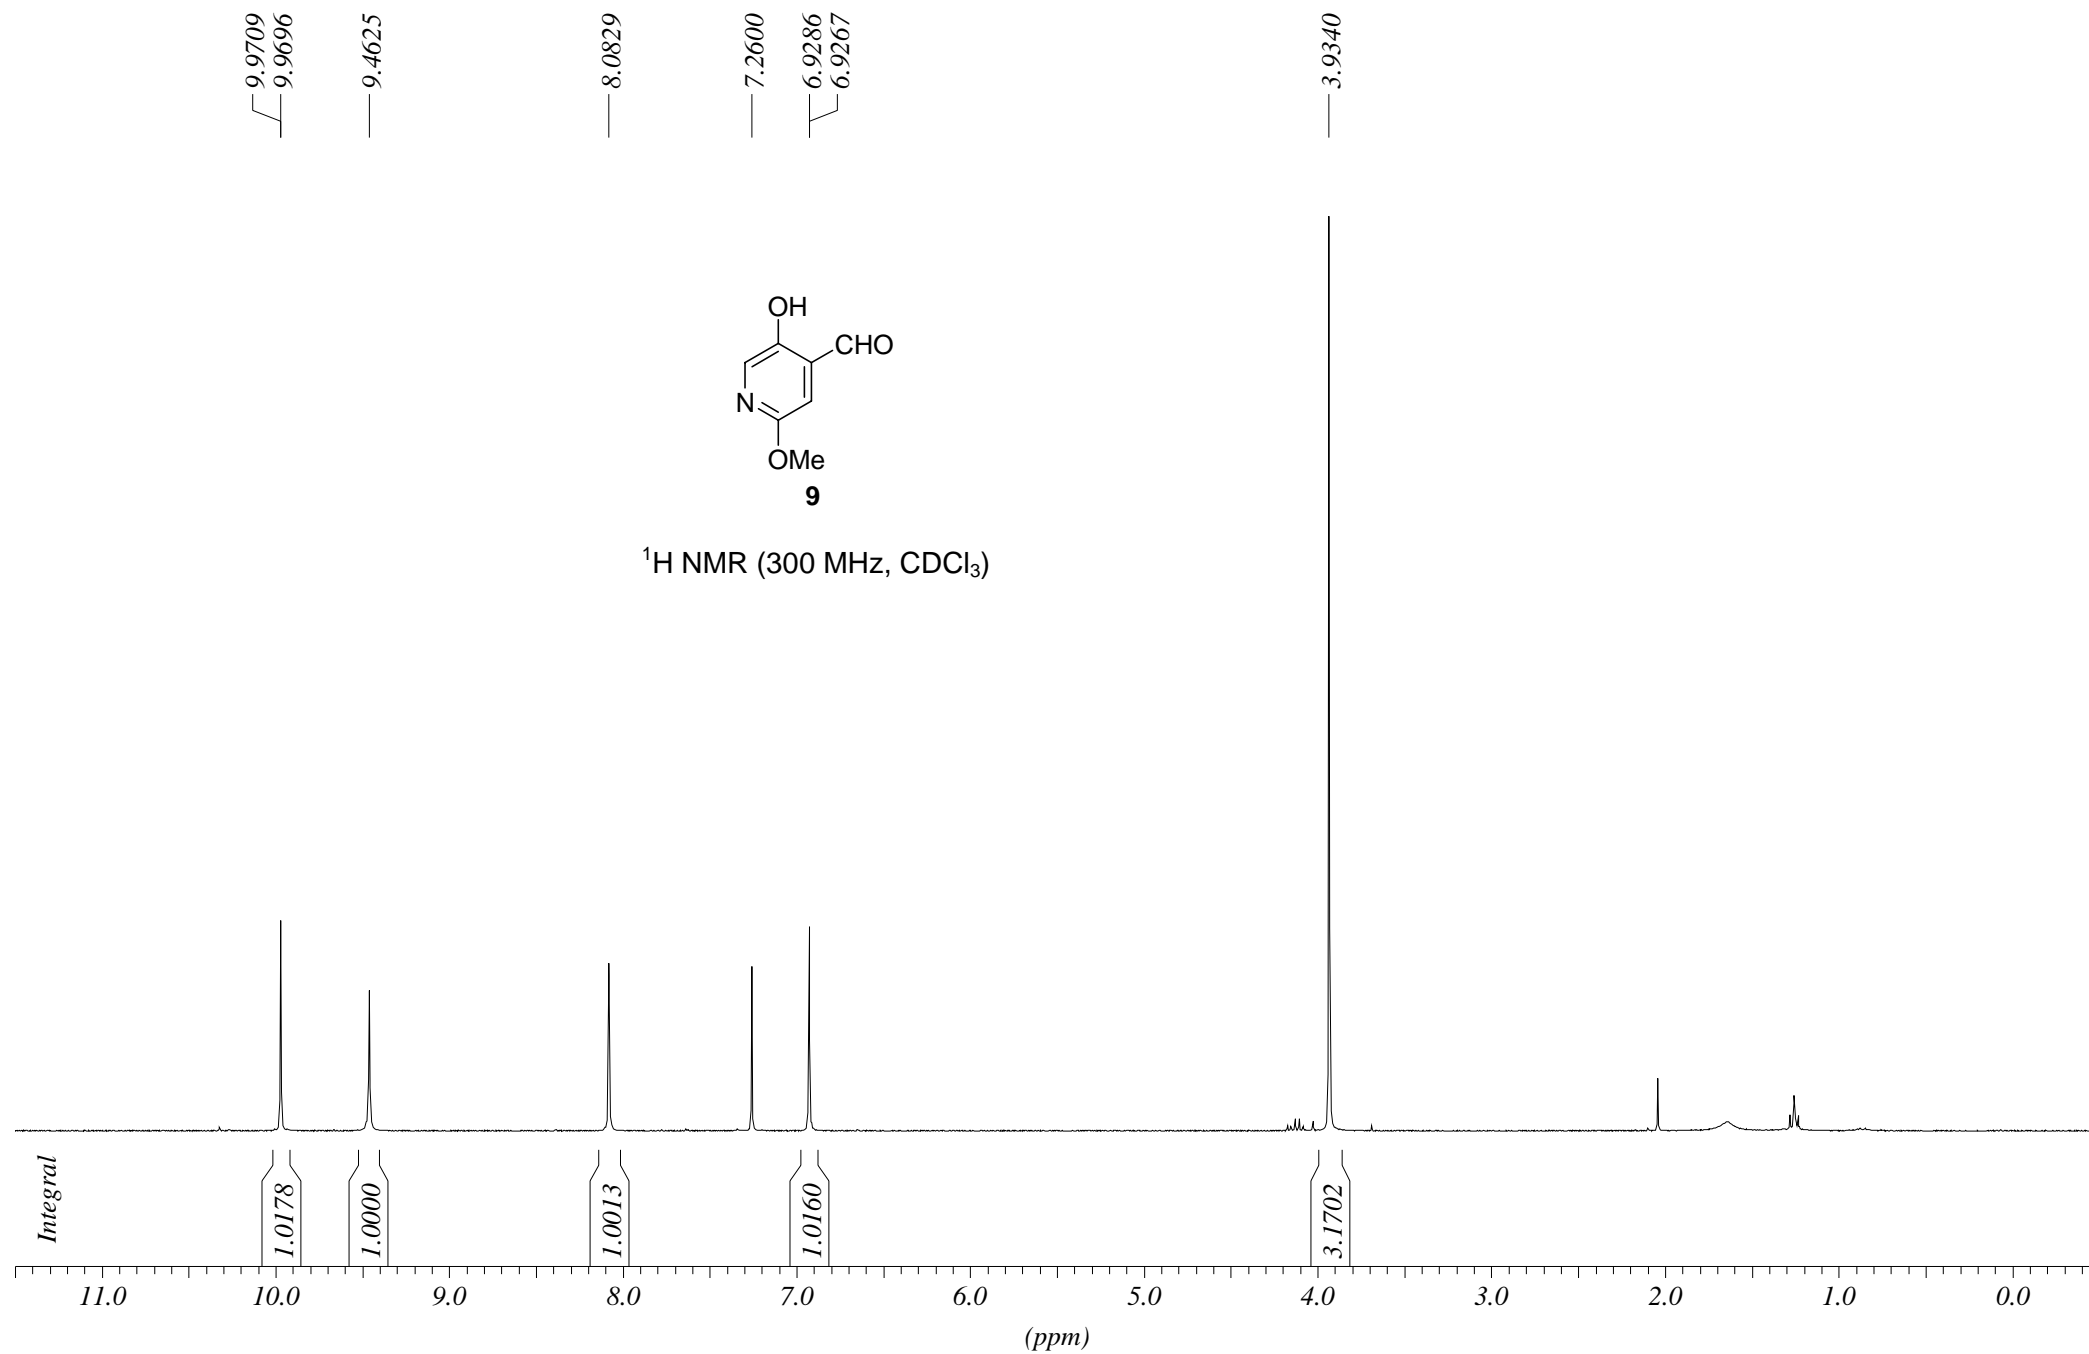

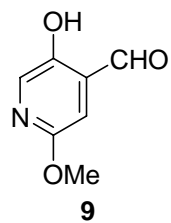

<sup>13</sup>C NMR (75 MHz, CDCl<sub>3</sub>)

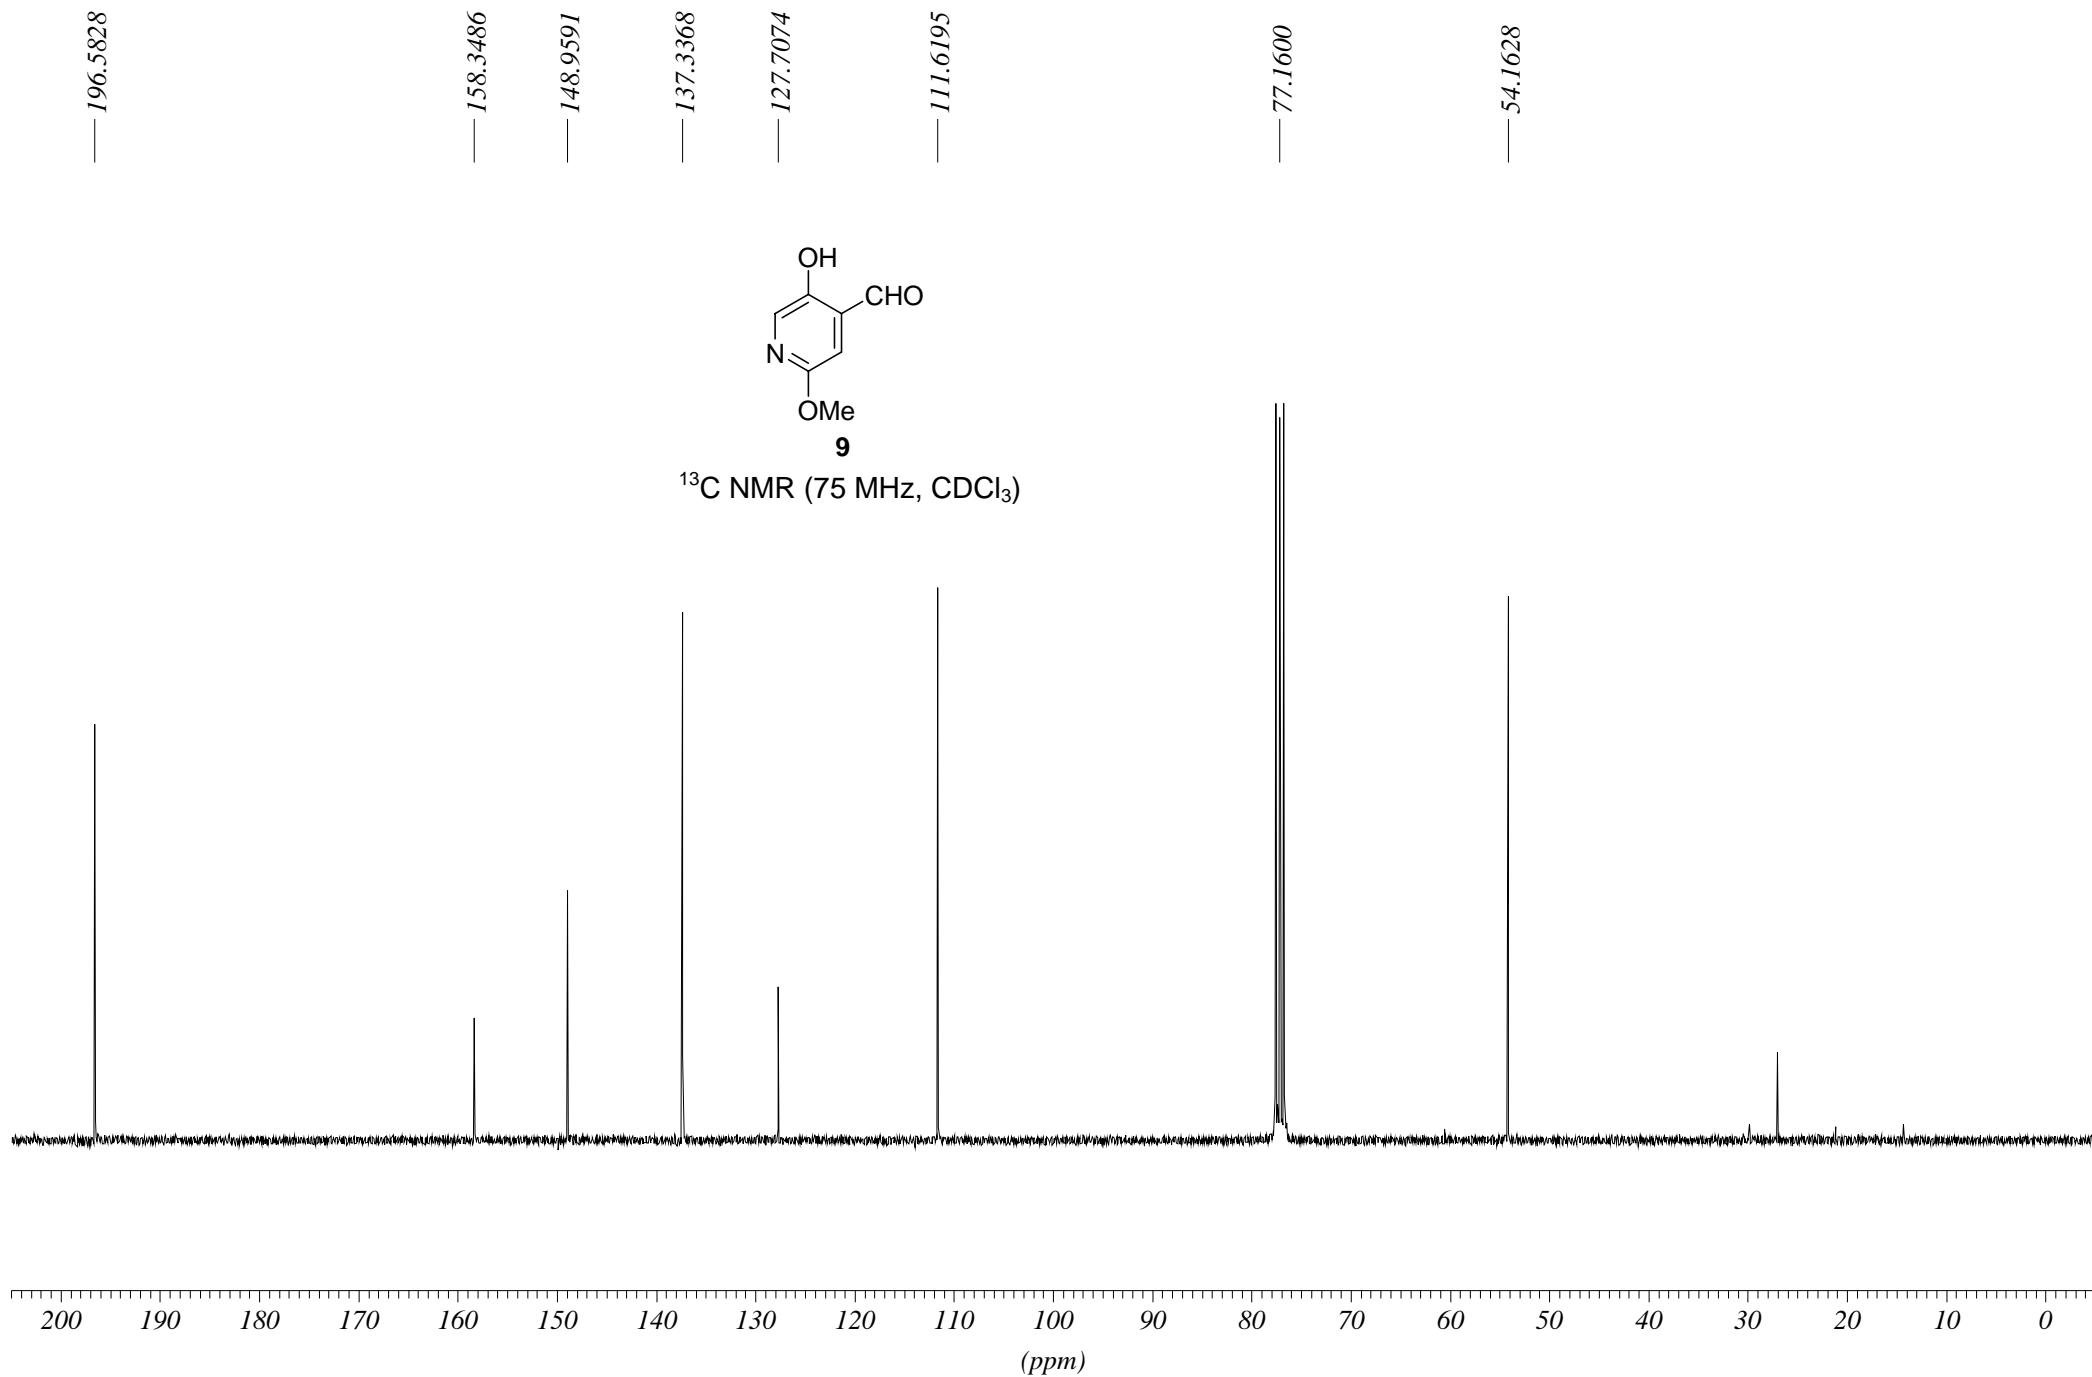



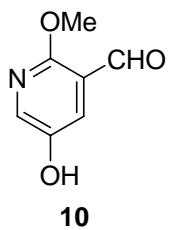

<sup>1</sup>H NMR (300 MHz, CDCl<sub>3</sub>)

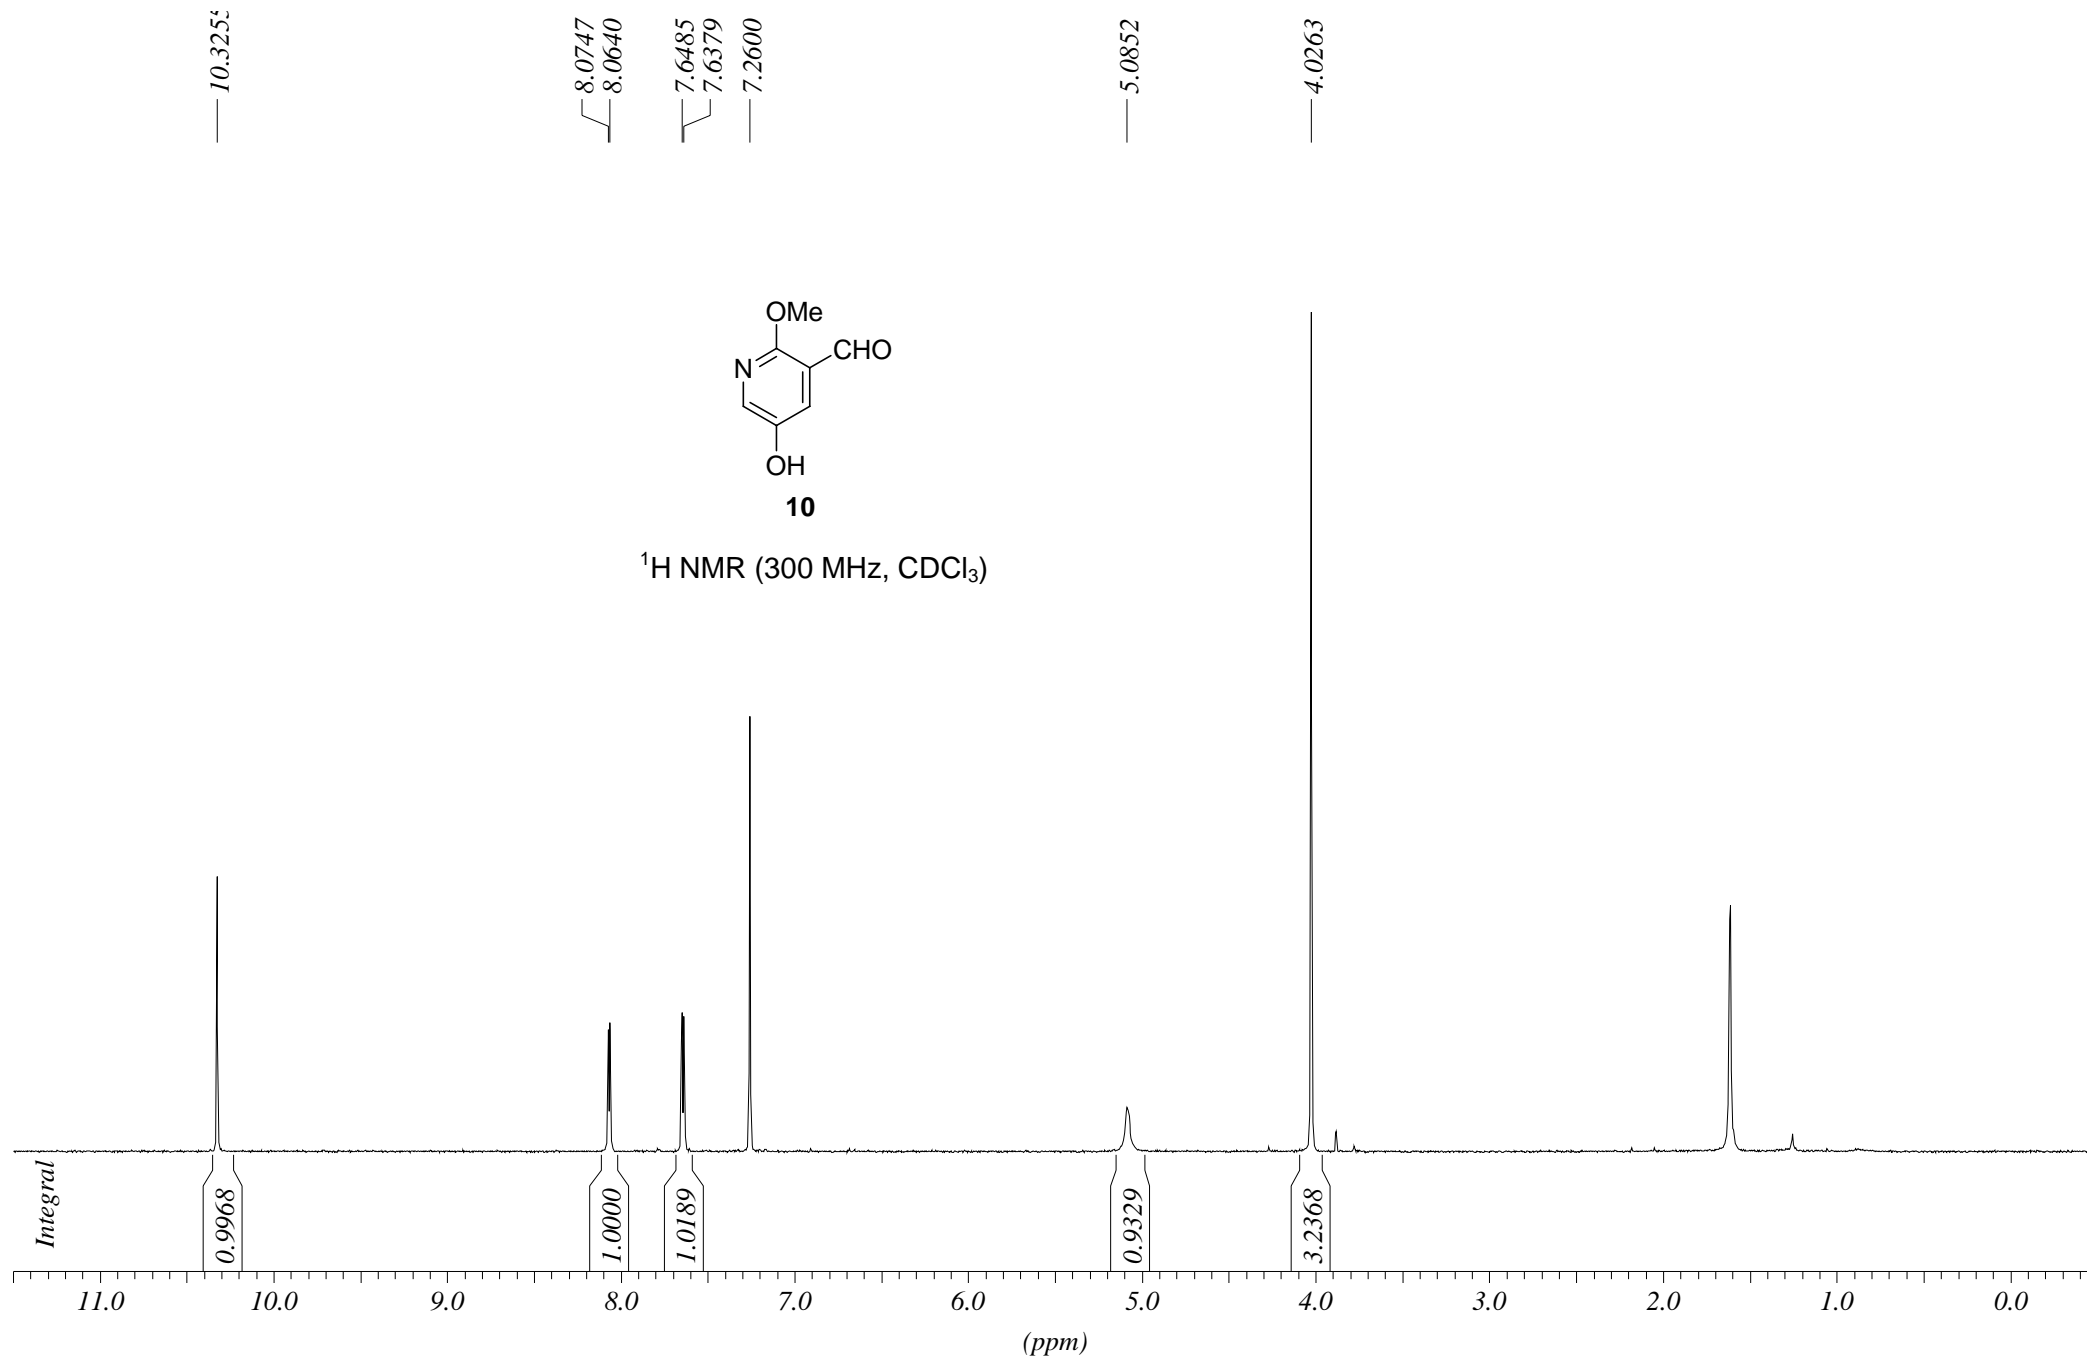

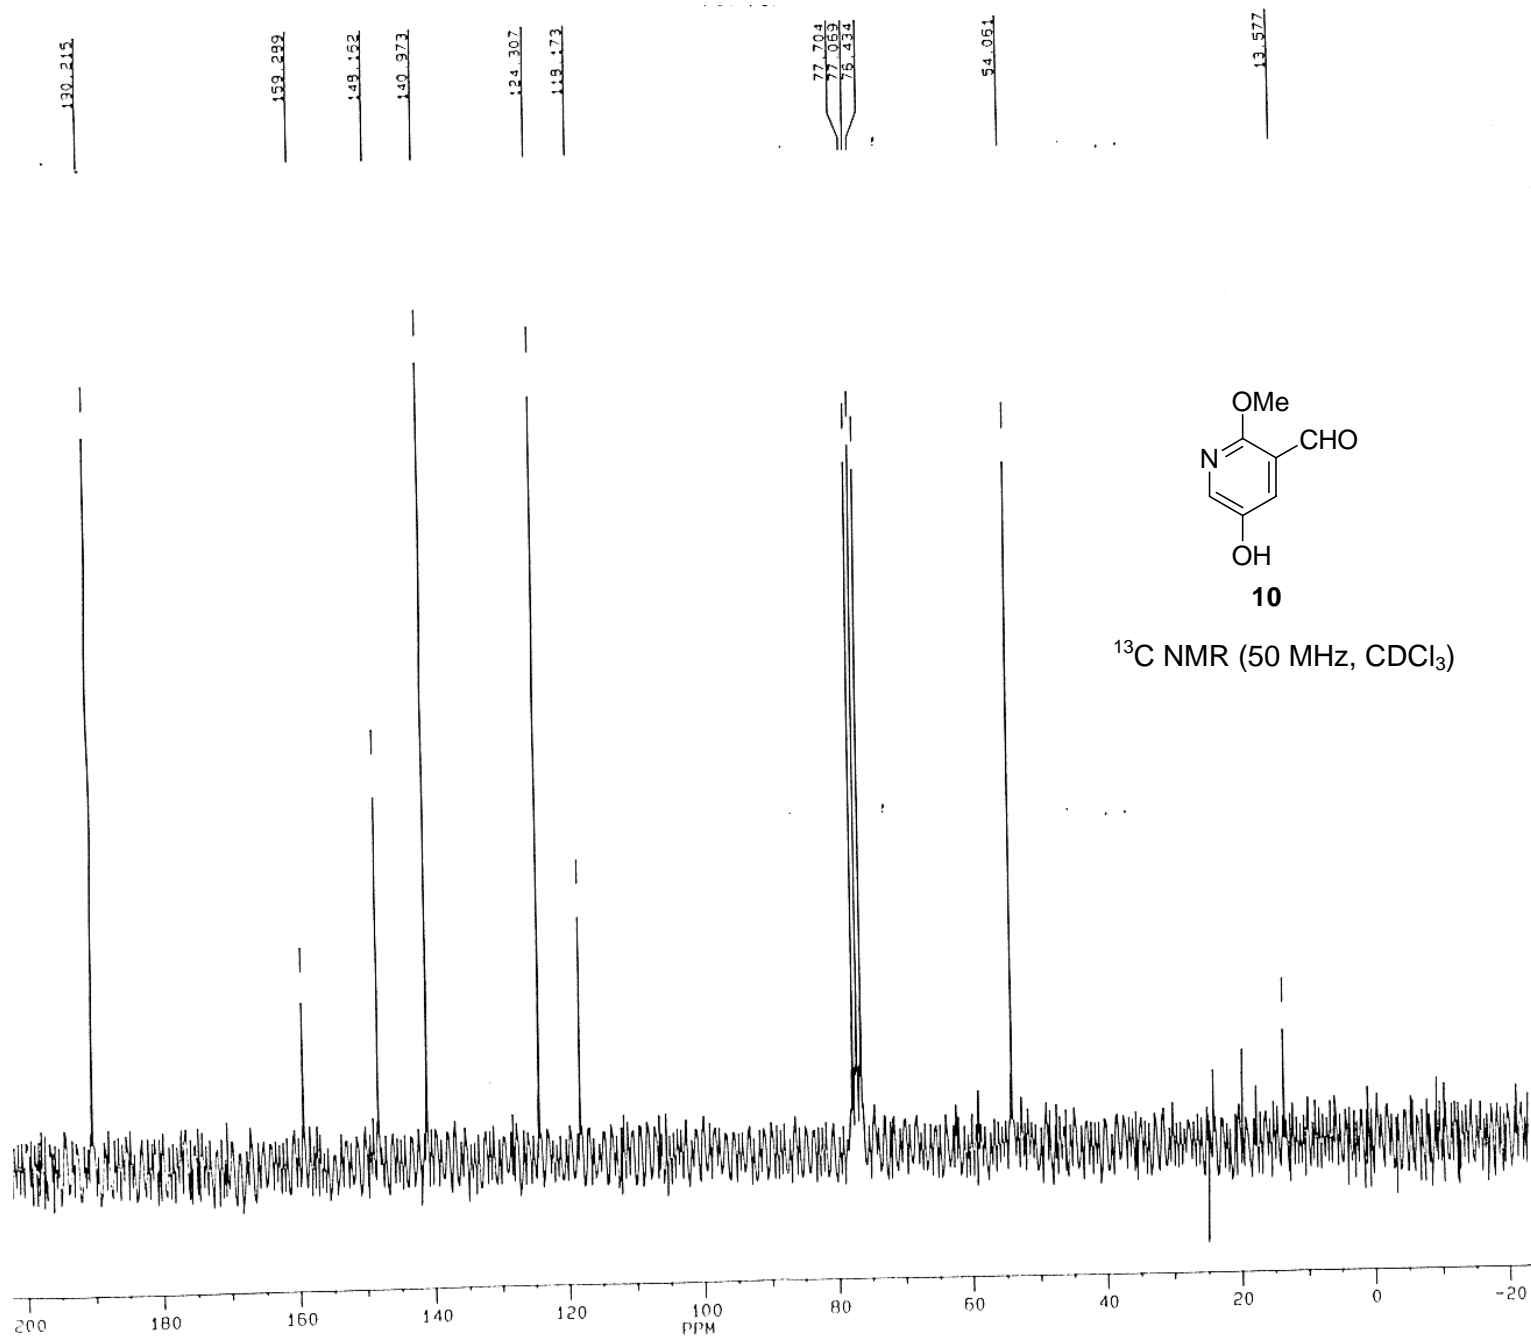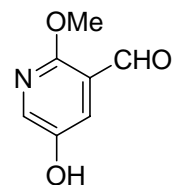

10

<sup>13</sup>C NMR (50 MHz, CDCl<sub>3</sub>)

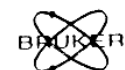

15VE  
DATE 20-3-4  
TIME 16:12  
SF 50.323  
SY 50.0  
O1 8396.387  
SI 65536  
TD 65536  
SW 12500.000  
HZ/PT .381  
PW 6.0  
RD 2.000  
AQ 2.621  
RG 400  
NS 512  
TE 297  
FW 15700  
Q2 3154.531  
DP 15H CPD  
LB 1.000  
GB 0.0  
CX 35.00  
CY 15.00  
F1 225.342P  
F2 -23.044P  
HZ/CM 357.132  
PPM/CM 7.037  
SR 3314.07

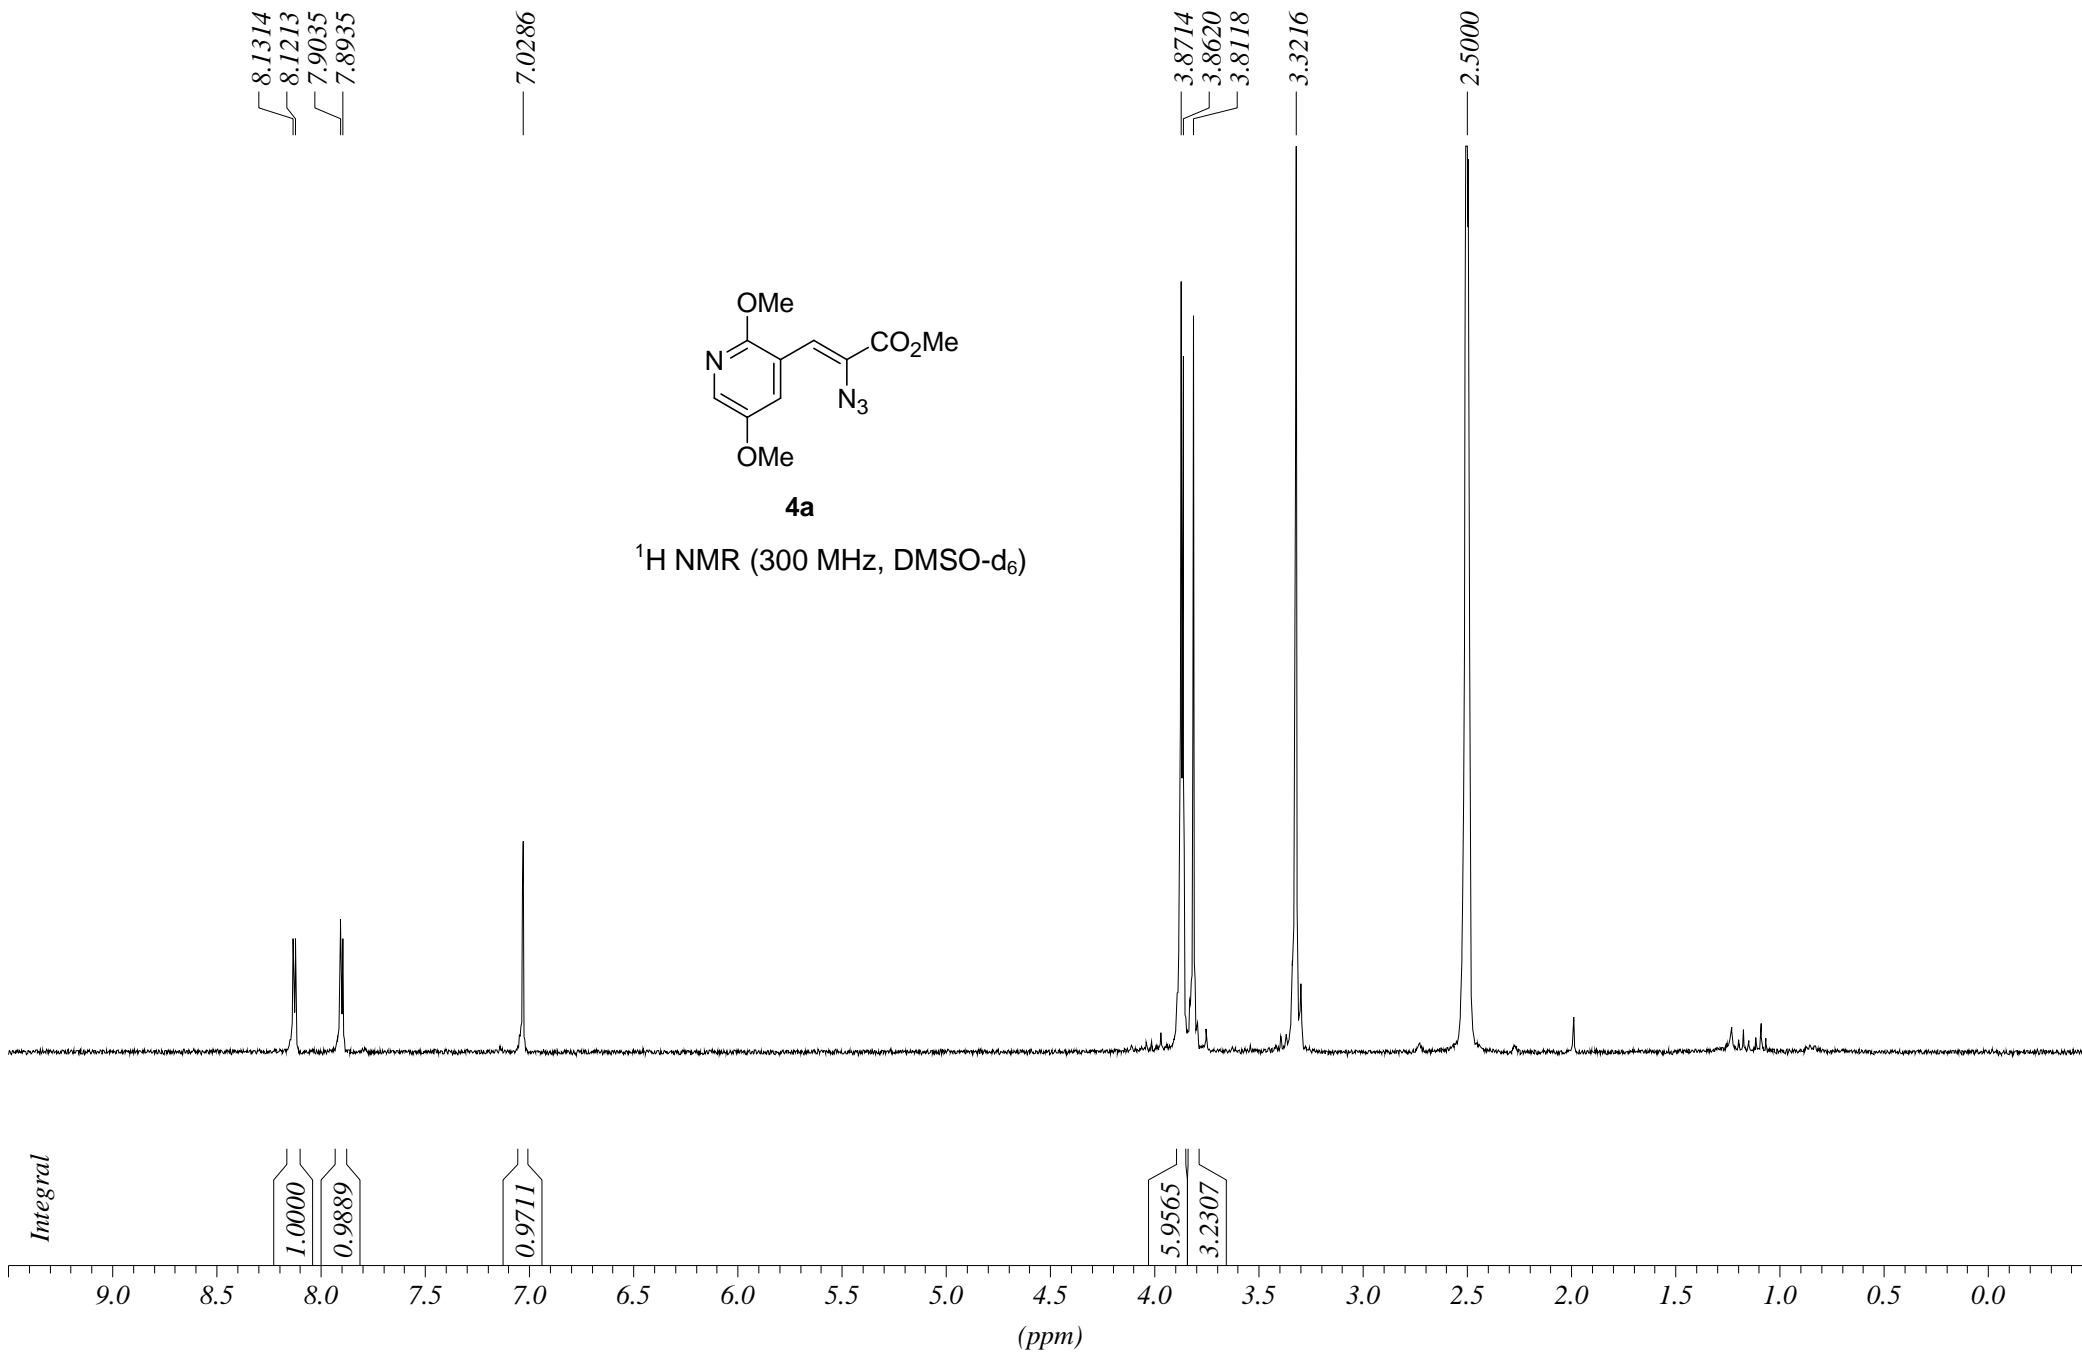

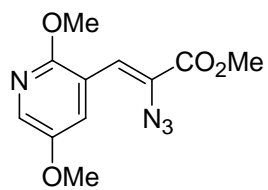

**4a**

$^{13}\text{C}$  NMR (75 MHz, DMSO- $\text{d}_6$ )

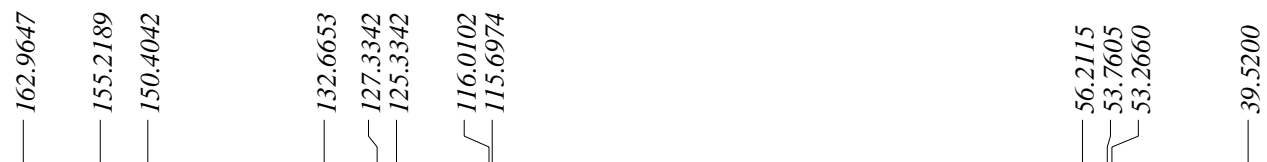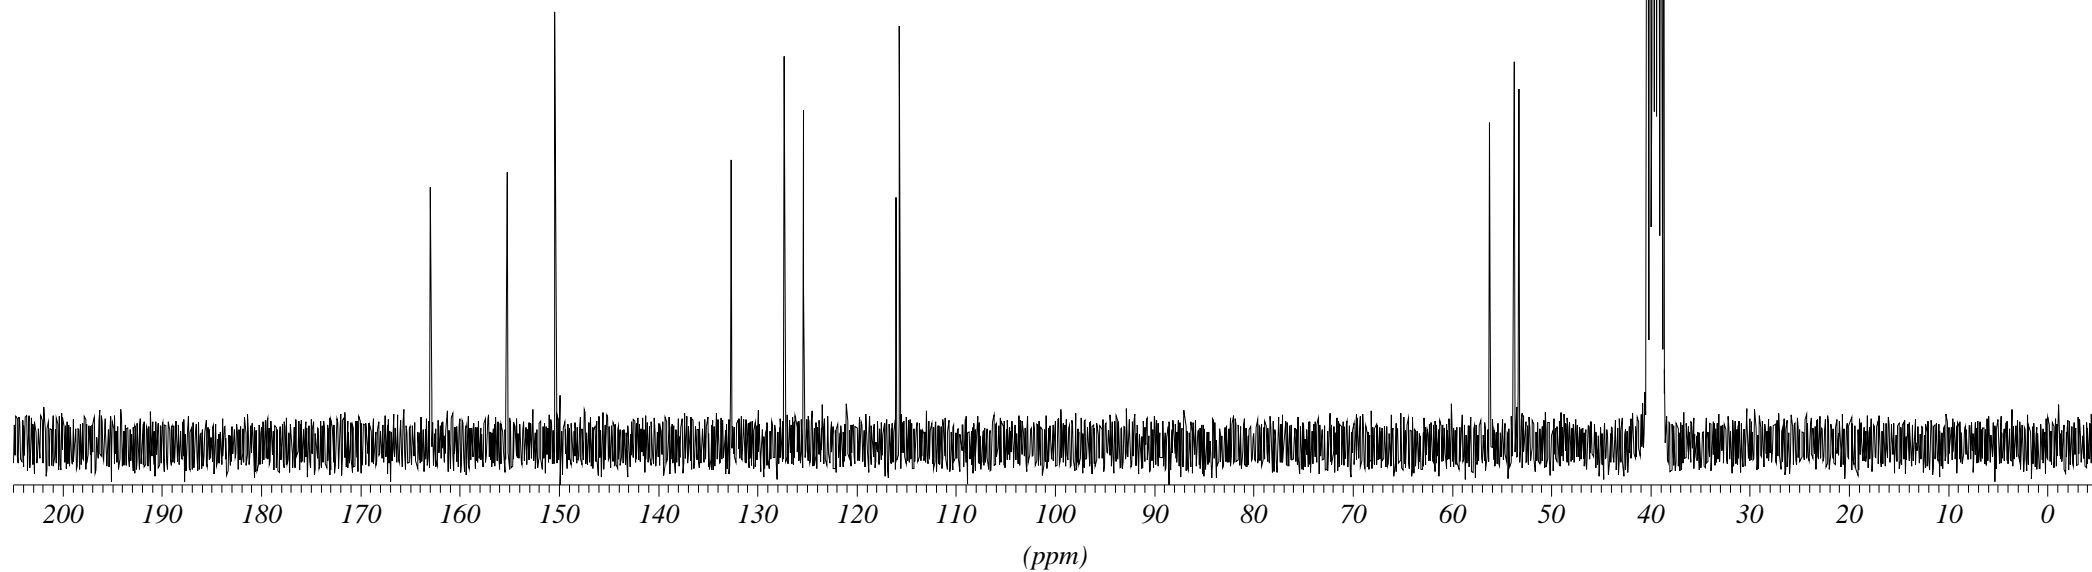

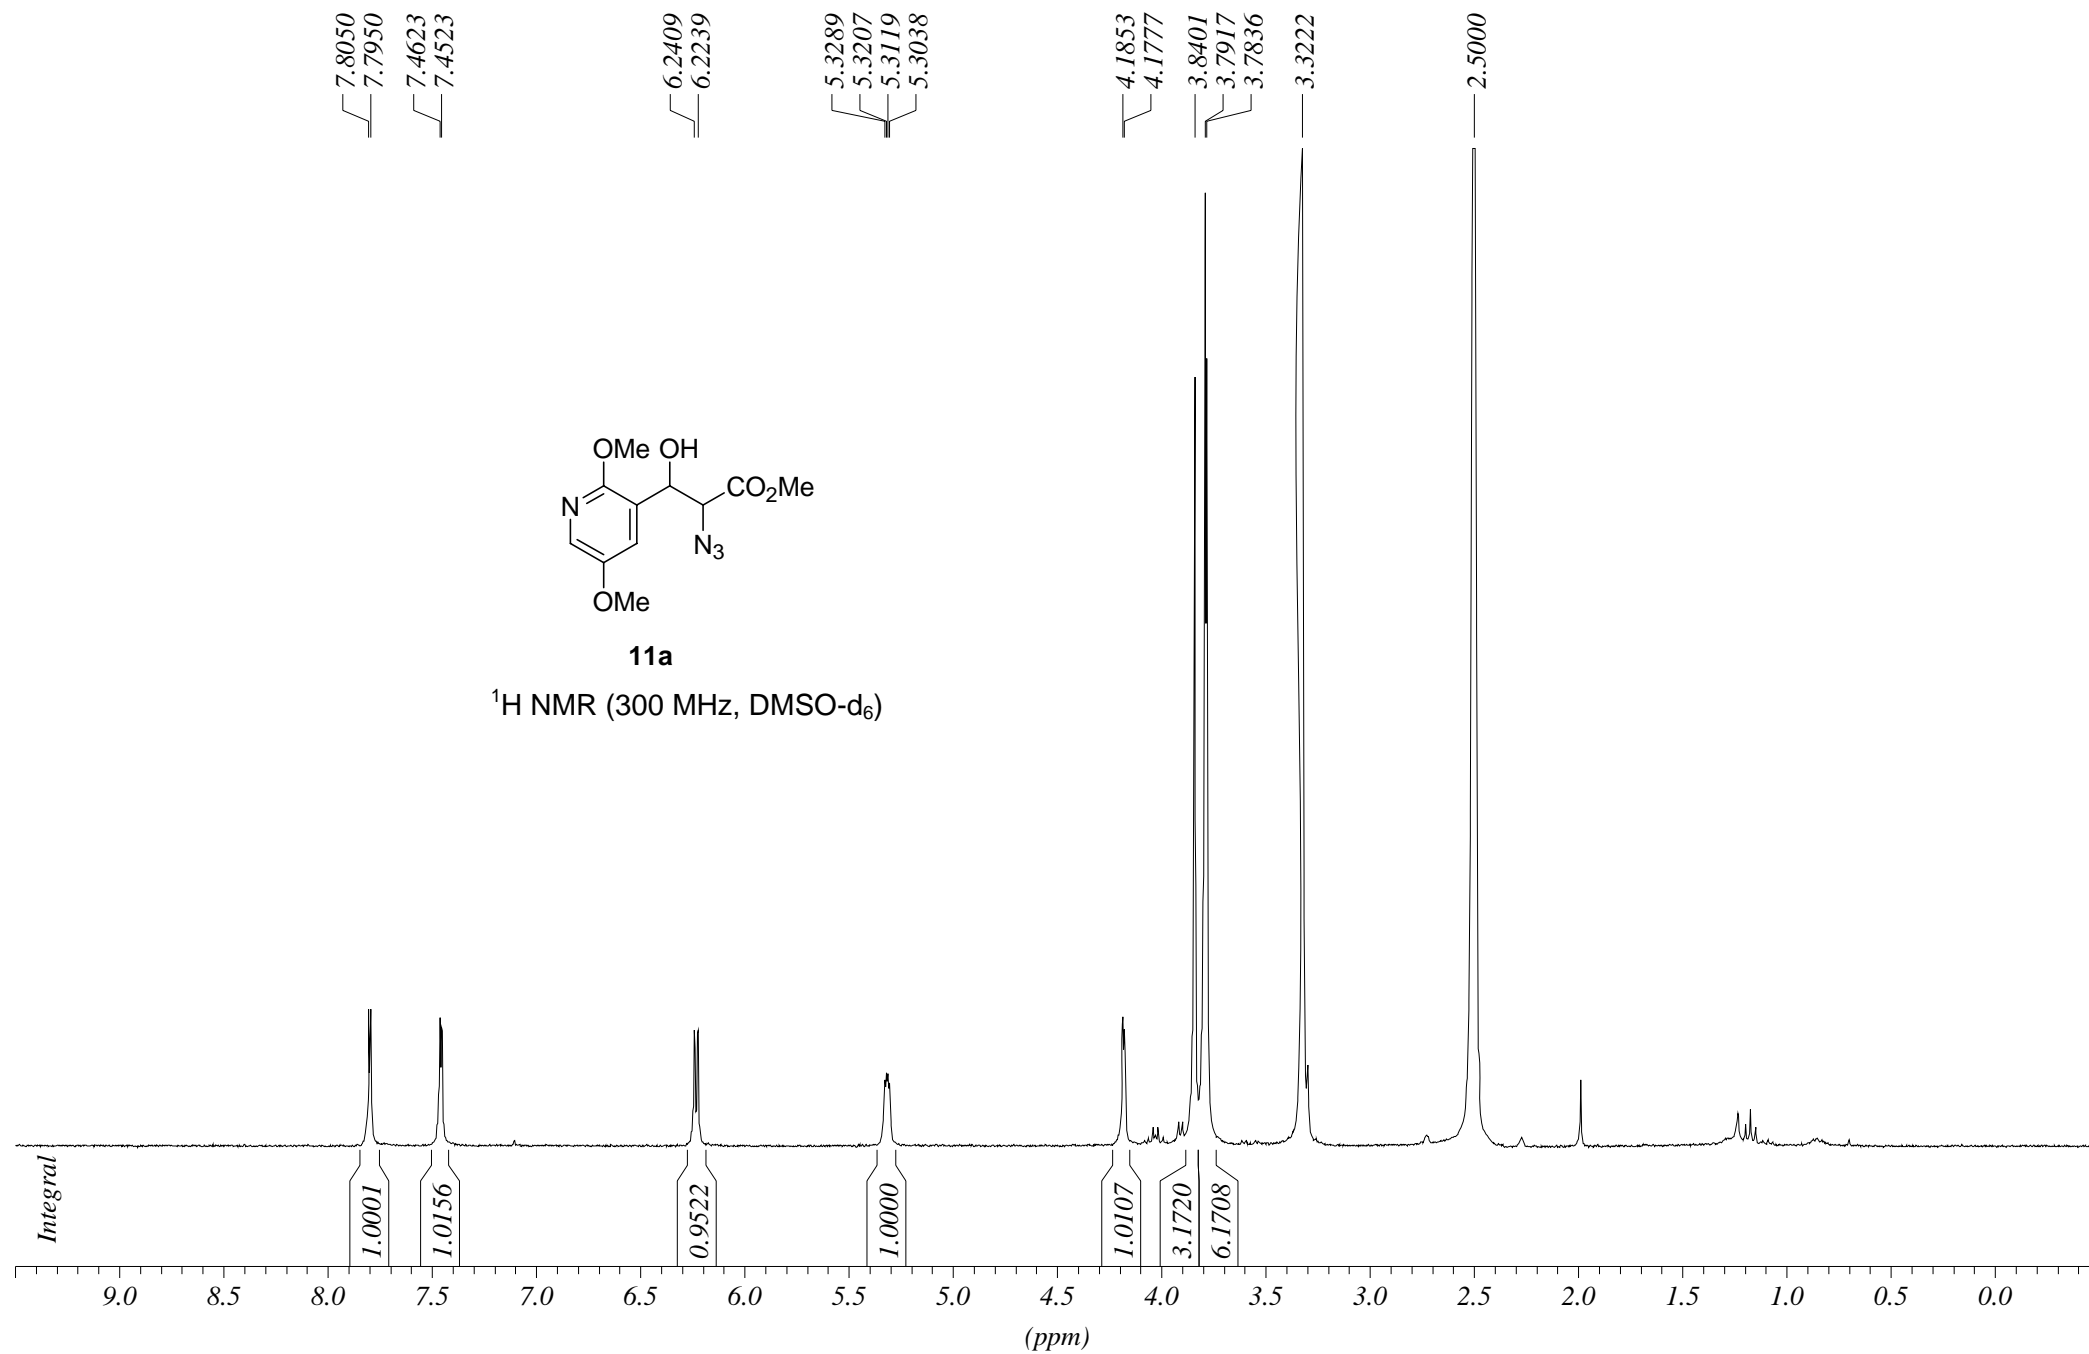

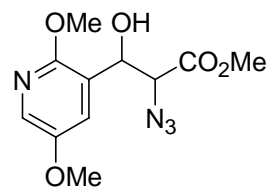

**11a**

$^{13}\text{C}$  NMR (75 MHz, DMSO- $\text{d}_6$ )

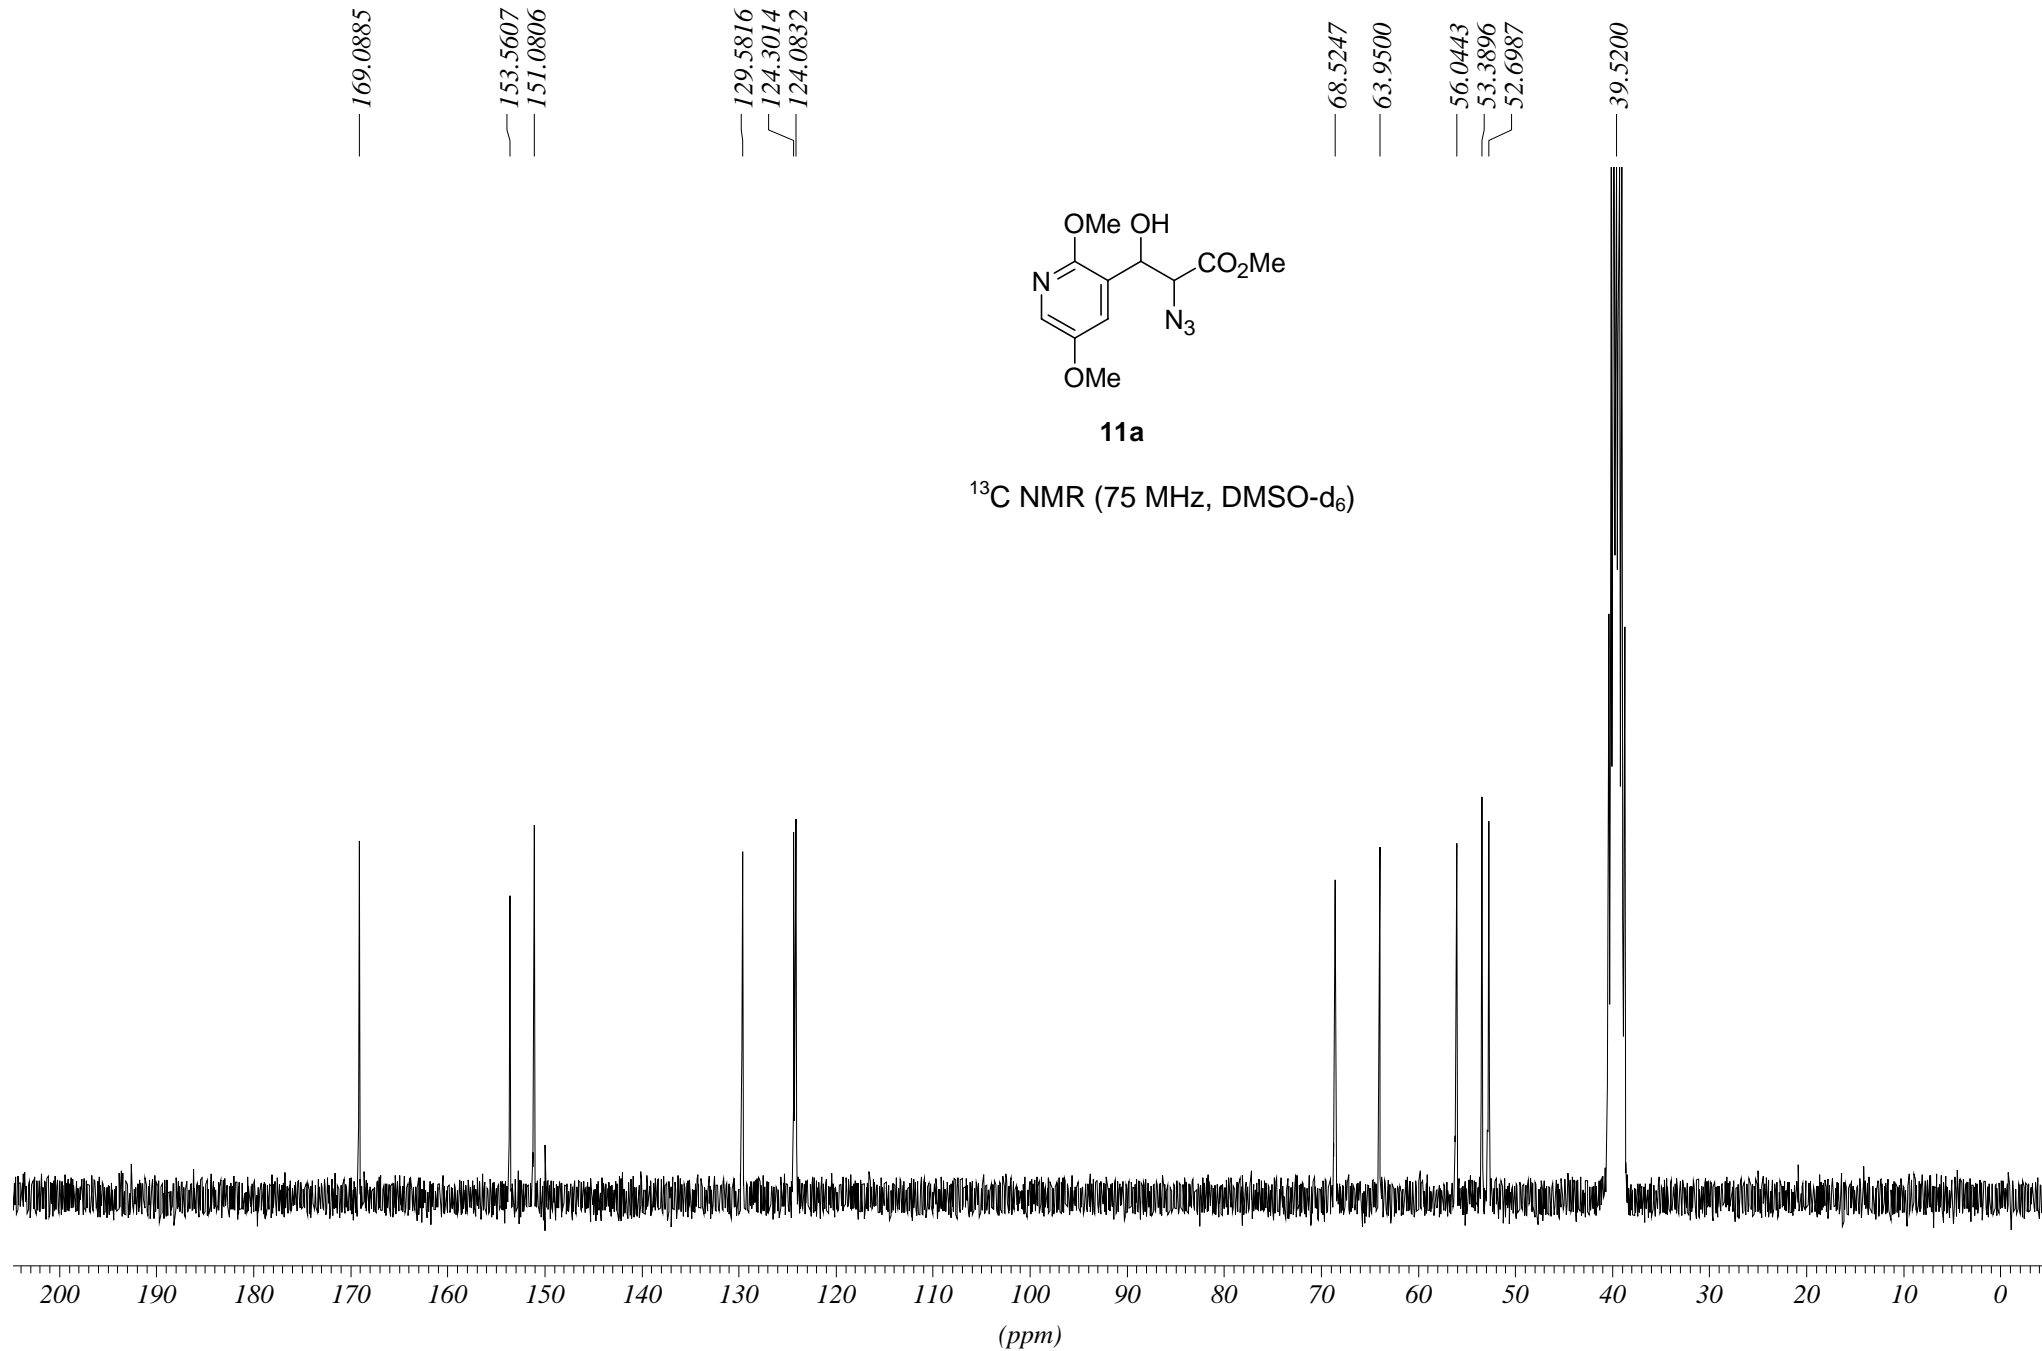

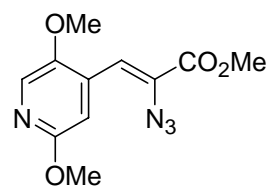

**4b**

<sup>1</sup>H NMR (300 MHz, acetone-d<sub>6</sub>)

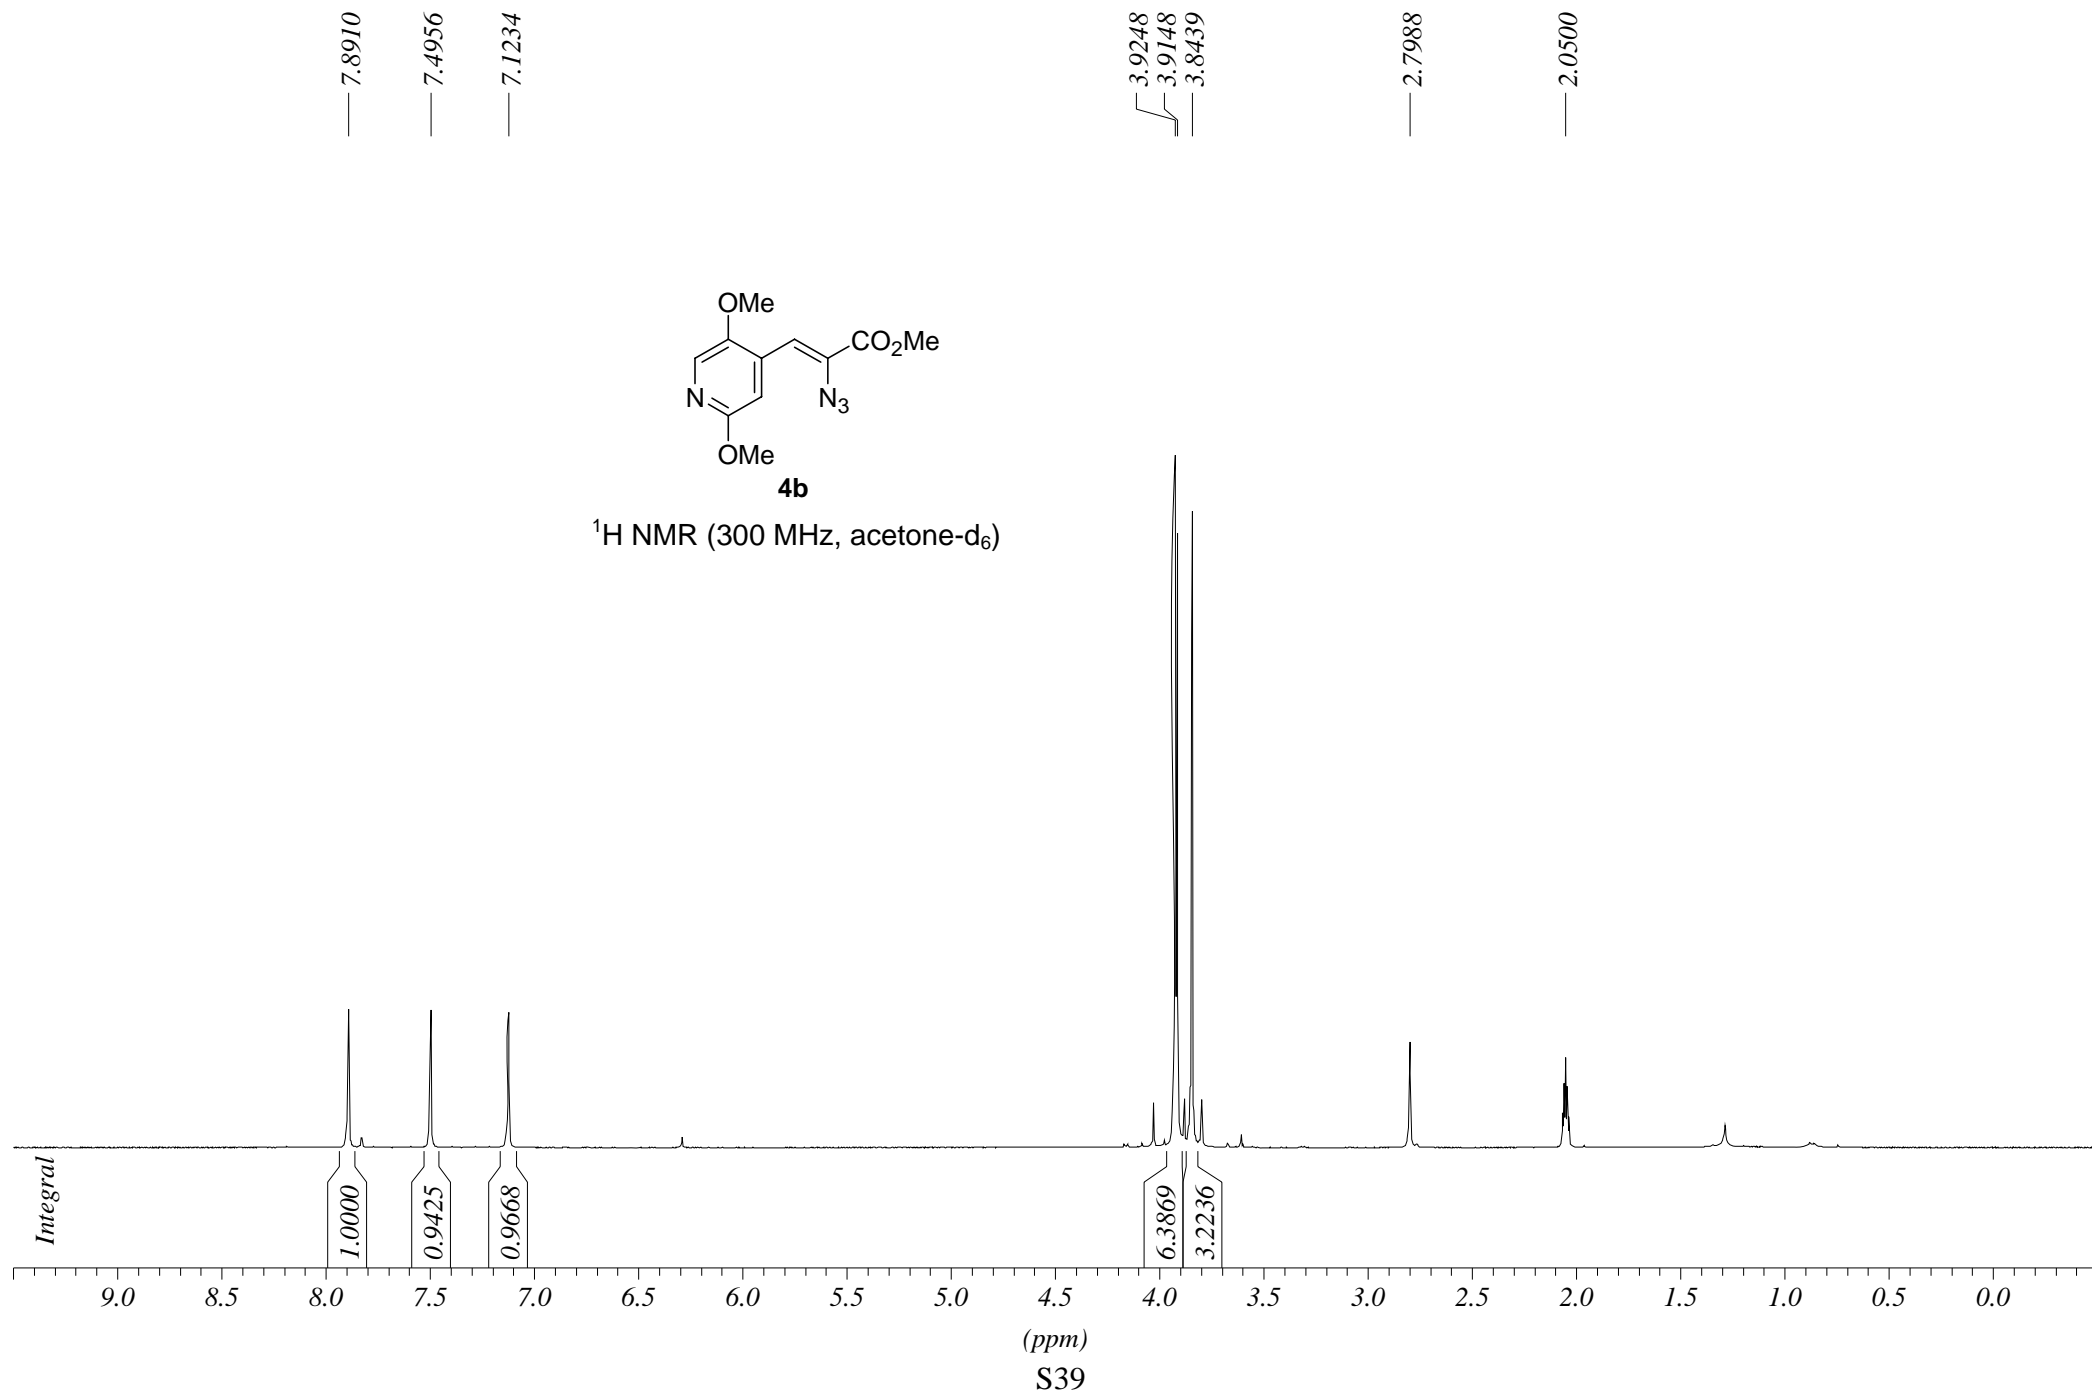

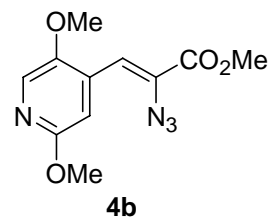

$^{13}\text{C}$  NMR (75 MHz, acetone- $\text{d}_6$ )

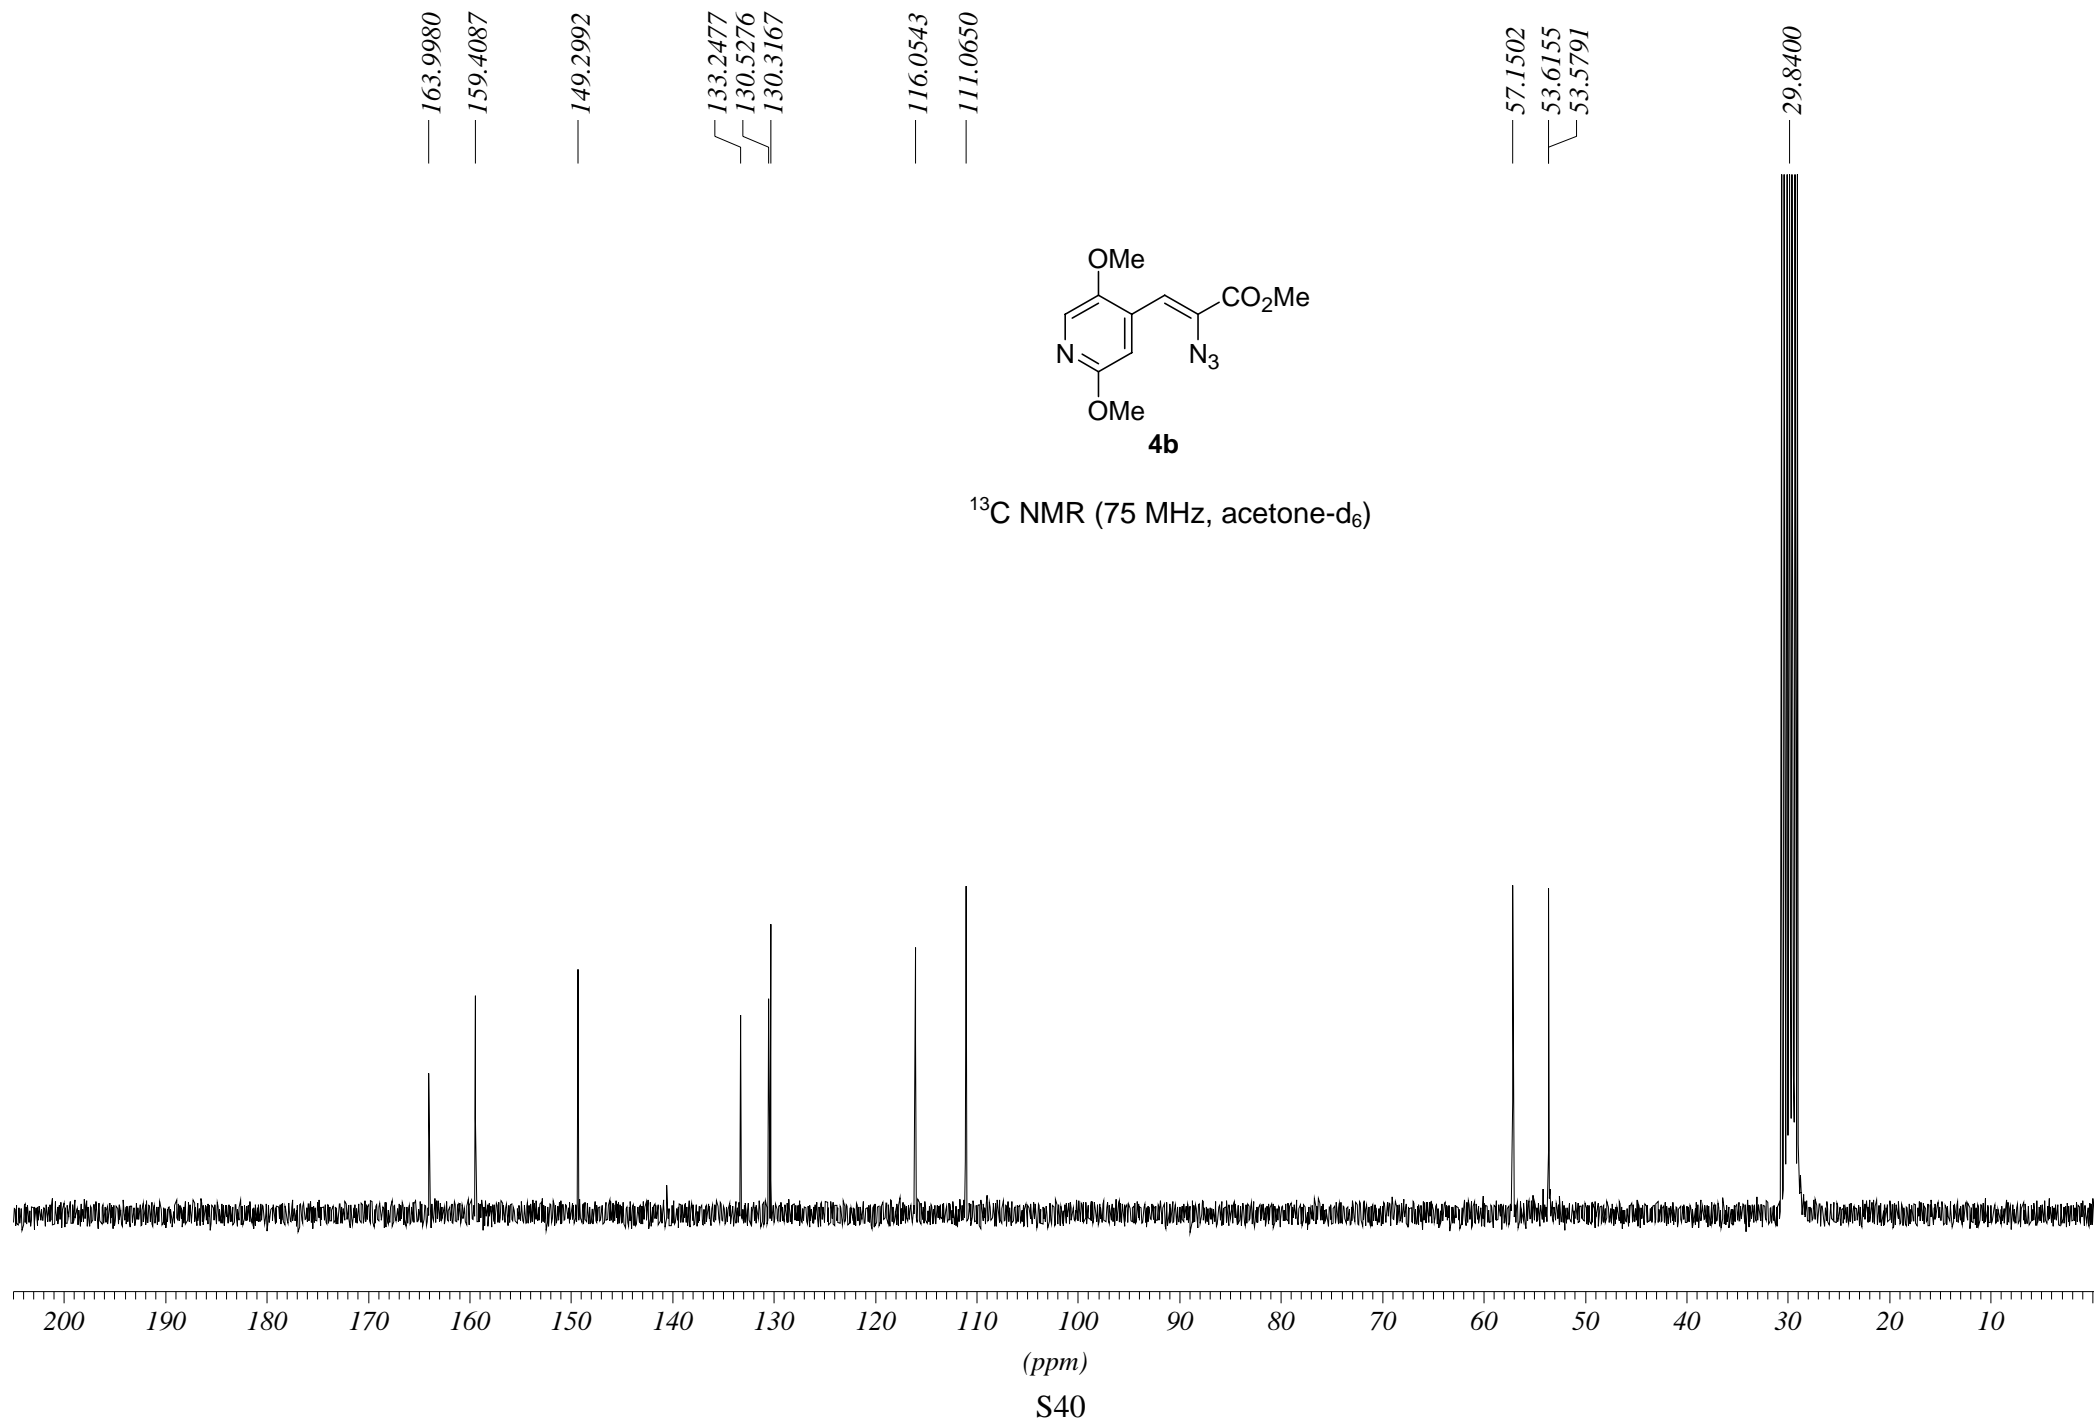



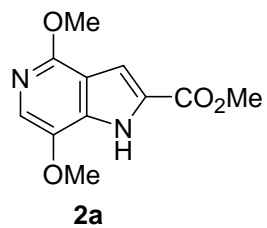

<sup>1</sup>H NMR (300 MHz, DMSO-d<sub>6</sub>)

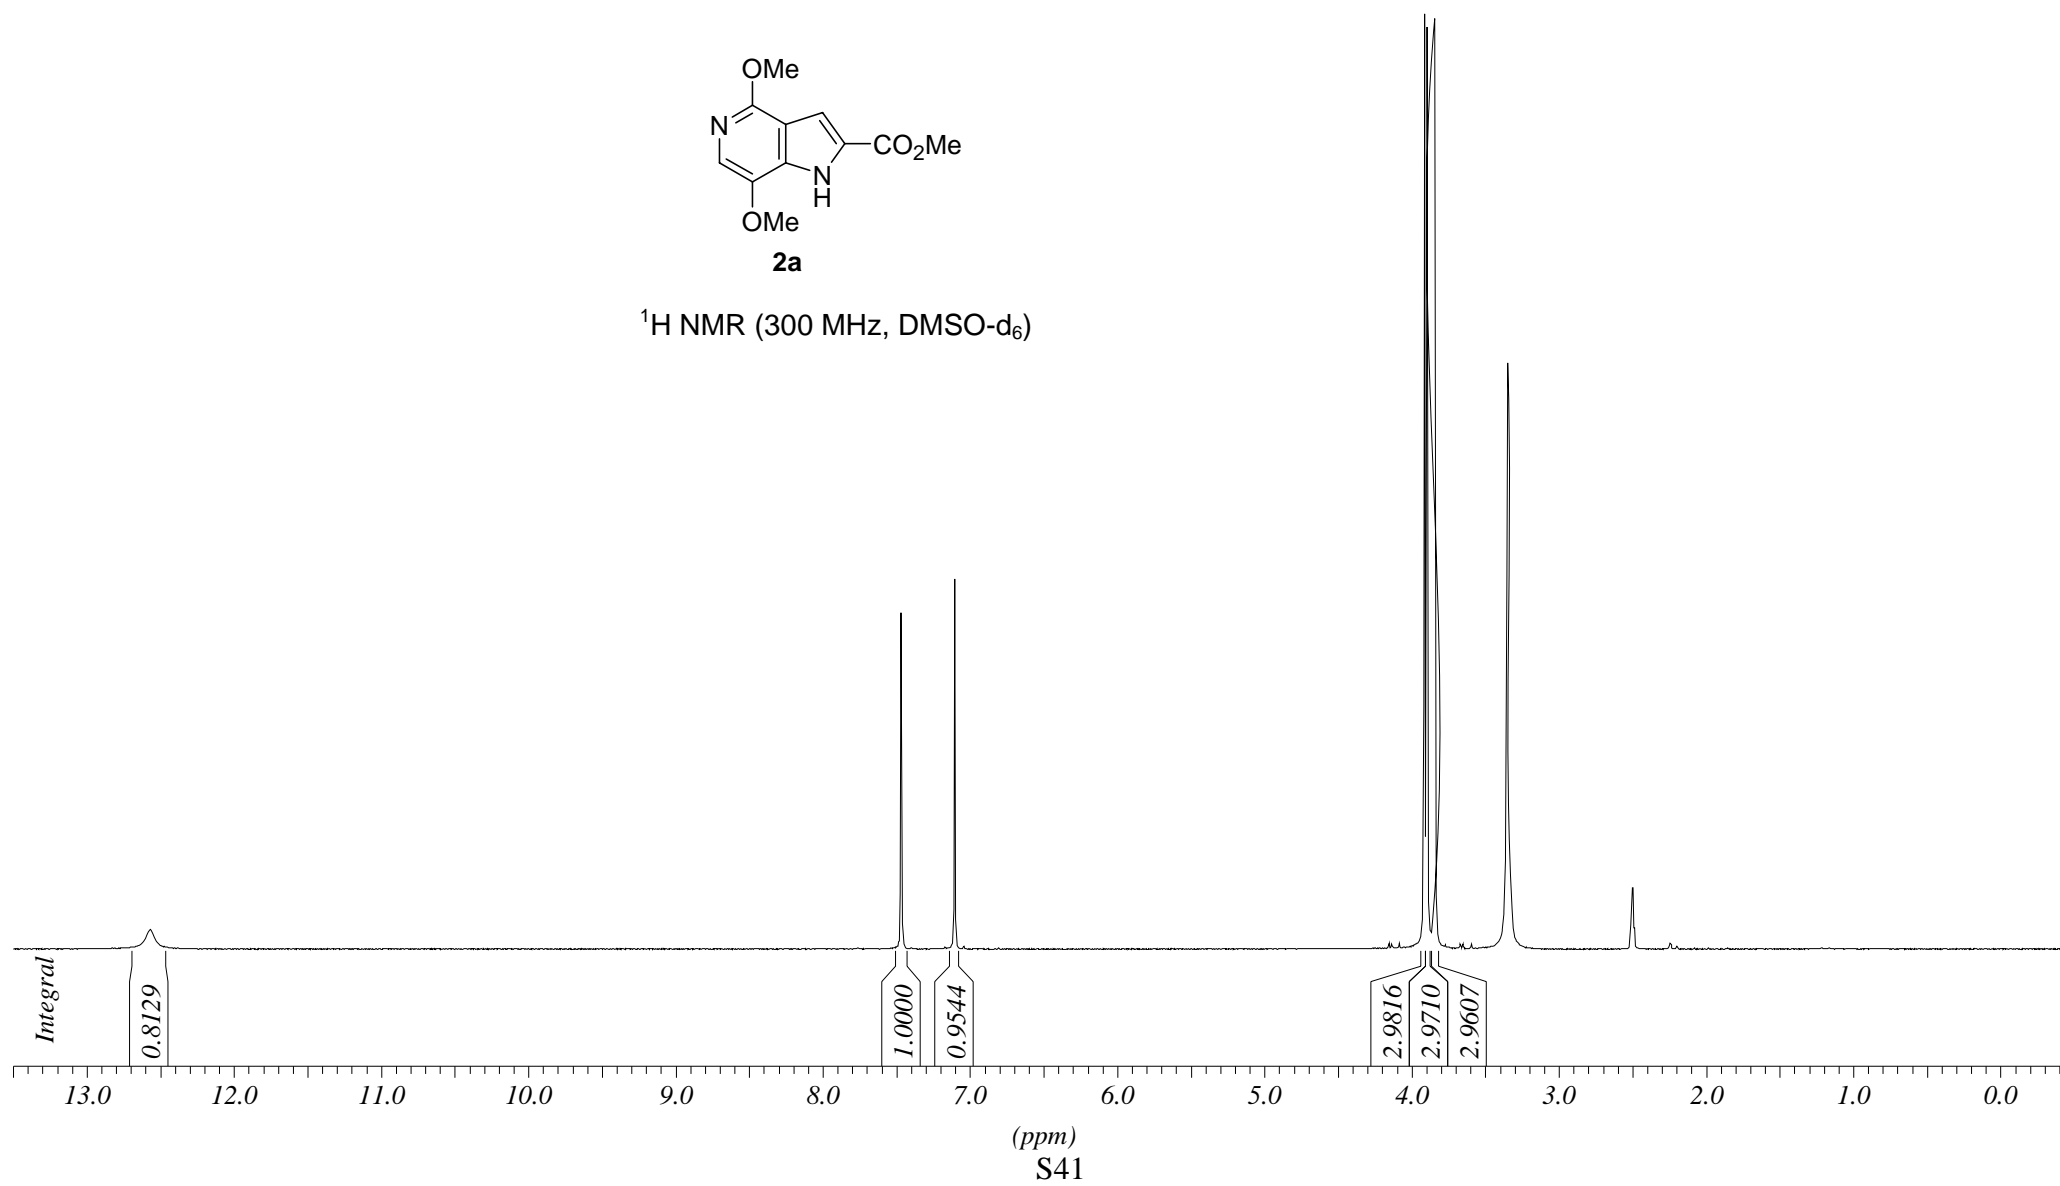

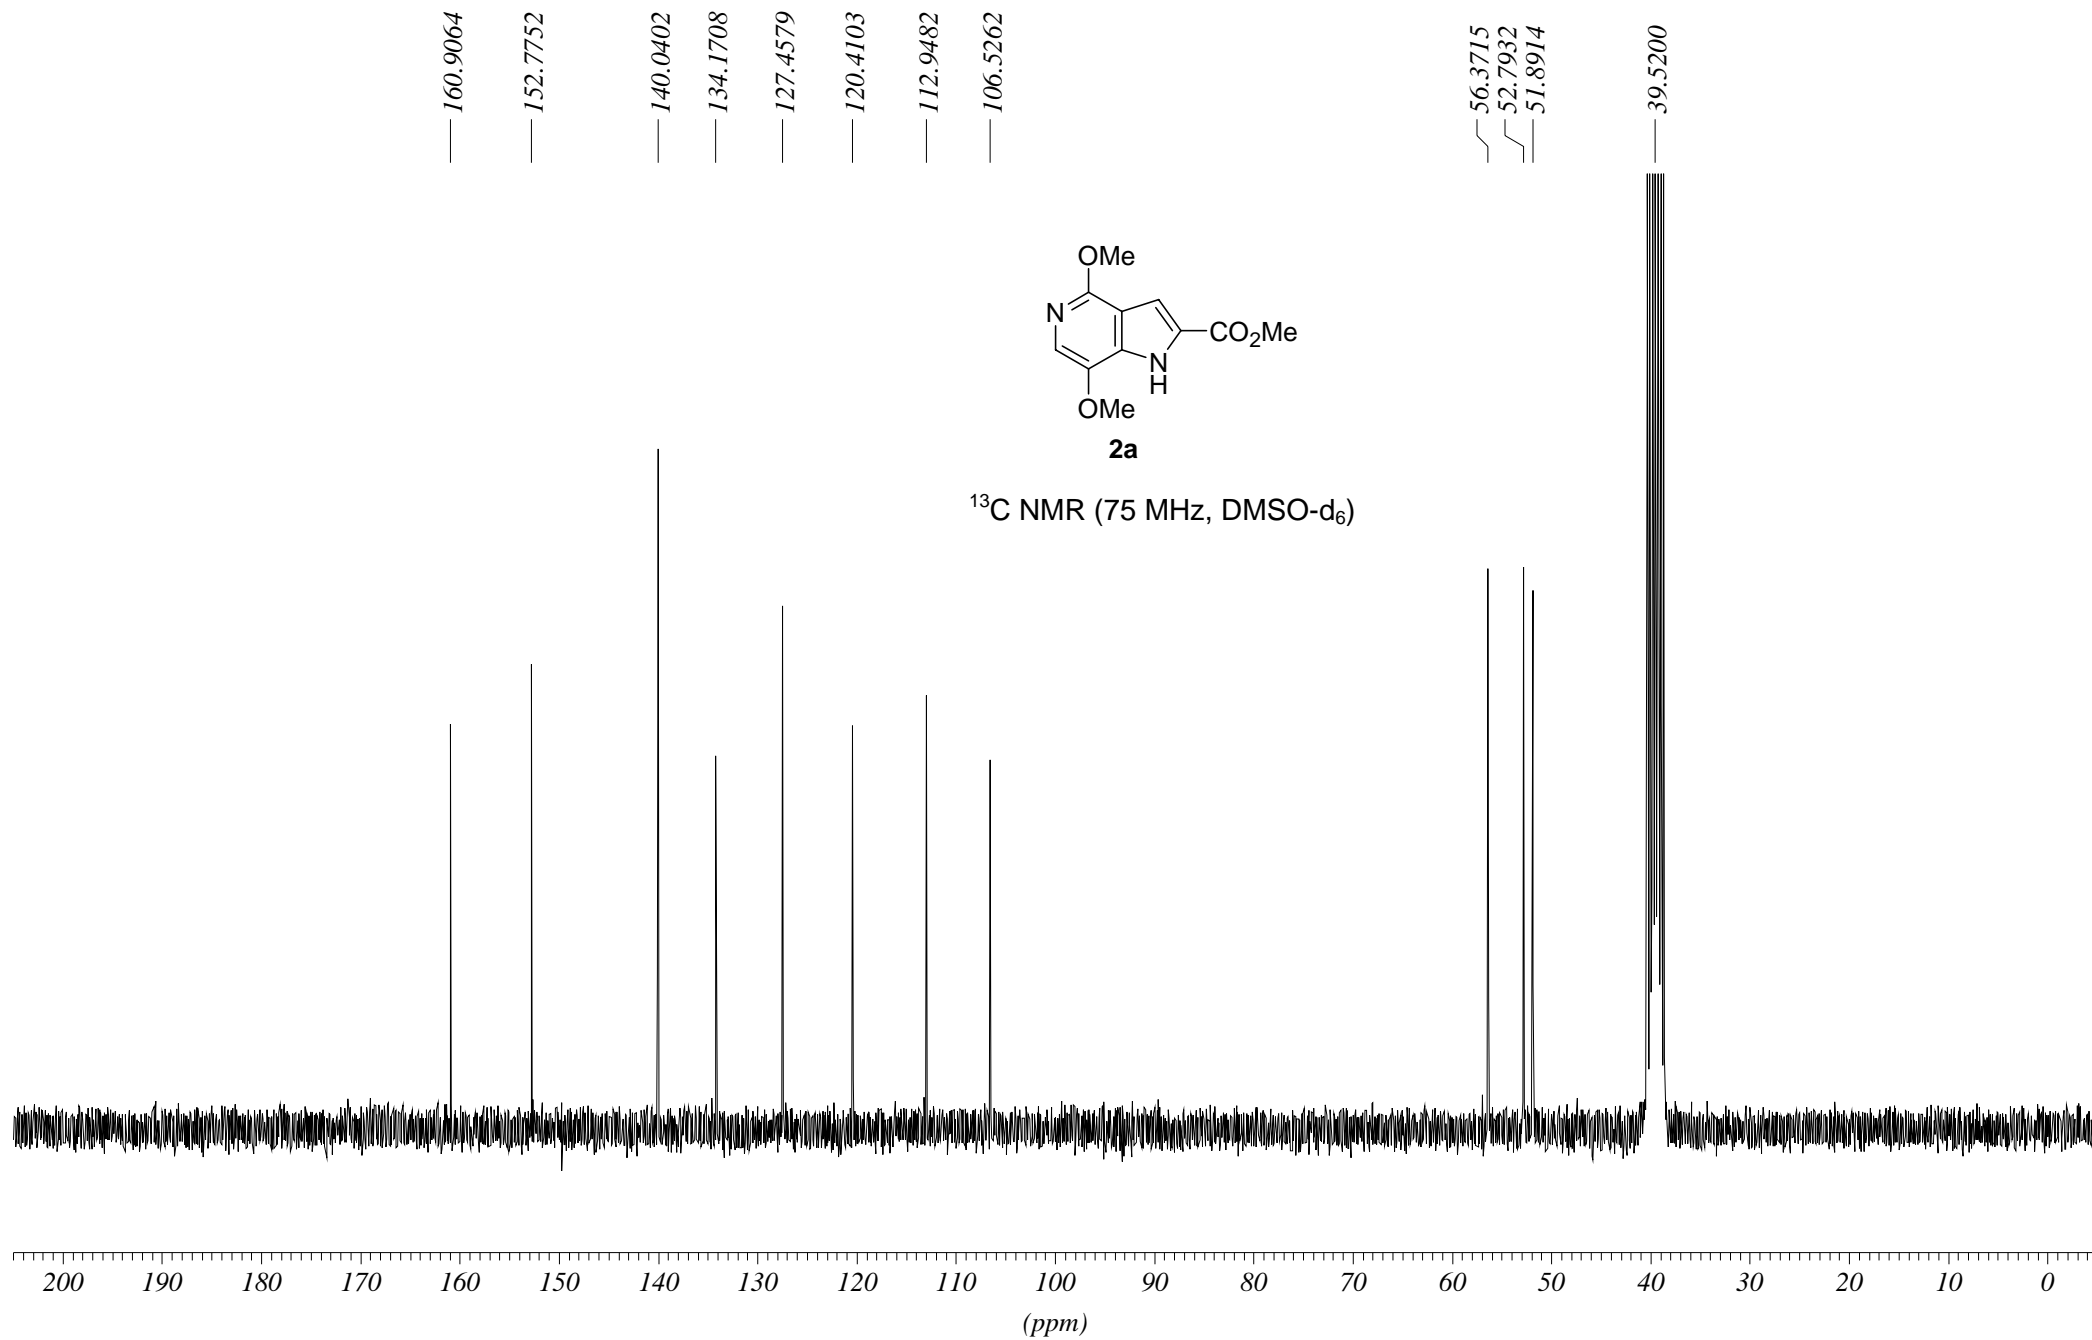

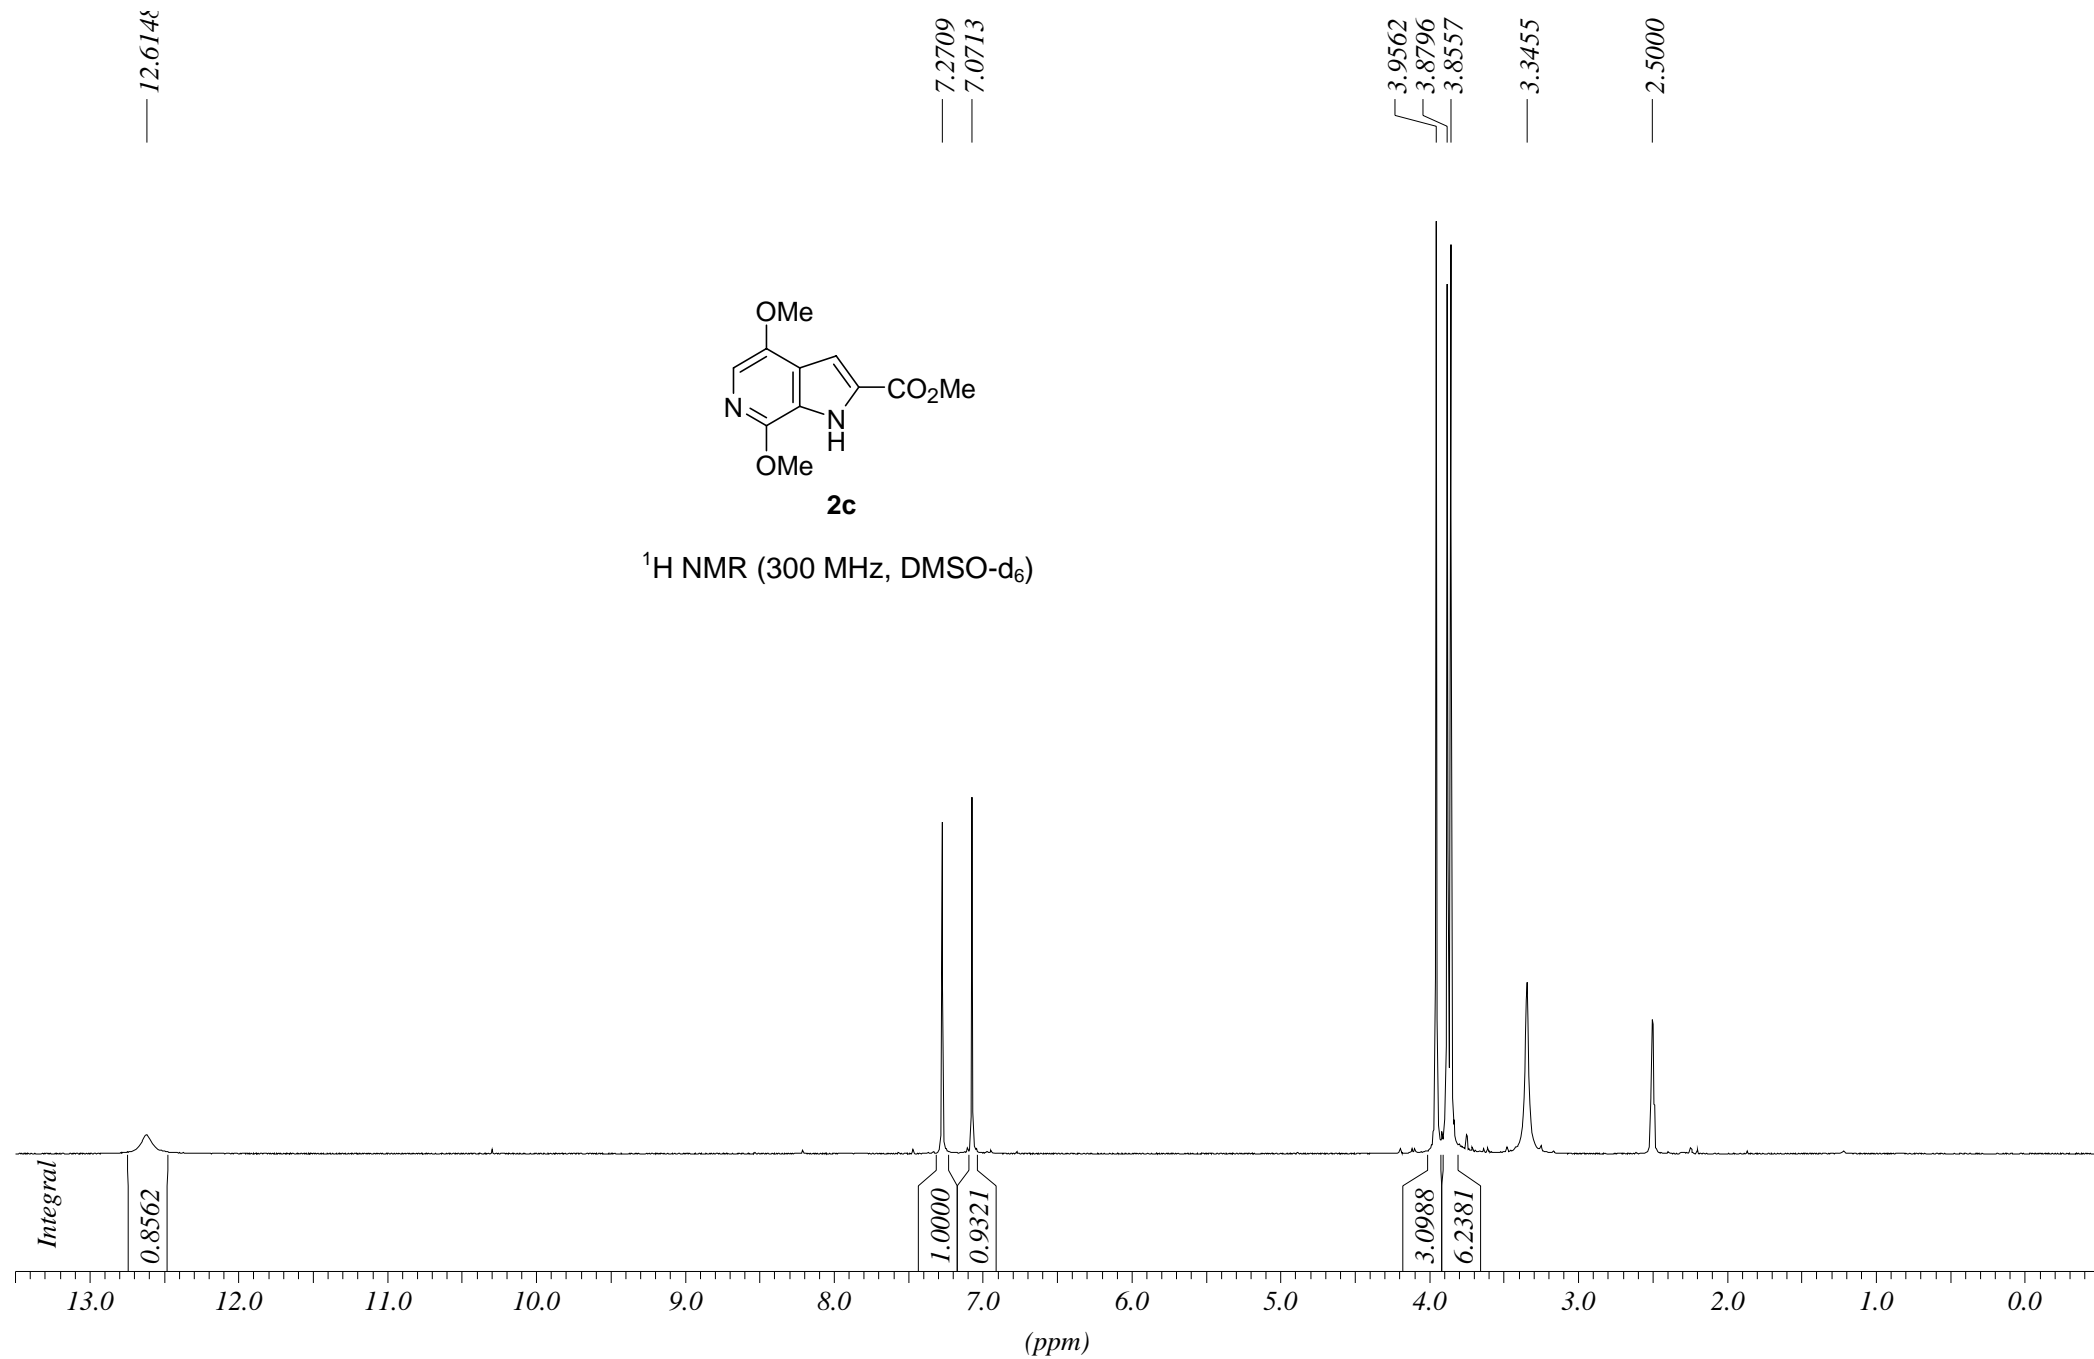

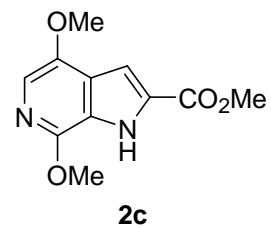

$^{13}\text{C}$  NMR (75 MHz, DMSO- $\text{d}_6$ )

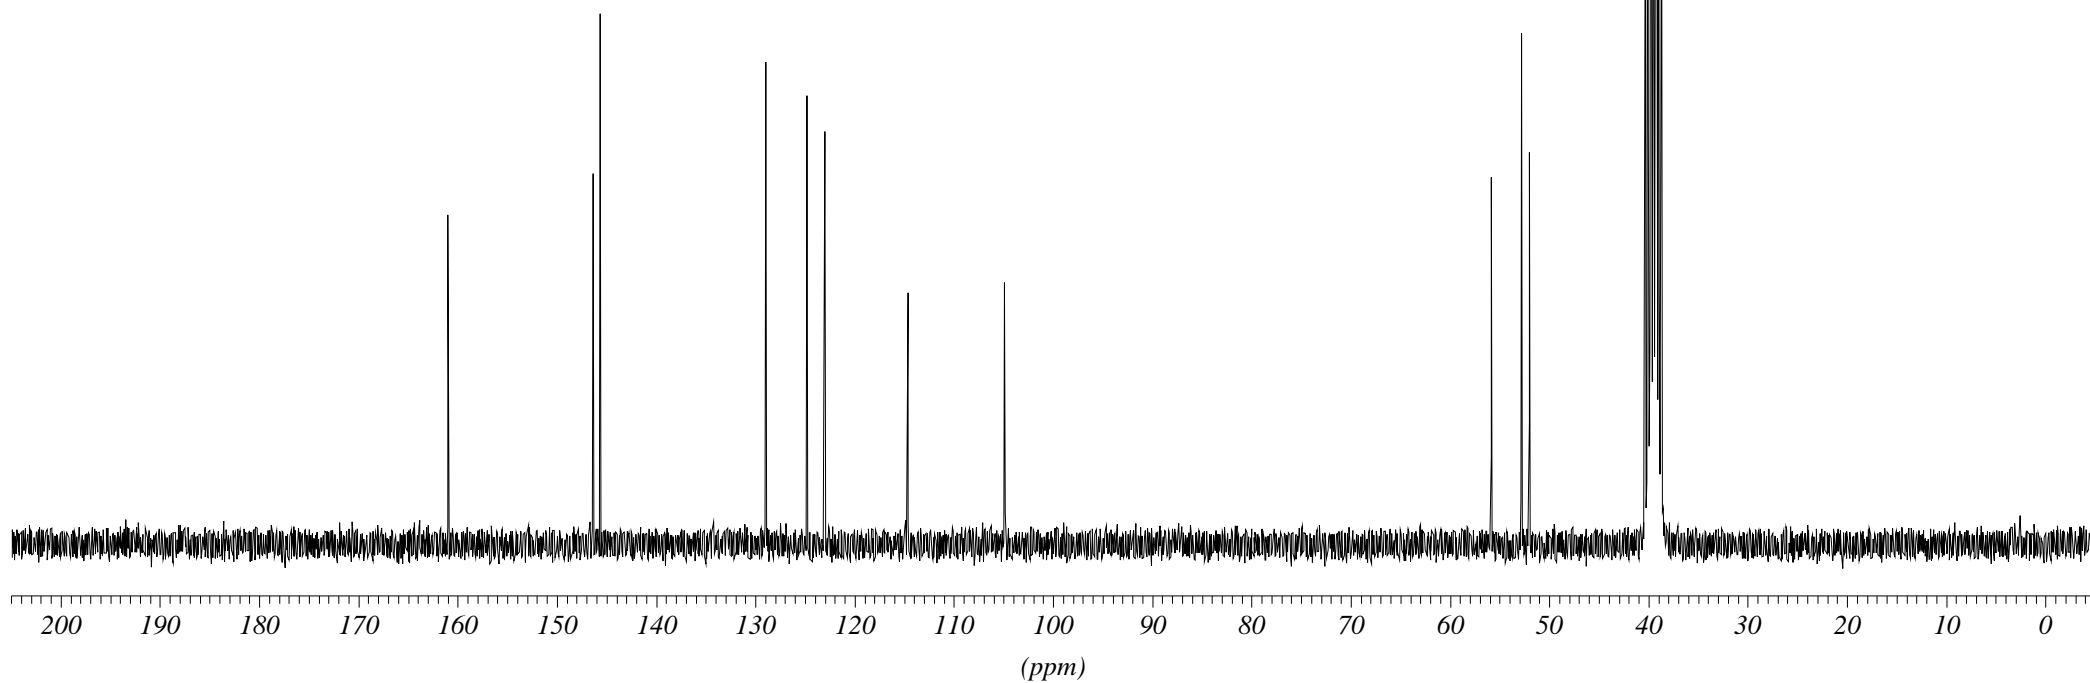

S44

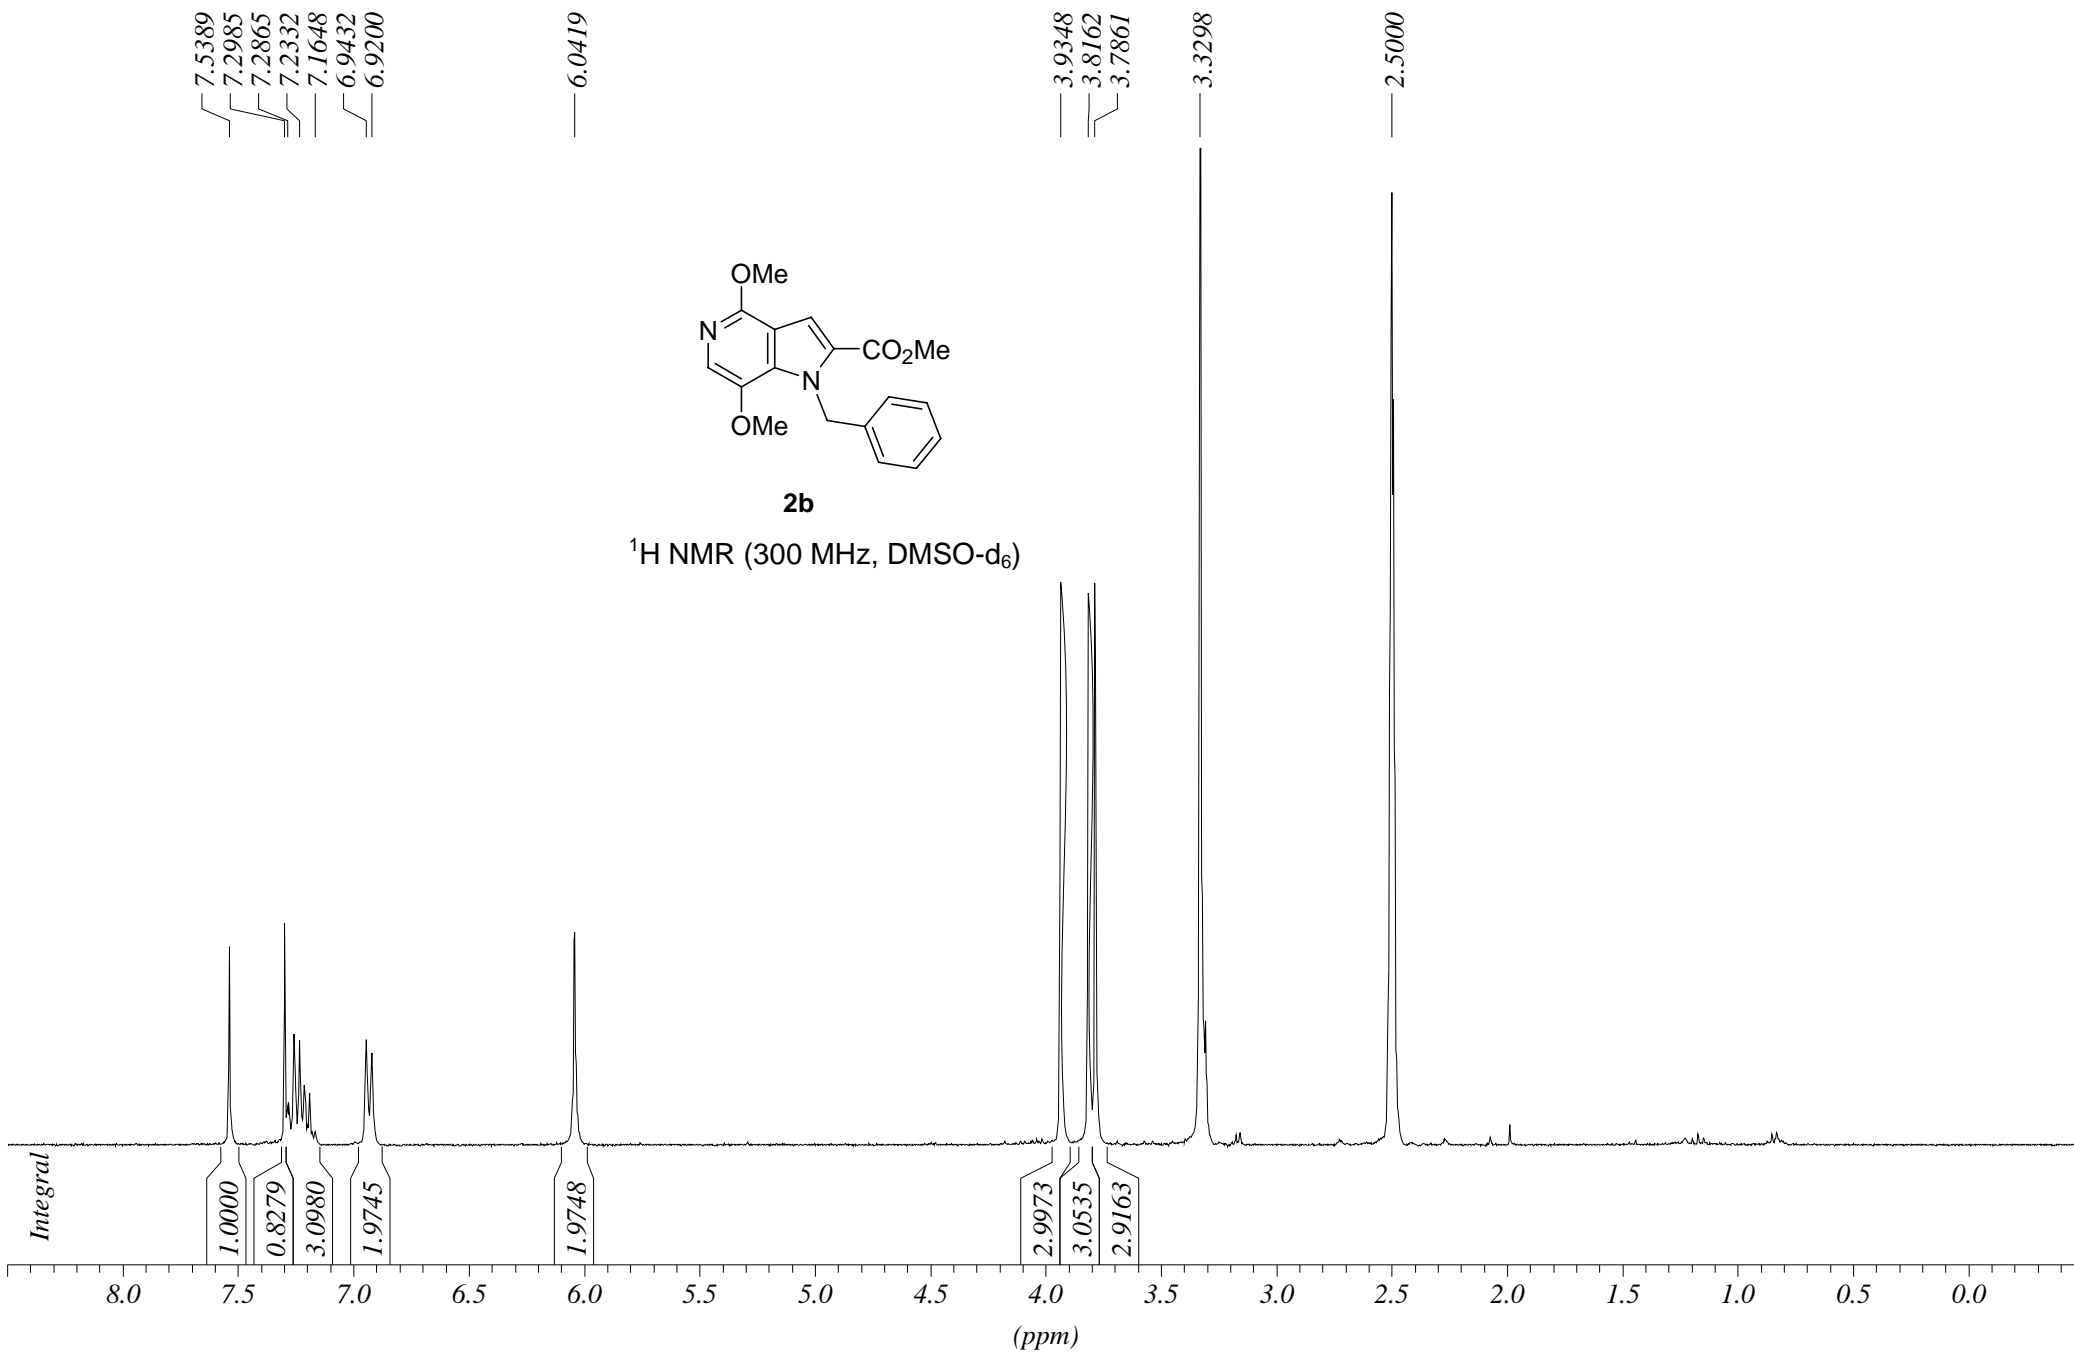

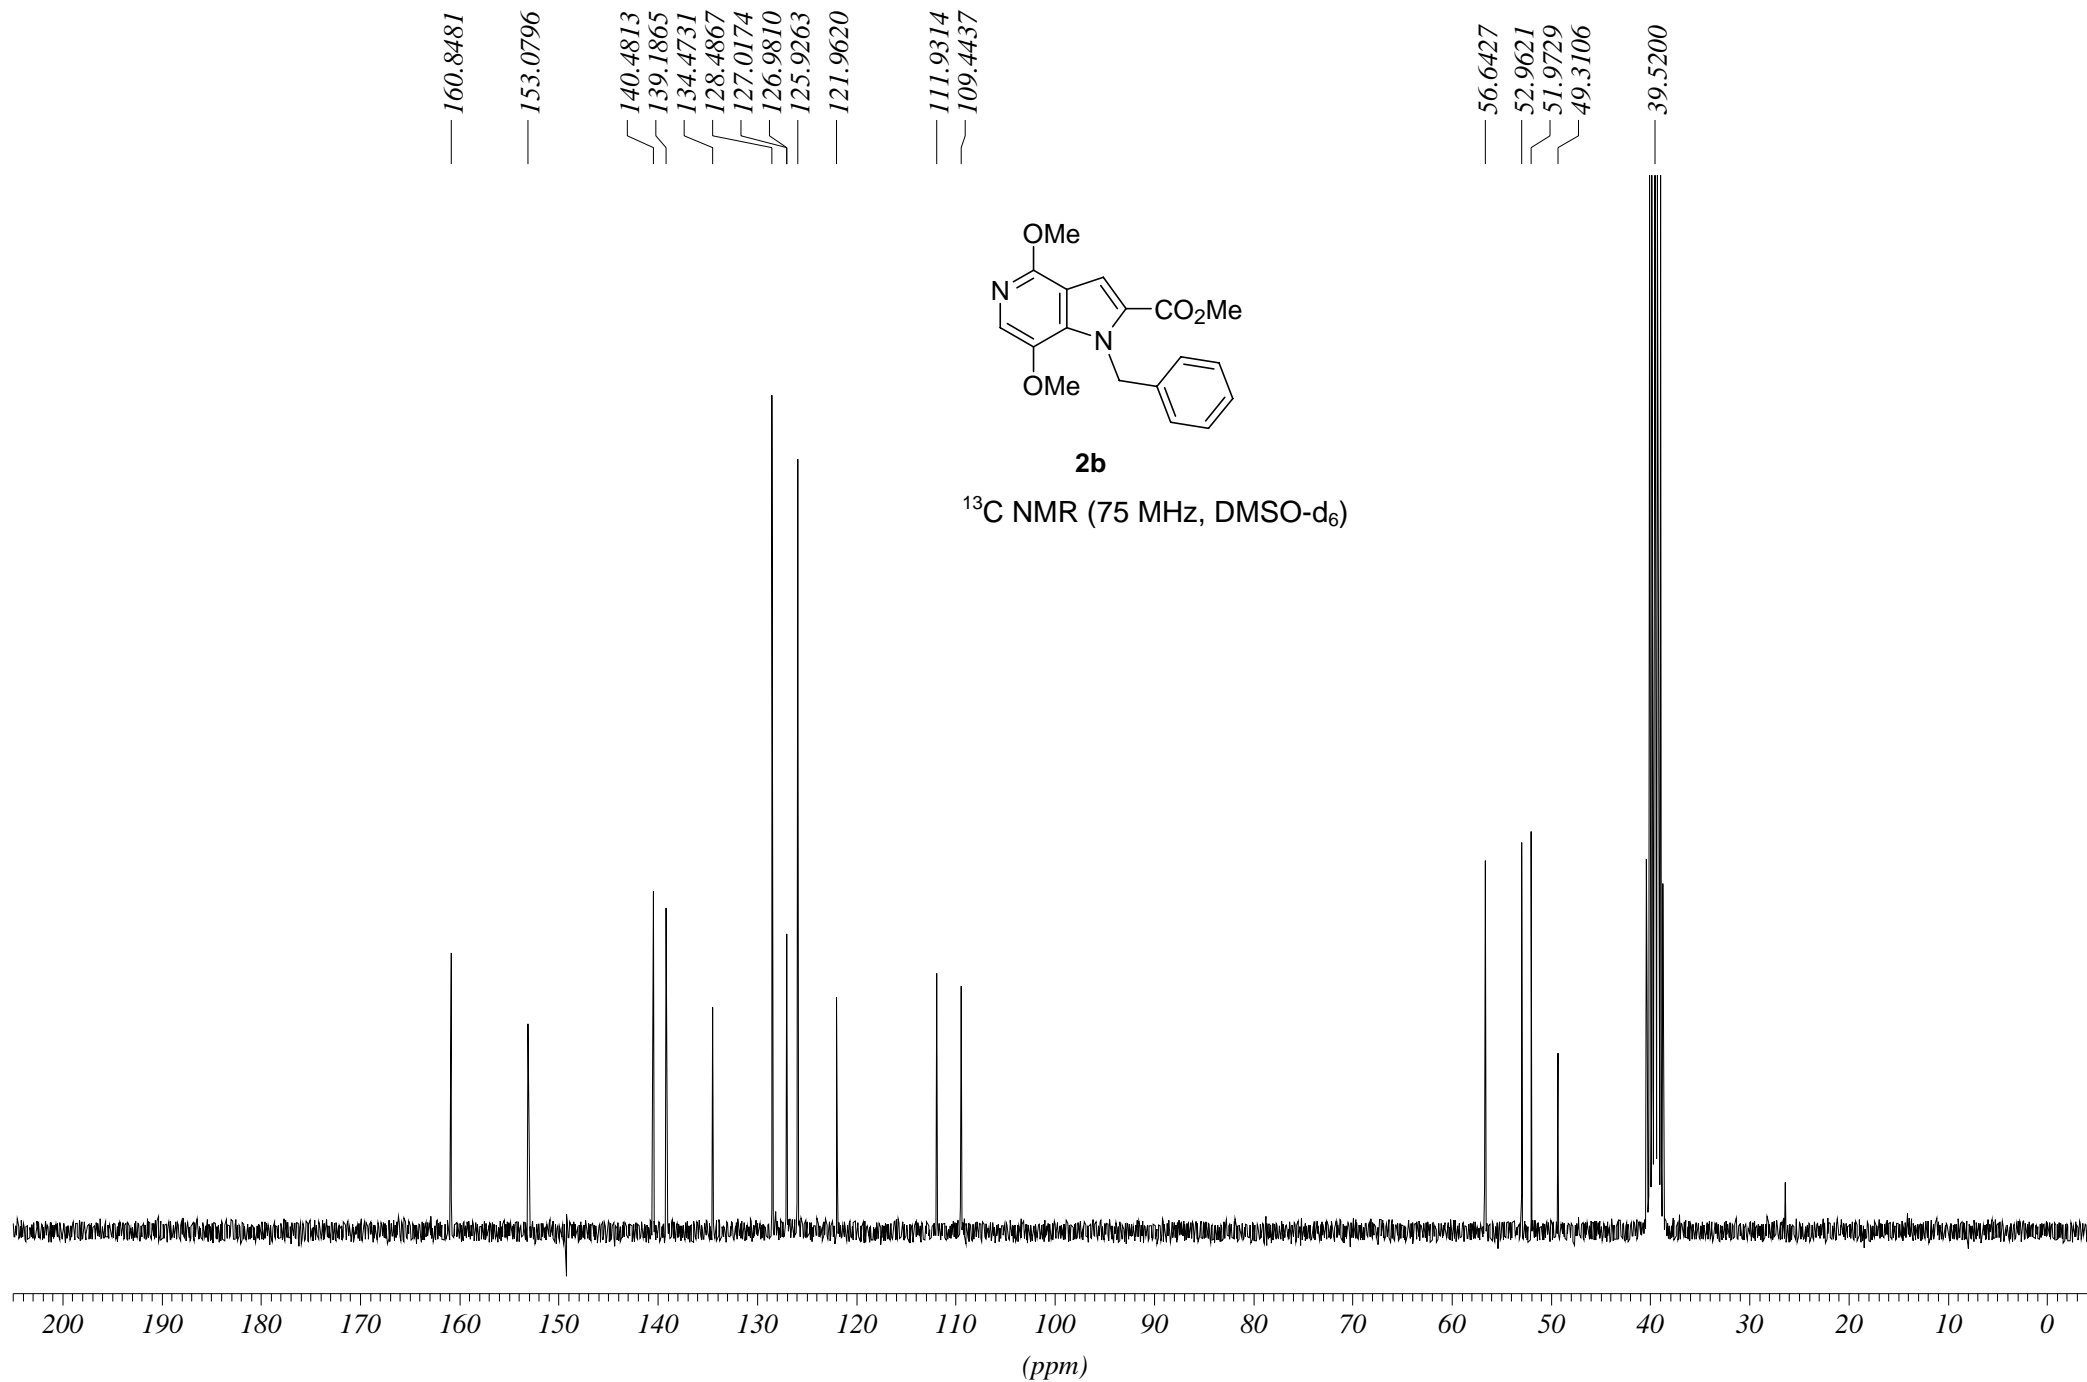

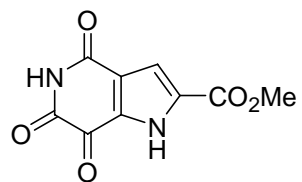

**12a**

<sup>1</sup>H NMR (300 MHz, DMSO-d<sub>6</sub>)

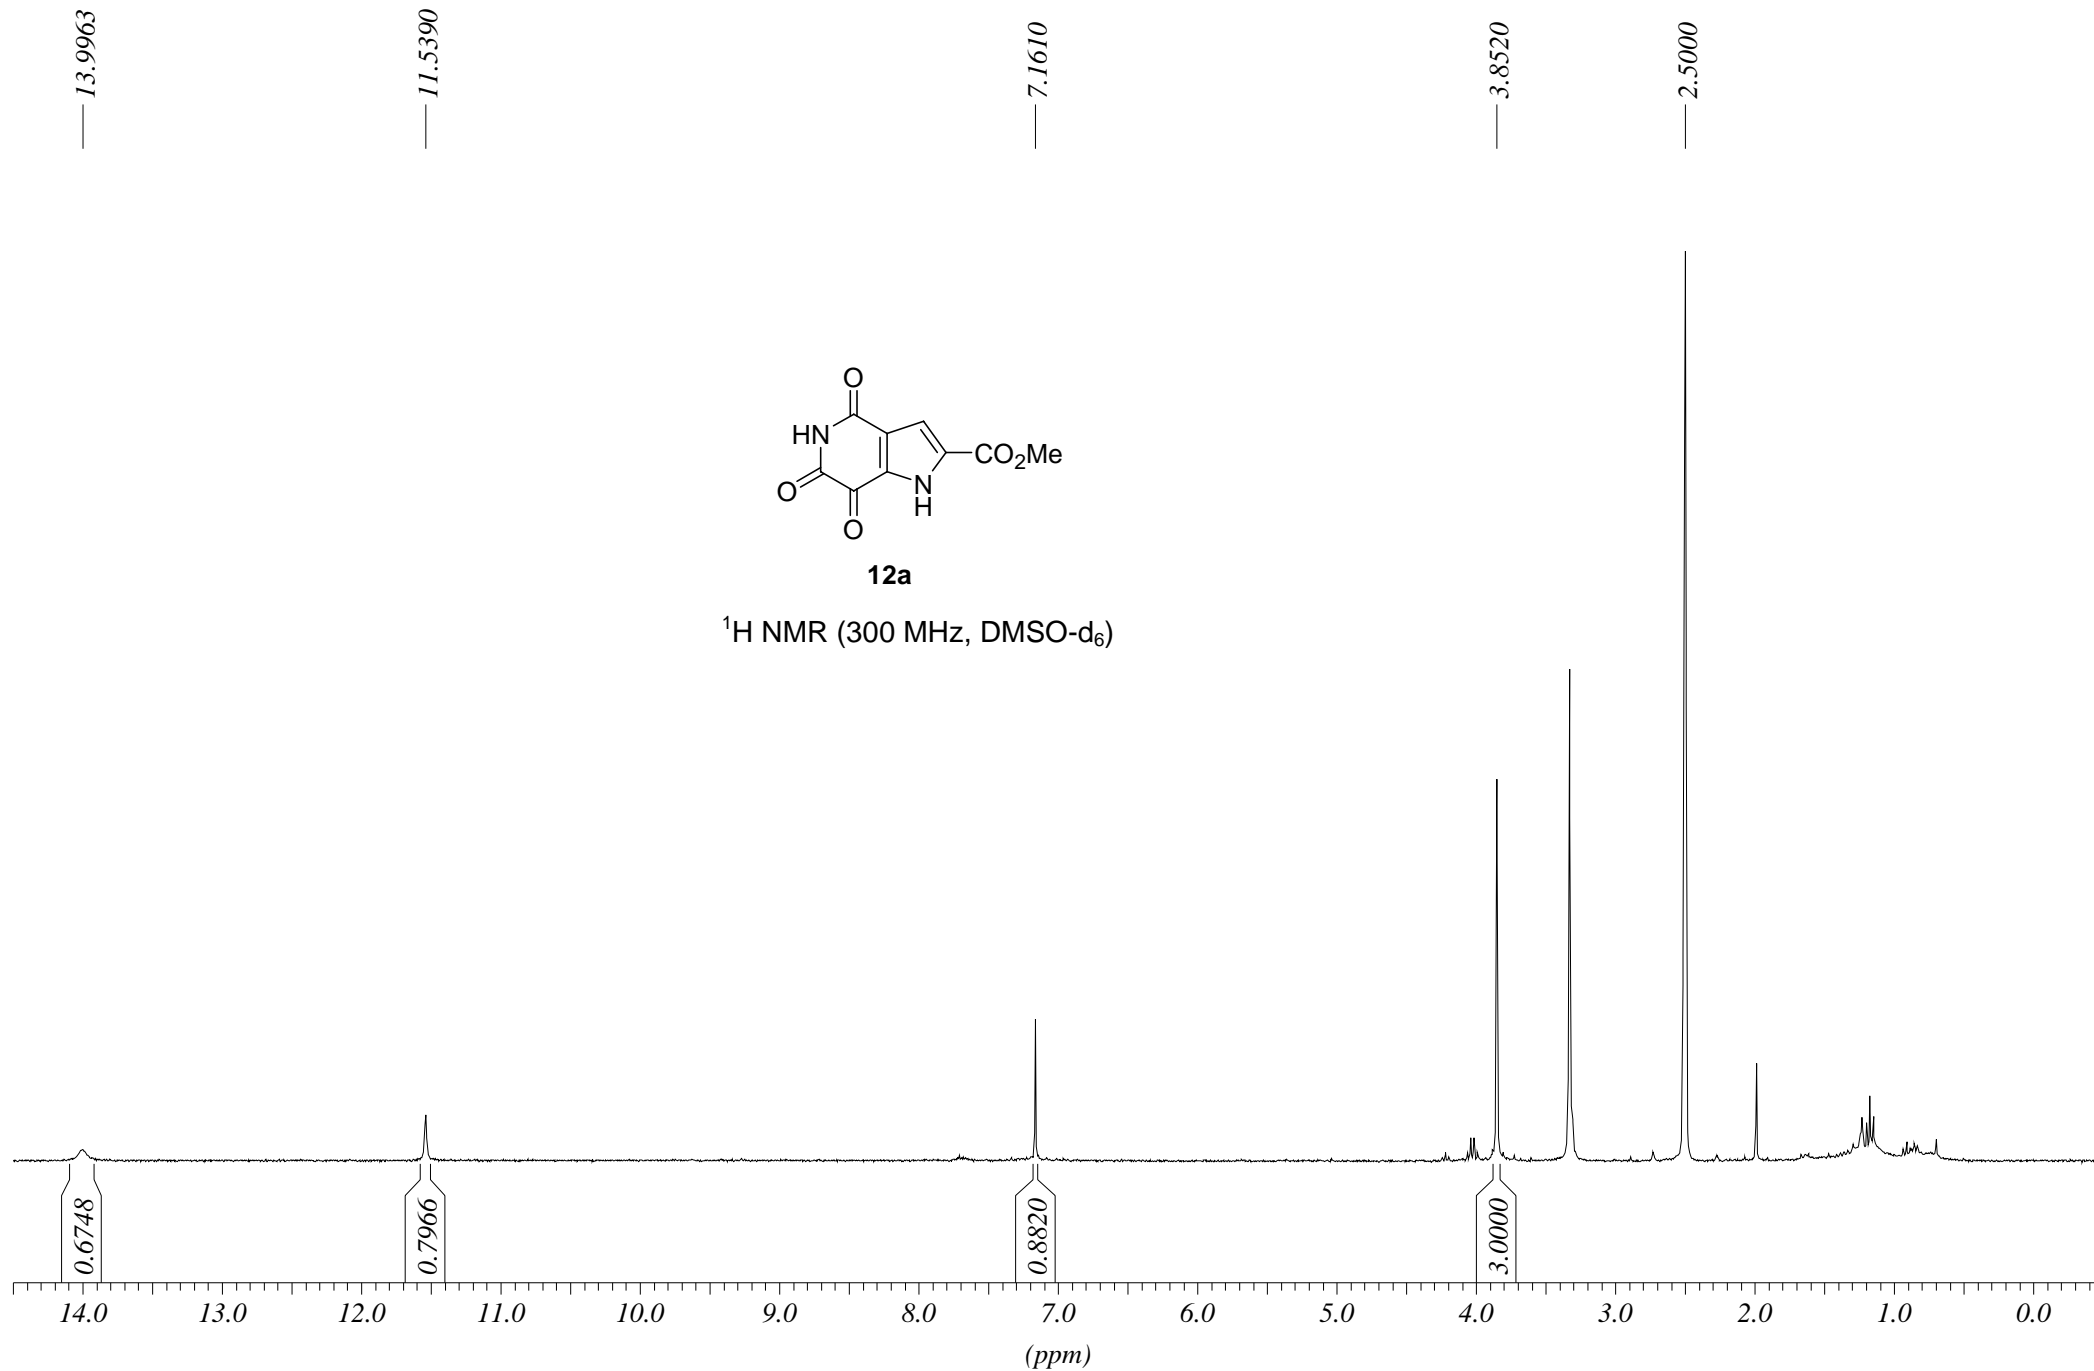

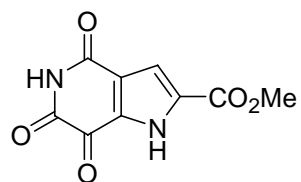

**12a**

<sup>13</sup>C NMR (75 MHz, DMSO-d<sub>6</sub>)

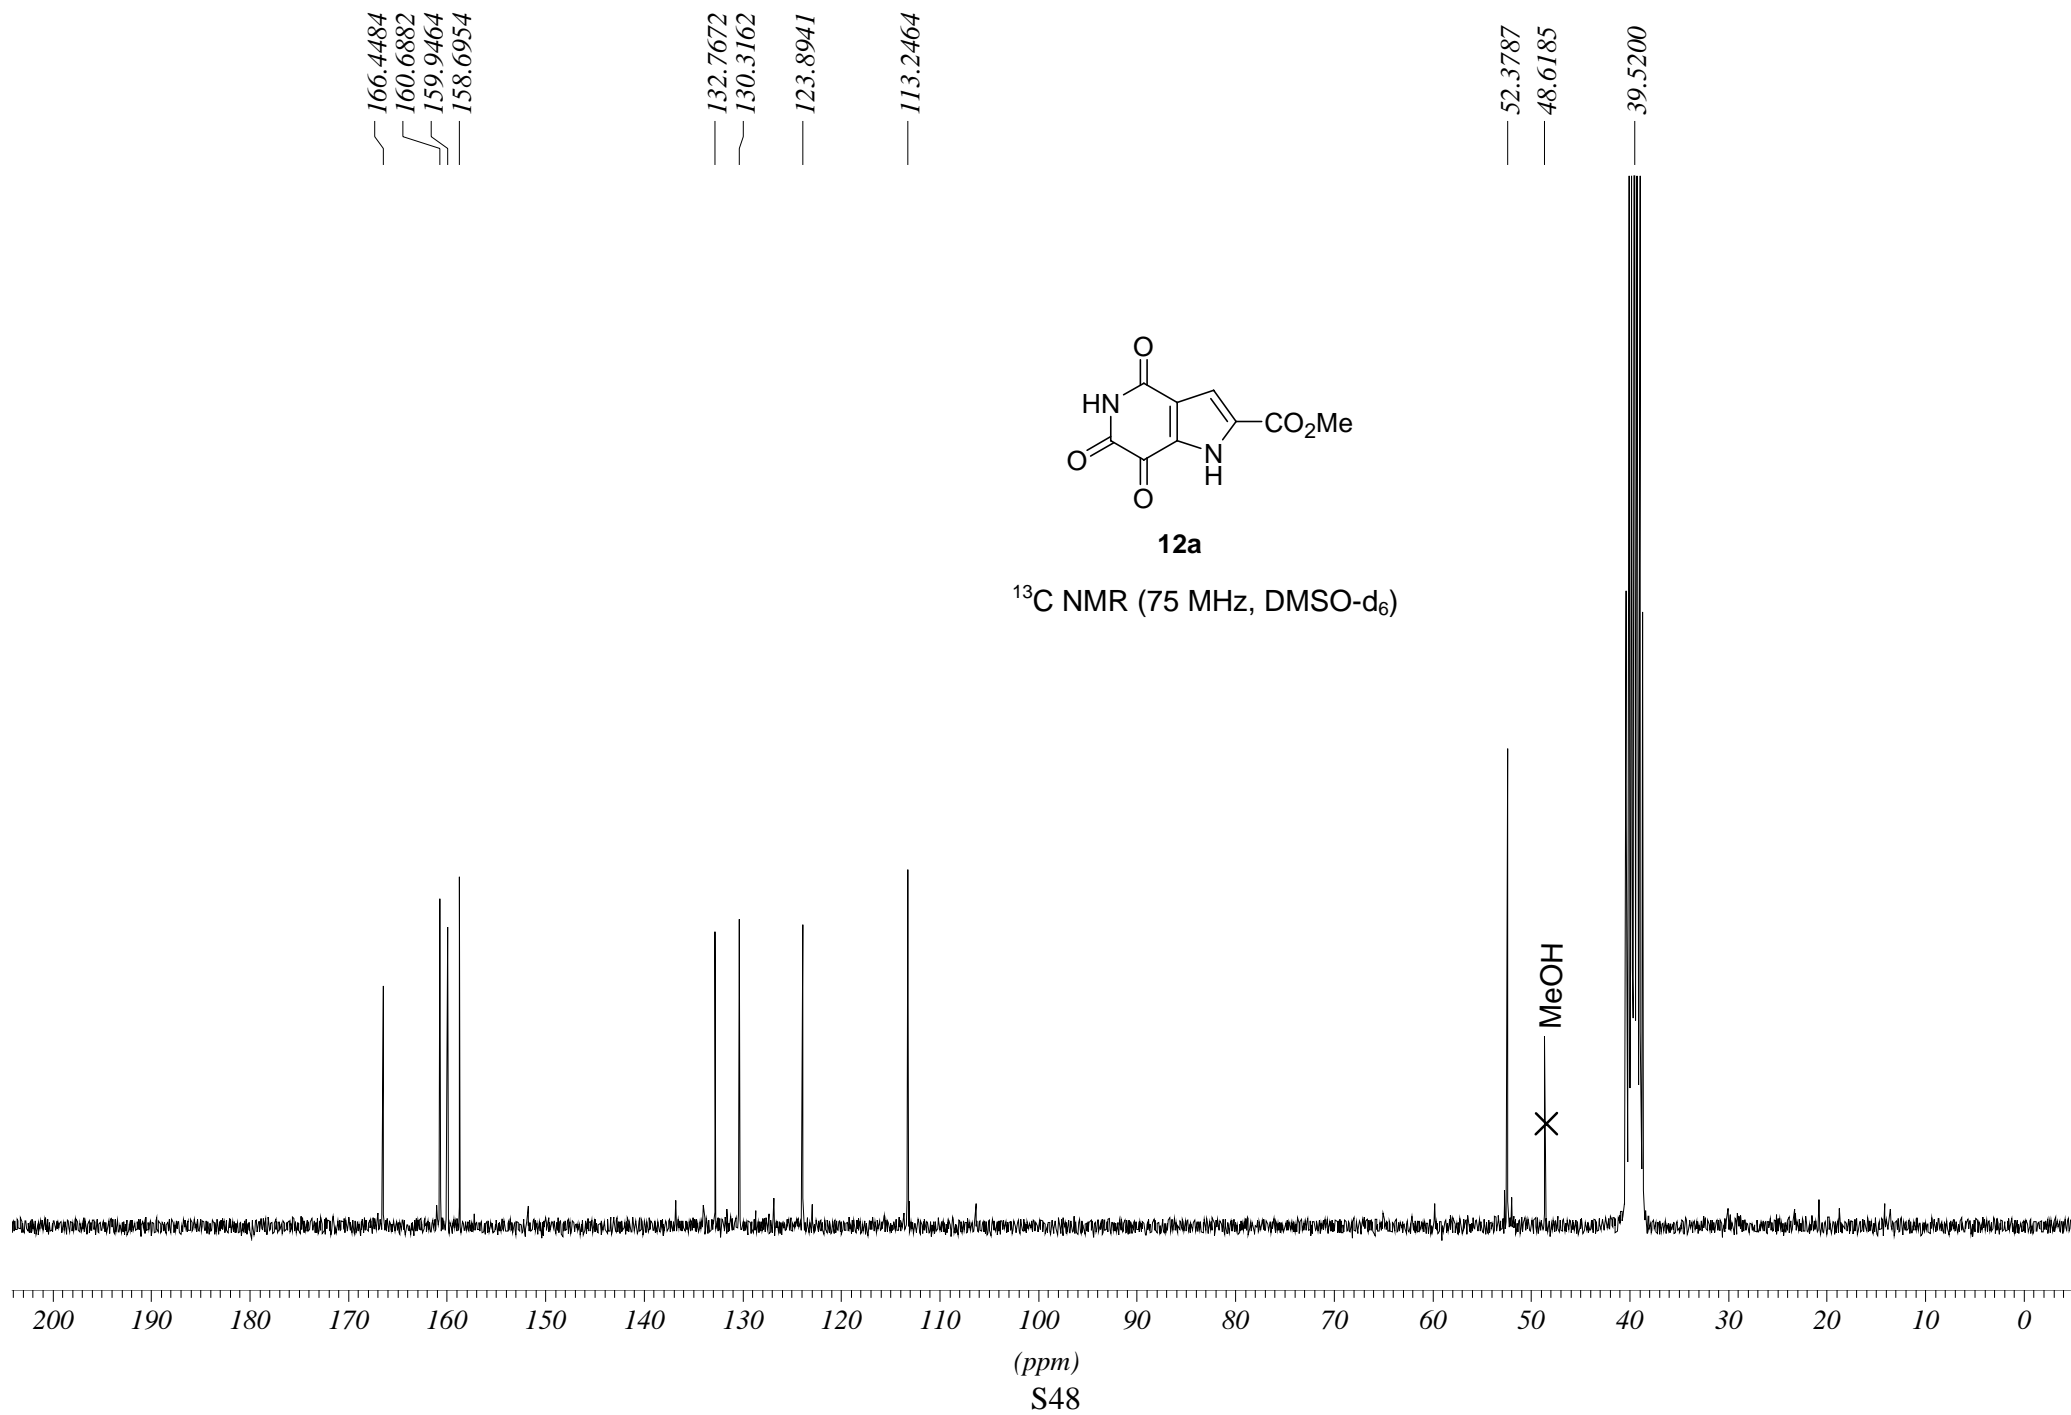



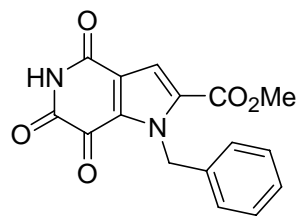

**12b**

$^1\text{H}$  NMR (300 MHz, DMSO- $\text{d}_6$ )

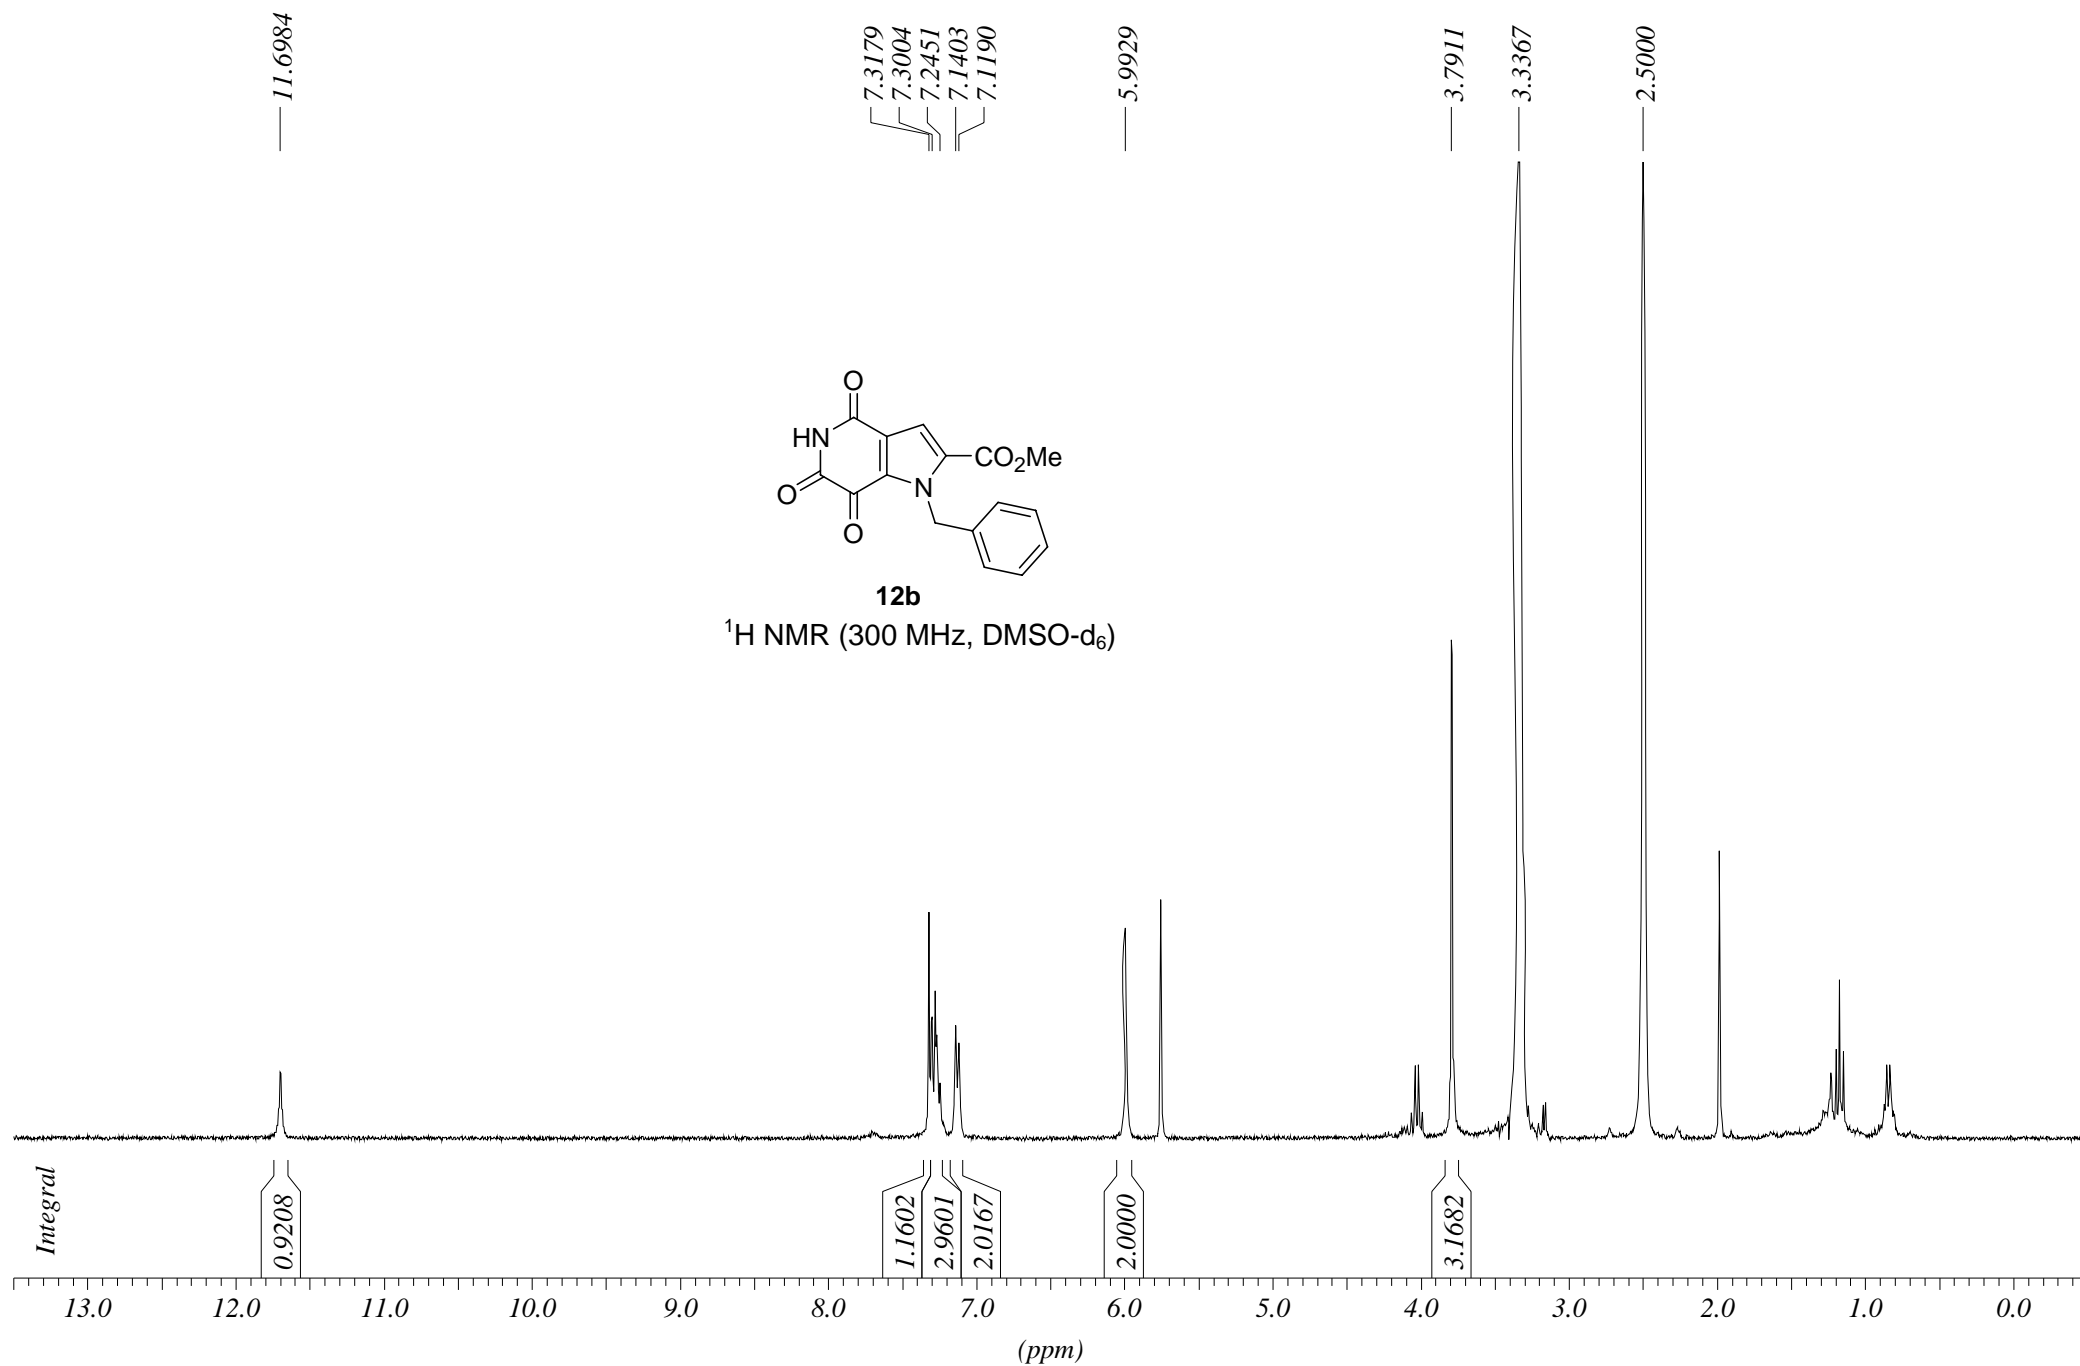

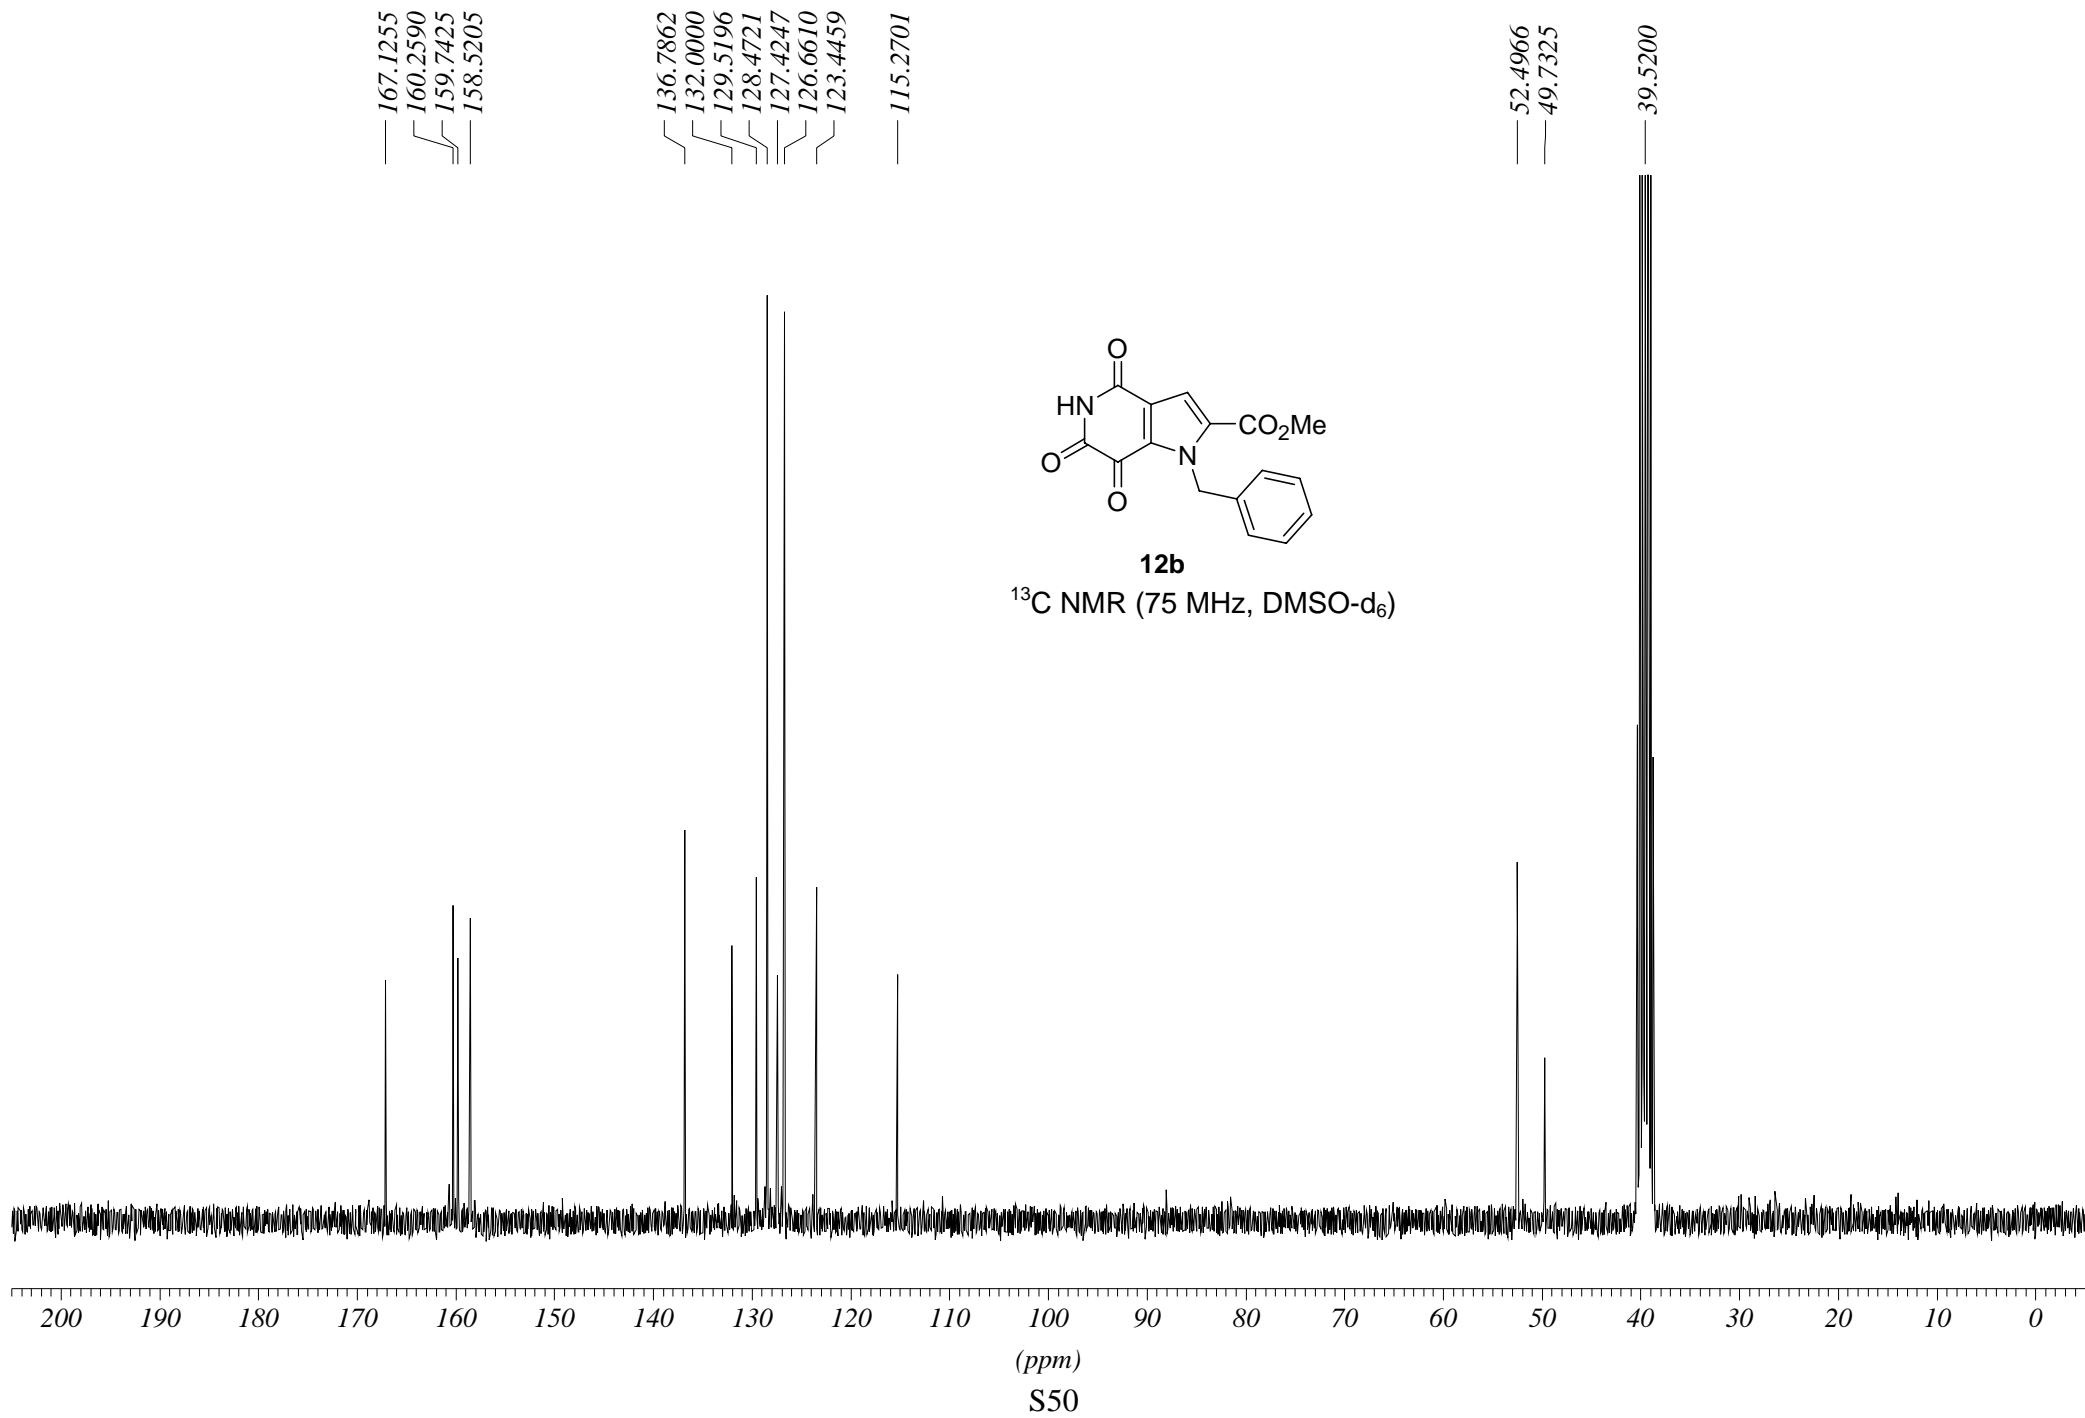

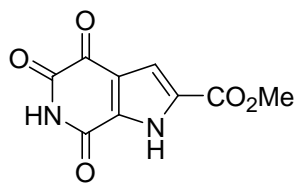

**12c**

<sup>1</sup>H NMR (300 MHz, DMSO-d<sub>6</sub>)

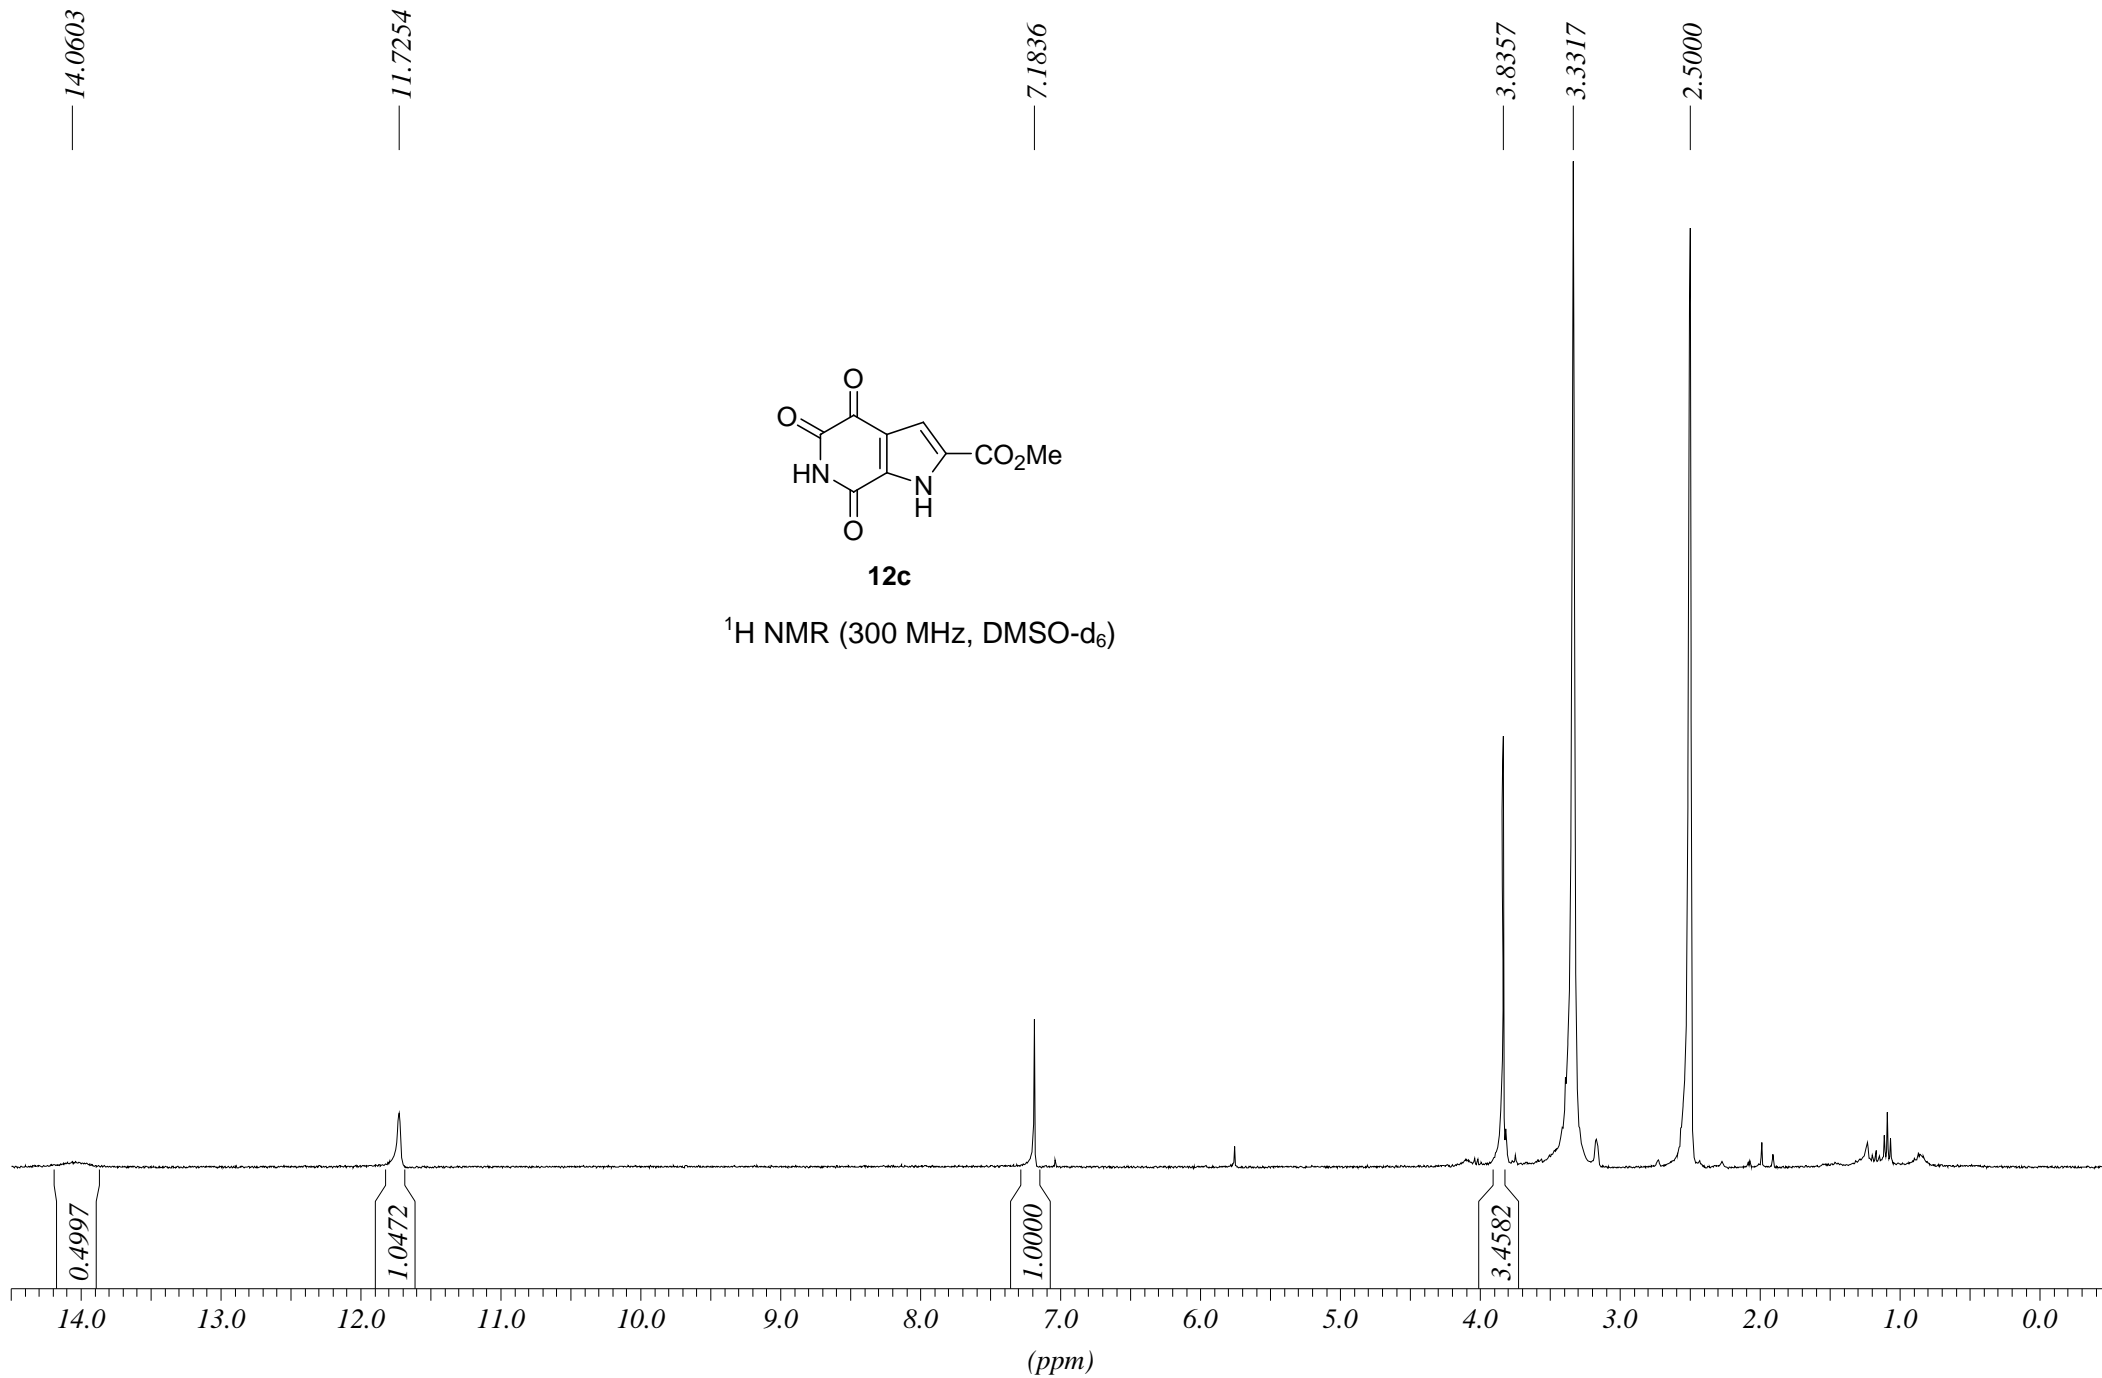

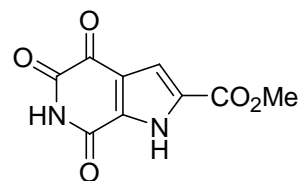

**12c**

<sup>13</sup>C NMR (75 MHz, DMSO-d<sub>6</sub>)

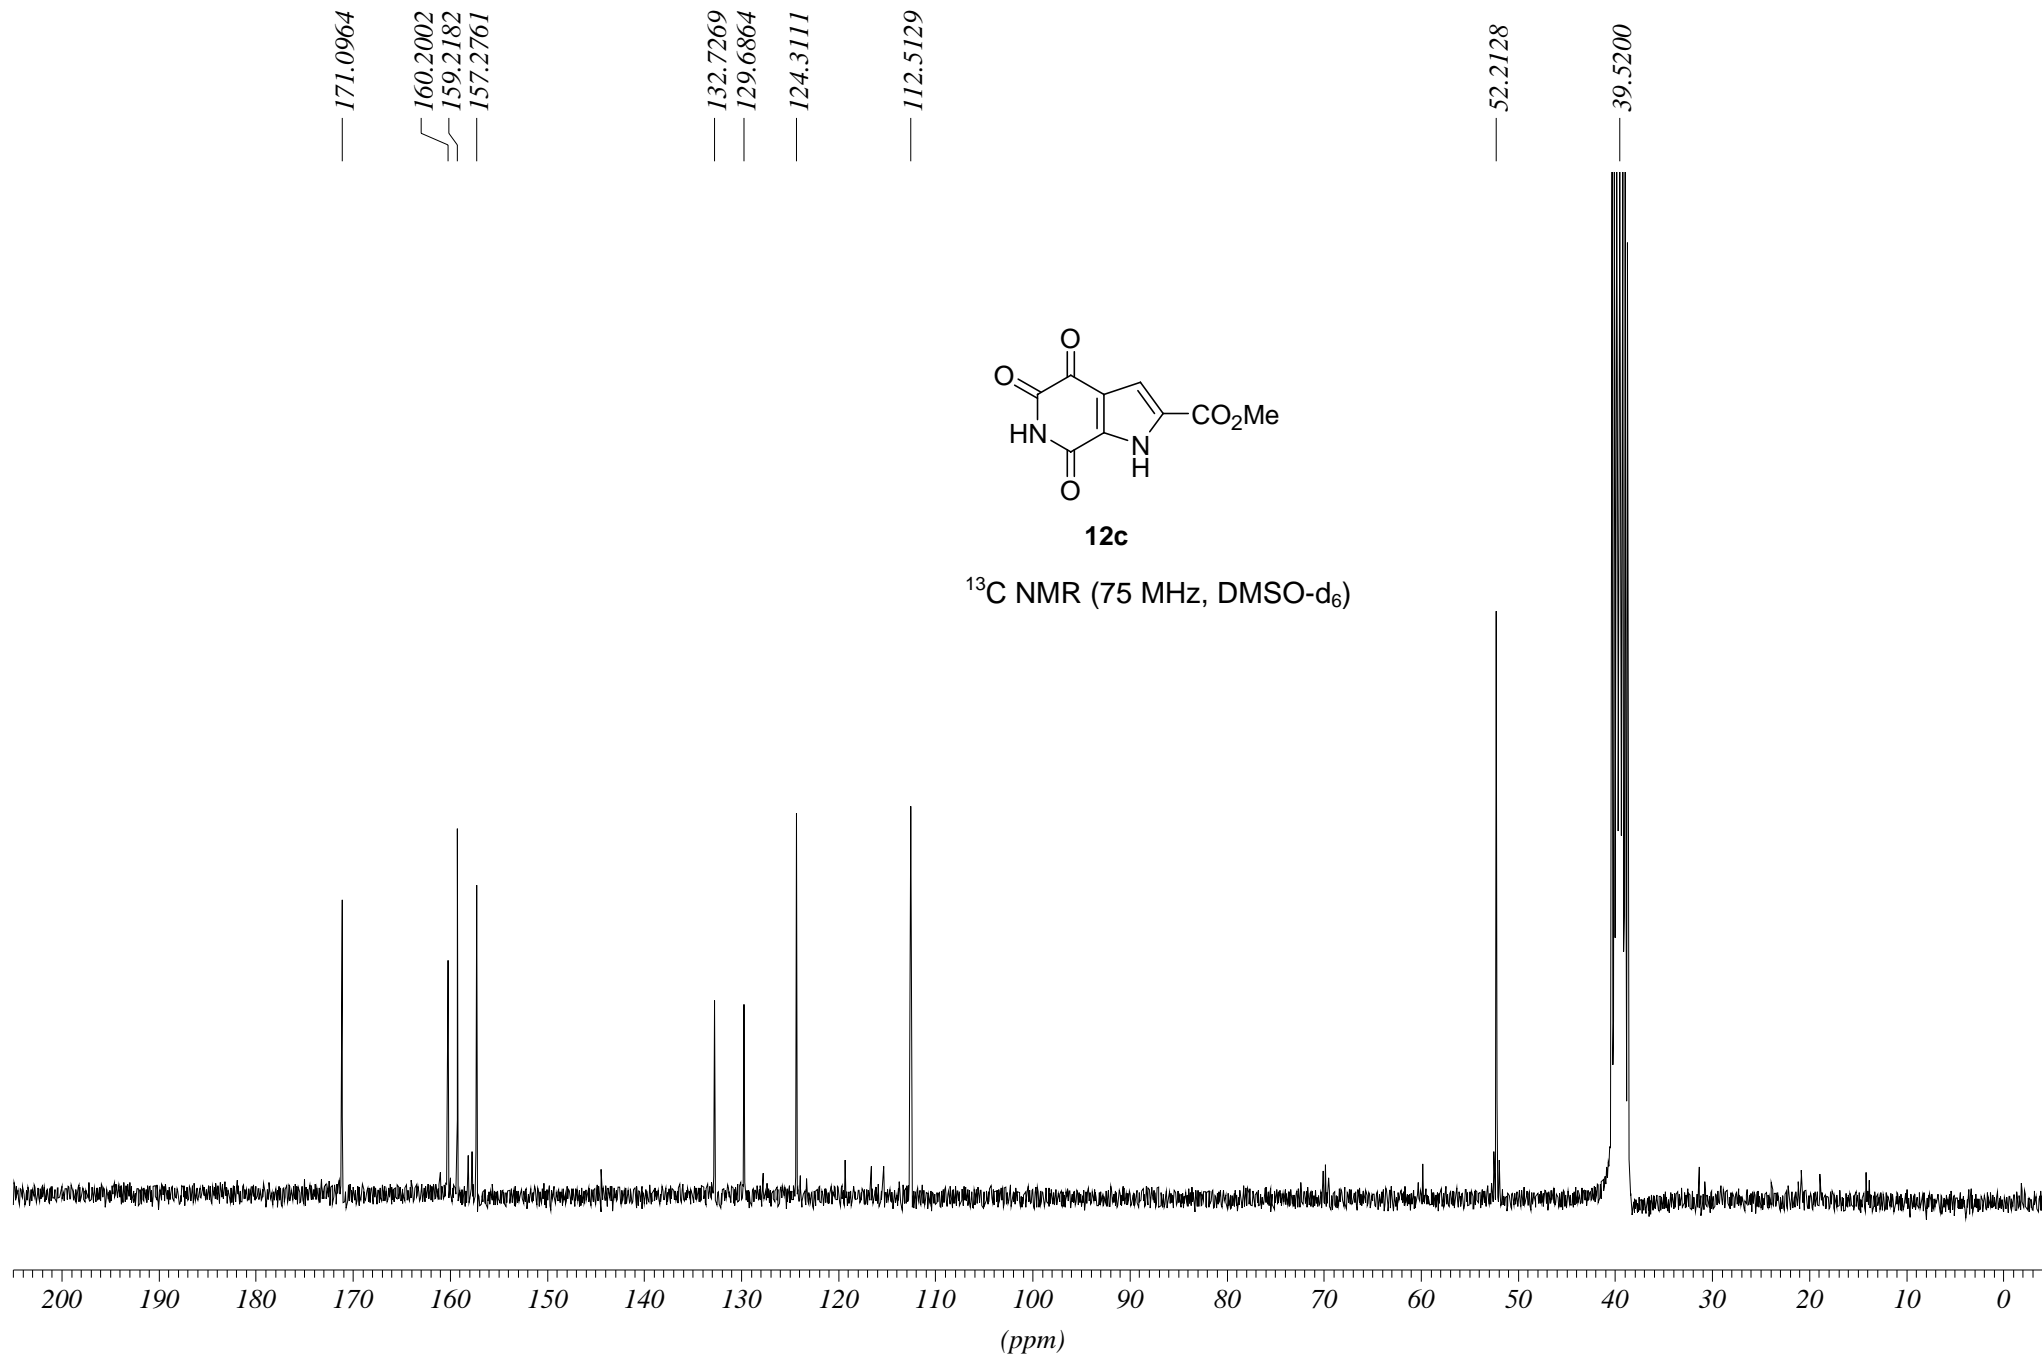

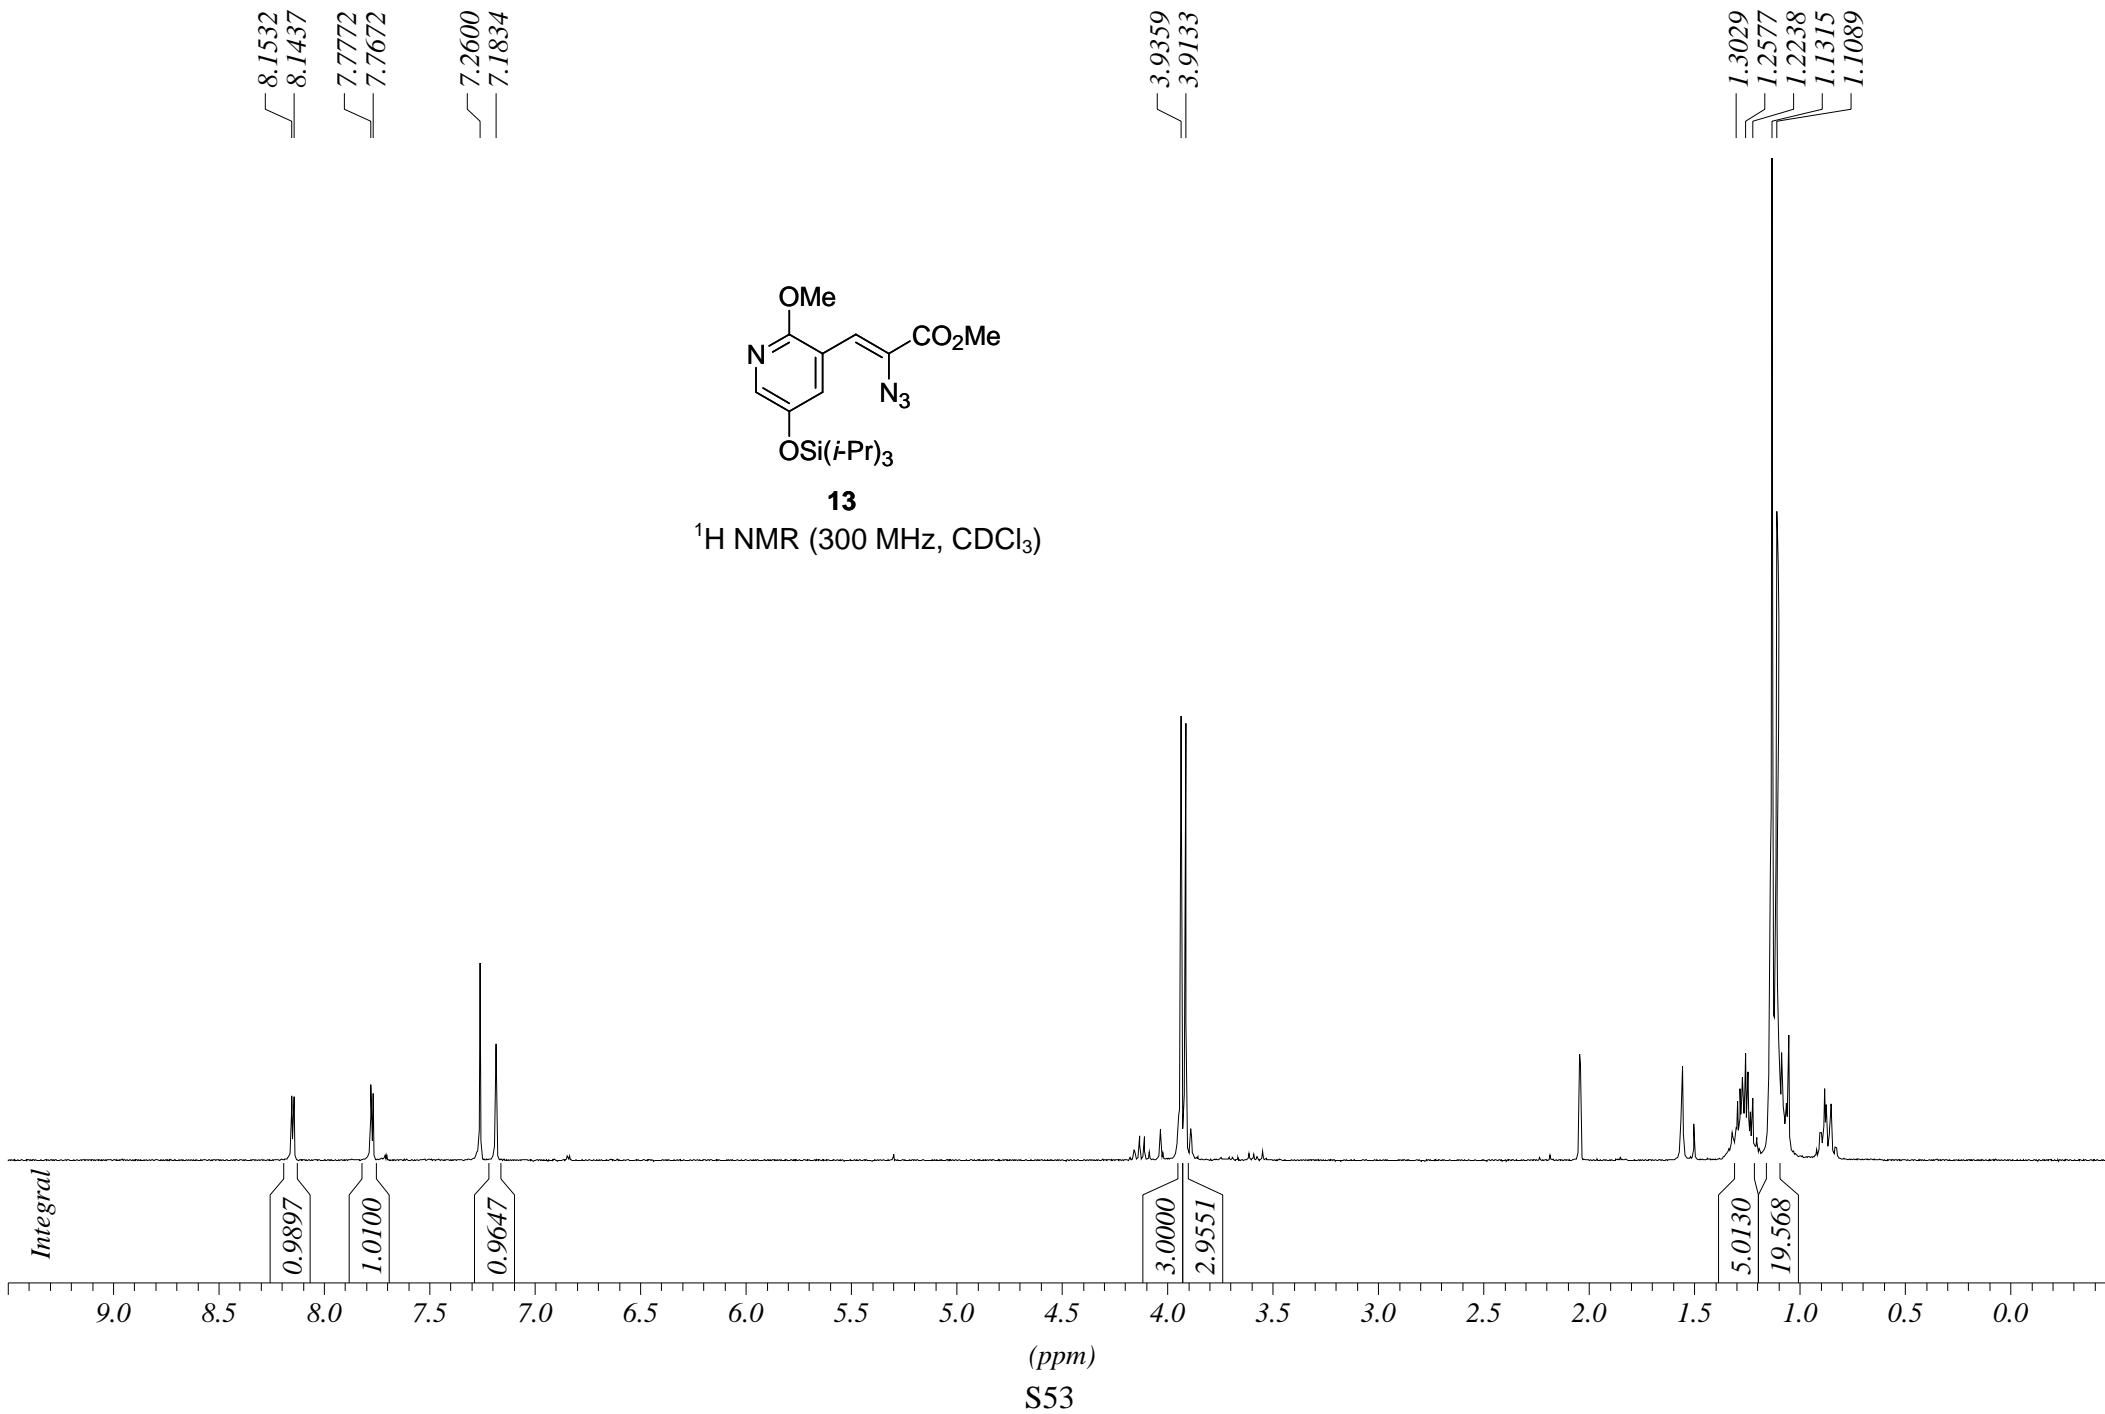

S633C/13C/CDCL3

163.804  
155.995  
147.075  
138.227  
130.299  
126.560  
117.979  
116.230  
77.700  
77.065  
76.431  
53.793  
52.994  
17.869  
12.567

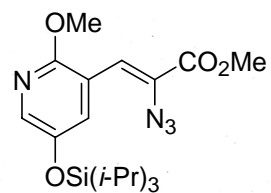

13

<sup>13</sup>C NMR (50 MHz, CDCl<sub>3</sub>)

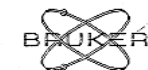

AV040F.127  
AU PROG:  
X02.AU  
DATE 5-4-6  
TIME 1:37

SF 50.323  
SY 50.0  
Q1 8396.387  
SI 65536  
TD 65536  
SW 12500.000  
HZ/PT .381

PW 0.0  
RD 0.0  
AQ 2.621  
RG 400  
NS 4096  
TE 297

FW 15700  
Q2 3154.531  
DP 15H D0

LB 1.000  
GB 0.0  
CX 35.00  
CY 20.00  
F1 225.342P  
F2 -23.044P  
HZ/CM 357.132  
PPM/CM 7.097  
SR 3314.07

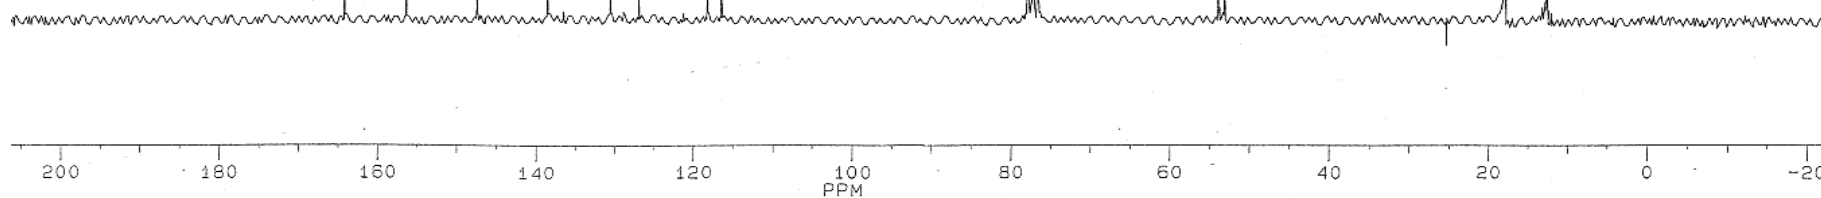

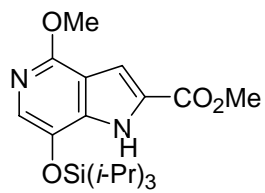

**14**

$^1\text{H}$  NMR (300 MHz,  $\text{CDCl}_3$ )

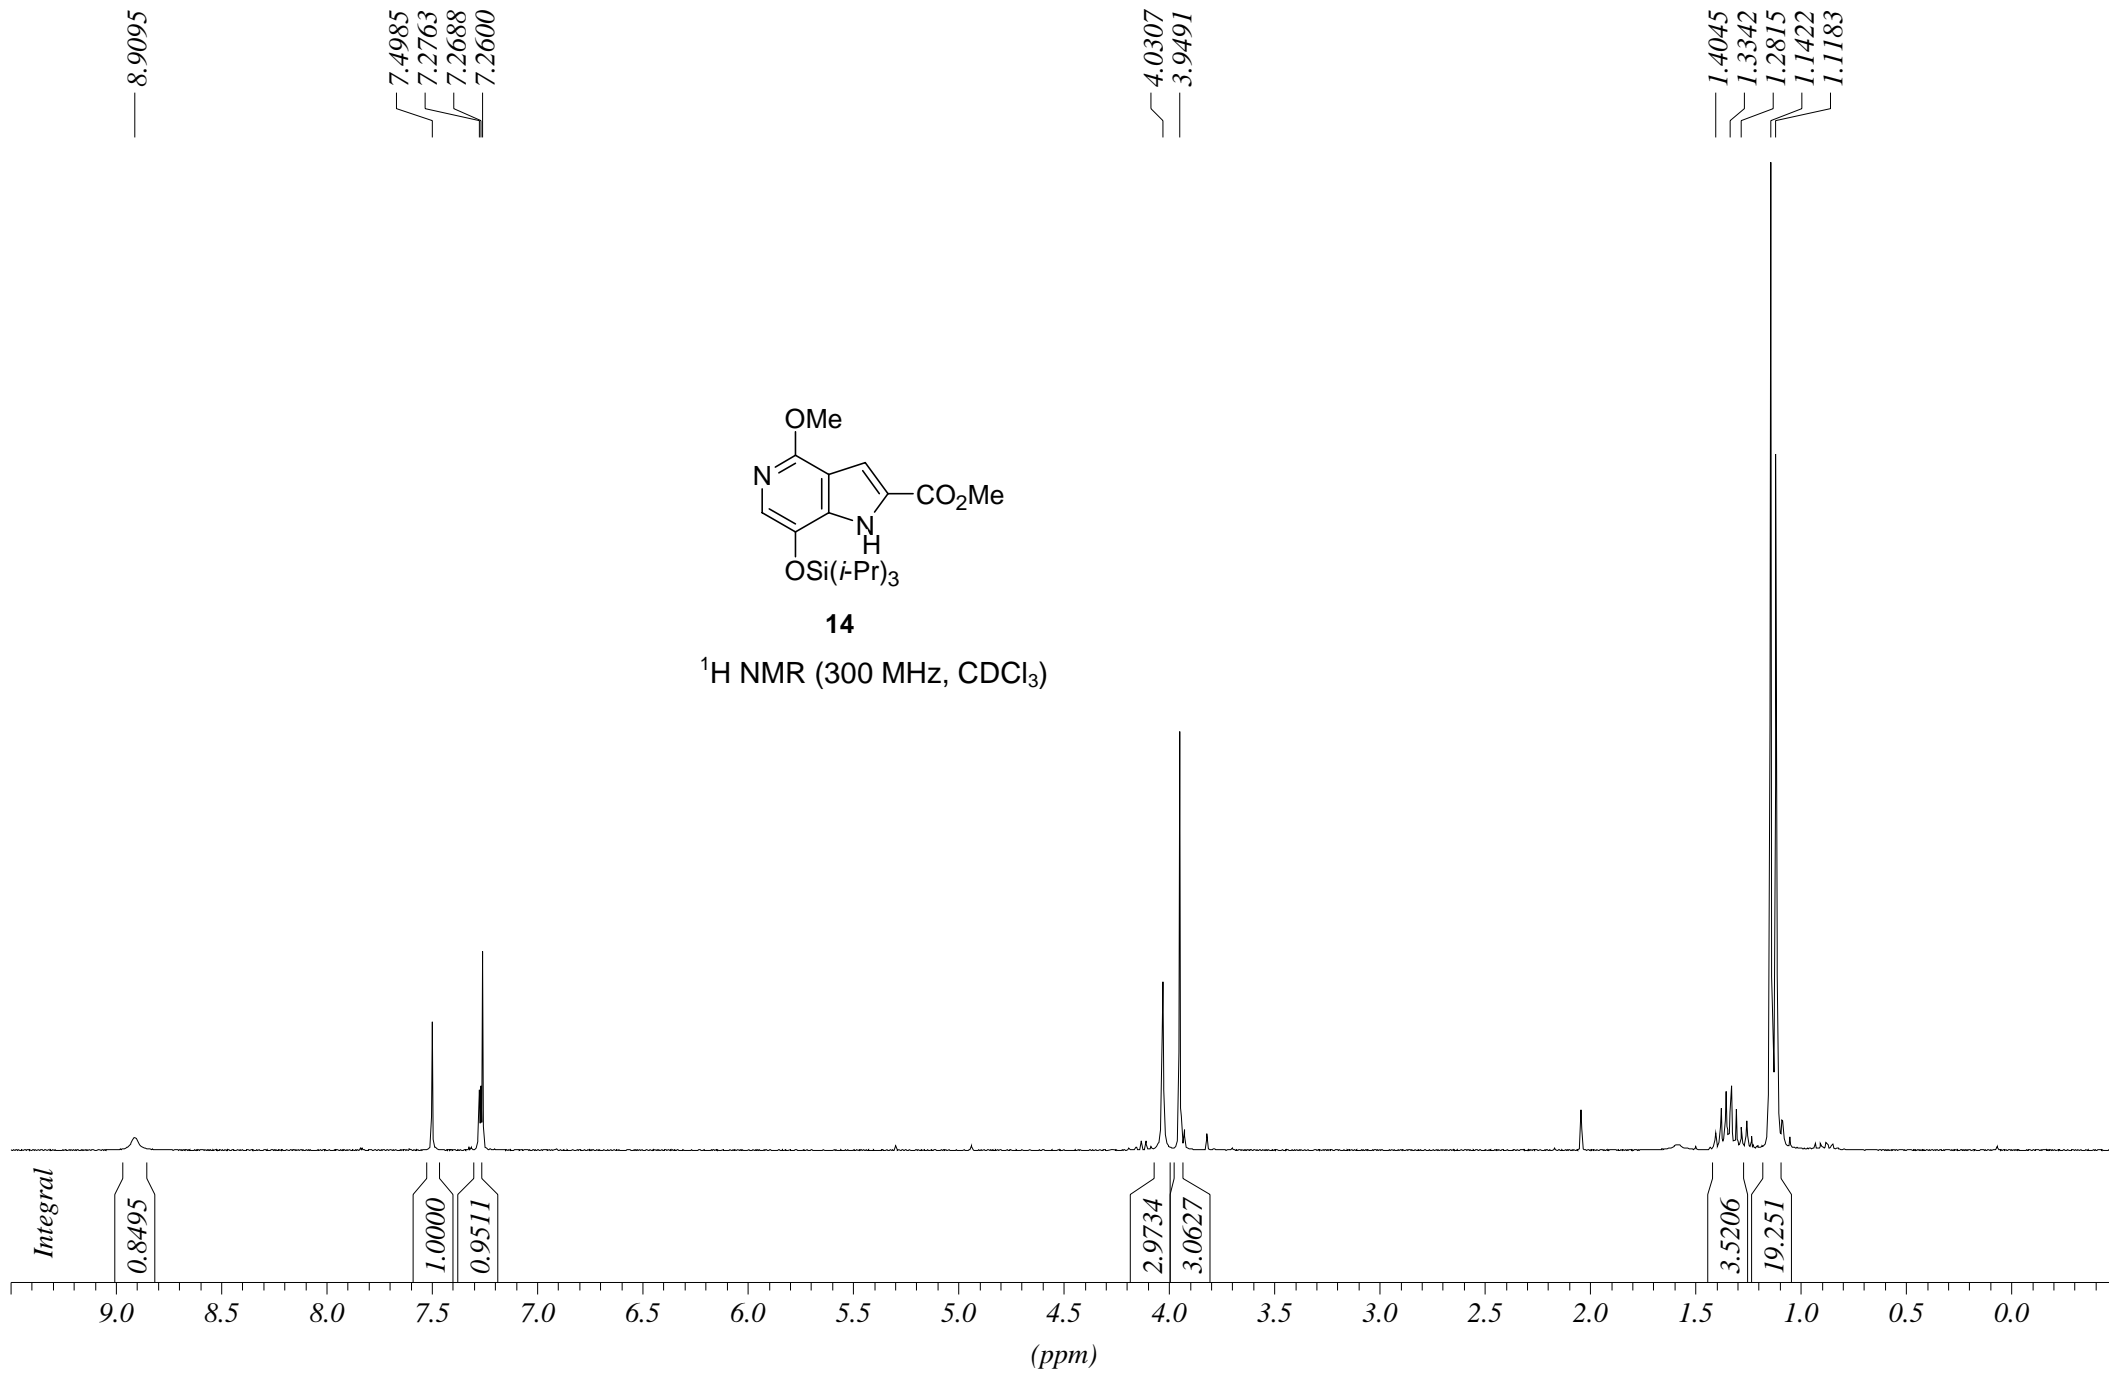

S55

SG38C/13C/CDCL3

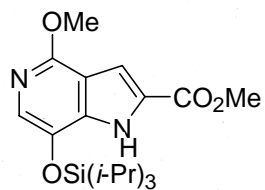

14

<sup>13</sup>C NMR (50 MHz, CDCl<sub>3</sub>)

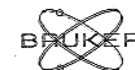

AV110F.130  
AU PROG:  
X02.AU  
DATE 11-4-6  
TIME 23:39

SF 50.323  
SY 50.0  
O1 8396.387  
SI 65536  
TD 65536  
SW 12500.000  
HZ/PT .381

PW 0.0  
RD 0.0  
AQ 2.621  
RG 400  
NS 3200  
TE 297

FW 15700  
O2 3154.531  
DP 15H D0

LB 1.000  
GB 0.0  
CX 35.00  
CY 20.00  
F1 225.069P  
F2 -23.317P  
HZ/CM 357.132  
PPM/CM 7.097  
SR 3314.07

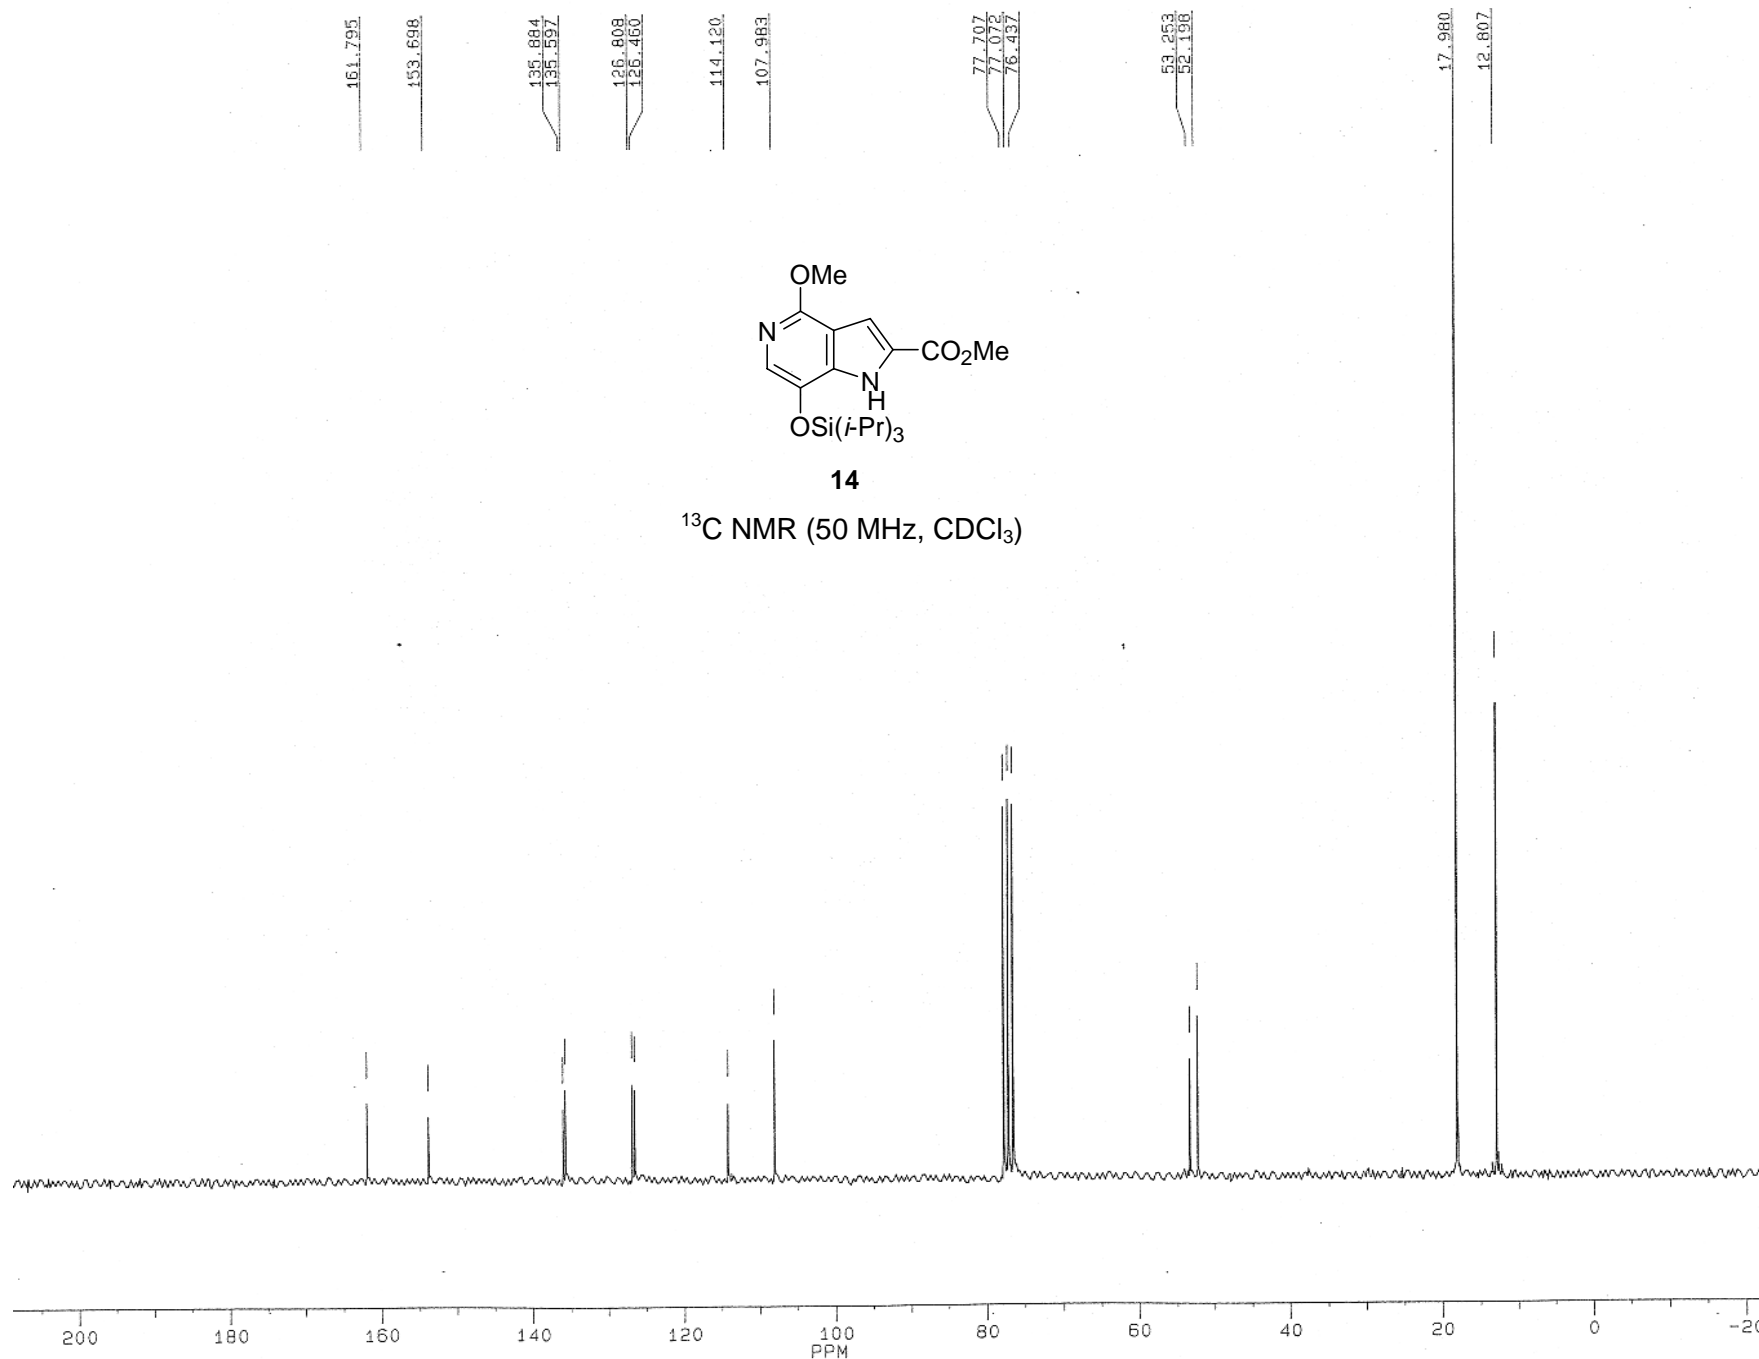



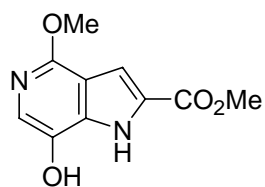

**3a**

<sup>1</sup>H NMR (300 MHz, DMSO-d<sub>6</sub>)  
Spectrum after TBAF mediated  
deprotection of **14**

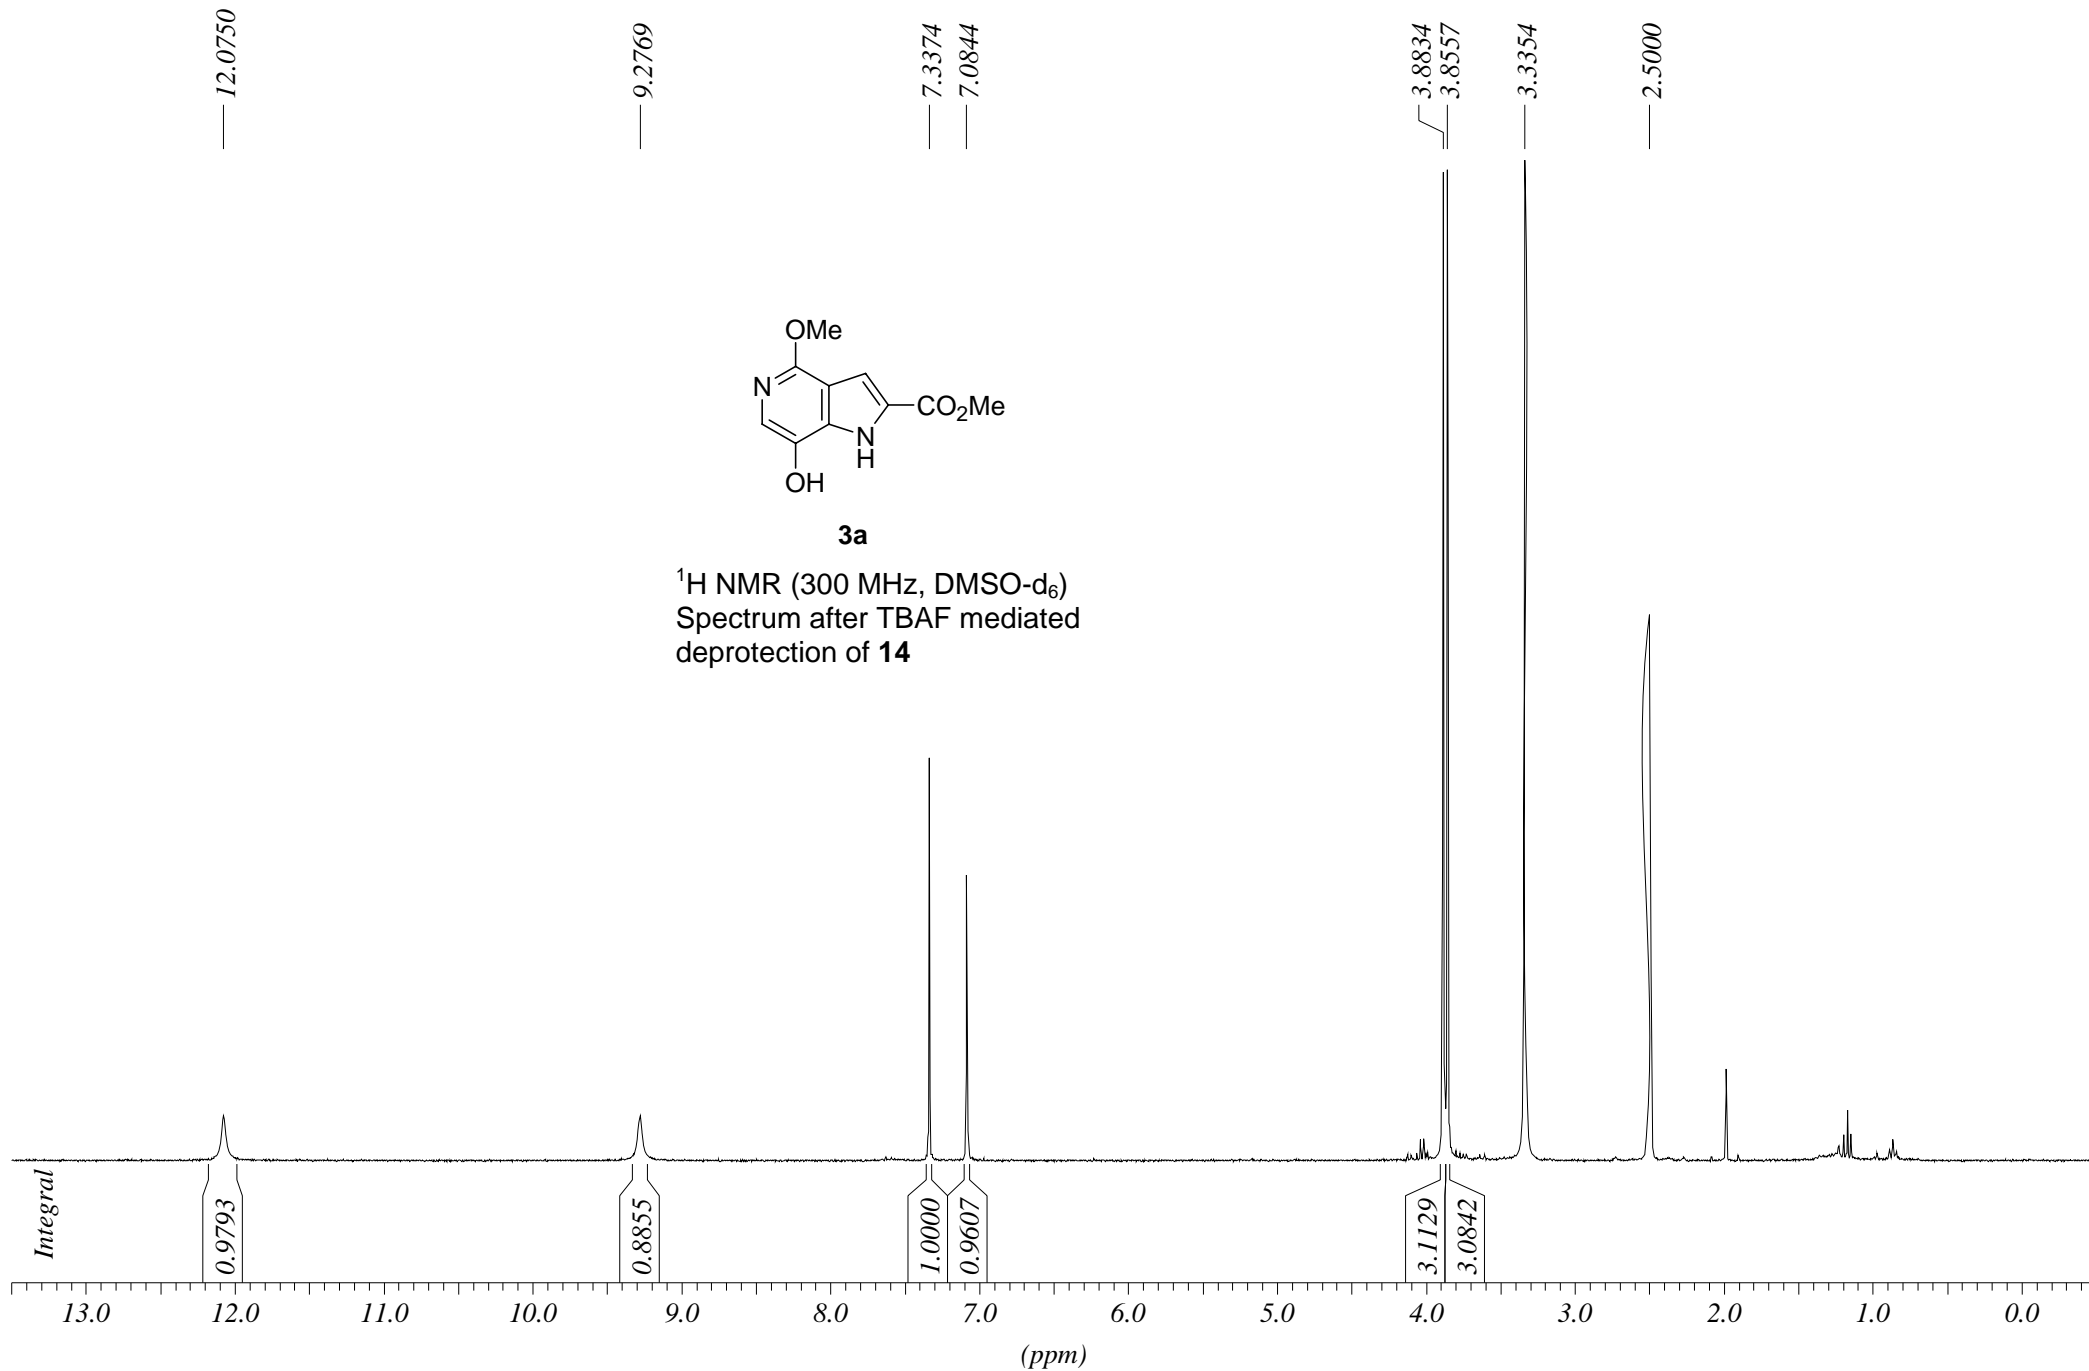



**3a**

<sup>1</sup>H NMR (300 MHz, DMSO-d<sub>6</sub>)  
Spectrum after BBr<sub>3</sub> mediated  
demethylation of **2a**

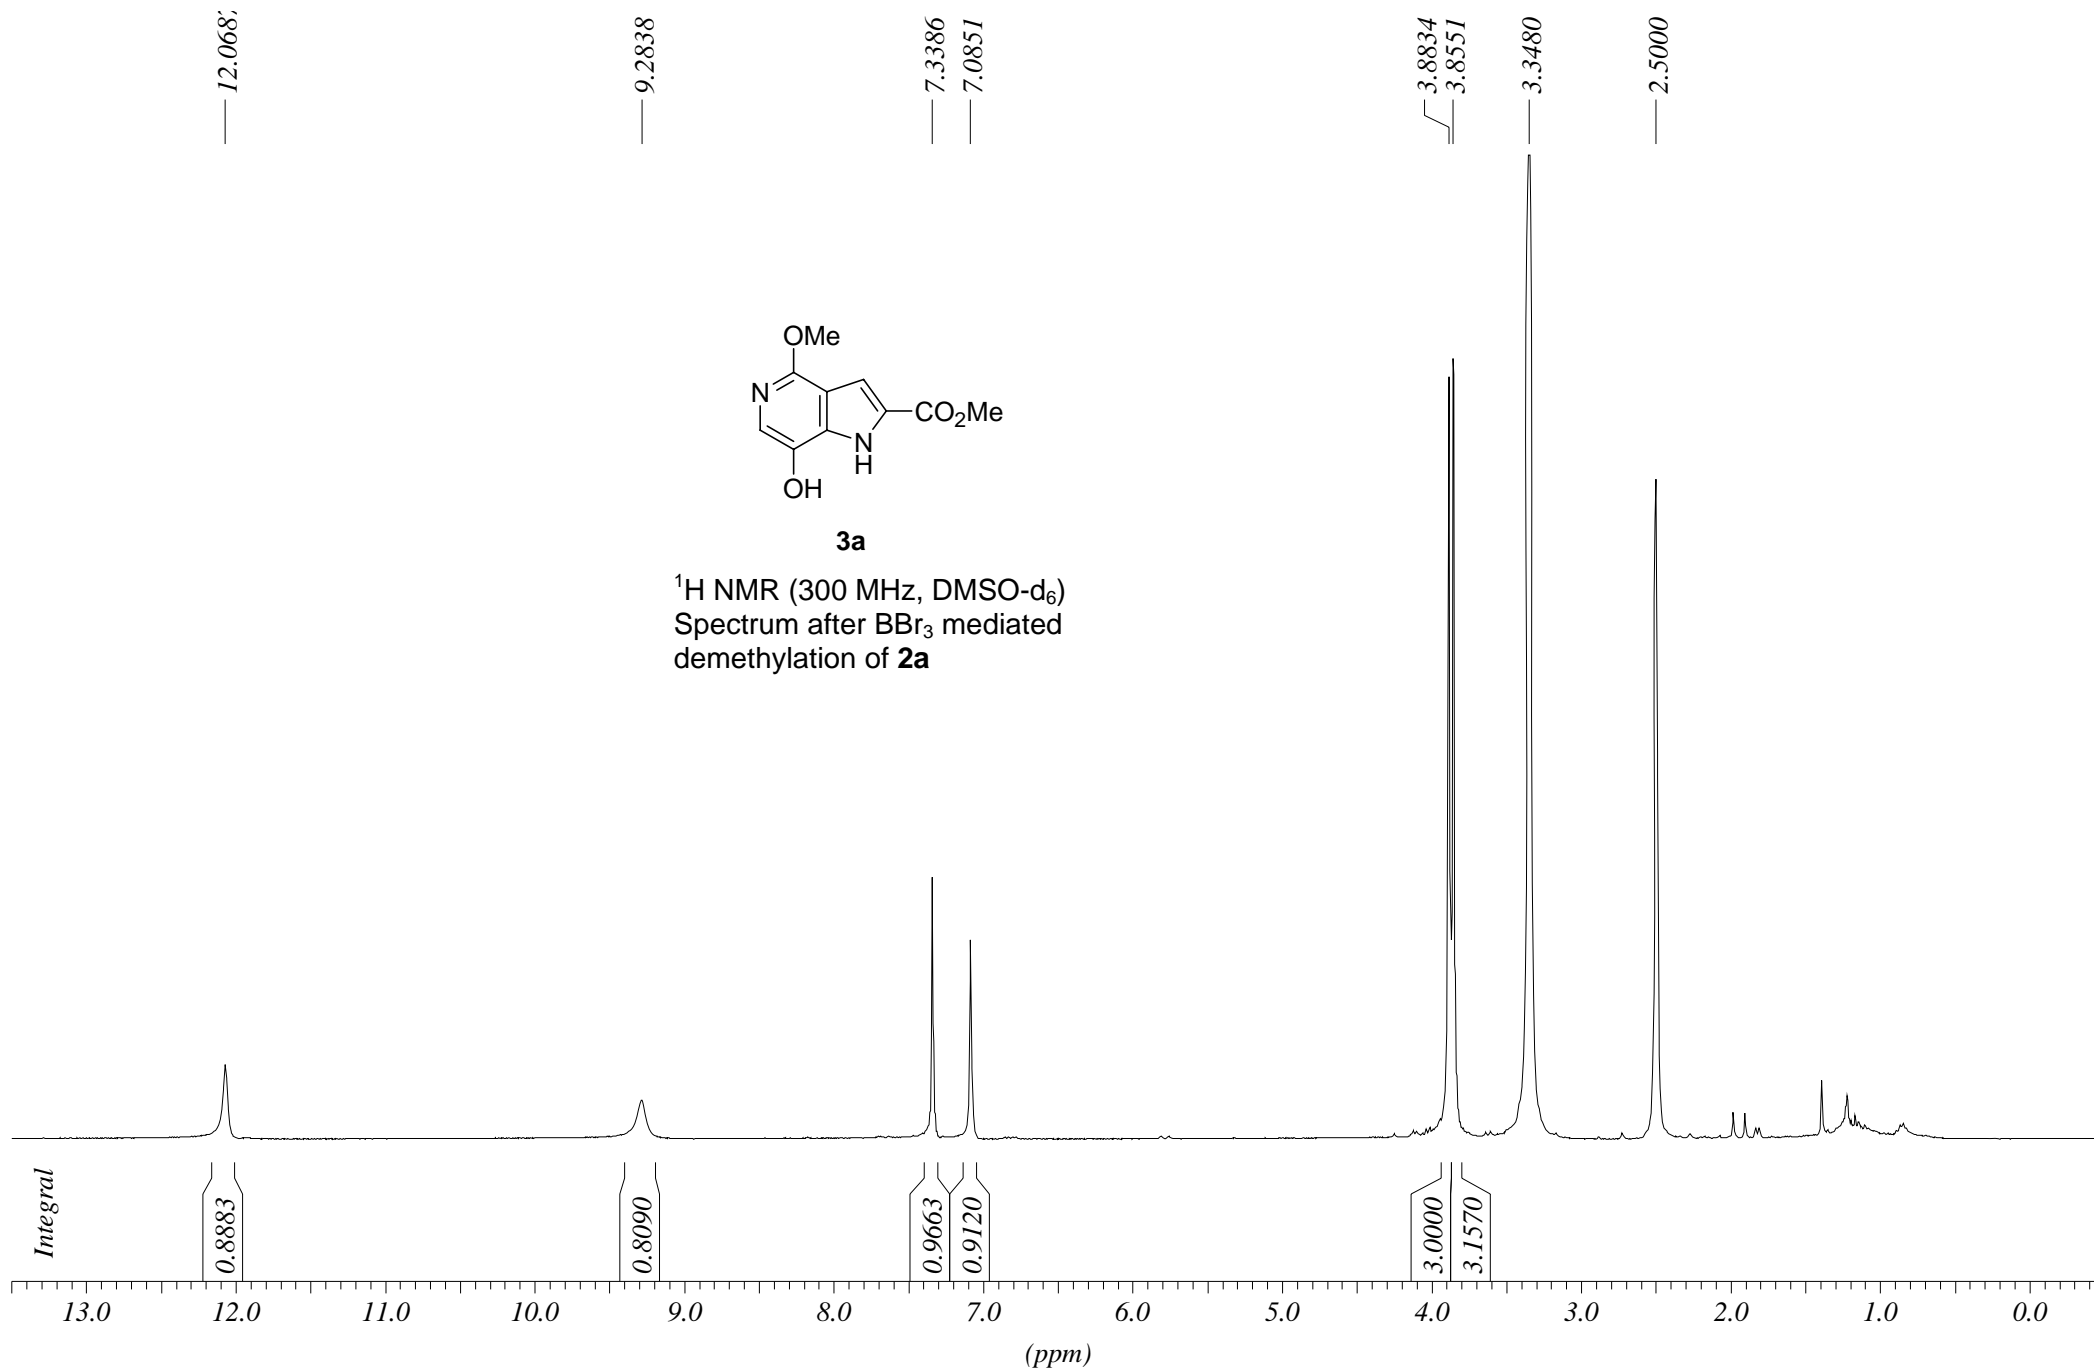

SG41C/13C/DMSO

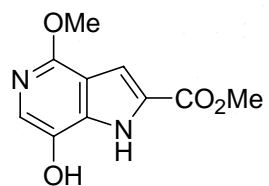

3a

<sup>13</sup>C NMR (50 MHz, DMSO-d<sub>6</sub>)

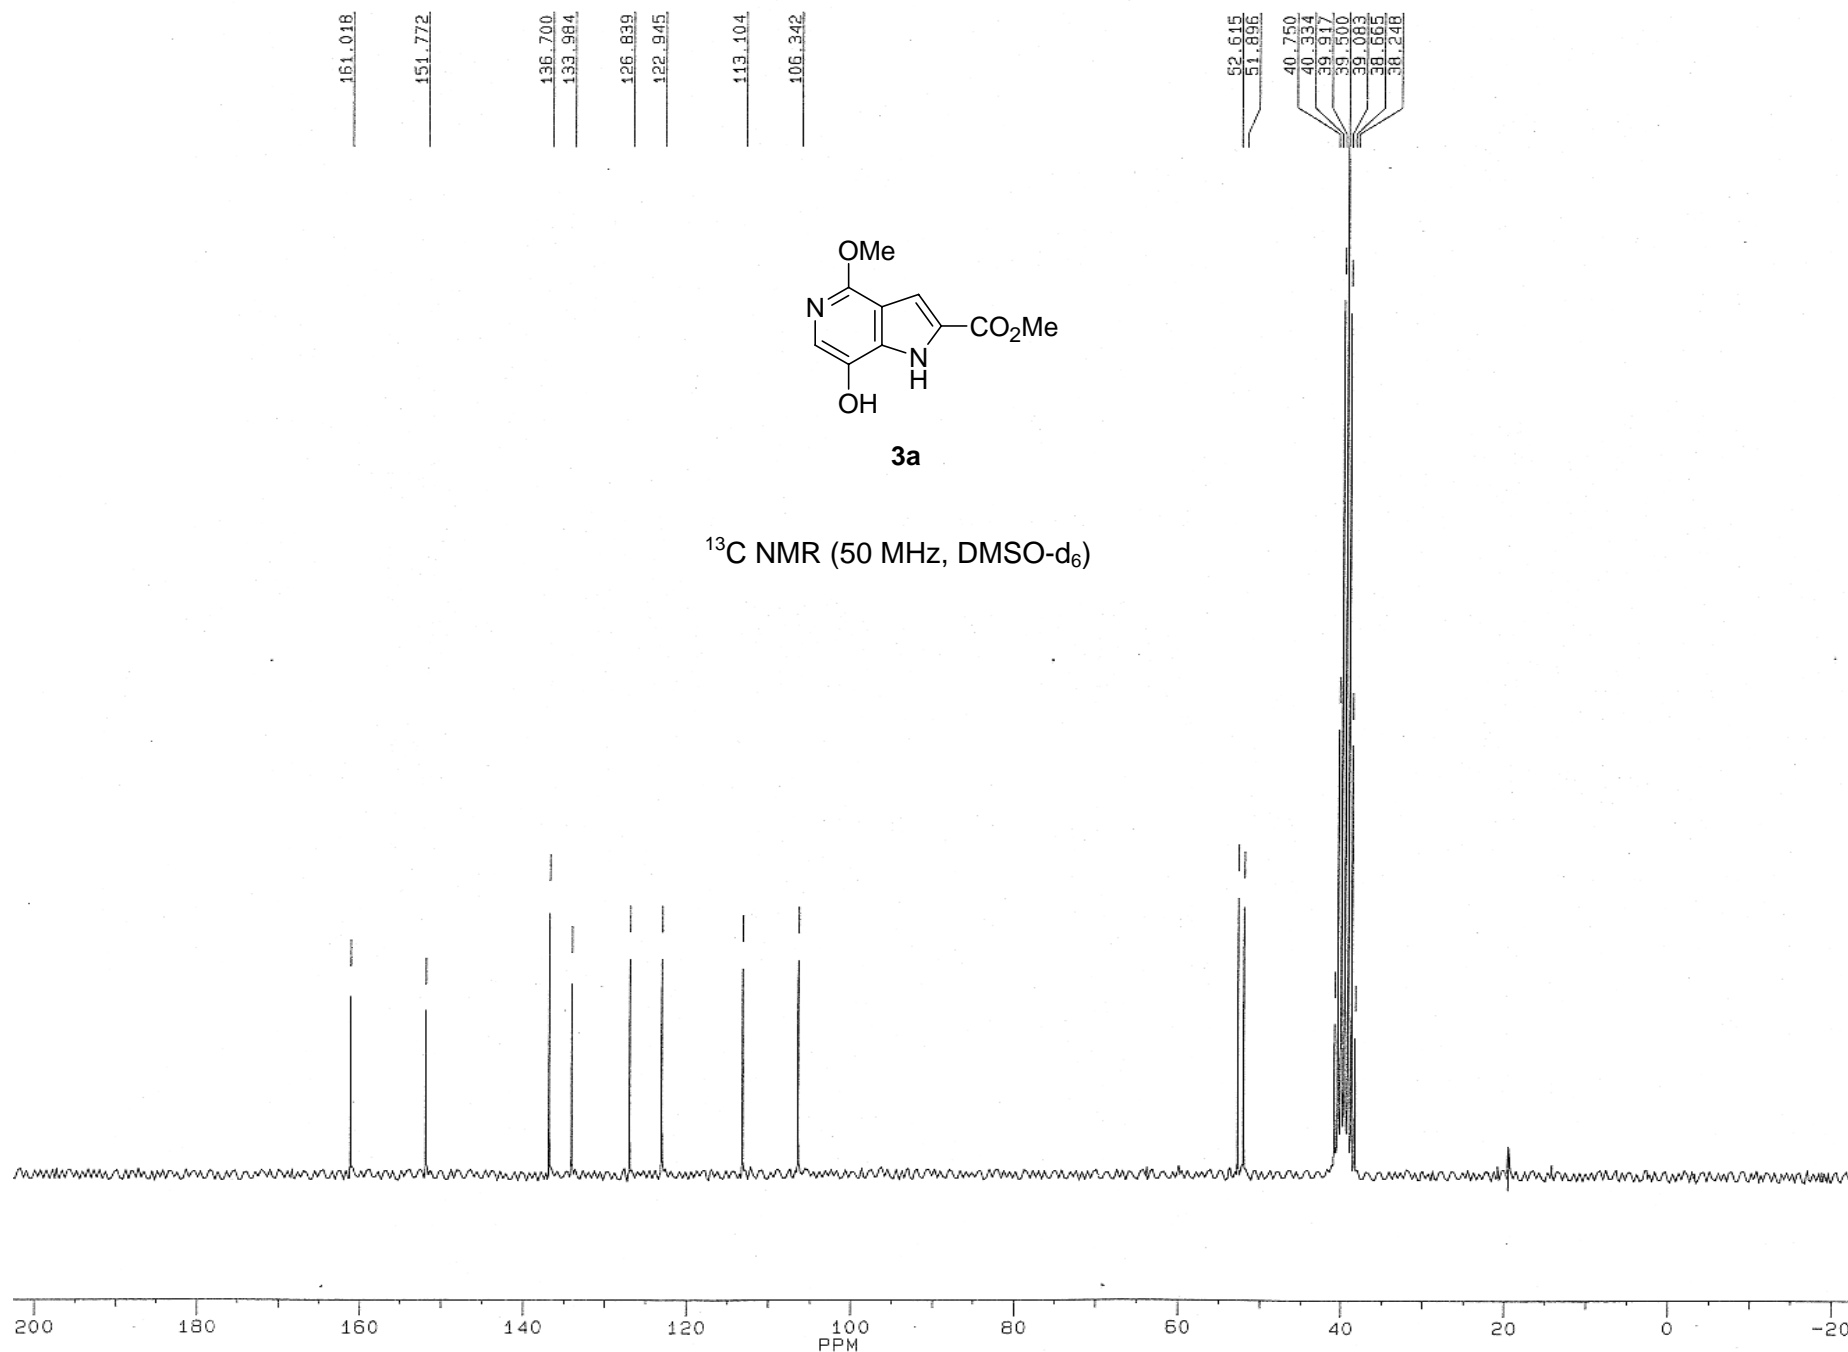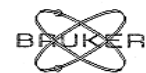

MA020F.130  
AU PROG:  
X02 AU  
DATE 3-5-6  
TIME 1: 00

SF 50.324  
SY 50.0  
Q1 8658.669  
SI 65536  
TD 65536  
SW 12500.000  
HZ/PT .381

PW 0.0  
RD 0.0  
AQ 2.621  
RG 400  
NS 4096  
TE 297

FW 15700  
Q2 4089.399  
DP 15H D0

LB 1.000  
GB 0.0  
CX 35.00  
CY 20.00  
F1 225.575P  
F2 -22.810P  
HZ/CM 357.132  
PPM/CM 7.097  
SR 3578.31

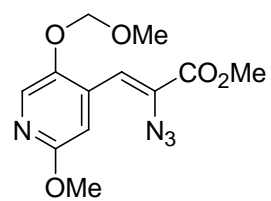

**15a**

$^1\text{H}$  NMR (300 MHz,  $\text{CDCl}_3$ )

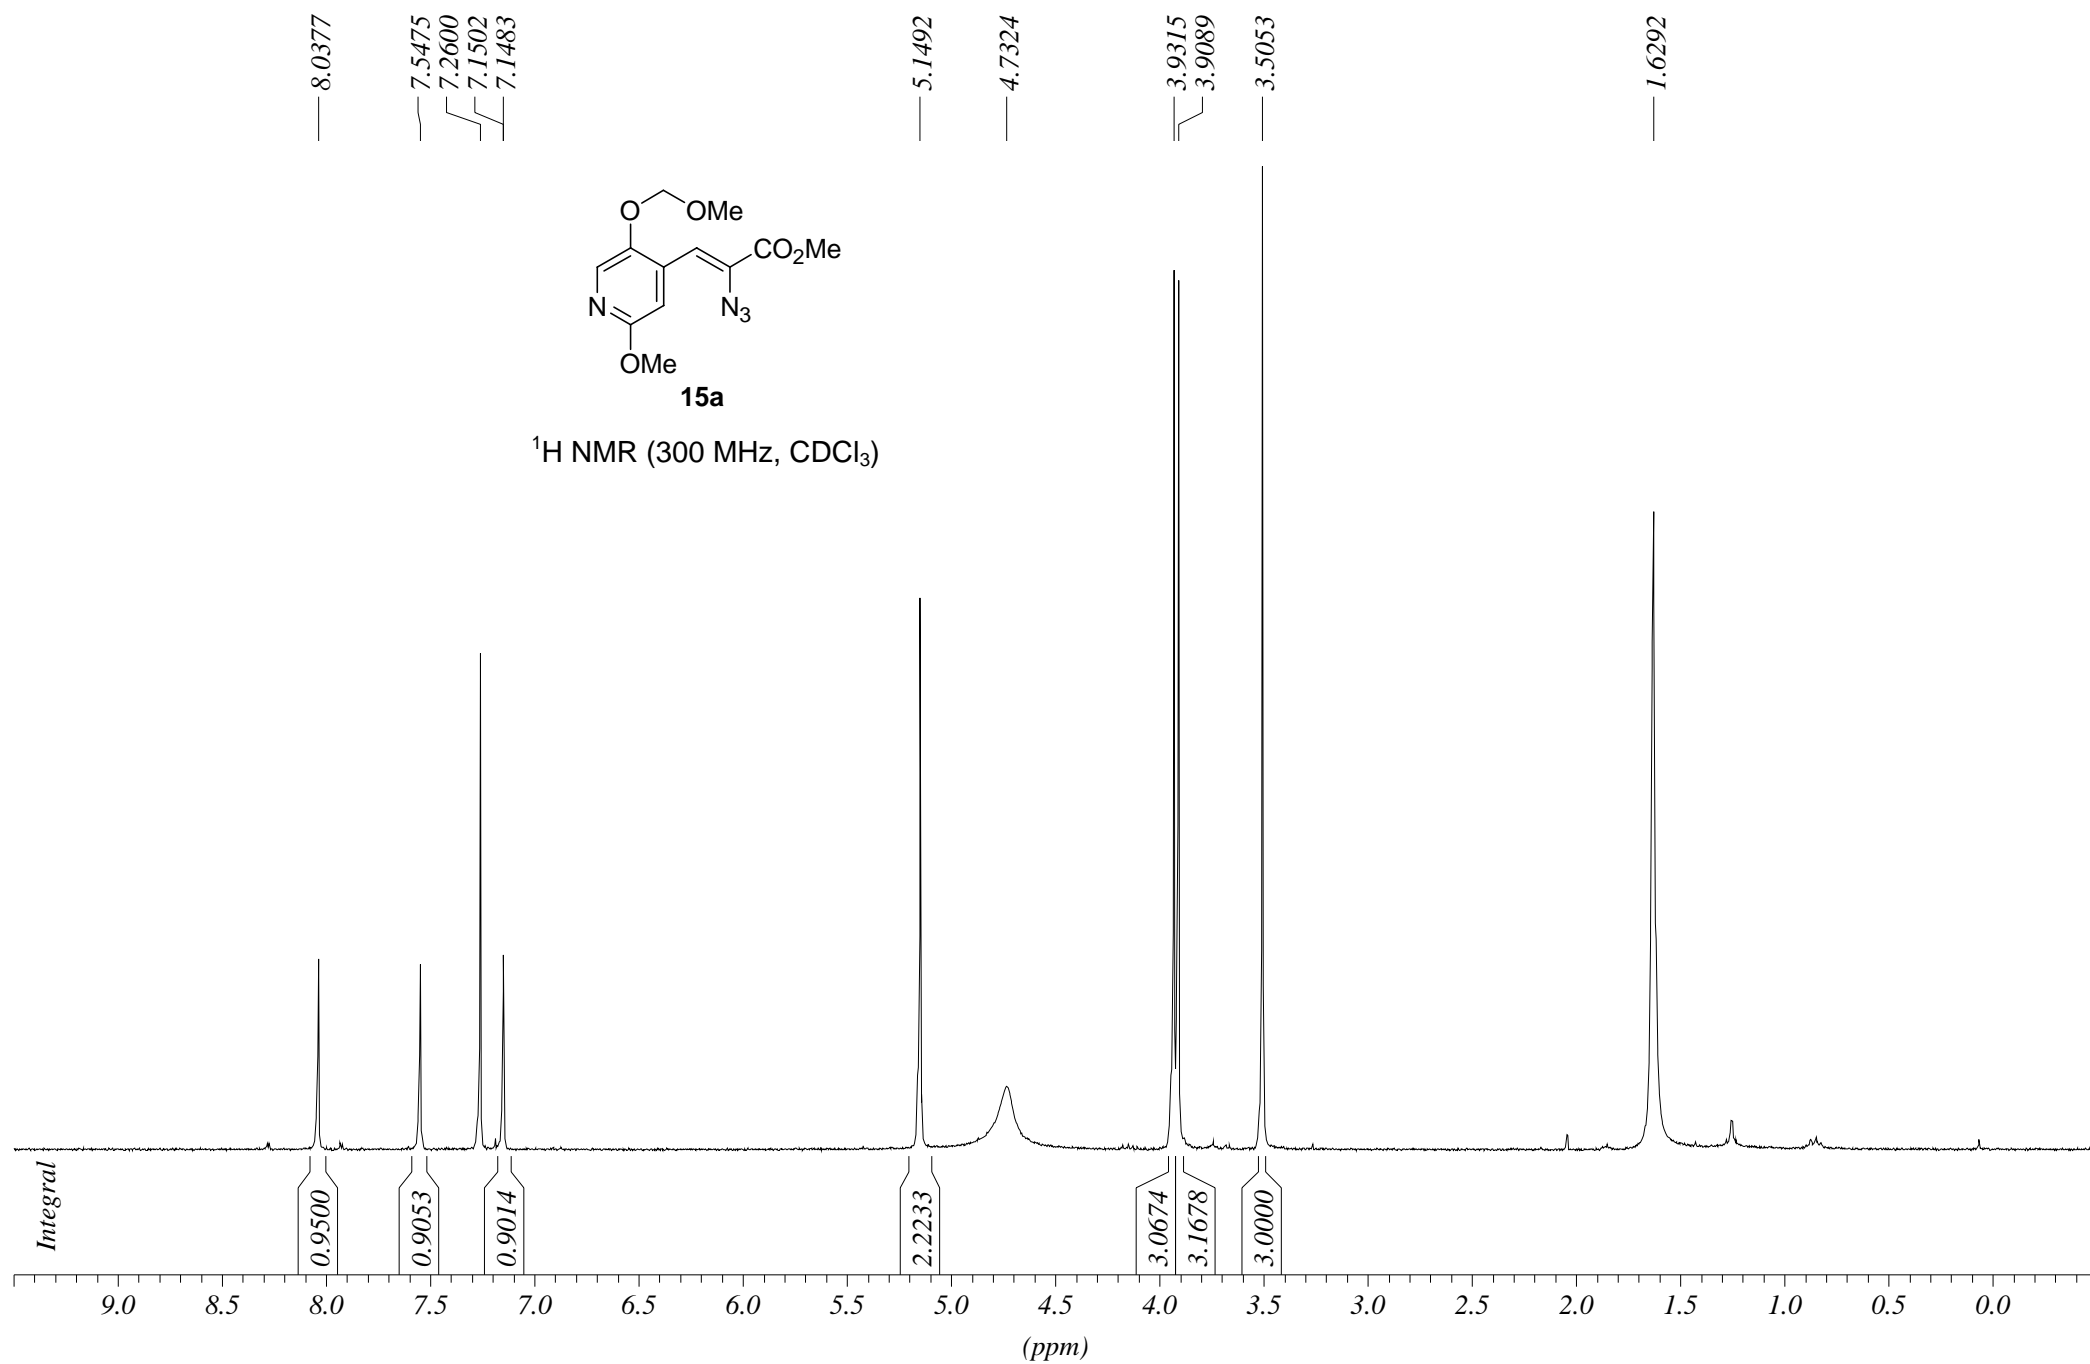

SG39C/13C/CDCL3

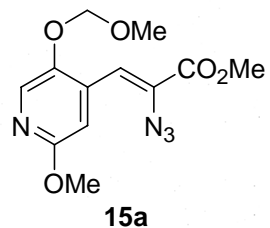

$^{13}\text{C}$  NMR (50 MHz,  $\text{CDCl}_3$ )

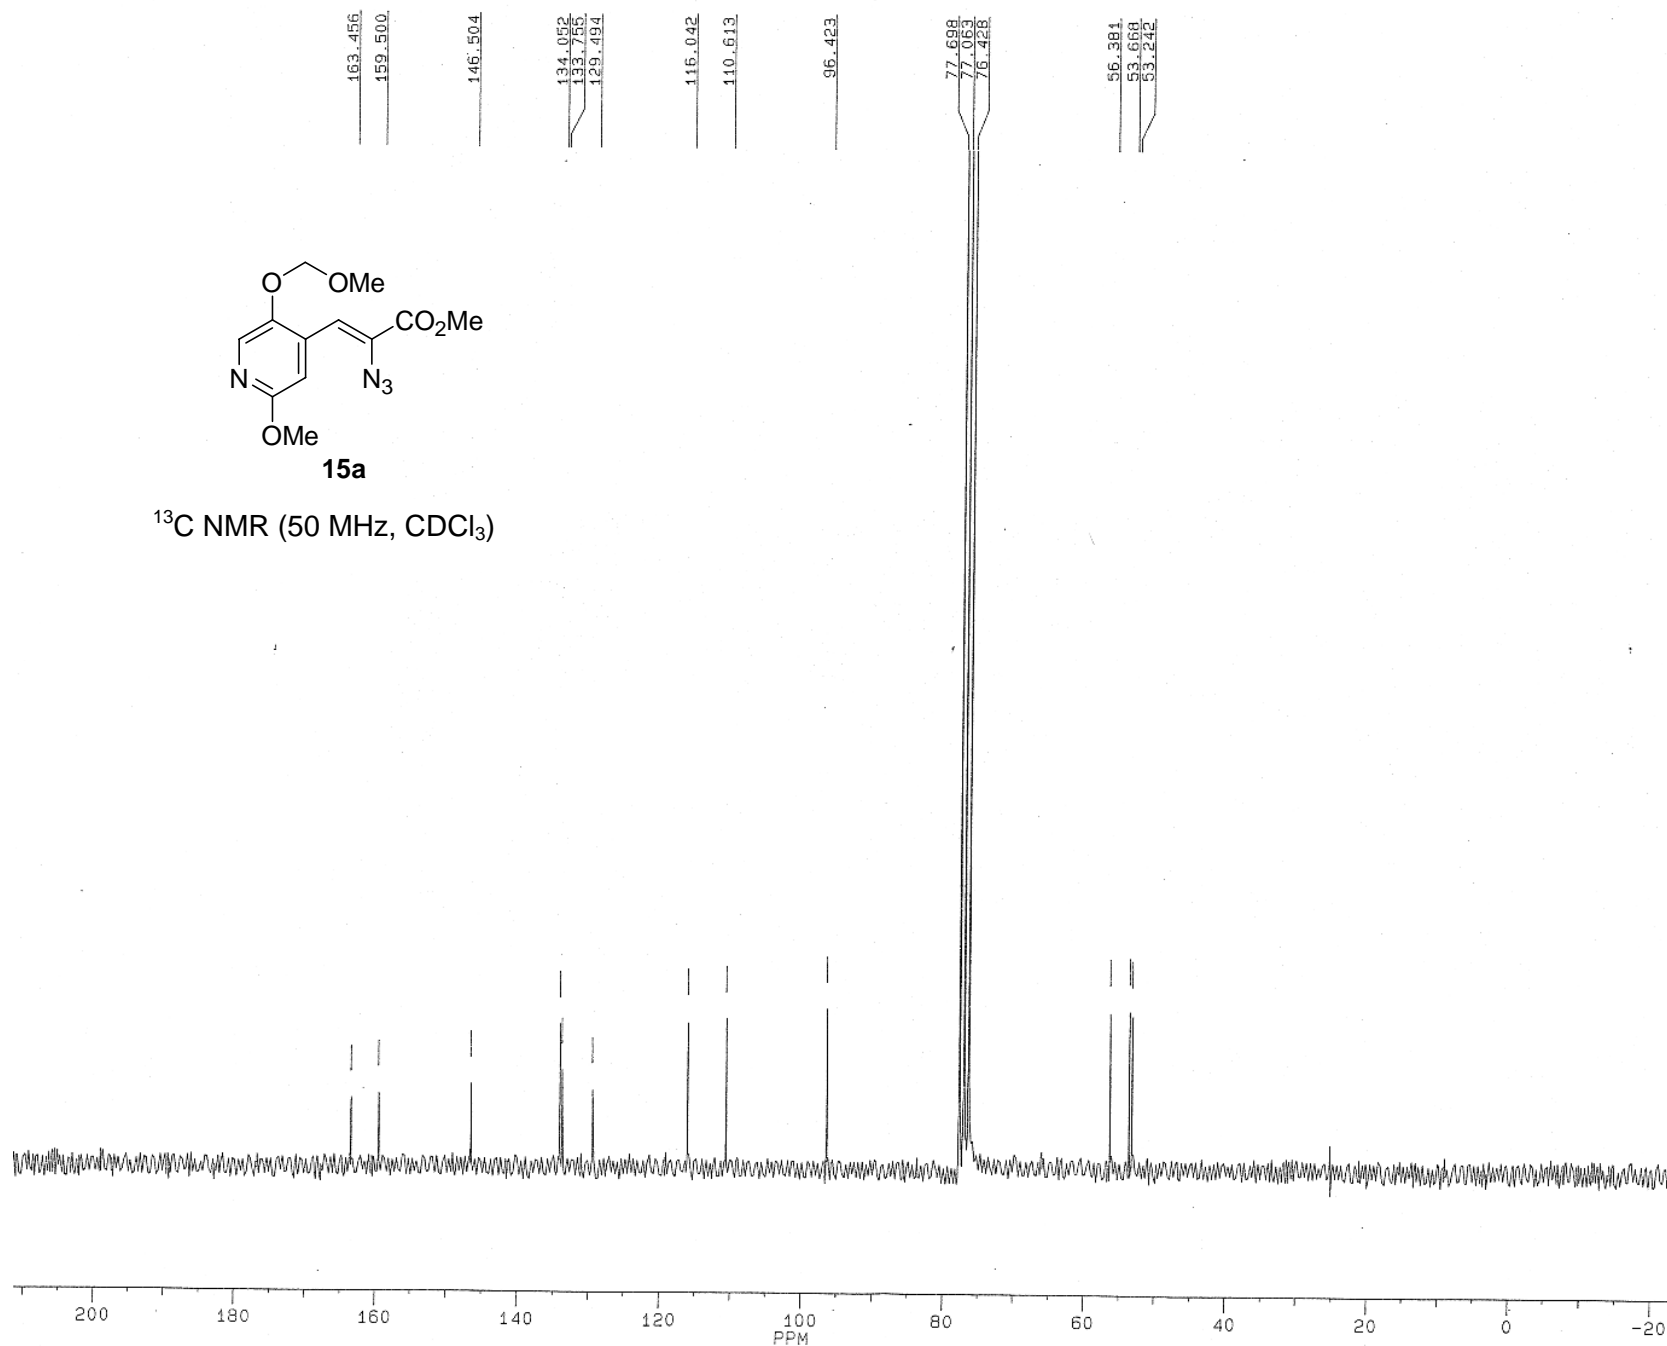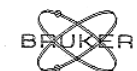

AV120F.140  
AU PROG:  
X02.AU  
DATE 12-4-6  
TIME 23:59

SF 50.323  
SY 50.0  
Q1 8396.387  
SI 65536  
TD 65536  
SW 12500.000  
HZ/PT .381

PW 0.0  
RD 0.0  
AQ 2.621  
RG 400  
NS 3200  
TE 297

FW 15700  
Q2 3154.531  
DP 15H D0

LB 1.000  
GB 0.0  
CX 35.00  
CY 20.00  
F1 225.342P  
F2 -23.044P  
HZ/CM 357.132  
PPM/CM 7.097  
SR 3314.07

9.2076  
7.5443  
7.2631  
7.2600  
7.2525

5.2571  
4.0702  
3.9629  
3.5505

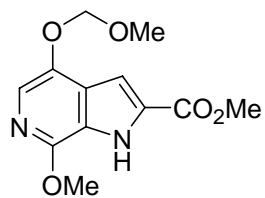

**16a**

<sup>1</sup>H NMR (300 MHz, CDCl<sub>3</sub>)

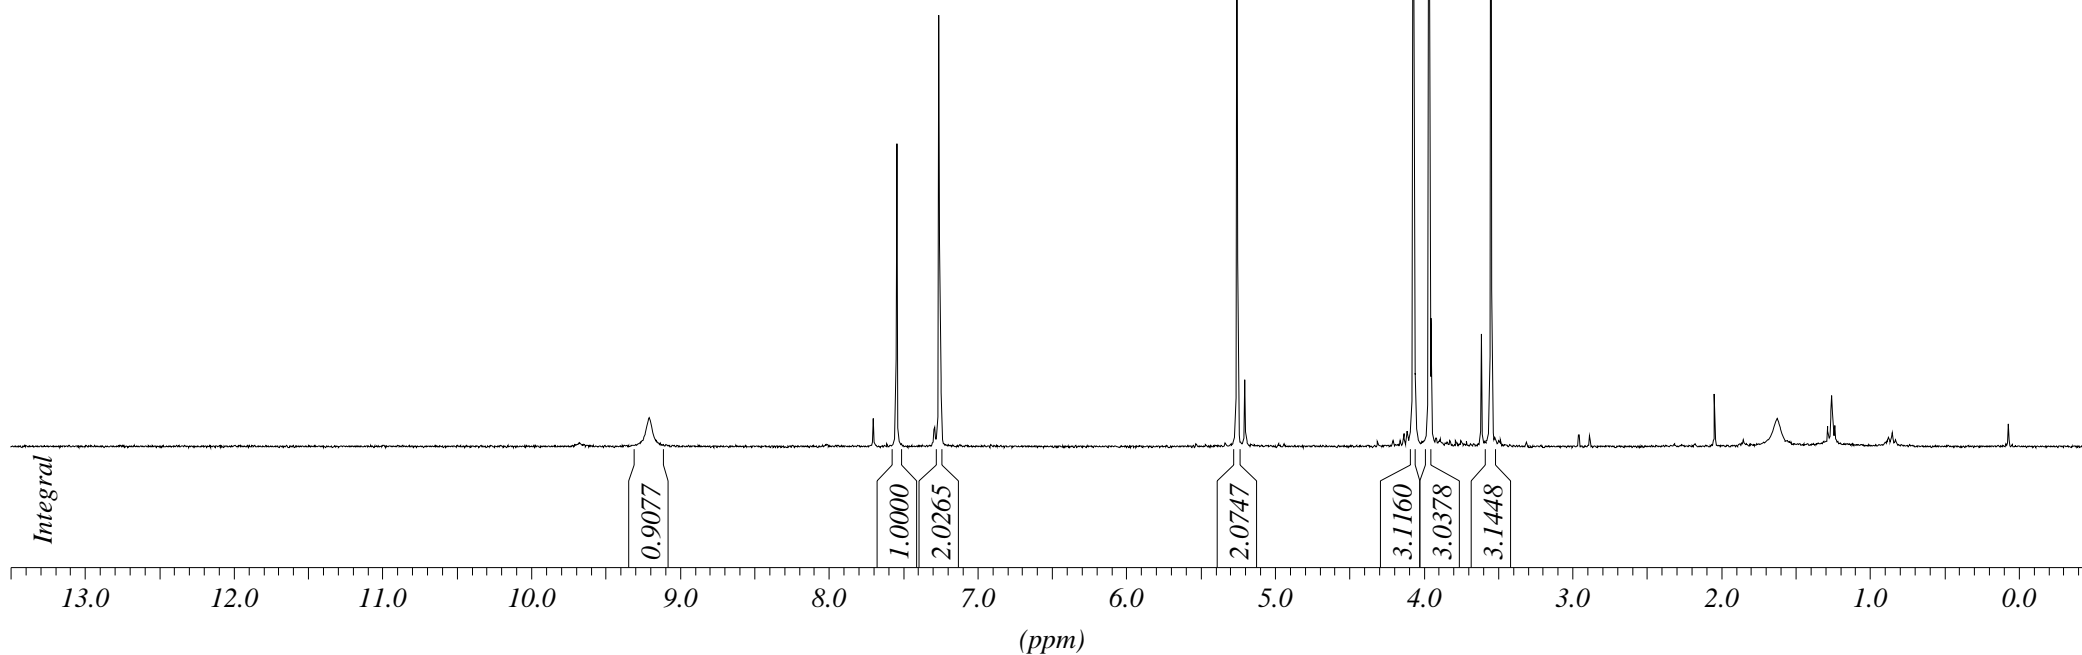

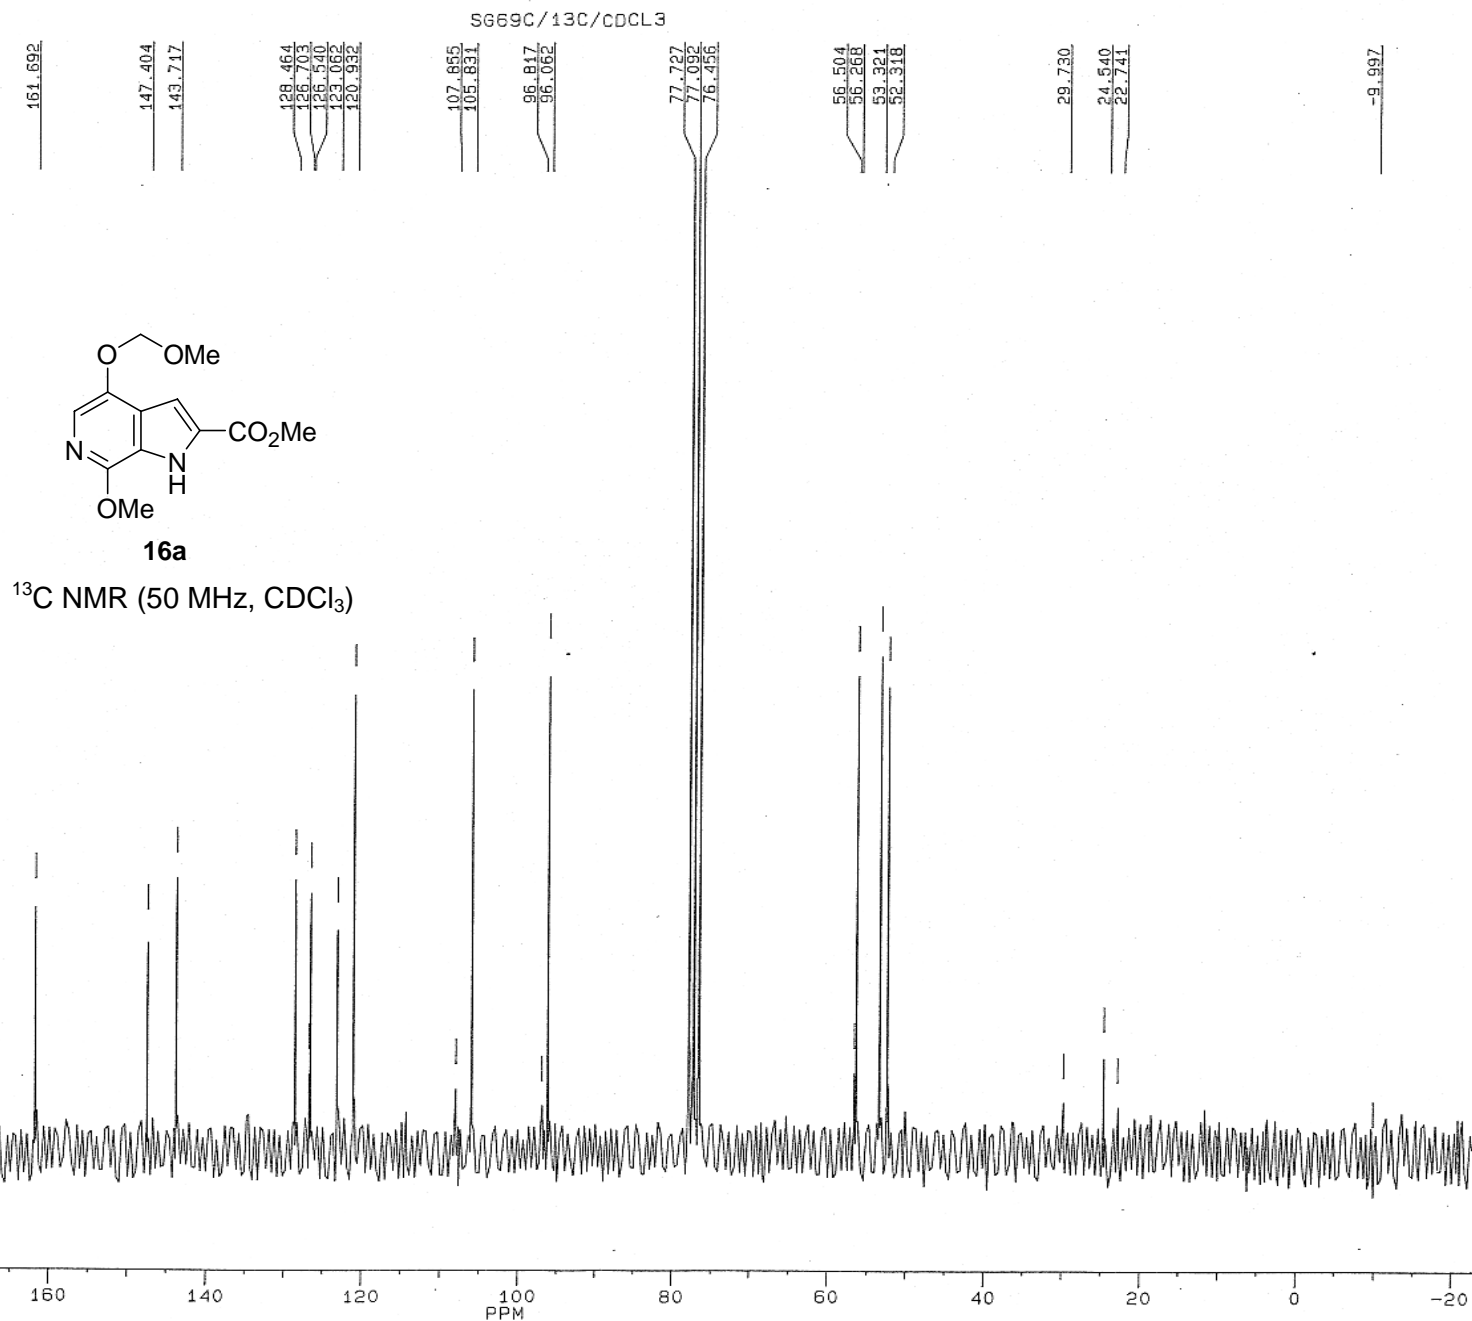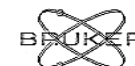

MA231F.101  
 AU PROG:  
 X02.AU  
 DATE 23-5-6  
 TIME 15:06

SF 50.323  
 SY 50.0  
 O1 8396.387  
 SI 65536  
 TD 65536  
 SW 12500.000  
 HZ/PT .381

PW 0.0  
 RD 0.0  
 AQ 2.621  
 RG 400  
 NS 546  
 TE 297

FW 15700  
 O2 3154.531  
 DP 15H CPD

LB 1.000  
 GB 0.0  
 CX 35.00  
 CY 20.00  
 F1 225.615P  
 F2 22.771P  
 HZ/CM 357.132  
 PPM/CM 7.097  
 SR 3314.07

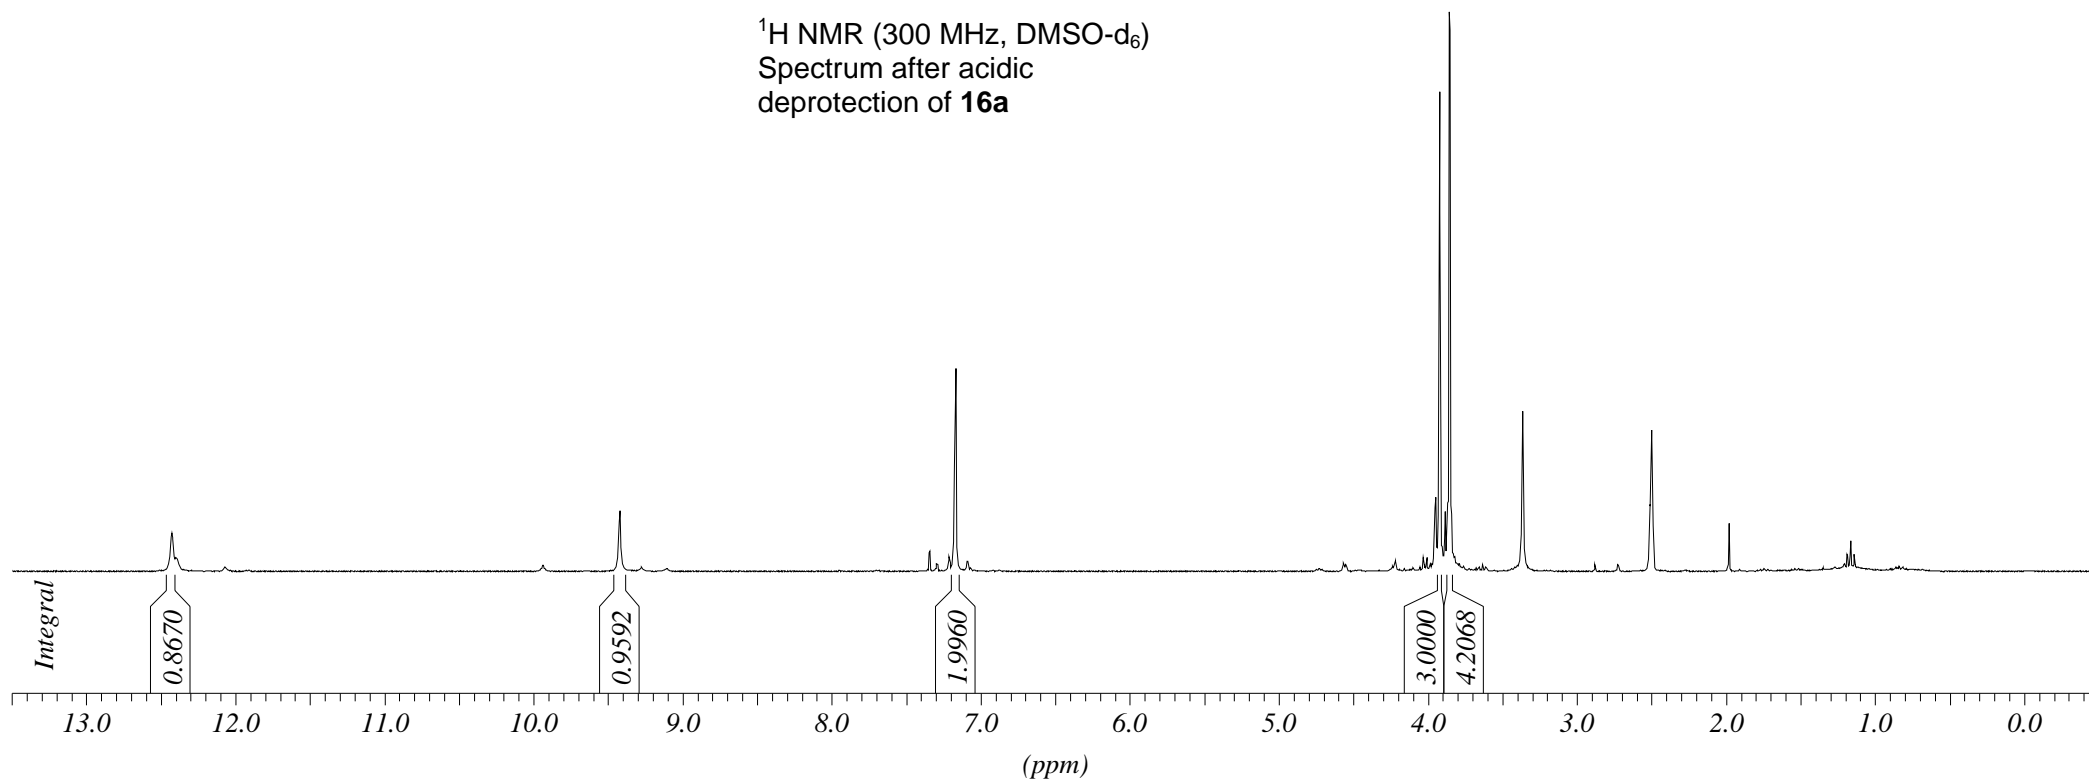



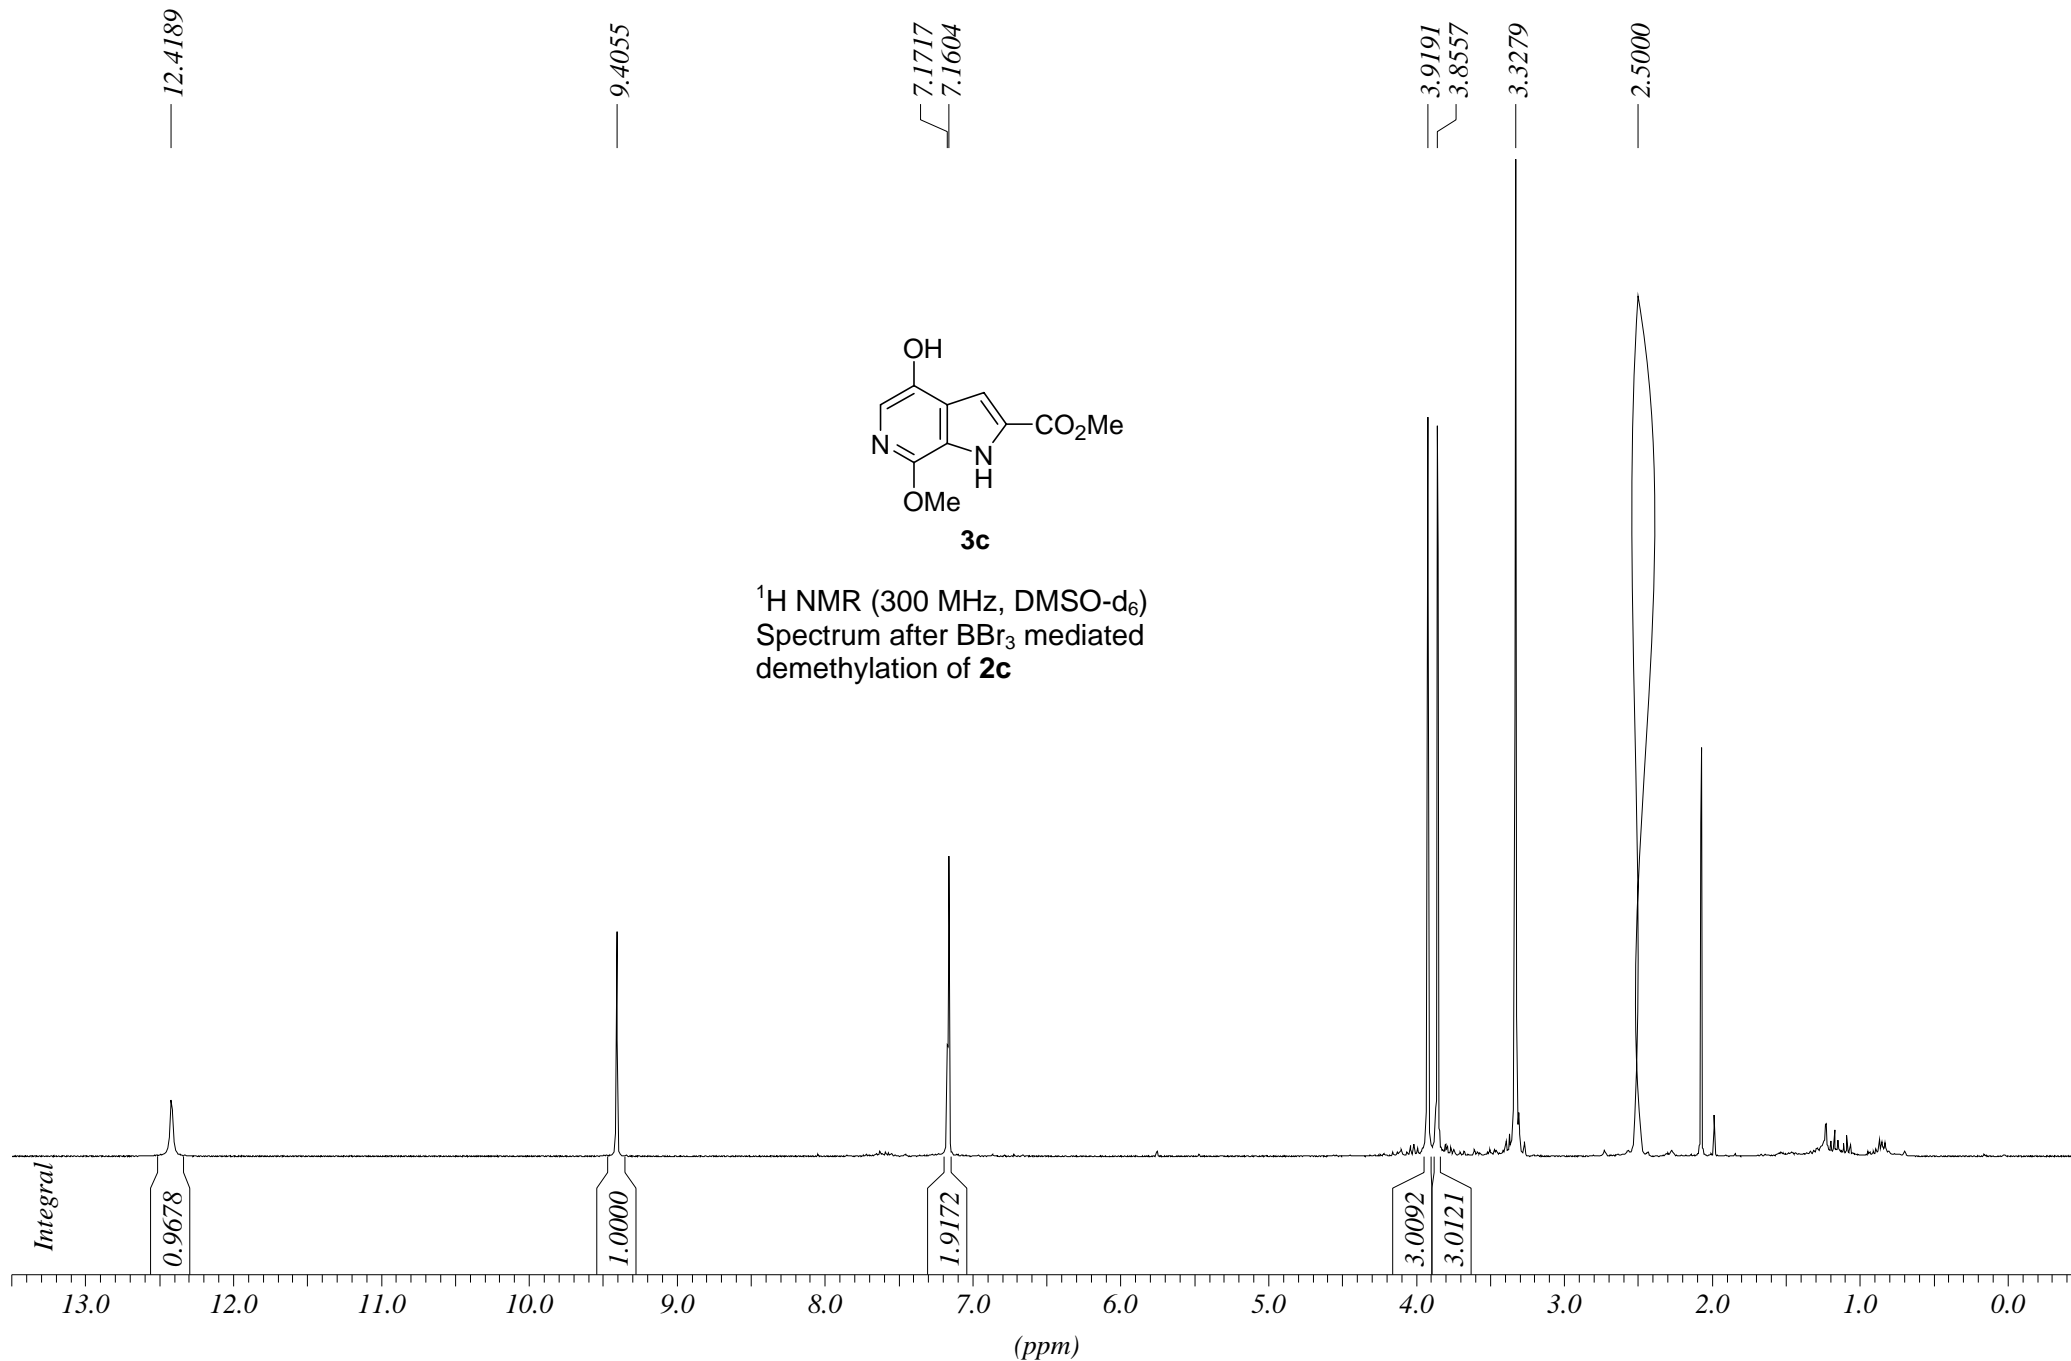

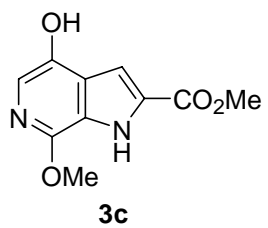

$^{13}\text{C}$  NMR (75 MHz, DMSO- $\text{d}_6$ )

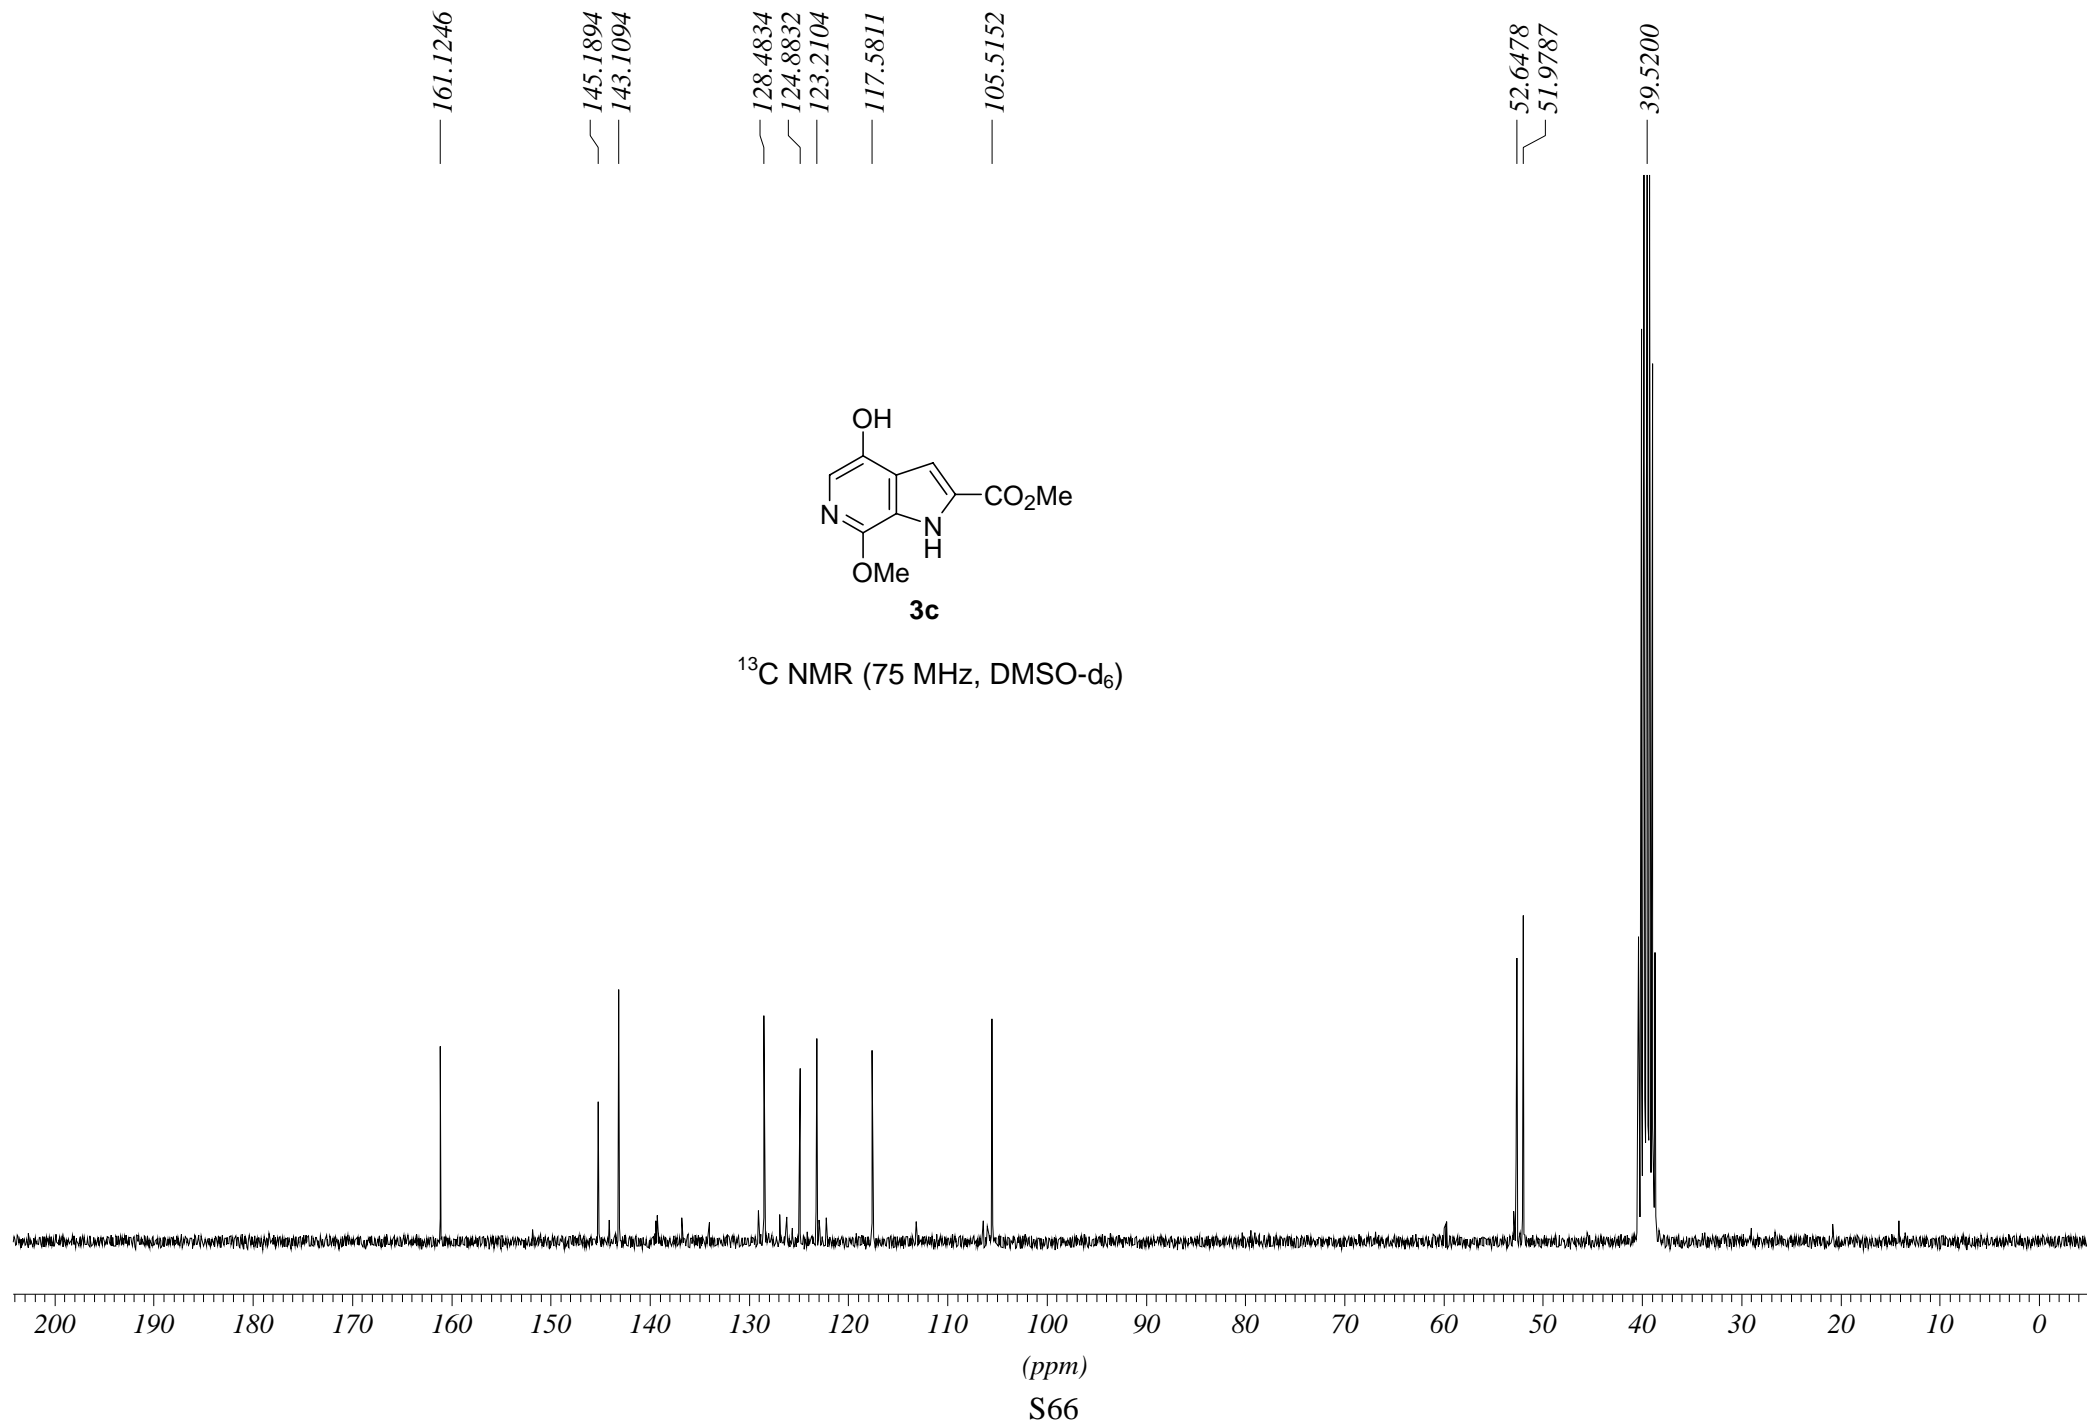

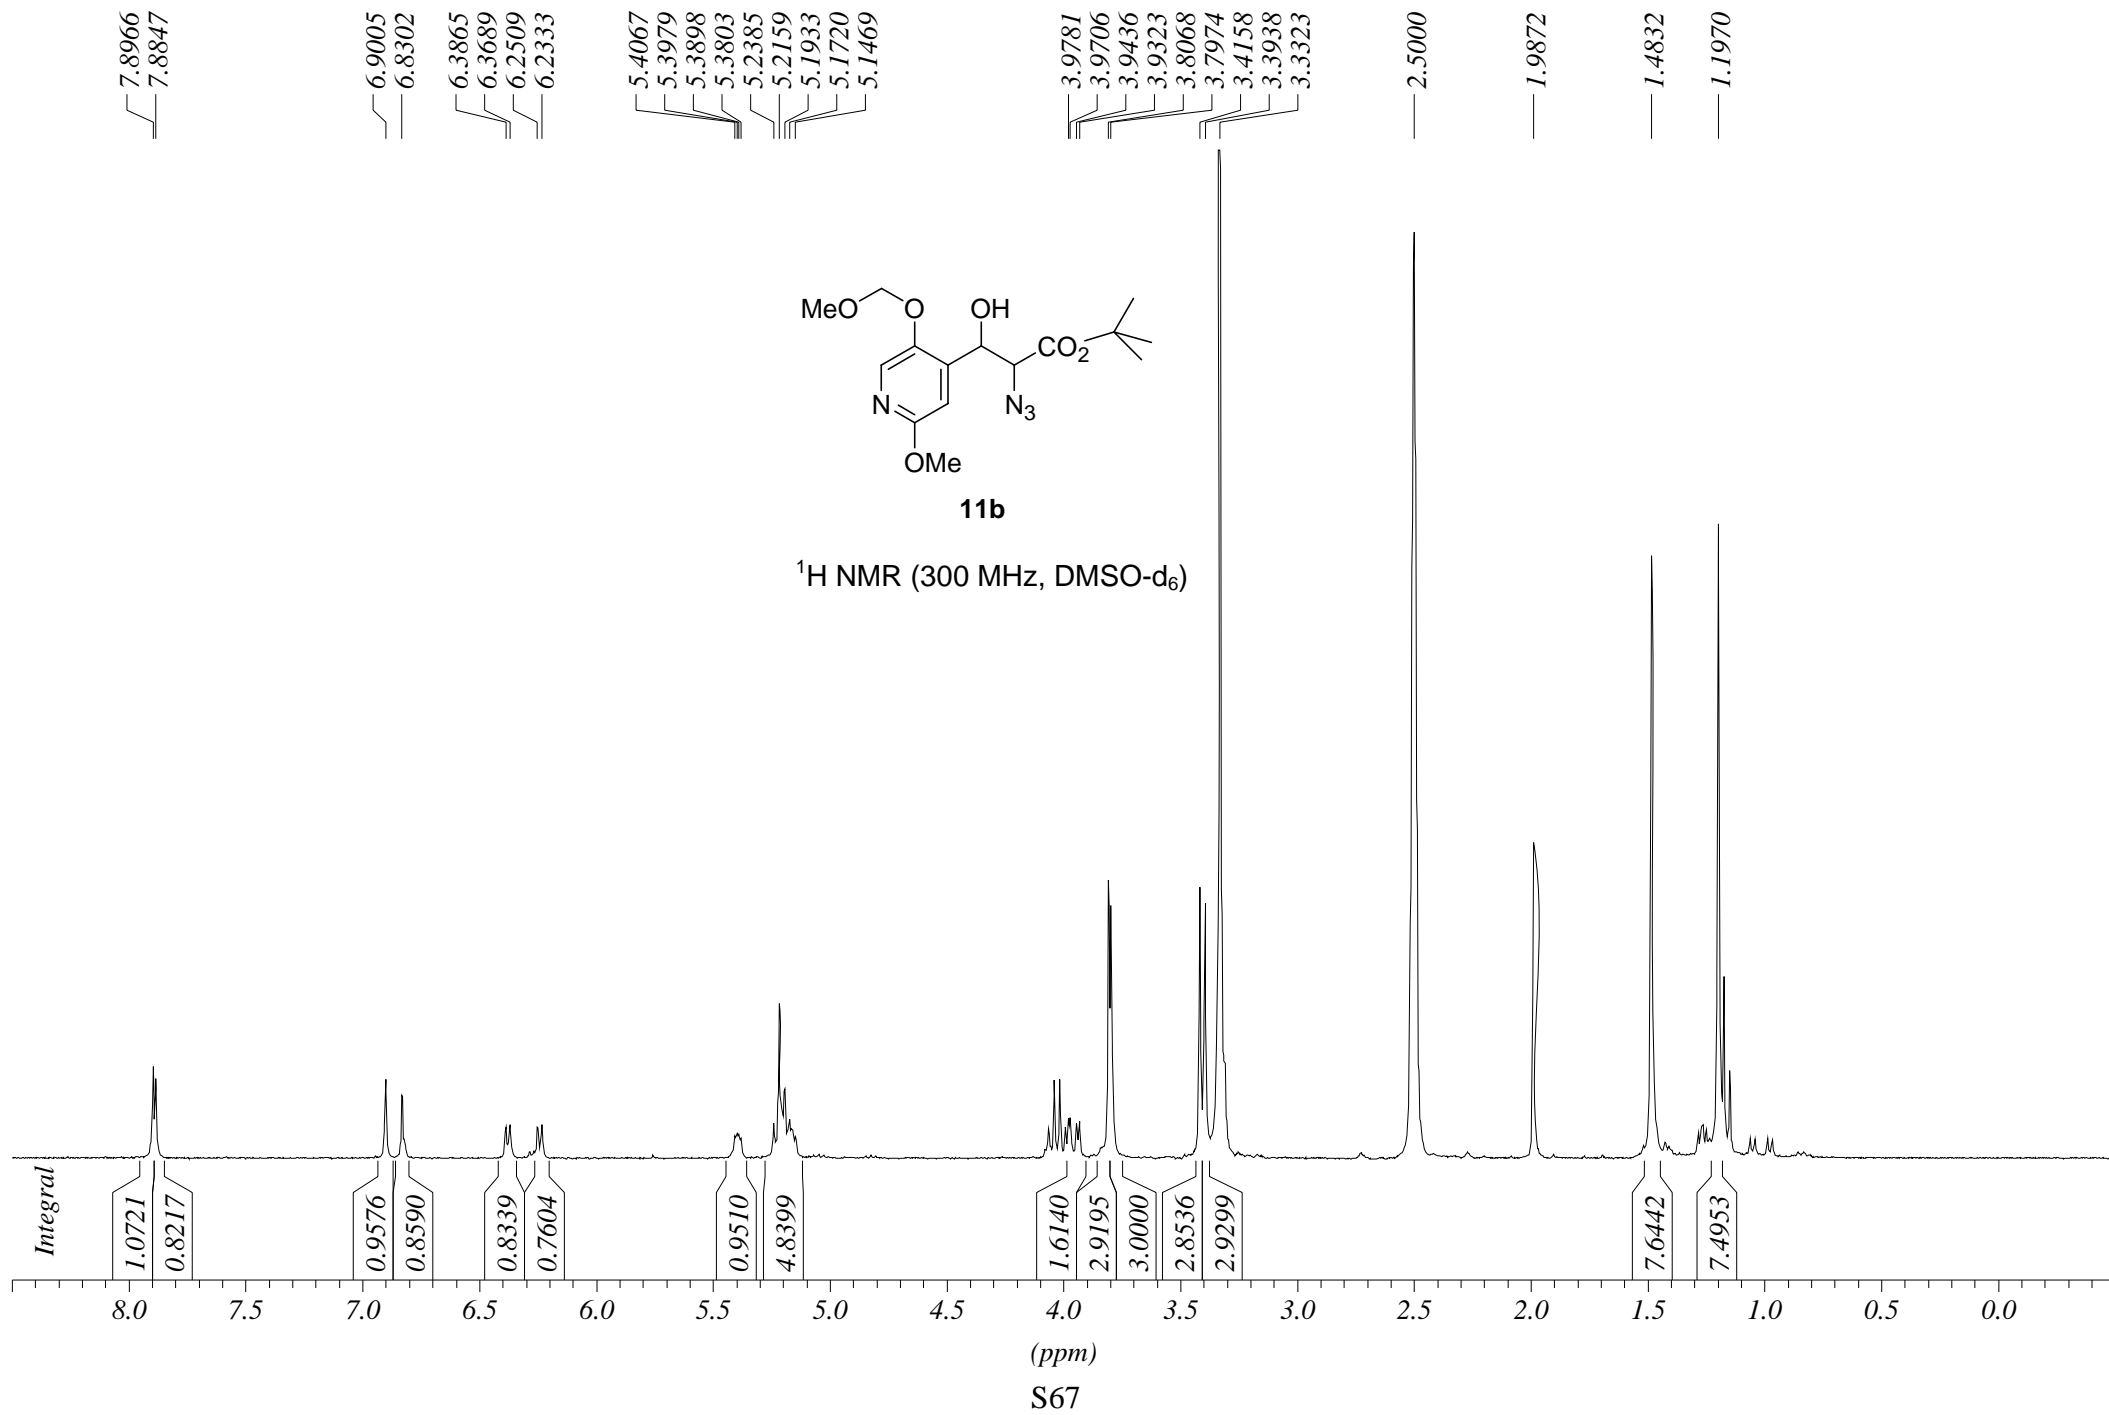

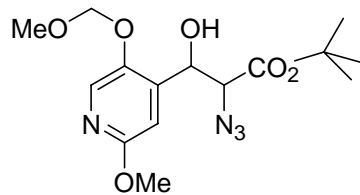

**11b**

<sup>13</sup>C NMR (75 MHz, DMSO-d<sub>6</sub>)  
(contaminated with *tert*-butyl azidoacetate)

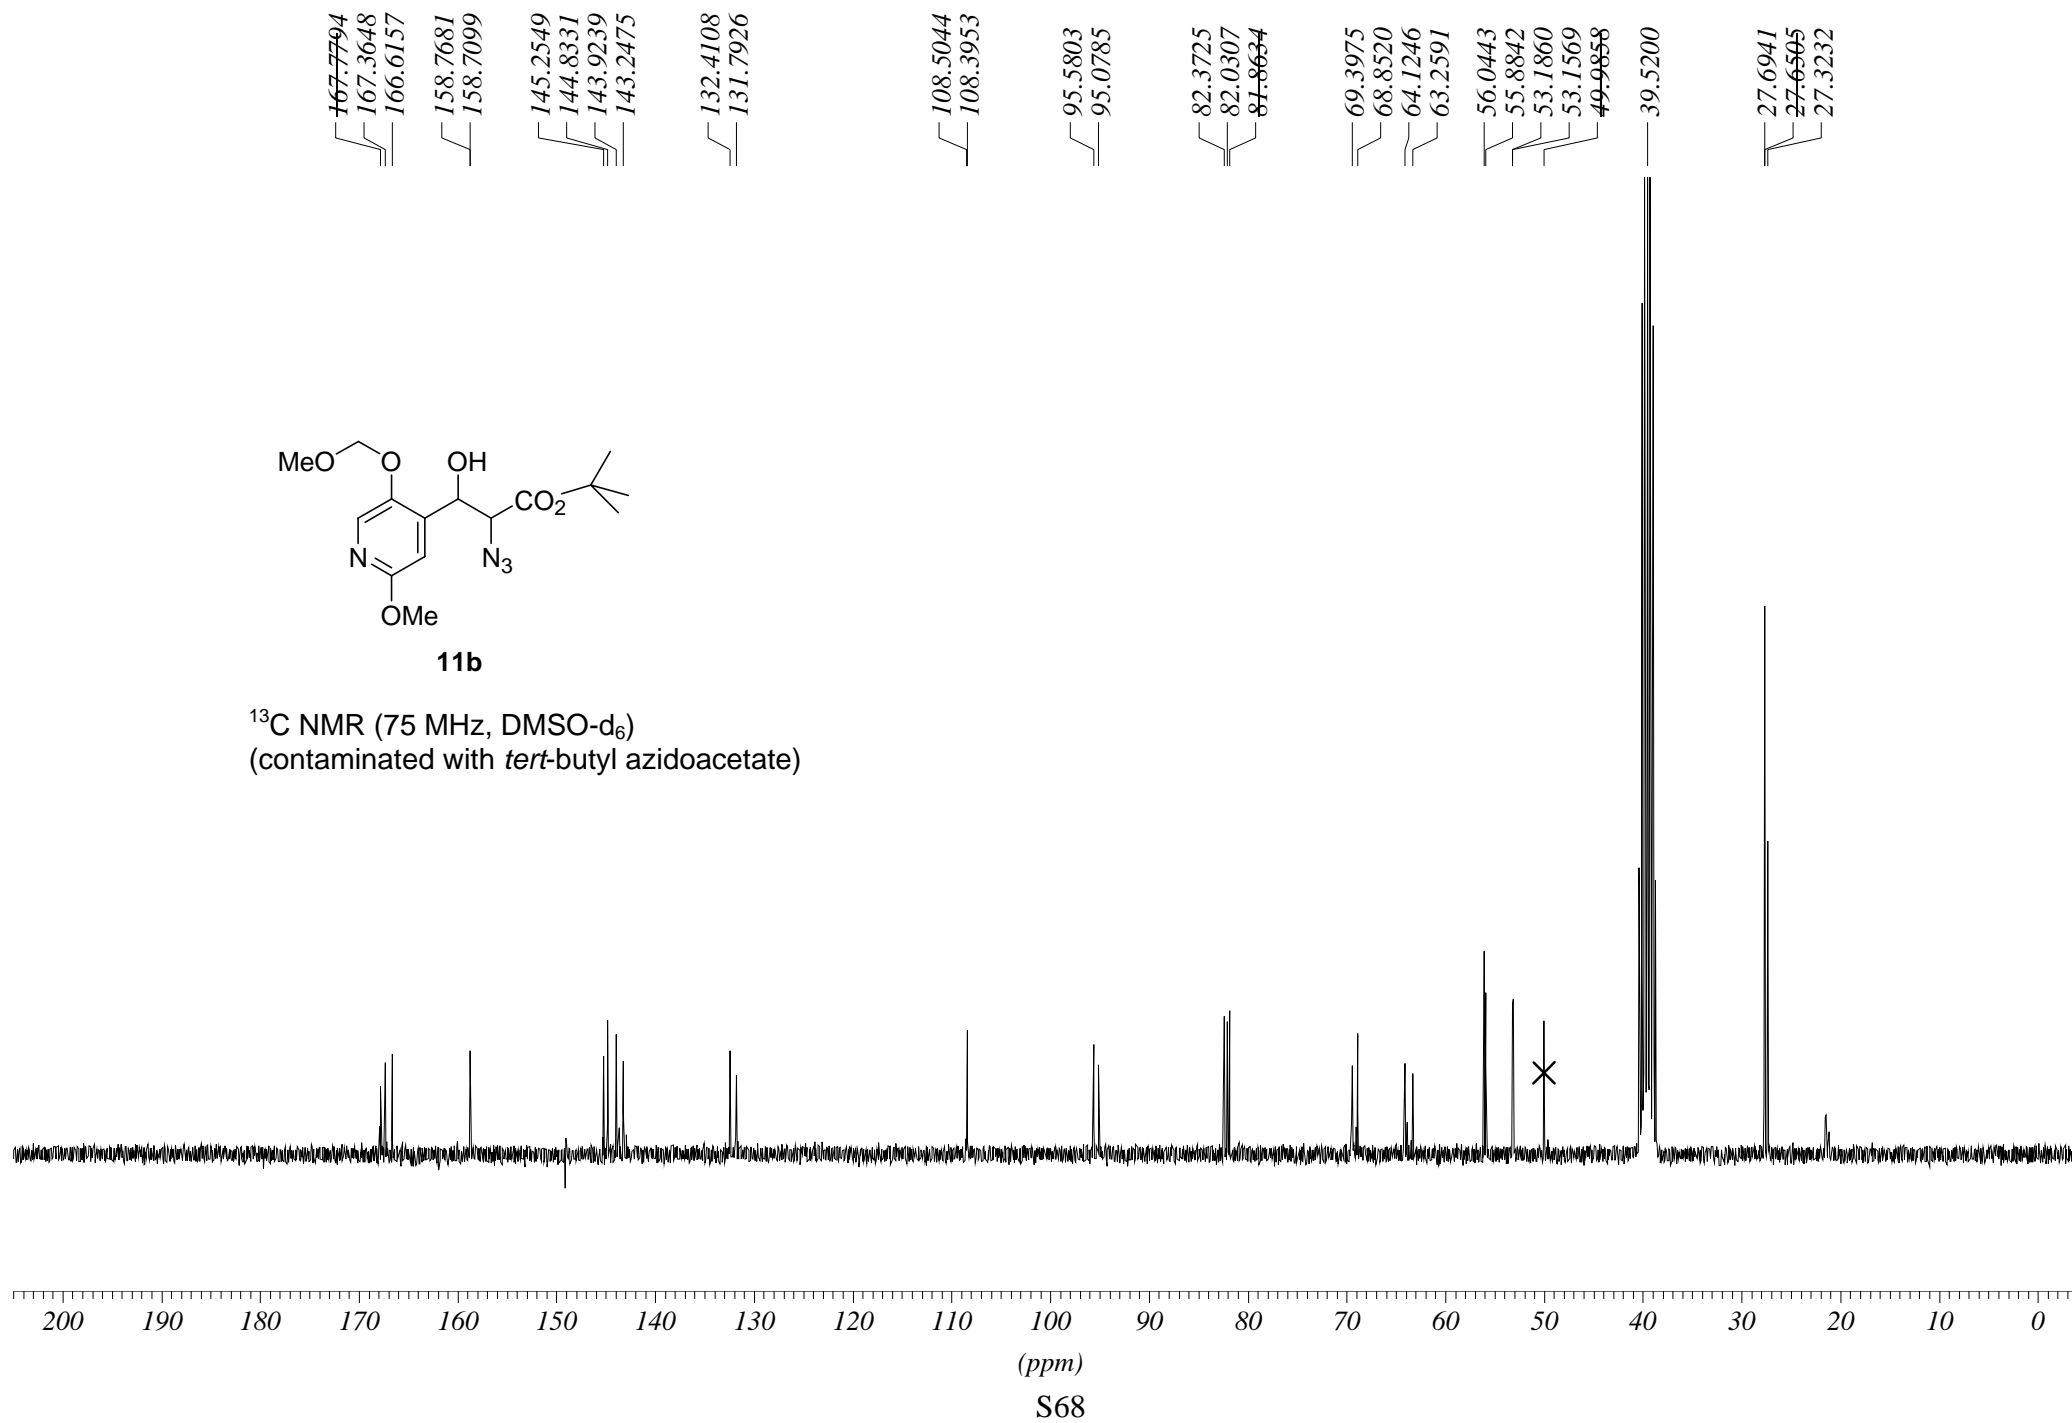

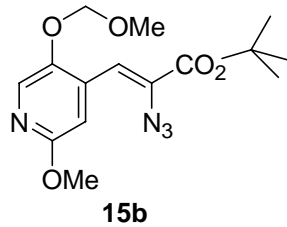<sup>1</sup>H NMR (300 MHz, DMSO-d<sub>6</sub>)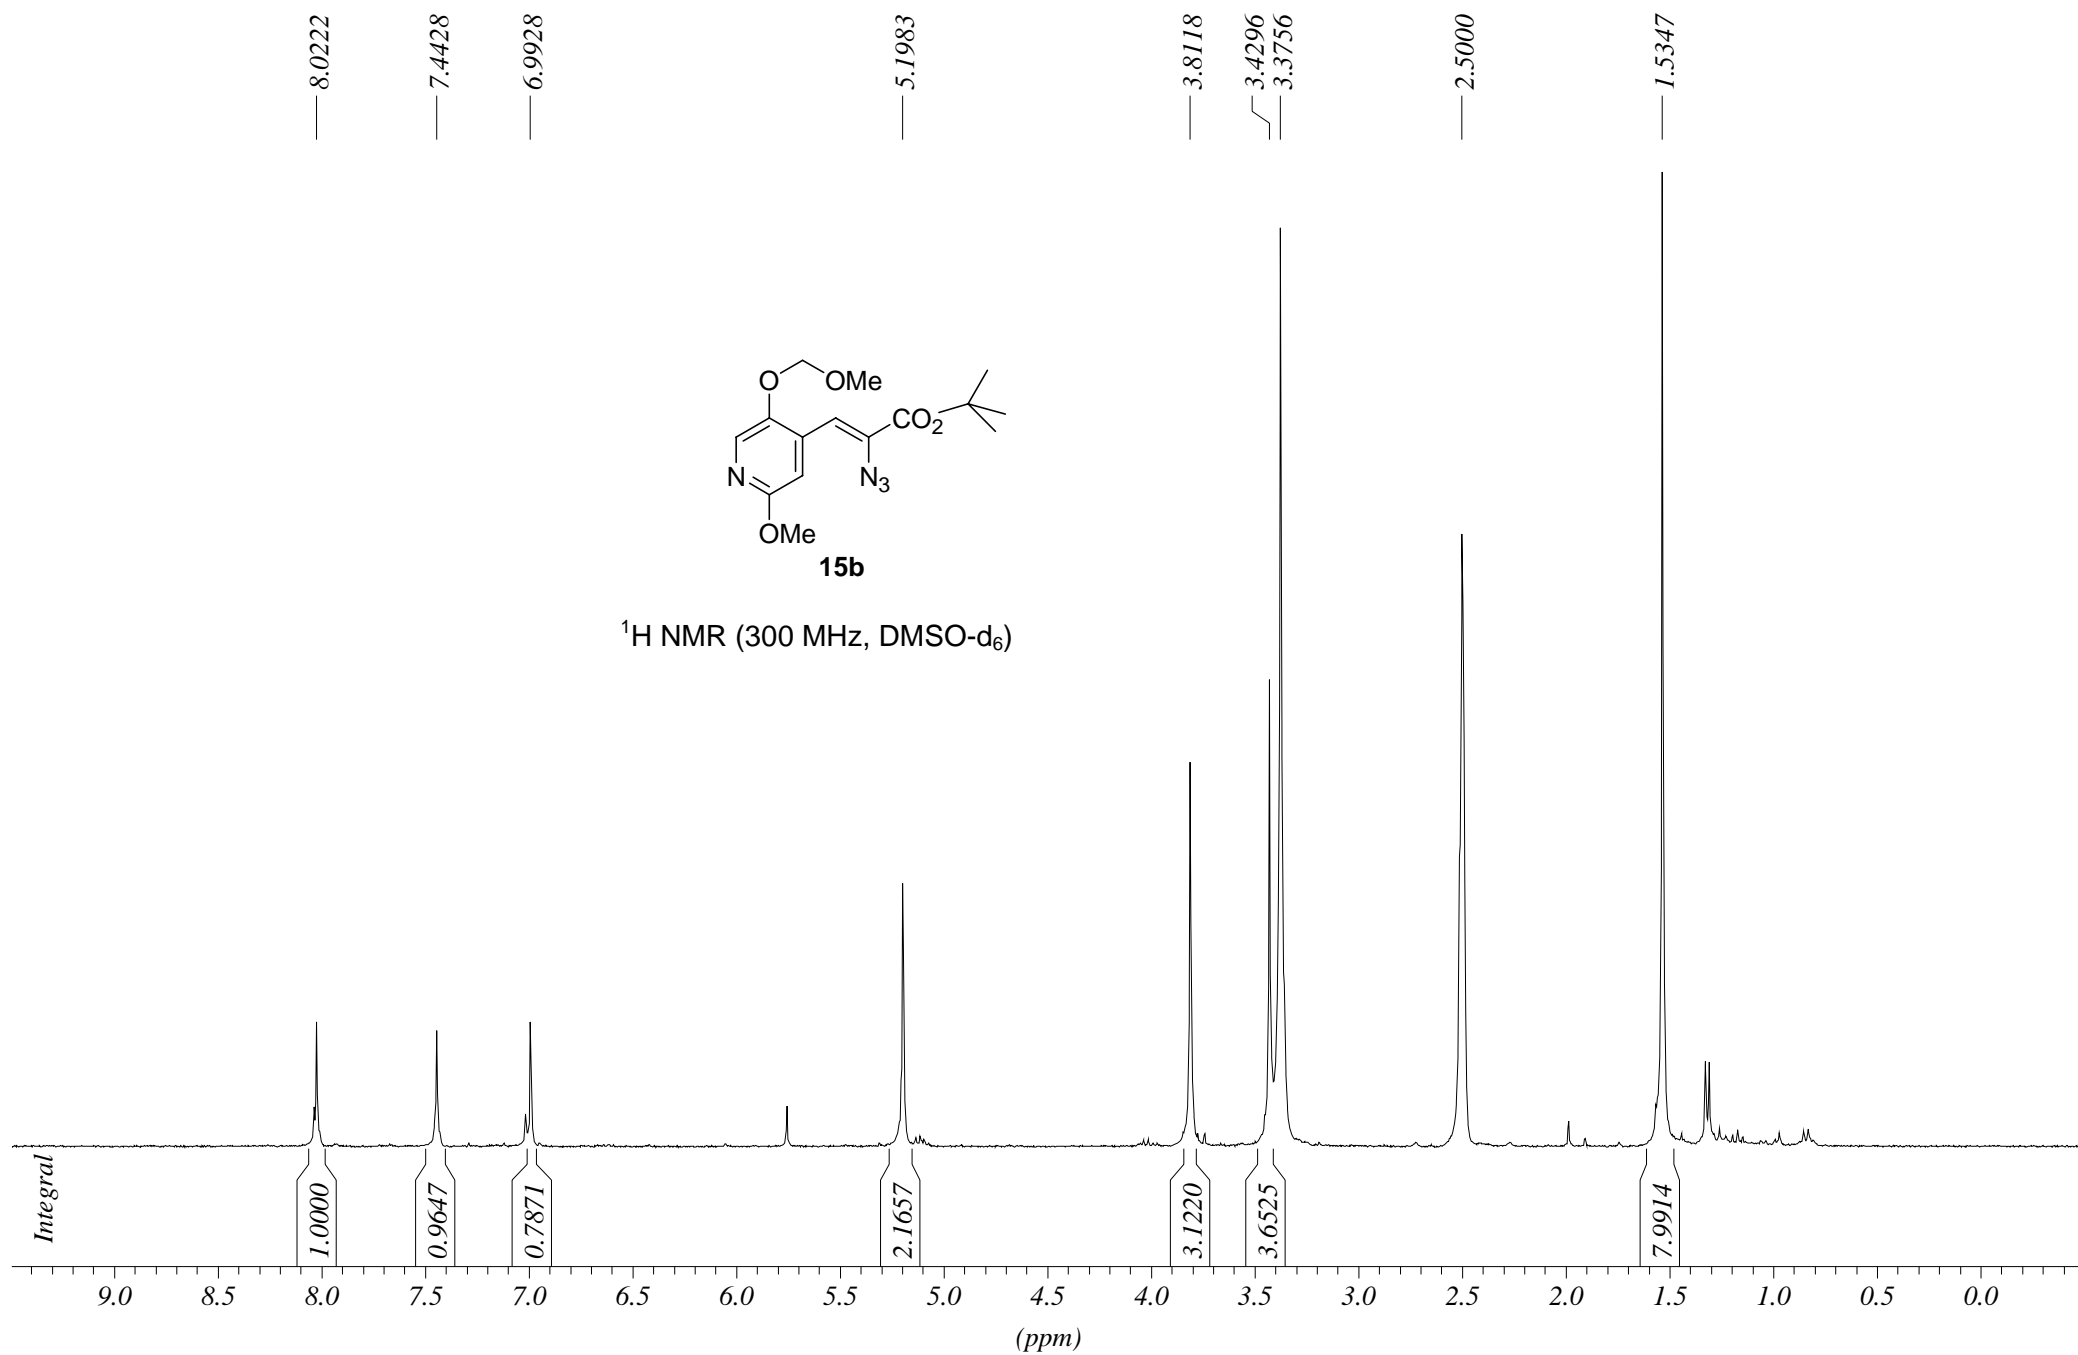

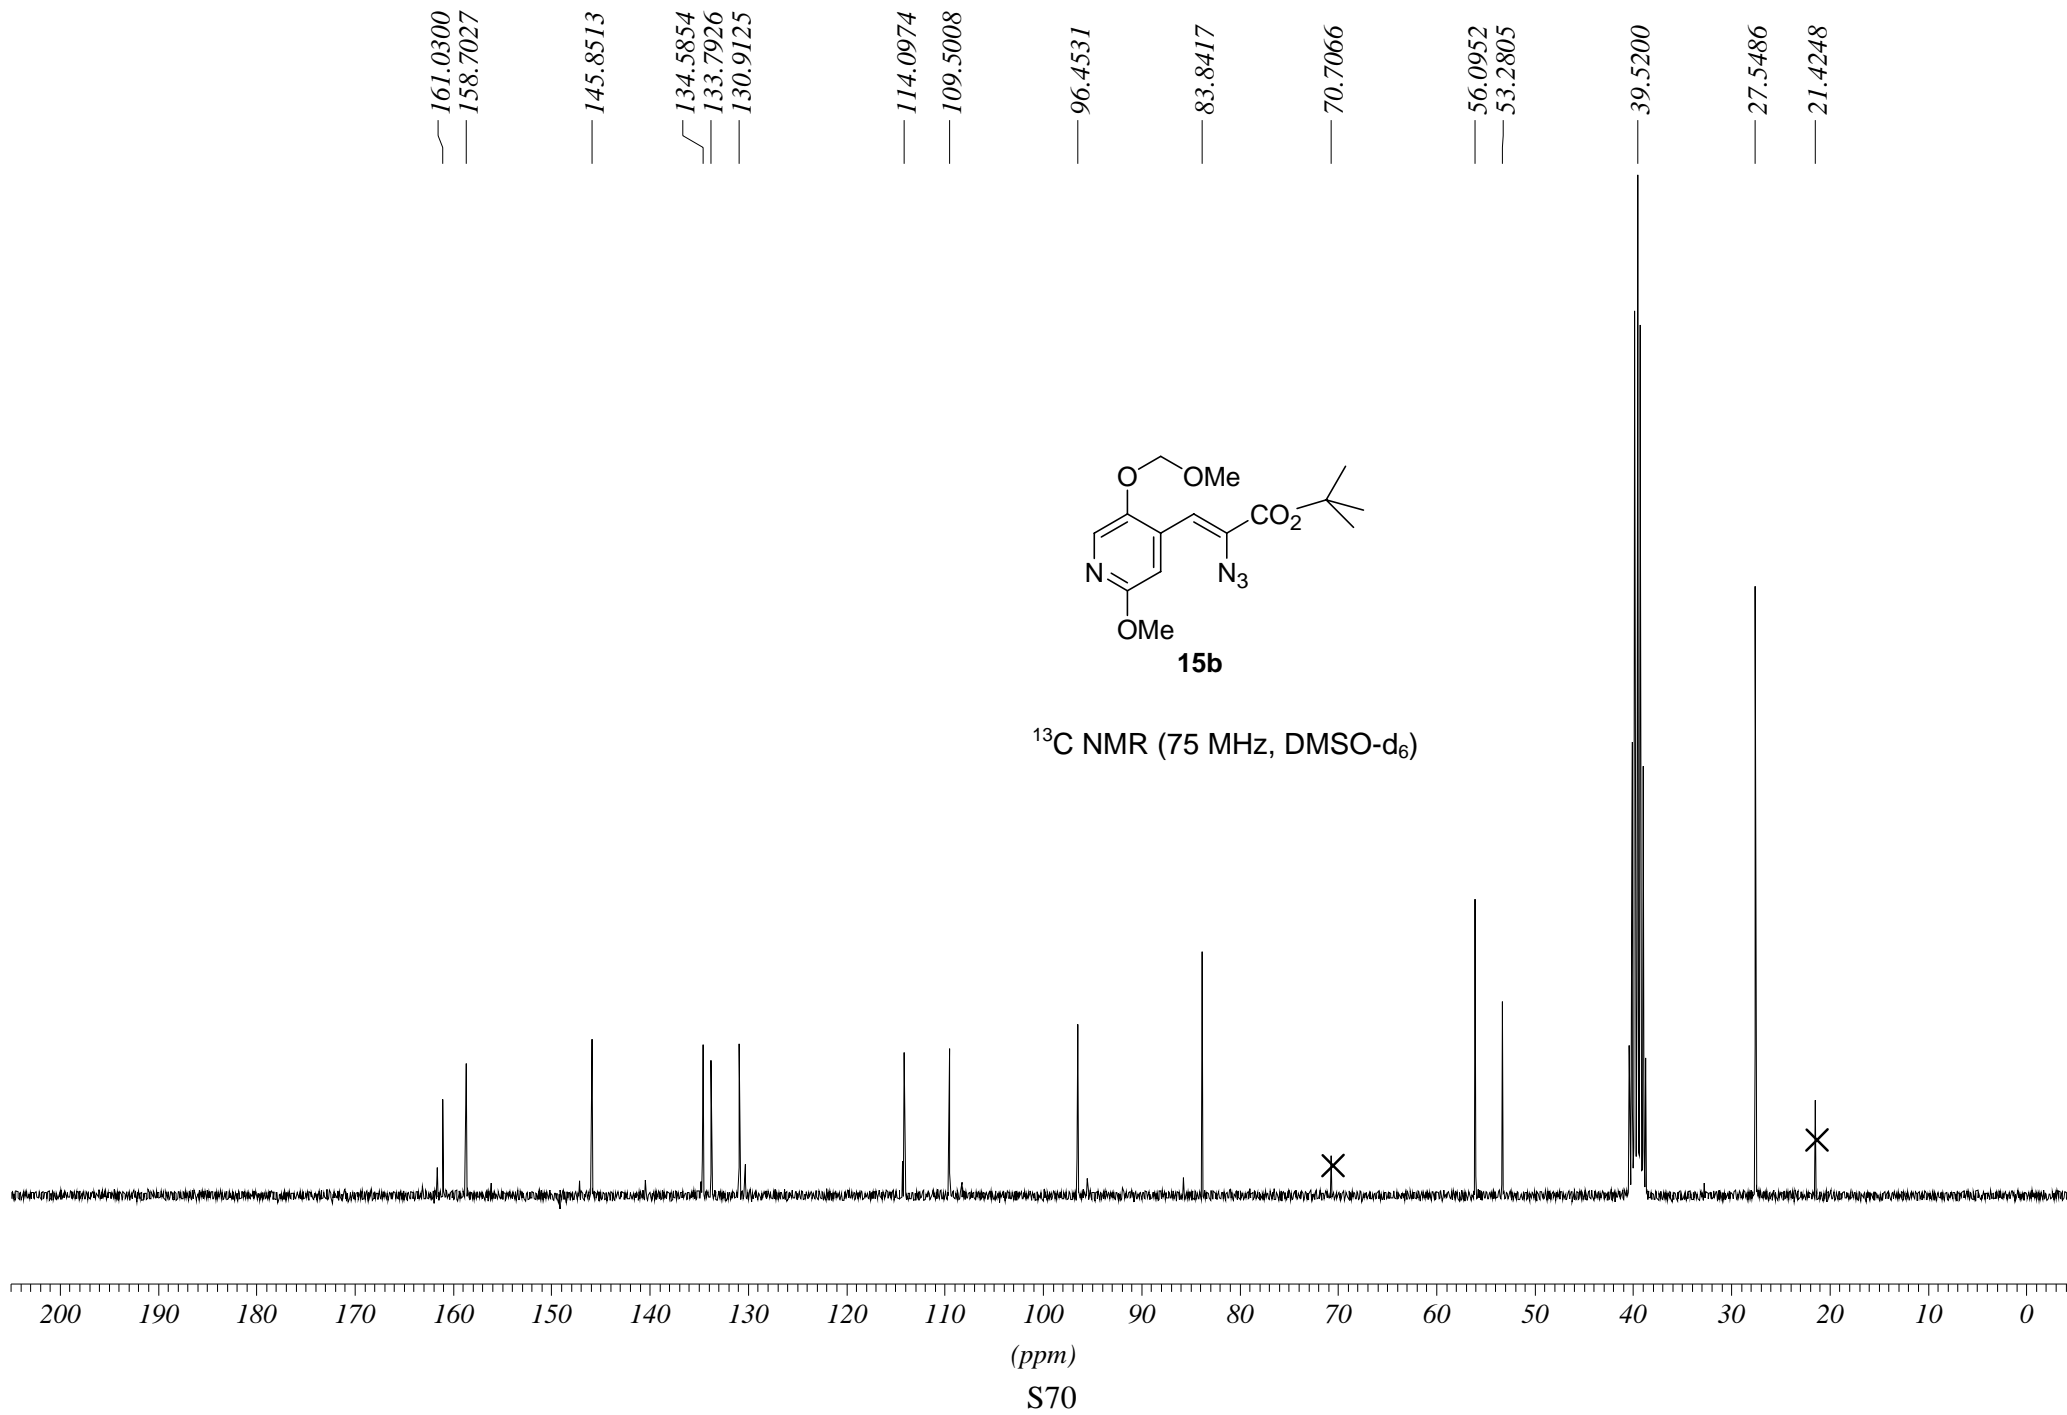

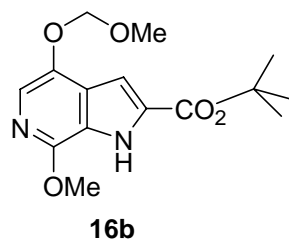

<sup>1</sup>H NMR (300 MHz, DMSO-d<sub>6</sub>)

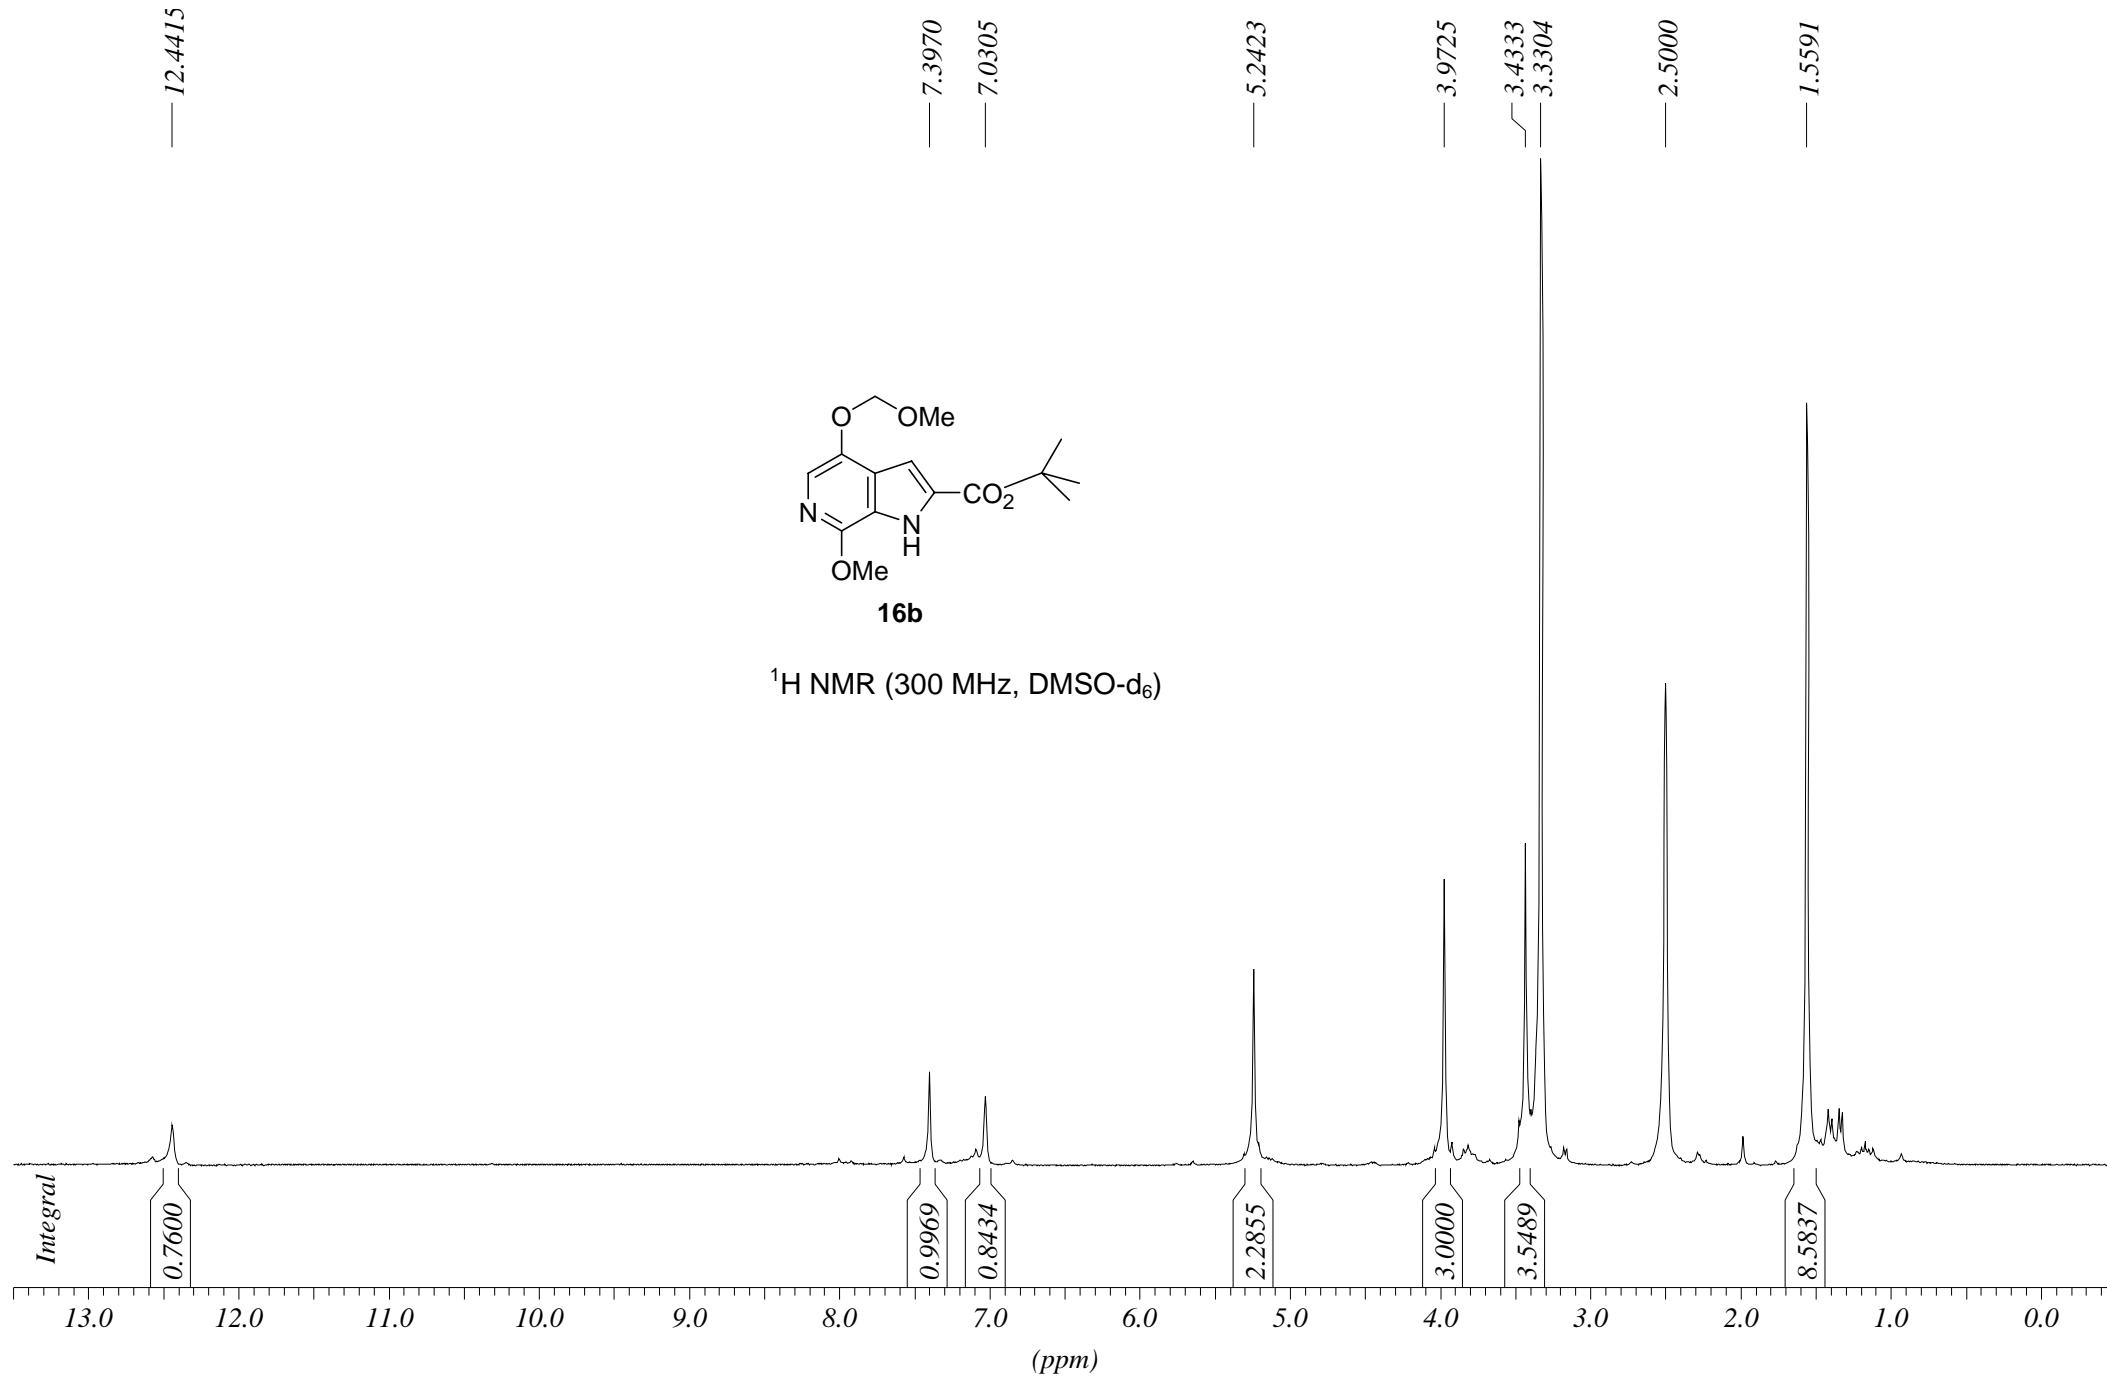

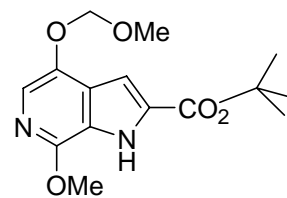

**16b**

$^{13}\text{C}$  NMR (75 MHz, DMSO- $\text{d}_6$ )

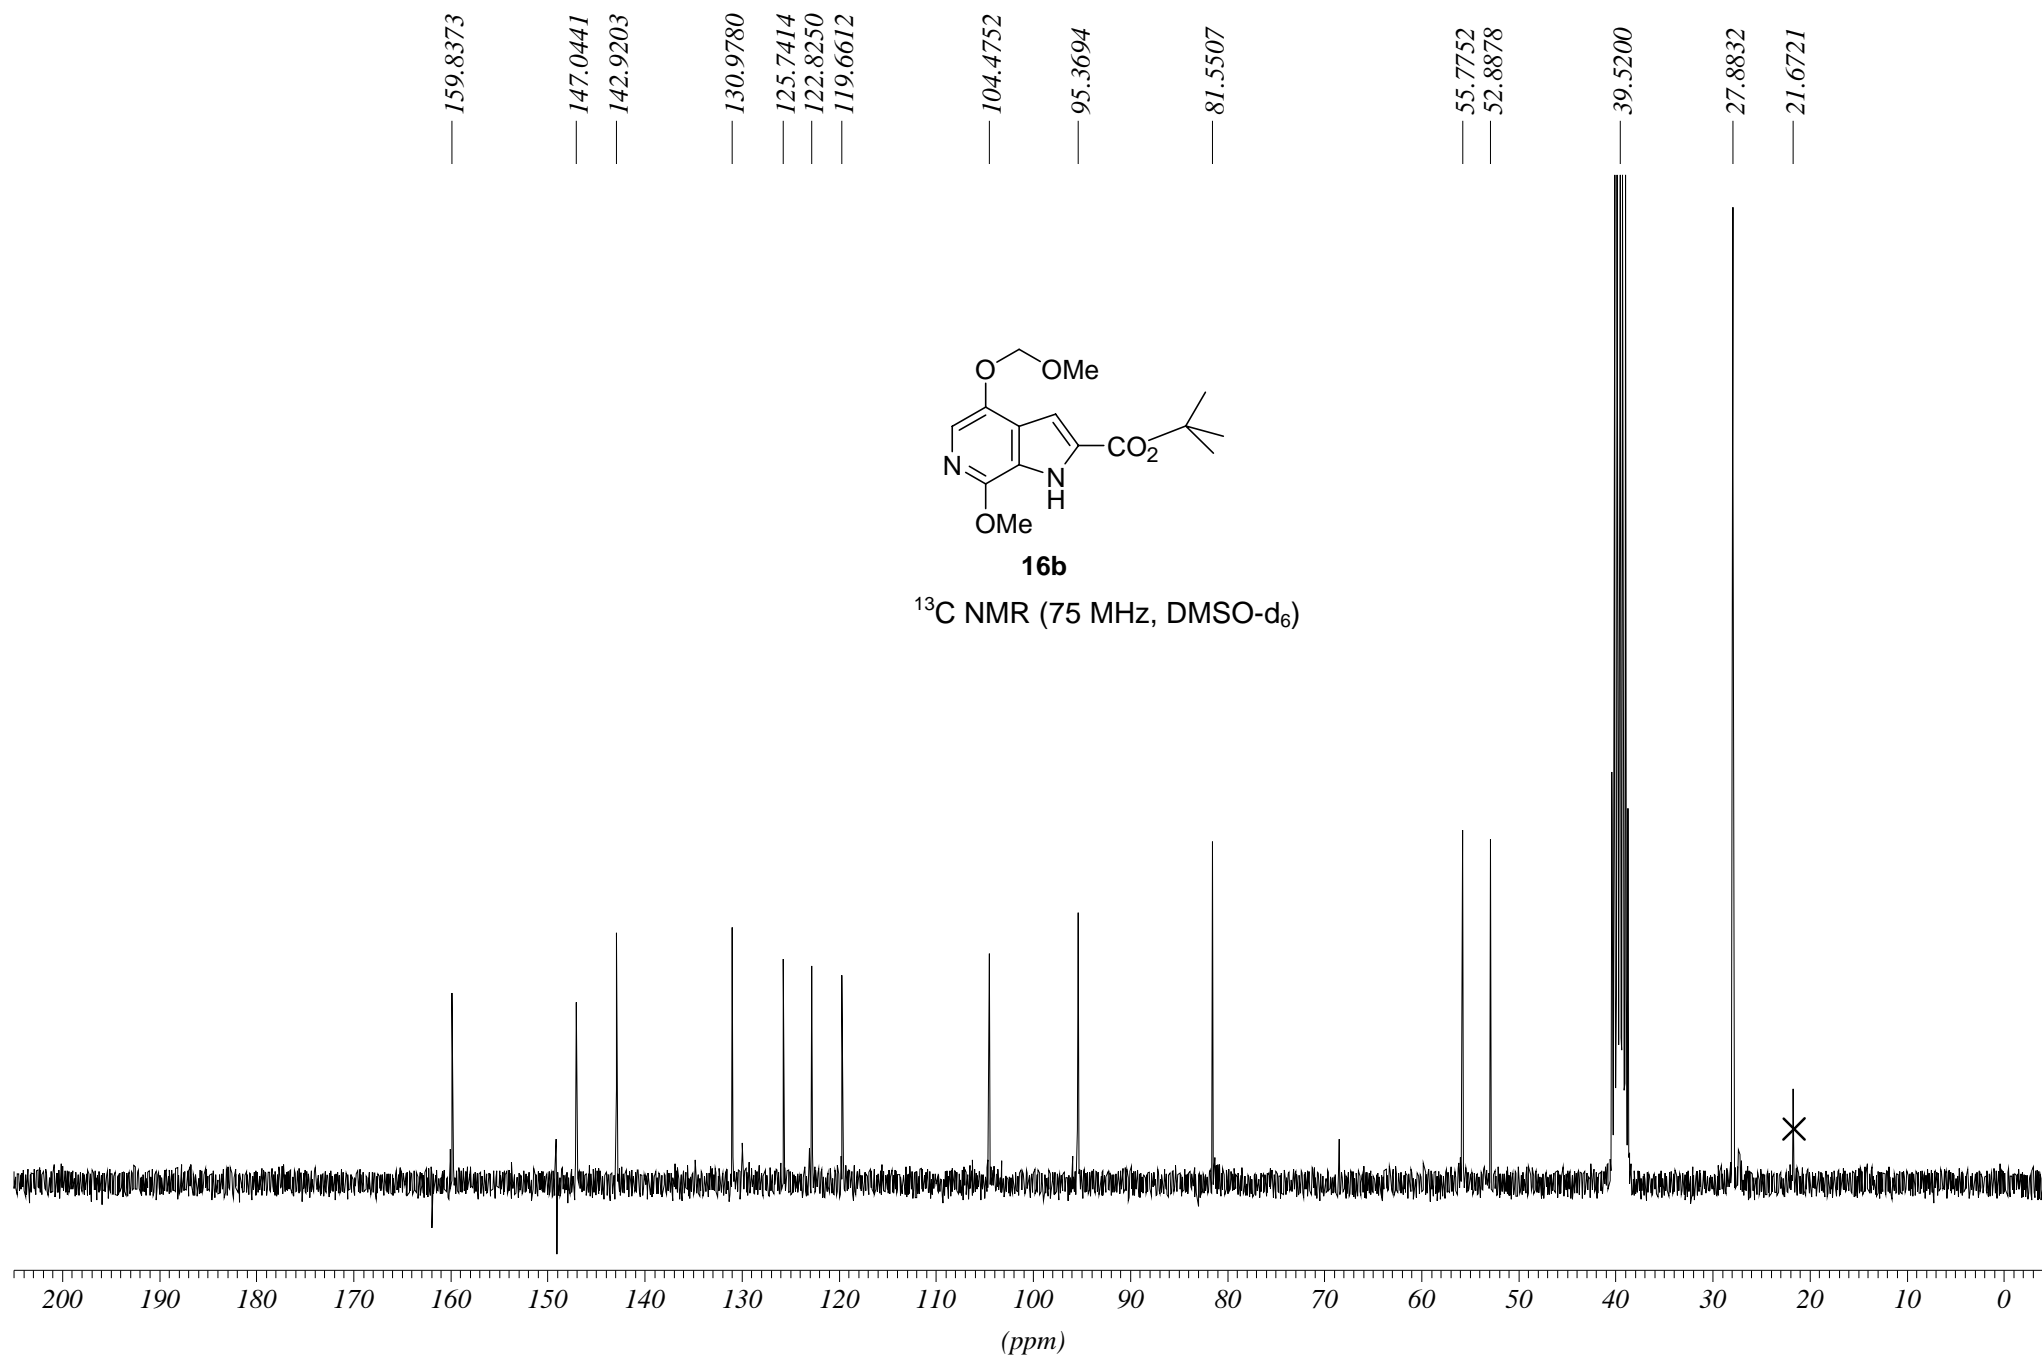



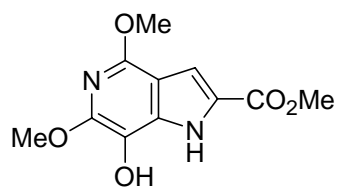

**17a**

$^1\text{H}$  NMR (300 MHz, DMSO- $\text{d}_6$ )

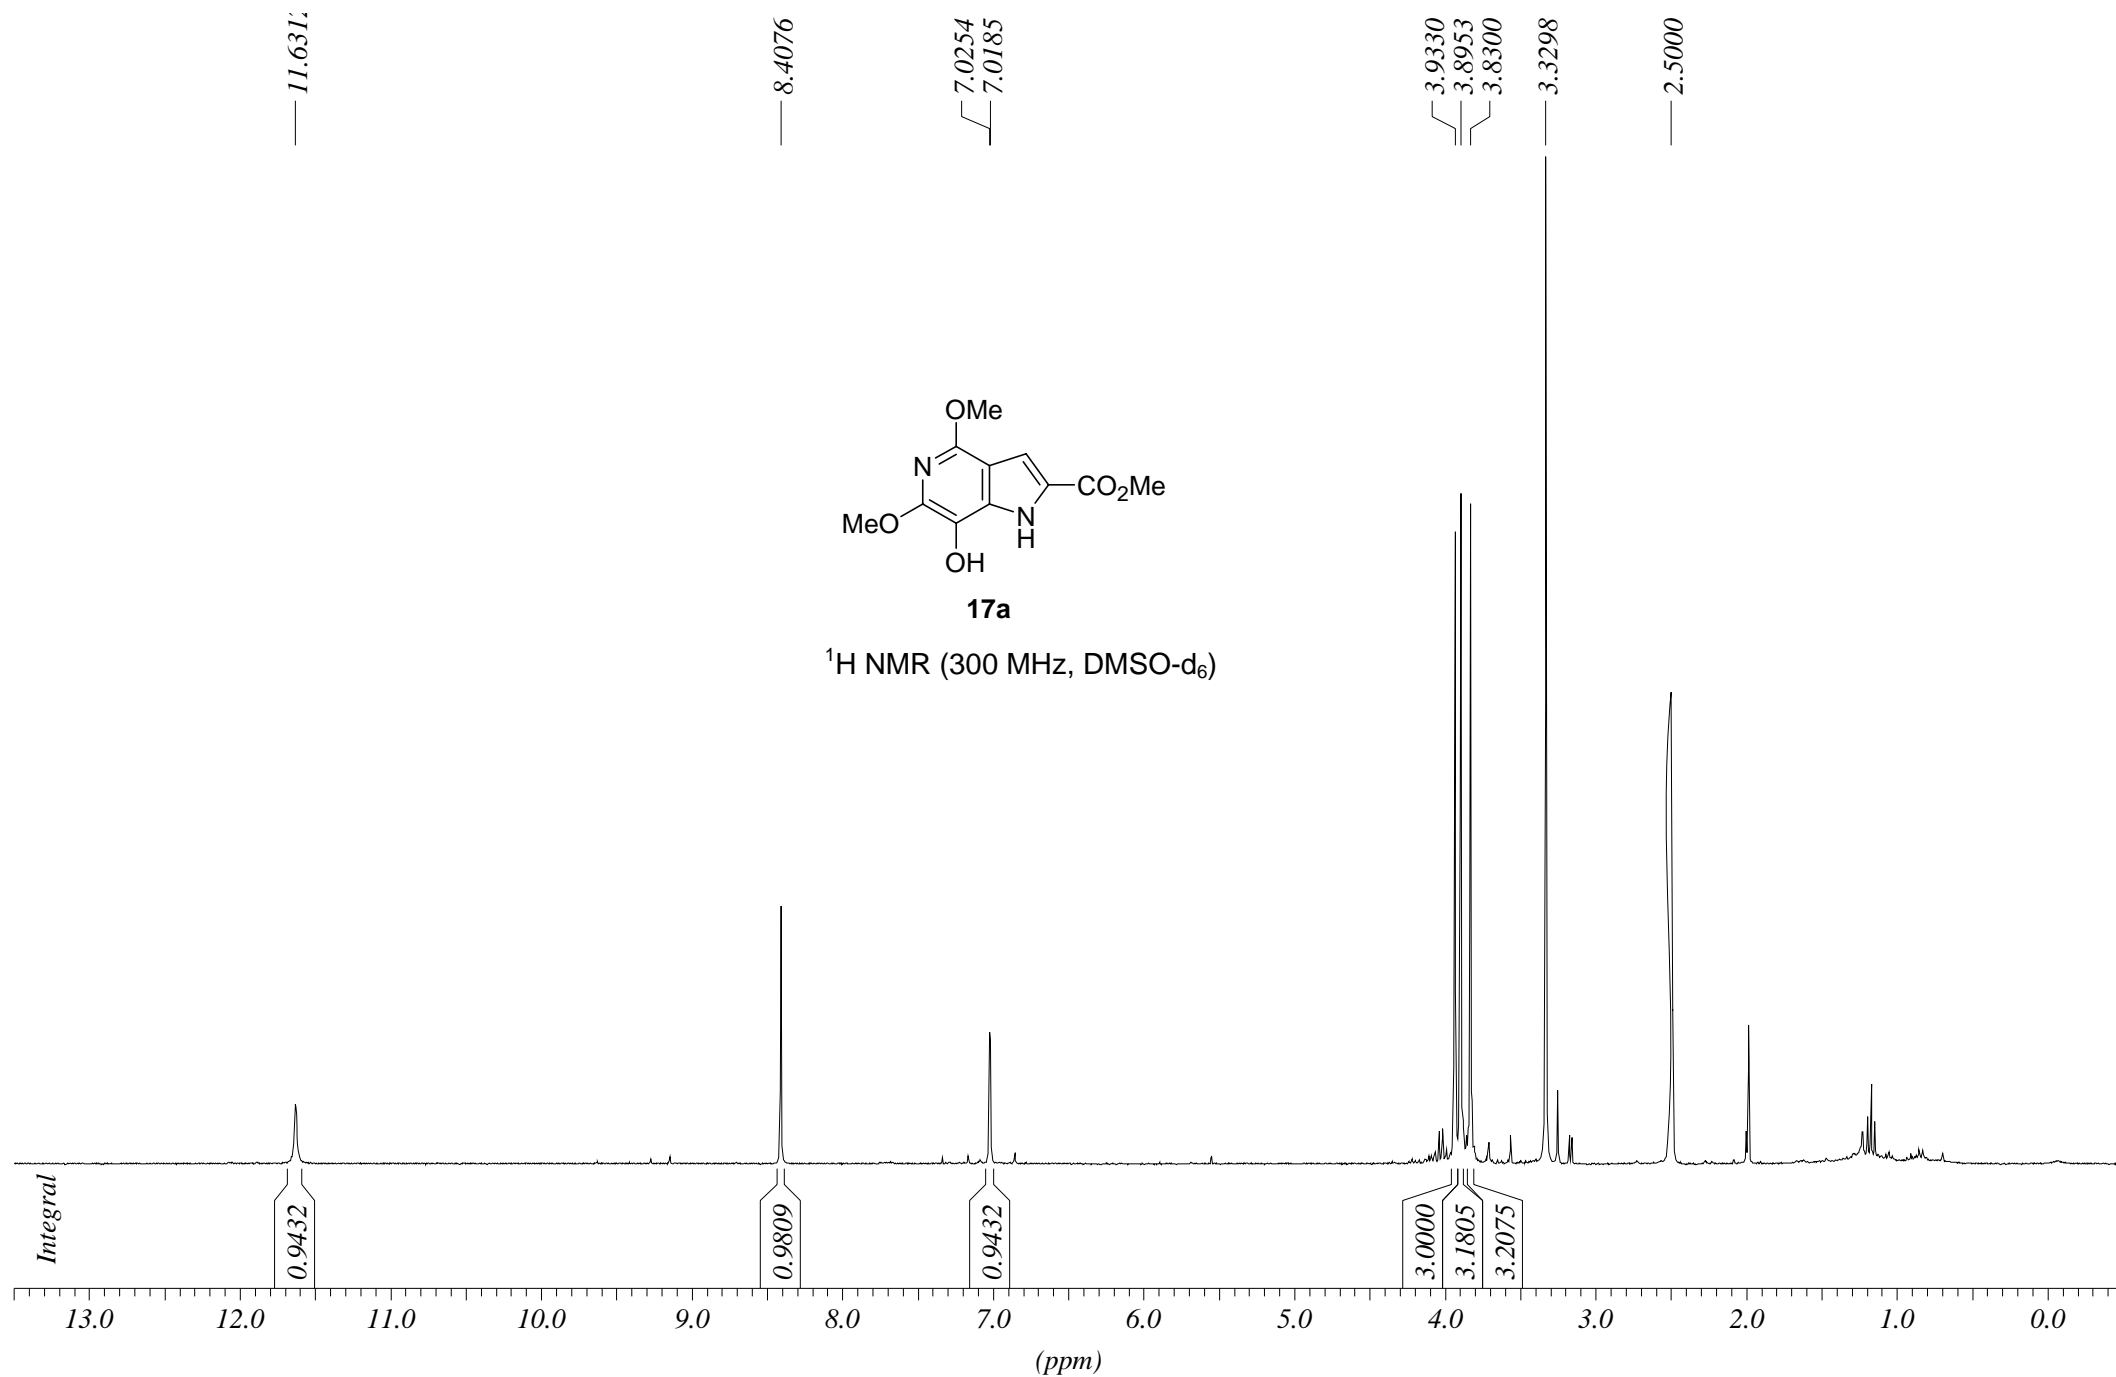

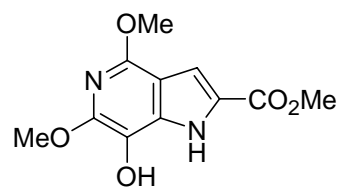

**17a**

$^{13}\text{C}$  NMR (75 MHz, DMSO- $\text{d}_6$ )

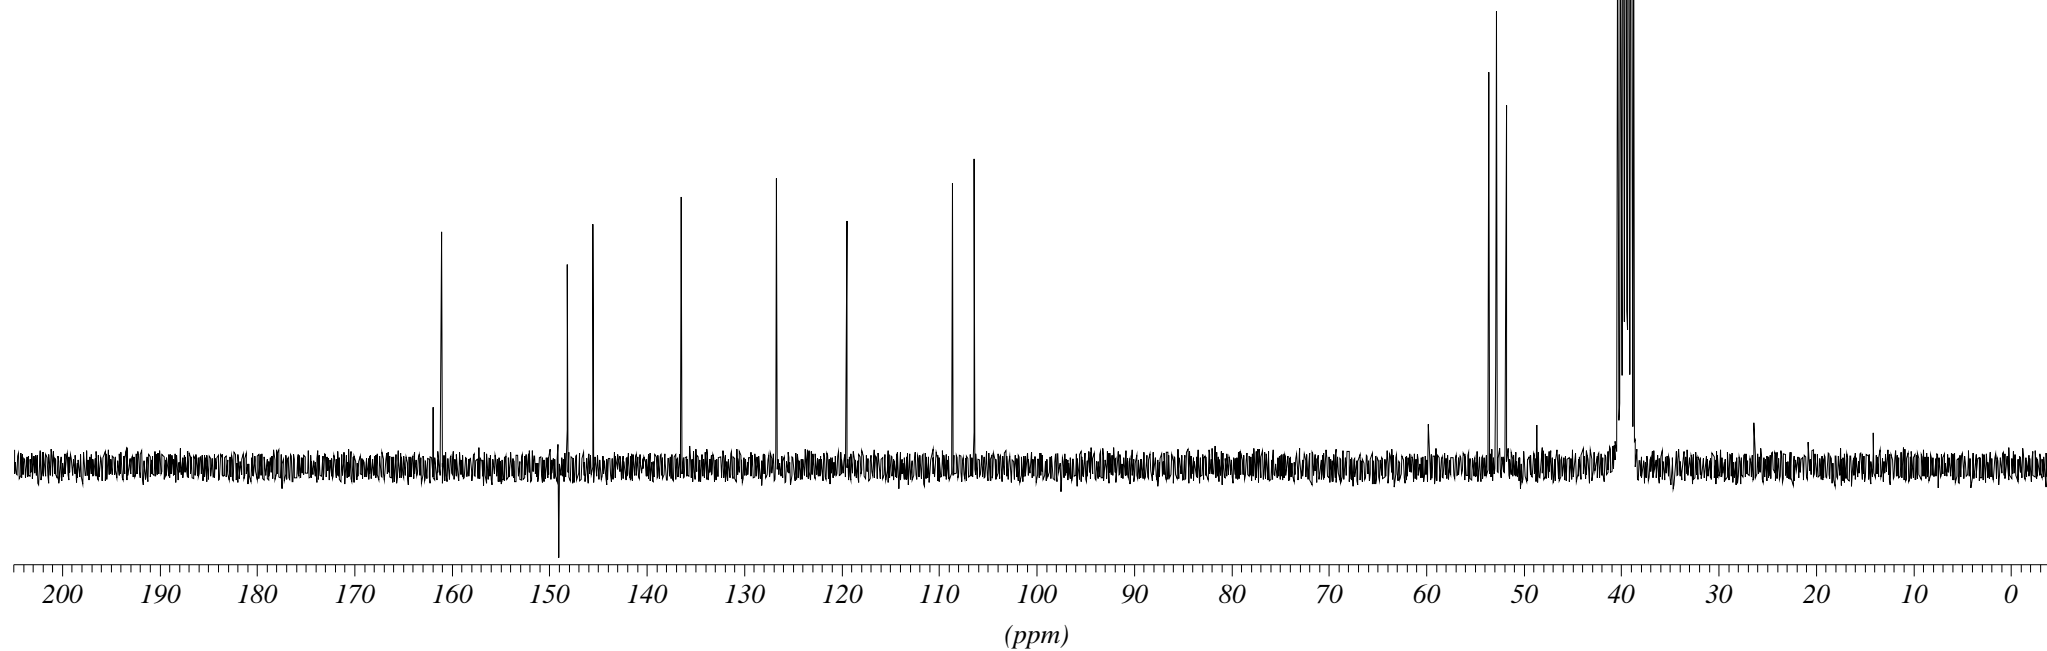

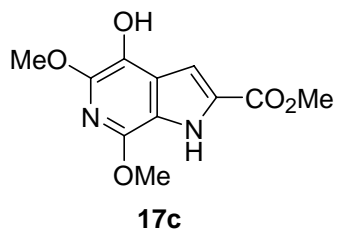

<sup>1</sup>H NMR (300 MHz, DMSO-d<sub>6</sub>)

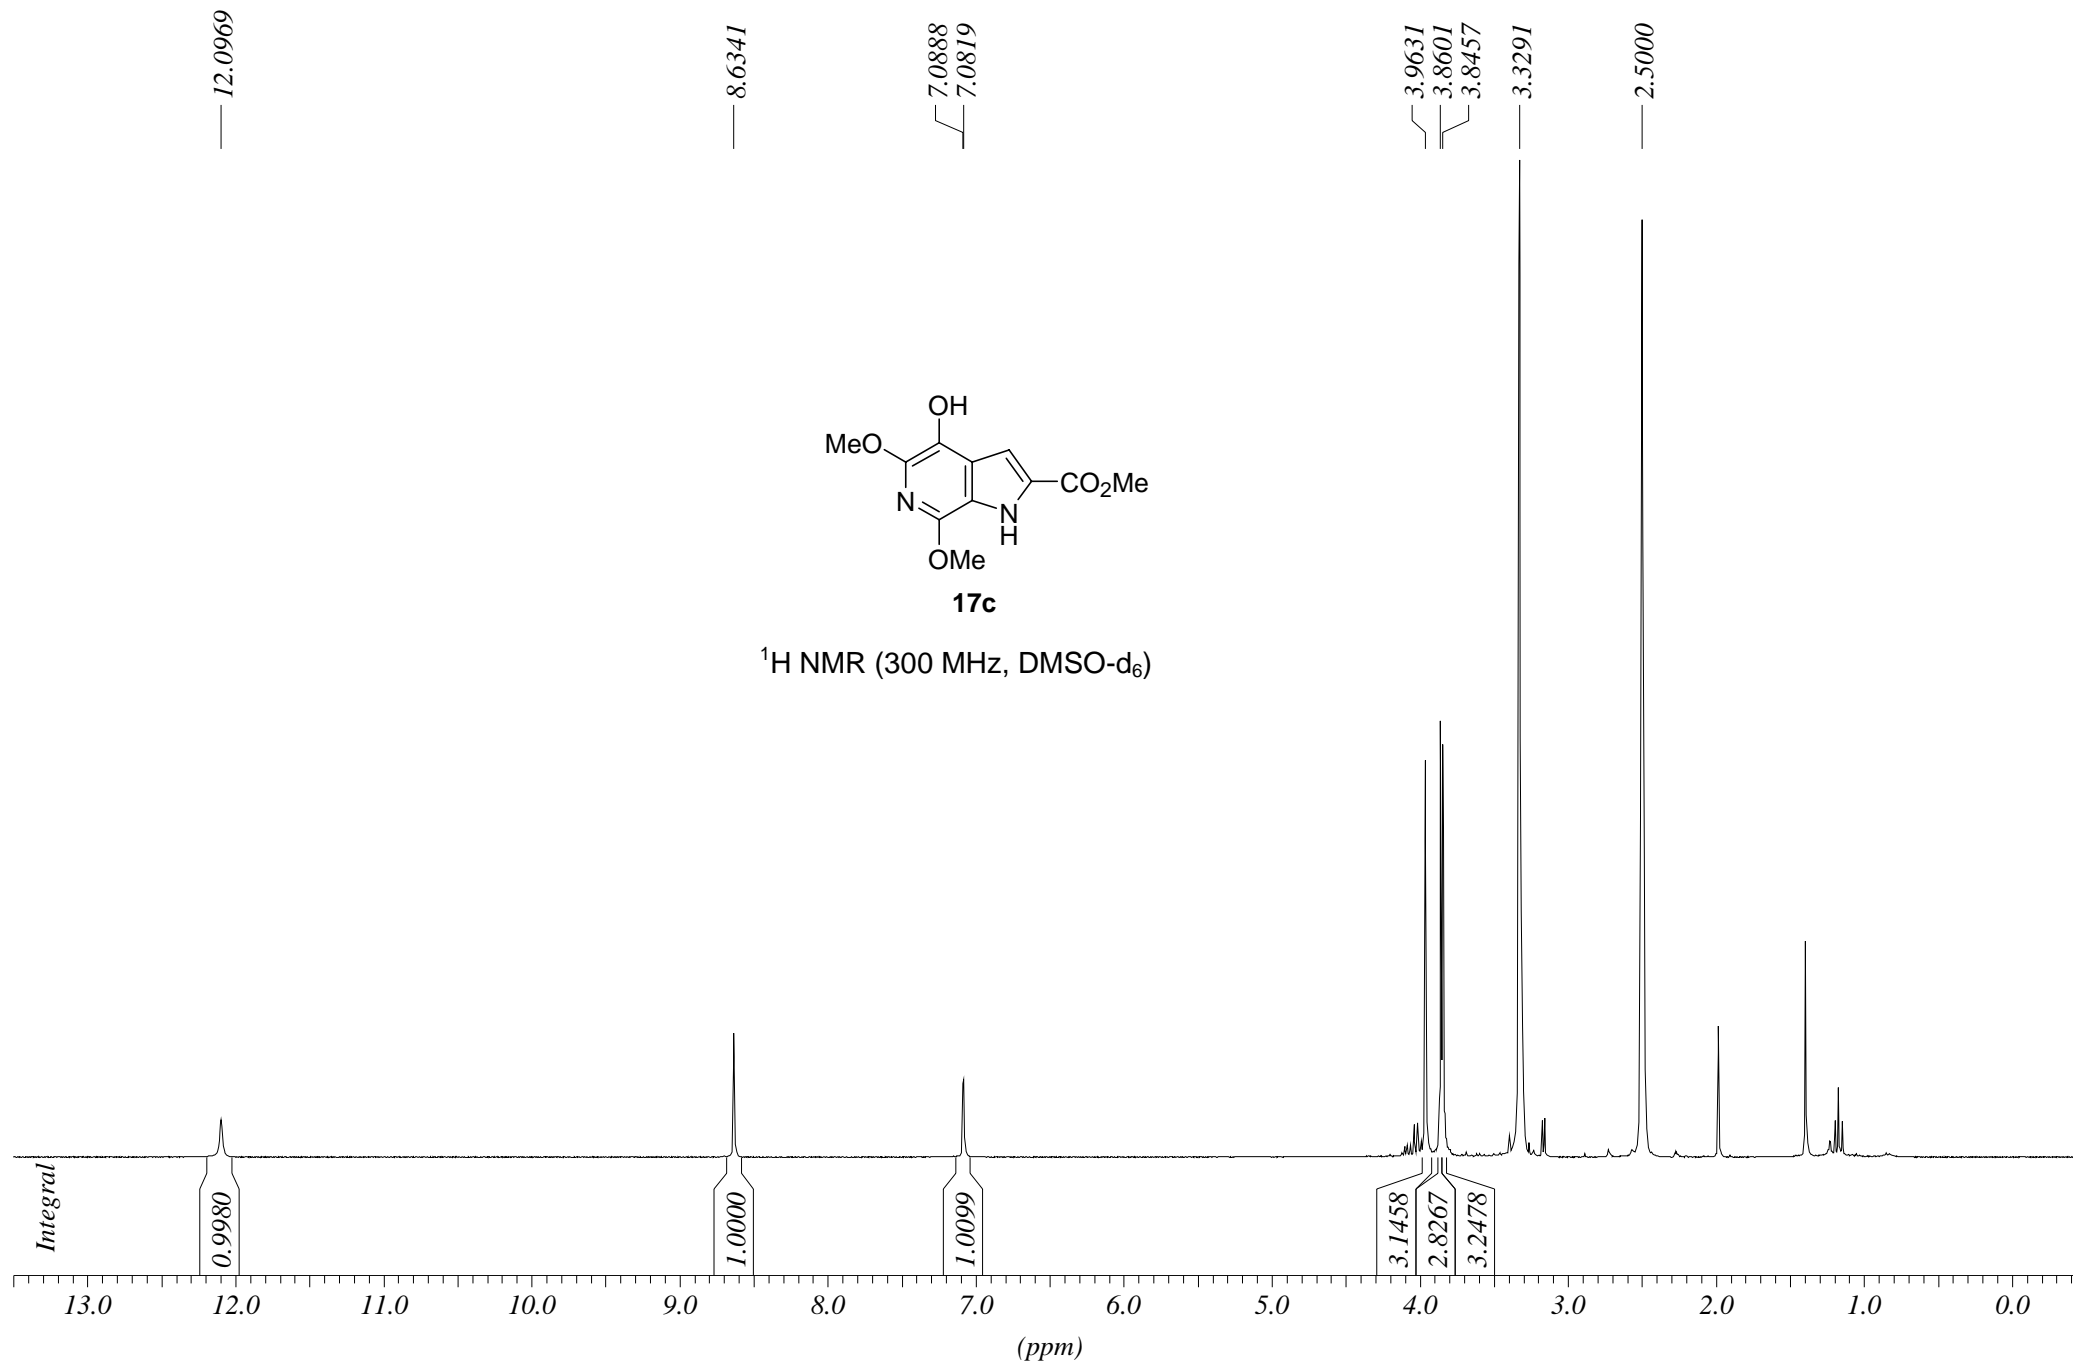

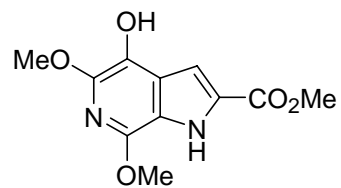

**17c**

$^{13}\text{C}$  NMR (75 MHz, DMSO- $\text{d}_6$ )

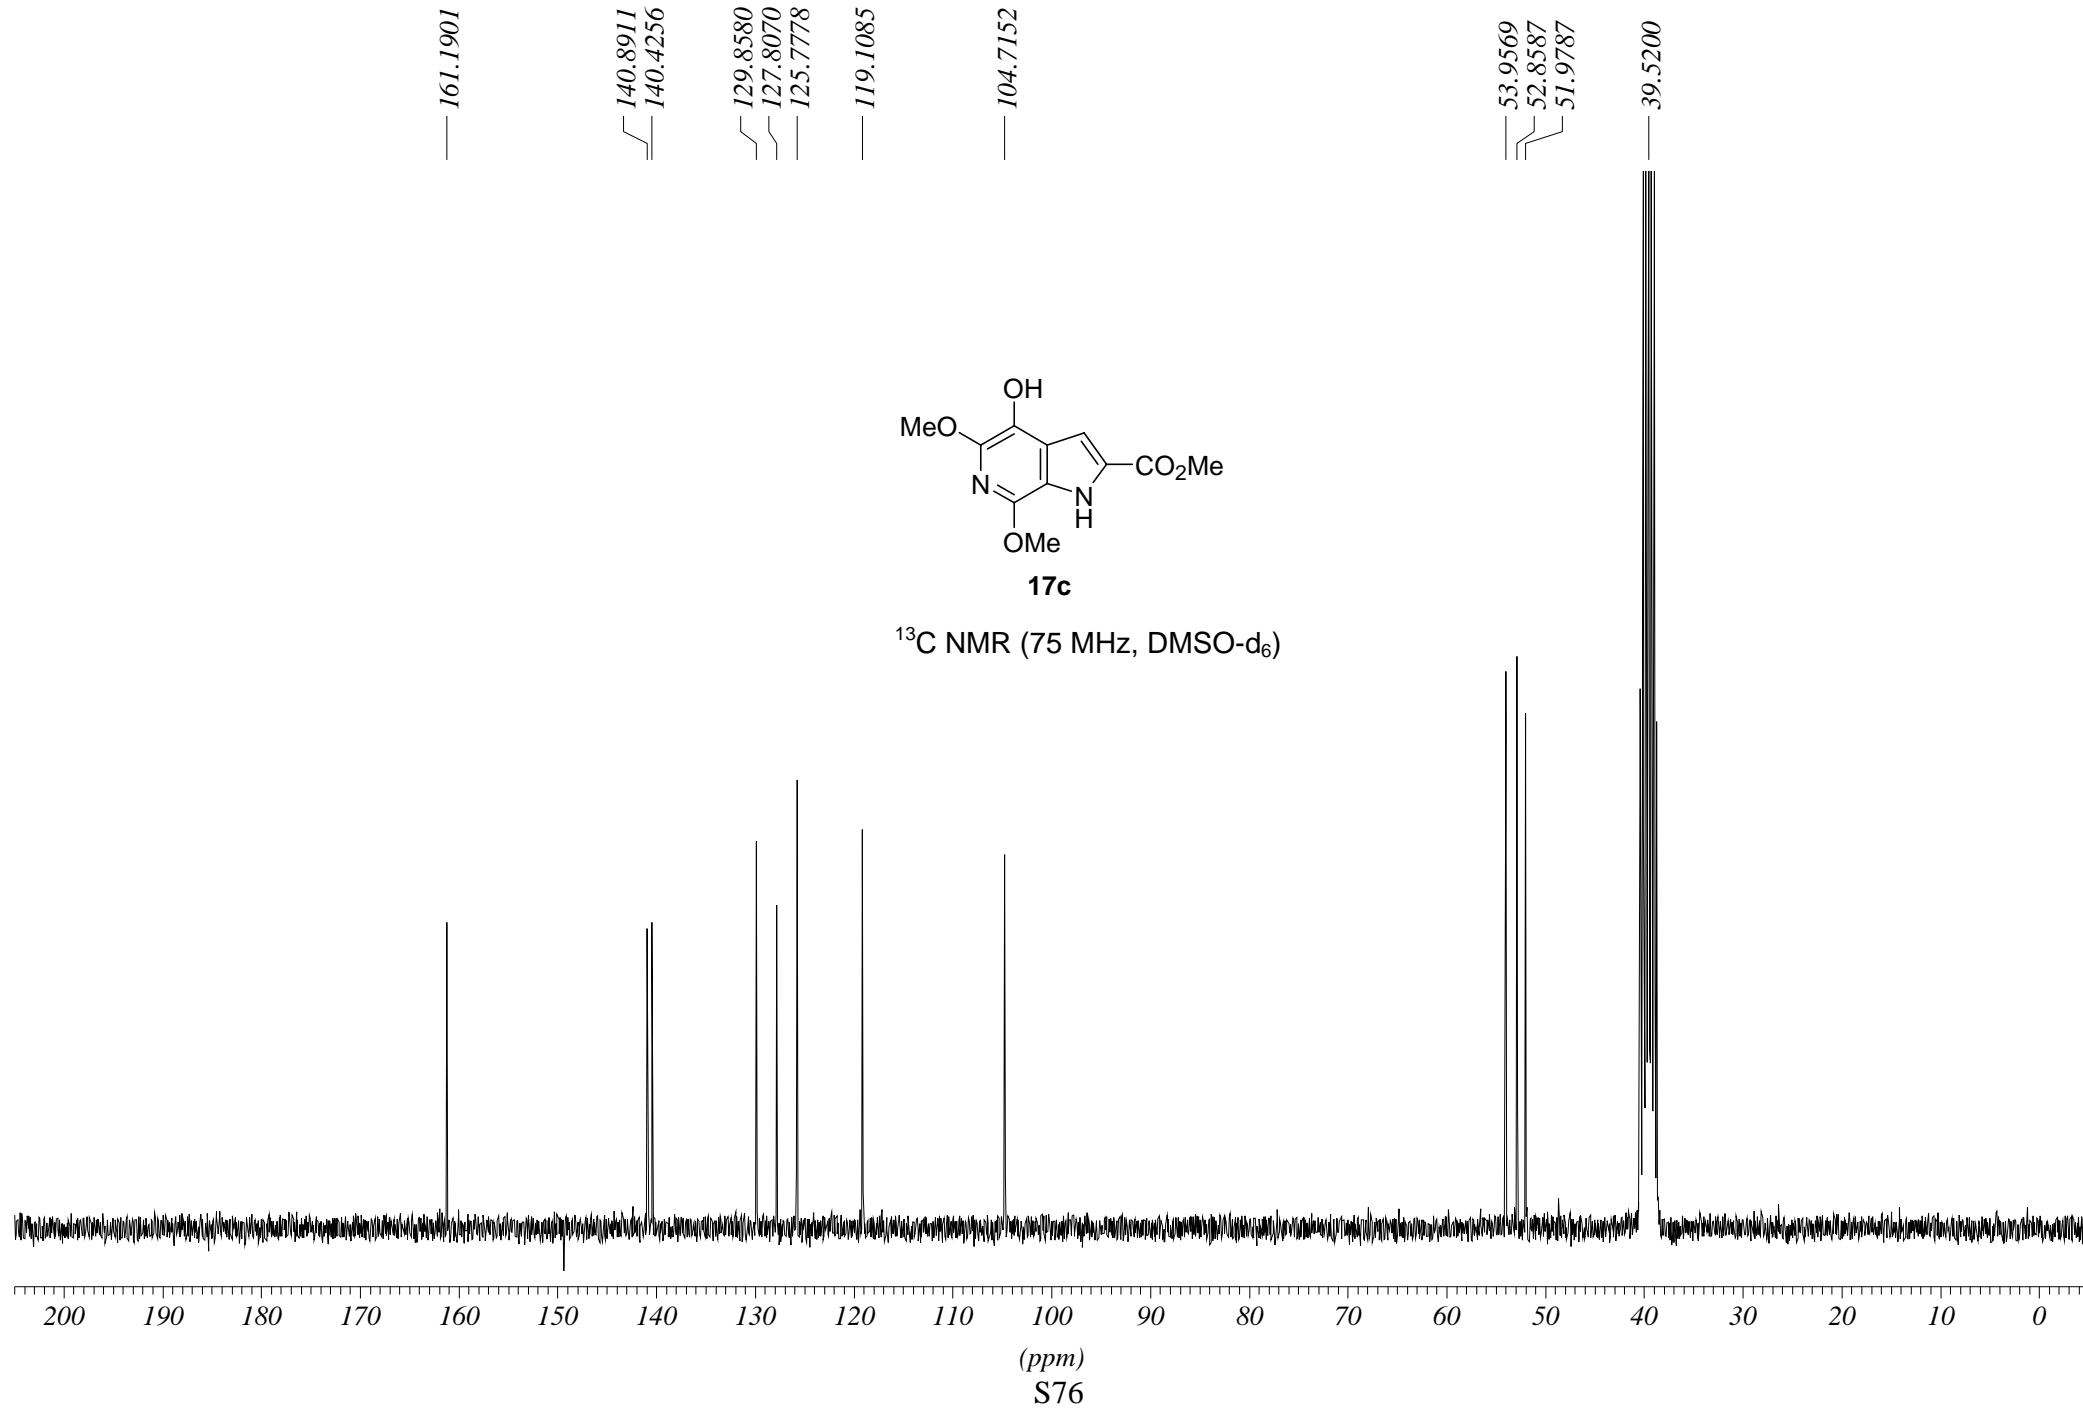

Supplement: b719776d.pdf [file b719776d.pdf]
